# Supplementary material for: Metabolic capacity is maintained despite shifts in microbial diversity in estuary sediments
Source: Research Square preprint supplement (doi:10.21203/rs.3.rs-2838418/v1), 2023-04-20
Supplement: Supplementary file 2 [file SupplementaryTable2.xlsx]

## Sheet: Caption
Supplementary Table 2. 639 metagenome-assembled genomes (MAGs) reconstructed from SFB. Taxonomy is provided according to GTDBtk r207 and the 37 marker phylogeny constructed in this work. We also include CheckM completeness and contamination estimates, genome size in MB, relative abundance calculated using CoverM, and the NCBI Biosample accession numbers for these MAGs.

## Sheet: Sheet1
MAG	GTDBtk v2.1.0 taxonomy	37 marker taxonomy	CheckM completeness	CheckM contamination	Genome Size (MB)	Abundance (average CoverM across samples)	NCBI Biosample Accession
8_1_May_SF_Bin13	d__Archaea;p__Asgardarchaeota;c__Heimdallarchaeia;o__UBA460;f__Kariarchaeaceae;g__;s__	Heimdallarchaeota	72.74	9	3.732	0.0350135	SAMN30443171
8_1_Jan_SF_Bin58	d__Archaea;p__Asgardarchaeota;c__Heimdallarchaeia;o__UBA460;f__Kariarchaeaceae;g__LC-2;s__	Heimdallarchaeota	92.52	4.52	4.386	0.0216524	SAMN30443096
4_1_July_SF_Bin37	d__Archaea;p__Asgardarchaeota;c__Thorarchaeia;o__Thorarchaeales;f__Thorarchaeaceae;g__MP8T-1;s__	Thorarchaeota	91.88	4.21	3.043	0.0404922	SAMN30442952
8_1_Jan_SF_Bin79	d__Archaea;p__Hadarchaeota;c__Hadarchaeia;o__Hadarchaeales;f__Hadarchaeaceae;g__DG-33;s__	Hadesarchaea	80.8	4	1.061	0.0240282	SAMN30443111
8_1_Oct_SF_Bin37	d__Archaea;p__Hadarchaeota;c__Hadarchaeia;o__Hadarchaeales;f__Hadarchaeaceae;g__DG-33;s__	Hadesarchaea	84.8	4.04	1.163	0.0262401	SAMN30443207
13_Jan_SF_Bin36	d__Archaea;p__Nanoarchaeota;c__Nanoarchaeia;o__Pacearchaeales;f__GW2011-AR1;g__JAGVXH01;s__	Pacearchaeota	58.8	3.74	0.588	0.0267734	SAMN30442622
4_1_July_SF_Bin26	d__Archaea;p__Thermoplasmatota;c__Thermoplasmata;o__UBA10834;f__DTMW01;g__DTMW01;s__	Thermoplasmata	83.9	1.6	1.452	0.0305312	SAMN30442943
13_Jan_SF_Bin61	d__Archaea;p__Thermoplasmatota;c__Thermoplasmata;o__UBA10834;f__UBA10834;g__UBA10834;s__	Thermoplasmata	98.4	2.8	1.932	0.0398222	SAMN30442635
8_1_Oct_SF_Bin93	d__Archaea;p__Thermoproteota;c__Bathyarchaeia;o__B26-1;f__;g__;s__	Bathyarchaeota	89.32	9.21	1.697	0.0415034	SAMN30443245
8_1_Jan_SF_Bin81	d__Archaea;p__Thermoproteota;c__Bathyarchaeia;o__B26-1;f__B26-1;g__;s__	Bathyarchaeota	74.8	8.55	2.672	0.0228696	SAMN30443113
8_1_Oct_SF_Bin36	d__Archaea;p__Thermoproteota;c__Bathyarchaeia;o__B26-1;f__B26-1;g__;s__	Bathyarchaeota	82.87	7.14	3.298	0.0266574	SAMN30443206
8_1_Oct_SF_Bin87	d__Archaea;p__Thermoproteota;c__Bathyarchaeia;o__B26-1;f__B26-1;g__PIYB01;s__	Bathyarchaeota	60.6	3.16	1.252	0.0250573	SAMN30443241
8_1_Jan_SF_Bin48	d__Archaea;p__Thermoproteota;c__Bathyarchaeia;o__B26-1;f__BA1;g__;s__	Bathyarchaeota	91.28	3.97	2.225	0.0282624	SAMN30443087
8_1_Jan_SF_Bin52	d__Archaea;p__Thermoproteota;c__Bathyarchaeia;o__B26-1;f__BA1;g__;s__	Bathyarchaeota	85.21	9.35	1.759	0.0308014	SAMN30443091
8_1_Jan_SF_Bin74	d__Archaea;p__Thermoproteota;c__Bathyarchaeia;o__B26-1;f__BA1;g__;s__	Bathyarchaeota	89.72	7.01	1.554	0.0776243	SAMN30443108
8_1_July_SF_Bin33	d__Archaea;p__Thermoproteota;c__Bathyarchaeia;o__B26-1;f__BA1;g__;s__	Bathyarchaeota	70.39	2.91	0.841	0.059792	SAMN30443134
8_1_Oct_SF_Bin29	d__Archaea;p__Thermoproteota;c__Bathyarchaeia;o__B26-1;f__BA1;g__;s__	Bathyarchaeota	88.79	8.41	2.121	0.0283318	SAMN30443200
8_1_Oct_SF_Bin35	d__Archaea;p__Thermoproteota;c__Bathyarchaeia;o__B26-1;f__BA1;g__;s__	Bathyarchaeota	78.04	4.67	1.477	0.073059	SAMN30443205
8_1_Oct_SF_Bin81	d__Archaea;p__Thermoproteota;c__Bathyarchaeia;o__B26-1;f__BA1;g__;s__	Bathyarchaeota	65.73	8.41	1.788	0.0279681	SAMN30443236
8_1_Oct_SF_Bin41	d__Archaea;p__Thermoproteota;c__Bathyarchaeia;o__B26-1;f__BA1;g__BIN-L-1;s__	Bathyarchaeota	57.48	6.65	1.362	0.0625723	SAMN30443210
4_1_July_SF_Bin41	d__Archaea;p__Thermoproteota;c__Bathyarchaeia;o__B26-1;f__BA1;g__Kmv02;s__	Bathyarchaeota	52.69	1.25	0.637	0.100241	SAMN30442954
8_1_Jan_SF_Bin55	d__Archaea;p__Thermoproteota;c__Bathyarchaeia;o__B26-1;f__BA1;g__Kmv02;s__	Bathyarchaeota	70.25	6.53	1.701	0.107491	SAMN30443094
8_1_Jan_SF_Bin71	d__Archaea;p__Thermoproteota;c__Bathyarchaeia;o__B26-1;f__BA1;g__Kmv02;s__	Bathyarchaeota	76.64	5.61	1.267	0.119775	SAMN30443106
8_1_July_SF_Bin73	d__Archaea;p__Thermoproteota;c__Bathyarchaeia;o__B26-1;f__BA1;g__Kmv02;s__	Bathyarchaeota	80.96	6.85	1.372	0.124866	SAMN30443166
8_1_May_SF_Bin8	d__Archaea;p__Thermoproteota;c__Bathyarchaeia;o__B26-1;f__BA1;g__Kmv02;s__	Bathyarchaeota	87.47	7.79	1.556	0.136767	SAMN30443176
8_1_Oct_SF_Bin52	d__Archaea;p__Thermoproteota;c__Bathyarchaeia;o__B26-1;f__BA1;g__Kmv02;s__	Bathyarchaeota	79.29	4.85	1.279	0.121898	SAMN30443215
8_1_Oct_SF_Bin53	d__Archaea;p__Thermoproteota;c__Bathyarchaeia;o__B26-1;f__BA1;g__Kmv02;s__	Bathyarchaeota	68.22	7.55	1.57	0.105583	SAMN30443216
8_1_Jan_SF_Bin101	d__Archaea;p__Thermoproteota;c__Bathyarchaeia;o__B26-1;f__BA1;g__SOJZ01;s__	Bathyarchaeota	77.67	5.49	2.032	0.0579107	SAMN30443059
8_1_Oct_SF_Bin103	d__Archaea;p__Thermoproteota;c__Bathyarchaeia;o__B26-1;f__BA1;g__SOJZ01;s__	Bathyarchaeota	72.59	5.99	1.284	0.0533331	SAMN30443182
8_1_Jan_SF_Bin46	d__Archaea;p__Thermoproteota;c__Bathyarchaeia;o__B26-1;f__SOJC01;g__;s__	Bathyarchaeota	94.39	5.14	1.729	0.0323358	SAMN30443086
8_1_July_SF_Bin42	d__Archaea;p__Thermoproteota;c__Bathyarchaeia;o__B26-1;f__SOJC01;g__;s__	Bathyarchaeota	91.12	4.67	1.585	0.0293527	SAMN30443142
8_1_Oct_SF_Bin100	d__Archaea;p__Thermoproteota;c__Bathyarchaeia;o__B26-1;f__SOJC01;g__;s__	Bathyarchaeota	52.46	6.37	0.661	0.0304319	SAMN30443179
8_1_Jan_SF_Bin32	d__Archaea;p__Thermoproteota;c__Bathyarchaeia;o__B26-1;f__UBA233;g__;s__	Bathyarchaeota	91.59	8.41	2.293	0.0806239	SAMN30443074
8_1_Jan_SF_Bin50	d__Archaea;p__Thermoproteota;c__Bathyarchaeia;o__B26-1;f__UBA233;g__;s__	Bathyarchaeota	58.1	1.87	0.915	0.0344542	SAMN30443089
8_1_Jan_SF_Bin96	d__Archaea;p__Thermoproteota;c__Bathyarchaeia;o__B26-1;f__UBA233;g__;s__	Bathyarchaeota	100	3.74	2.203	0.0208946	SAMN30443122
8_1_Oct_SF_Bin62	d__Archaea;p__Thermoproteota;c__Bathyarchaeia;o__B26-1;f__UBA233;g__;s__	Bathyarchaeota	92.92	5.92	2.143	0.0668103	SAMN30443222
8_1_Oct_SF_Bin71	d__Archaea;p__Thermoproteota;c__Bathyarchaeia;o__B26-1;f__UBA233;g__;s__	Bathyarchaeota	75.23	5.14	1.232	0.0412056	SAMN30443228
8_1_Oct_SF_Bin85	d__Archaea;p__Thermoproteota;c__Bathyarchaeia;o__B26-1;f__UBA233;g__;s__	Bathyarchaeota	62.22	9.18	1.217	0.123599	SAMN30443240
8_1_Oct_SF_Bin96	d__Archaea;p__Thermoproteota;c__Bathyarchaeia;o__B26-1;f__UBA233;g__;s__	Bathyarchaeota	95.9	2.88	1.976	0.0178786	SAMN30443247
8_1_Oct_SF_Bin80	d__Archaea;p__Thermoproteota;c__Bathyarchaeia;o__RBG-16-48-13;f__;g__;s__	Bathyarchaeota	70.87	6.54	1.629	0.0296605	SAMN30443235
8_1_Jan_SF_Bin12	d__Archaea;p__Thermoproteota;c__Bathyarchaeia;o__TCS64;f__TCS64;g__;s__	Bathyarchaeota	67.4	8.25	2.049	0.0693902	SAMN30443064
8_1_Oct_SF_Bin84	d__Archaea;p__Thermoproteota;c__Bathyarchaeia;o__TCS64;f__TCS64;g__;s__	Bathyarchaeota	76.1	7.48	2.066	0.0782563	SAMN30443239
8_1_Jan_SF_Bin36	d__Archaea;p__Thermoproteota;c__Nitrososphaeria_A;o__Caldarchaeales;f__;g__;s__	Aigarchaeota	81.72	5.41	1.592	0.0263798	SAMN30443078
8_1_Oct_SF_Bin33	d__Archaea;p__Thermoproteota;c__Nitrososphaeria_A;o__Caldarchaeales;f__;g__;s__	Aigarchaeota	82.69	6.8	1.59	0.0279453	SAMN30443203
13_July_SF_Bin39	d__Archaea;p__Thermoproteota;c__Nitrososphaeria;o__Nitrososphaerales;f__Nitrosopumilaceae;g__JACEMX01;s__	Thaumarchaeota; Nitrosopumilus	94.17	2.91	1.582	0.0484394	SAMN30442660
13_May_SF_Bin54	d__Archaea;p__Thermoproteota;c__Nitrososphaeria;o__Nitrososphaerales;f__Nitrosopumilaceae;g__JACEMX01;s__	Thaumarchaeota; Nitrosopumilus	95.15	1.46	1.763	0.054123	SAMN30442702
21_Jan_SF_Bin31	d__Archaea;p__Thermoproteota;c__Nitrososphaeria;o__Nitrososphaerales;f__Nitrosopumilaceae;g__JACEMX01;s__	Thaumarchaeota; Nitrosopumilus	76.7	0.97	1.298	0.062858	SAMN30442761
21_Jan_SF_Bin36	d__Archaea;p__Thermoproteota;c__Nitrososphaeria;o__Nitrososphaerales;f__Nitrosopumilaceae;g__JACEMX01;s__	Thaumarchaeota; Nitrosopumilus	90.78	8.74	1.736	0.0754986	SAMN30442764
21_Jan_SF_Bin51	d__Archaea;p__Thermoproteota;c__Nitrososphaeria;o__Nitrososphaerales;f__Nitrosopumilaceae;g__JACEMX01;s__	Thaumarchaeota; Nitrosopumilus	71.84	0.97	1.39	0.0558993	SAMN30442779
21_May_SF_Bin40	d__Archaea;p__Thermoproteota;c__Nitrososphaeria;o__Nitrososphaerales;f__Nitrosopumilaceae;g__JACEMX01;s__	Thaumarchaeota; Nitrosopumilus	66.59	1.94	1.238	0.0589167	SAMN30442824
13_July_SF_Bin33	d__Archaea;p__Thermoproteota;c__Nitrososphaeria;o__Nitrososphaerales;f__Nitrosopumilaceae;g__Nitrosarchaeum_A;s__	Thaumarchaeota; Nitrosopumilus	95.63	1.94	1.68	0.0718248	SAMN30442654
13_May_SF_Bin47	d__Archaea;p__Thermoproteota;c__Nitrososphaeria;o__Nitrososphaerales;f__Nitrosopumilaceae;g__Nitrosarchaeum_A;s__	Thaumarchaeota; Nitrosopumilus	85.31	2.91	1.273	0.0568814	SAMN30442697
13_Jan_SF_Bin40	d__Archaea;p__Thermoproteota;c__Nitrososphaeria;o__Nitrososphaerales;f__Nitrosopumilaceae;g__Nitrosopumilus;s__	Thaumarchaeota; Nitrosopumilus	89.81	7.12	1.986	0.106841	SAMN30442624
13_Jan_SF_Bin52	d__Archaea;p__Thermoproteota;c__Nitrososphaeria;o__Nitrososphaerales;f__Nitrosopumilaceae;g__Nitrosopumilus;s__	Thaumarchaeota; Nitrosopumilus	75.73	0	1.152	0.127124	SAMN30442631
13_Jan_SF_Bin63	d__Archaea;p__Thermoproteota;c__Nitrososphaeria;o__Nitrososphaerales;f__Nitrosopumilaceae;g__Nitrosopumilus;s__	Thaumarchaeota; Nitrosopumilus	73.3	9.71	1.368	0.248127	SAMN30442637
13_July_SF_Bin28	d__Archaea;p__Thermoproteota;c__Nitrososphaeria;o__Nitrososphaerales;f__Nitrosopumilaceae;g__Nitrosopumilus;s__	Thaumarchaeota; Nitrosopumilus	87.38	1.94	1.947	0.0759914	SAMN30442650
13_July_SF_Bin30	d__Archaea;p__Thermoproteota;c__Nitrososphaeria;o__Nitrososphaerales;f__Nitrosopumilaceae;g__Nitrosopumilus;s__	Thaumarchaeota; Nitrosopumilus	66.5	0	1.334	0.106797	SAMN30442651
13_May_SF_Bin26	d__Archaea;p__Thermoproteota;c__Nitrososphaeria;o__Nitrososphaerales;f__Nitrosopumilaceae;g__Nitrosopumilus;s__	Thaumarchaeota; Nitrosopumilus	80.58	5.9	1.513	0.102659	SAMN30442681
13_May_SF_Bin55	d__Archaea;p__Thermoproteota;c__Nitrososphaeria;o__Nitrososphaerales;f__Nitrosopumilaceae;g__Nitrosopumilus;s__	Thaumarchaeota; Nitrosopumilus	57.28	1.94	0.78	0.0730249	SAMN30442703
13_May_SF_Bin67	d__Archaea;p__Thermoproteota;c__Nitrososphaeria;o__Nitrososphaerales;f__Nitrosopumilaceae;g__Nitrosopumilus;s__	Thaumarchaeota; Nitrosopumilus	95.15	5.83	2.128	0.0868398	SAMN30442713
13_May_SF_Bin89	d__Archaea;p__Thermoproteota;c__Nitrososphaeria;o__Nitrososphaerales;f__Nitrosopumilaceae;g__Nitrosopumilus;s__	Thaumarchaeota; Nitrosopumilus	100	0.97	1.812	0.130315	SAMN30442728
13_Oct_SF_Bin27	d__Archaea;p__Thermoproteota;c__Nitrososphaeria;o__Nitrososphaerales;f__Nitrosopumilaceae;g__Nitrosopumilus;s__	Thaumarchaeota; Nitrosopumilus	79.61	0.97	1.508	0.110639	SAMN30442741
21_Jan_SF_Bin27	d__Archaea;p__Thermoproteota;c__Nitrososphaeria;o__Nitrososphaerales;f__Nitrosopumilaceae;g__Nitrosopumilus;s__	Thaumarchaeota; Nitrosopumilus	87.06	5.83	1.561	0.217993	SAMN30442758
21_Jan_SF_Bin57	d__Archaea;p__Thermoproteota;c__Nitrososphaeria;o__Nitrososphaerales;f__Nitrosopumilaceae;g__Nitrosopumilus;s__	Thaumarchaeota; Nitrosopumilus	66.67	1.46	1.087	0.33436	SAMN30442785
21_July_SF_Bin12	d__Archaea;p__Thermoproteota;c__Nitrososphaeria;o__Nitrososphaerales;f__Nitrosopumilaceae;g__Nitrosopumilus;s__	Thaumarchaeota; Nitrosopumilus	94.17	0.32	1.745	0.201022	SAMN30442800
21_July_SF_Bin24	d__Archaea;p__Thermoproteota;c__Nitrososphaeria;o__Nitrososphaerales;f__Nitrosopumilaceae;g__Nitrosopumilus;s__	Thaumarchaeota; Nitrosopumilus	89.73	9.95	2.051	0.138609	SAMN30442807
21_July_SF_Bin26	d__Archaea;p__Thermoproteota;c__Nitrososphaeria;o__Nitrososphaerales;f__Nitrosopumilaceae;g__Nitrosopumilus;s__	Thaumarchaeota; Nitrosopumilus	85.44	4.69	1.419	0.414643	SAMN30442808
21_May_SF_Bin28	d__Archaea;p__Thermoproteota;c__Nitrososphaeria;o__Nitrososphaerales;f__Nitrosopumilaceae;g__Nitrosopumilus;s__	Thaumarchaeota; Nitrosopumilus	68.5	2.91	1.497	0.439277	SAMN30442818
21_May_SF_Bin41	d__Archaea;p__Thermoproteota;c__Nitrososphaeria;o__Nitrososphaerales;f__Nitrosopumilaceae;g__Nitrosopumilus;s__	Thaumarchaeota; Nitrosopumilus	91.3	2.91	1.641	0.197581	SAMN30442825
21_Oct_SF_Bin16	d__Archaea;p__Thermoproteota;c__Nitrososphaeria;o__Nitrososphaerales;f__Nitrosopumilaceae;g__Nitrosopumilus;s__	Thaumarchaeota; Nitrosopumilus	94.59	4.85	2.147	0.202896	SAMN30442831
21_Oct_SF_Bin25	d__Archaea;p__Thermoproteota;c__Nitrososphaeria;o__Nitrososphaerales;f__Nitrosopumilaceae;g__Nitrosopumilus;s__	Thaumarchaeota; Nitrosopumilus	55.08	1.29	1.283	0.385457	SAMN30442837
21_Oct_SF_Bin27	d__Archaea;p__Thermoproteota;c__Nitrososphaeria;o__Nitrososphaerales;f__Nitrosopumilaceae;g__Nitrosopumilus;s__	Thaumarchaeota; Nitrosopumilus	93.2	2.91	1.478	0.412819	SAMN30442838
8_1_Jan_SF_Bin45	d__Archaea;p__Thermoproteota;c__Nitrososphaeria;o__Nitrososphaerales;f__Nitrosopumilaceae;g__Nitrosopumilus;s__	Thaumarchaeota; Nitrosopumilus	60.19	0	1.109	0.0473984	SAMN30443085
8_1_Jan_SF_Bin59	d__Archaea;p__Thermoproteota;c__Nitrososphaeria;o__Nitrososphaerales;f__Nitrosopumilaceae;g__Nitrosopumilus;s__	Thaumarchaeota; Nitrosopumilus	56.8	0	0.596	0.180922	SAMN30443097
8_1_Jan_SF_Bin66	d__Archaea;p__Thermoproteota;c__Nitrososphaeria;o__Nitrososphaerales;f__Nitrosopumilaceae;g__Nitrosopumilus;s__	Thaumarchaeota; Nitrosopumilus	100	7.77	1.655	0.107883	SAMN30443103
8_1_Jan_SF_Bin67	d__Archaea;p__Thermoproteota;c__Nitrososphaeria;o__Nitrososphaerales;f__Nitrosopumilaceae;g__Nitrosopumilus;s__	Thaumarchaeota; Nitrosopumilus	85.76	4.37	1.885	0.112695	SAMN30443104
8_1_July_SF_Bin35	d__Archaea;p__Thermoproteota;c__Nitrososphaeria;o__Nitrososphaerales;f__Nitrosopumilaceae;g__Nitrosopumilus;s__	Thaumarchaeota; Nitrosopumilus	100	0.97	1.807	0.125231	SAMN30443136
8_1_July_SF_Bin59	d__Archaea;p__Thermoproteota;c__Nitrososphaeria;o__Nitrososphaerales;f__Nitrosopumilaceae;g__Nitrosopumilus;s__	Thaumarchaeota; Nitrosopumilus	98.06	2.83	1.587	0.25042	SAMN30443153
8_1_May_SF_Bin10	d__Archaea;p__Thermoproteota;c__Nitrososphaeria;o__Nitrososphaerales;f__Nitrosopumilaceae;g__Nitrosopumilus;s__	Thaumarchaeota; Nitrosopumilus	71.2	4.85	1.319	0.0815965	SAMN30443168
8_1_May_SF_Bin9	d__Archaea;p__Thermoproteota;c__Nitrososphaeria;o__Nitrososphaerales;f__Nitrosopumilaceae;g__Nitrosopumilus;s__	Thaumarchaeota; Nitrosopumilus	80.26	1.05	1.318	0.05589	SAMN30443177
8_1_Oct_SF_Bin45	d__Archaea;p__Thermoproteota;c__Nitrososphaeria;o__Nitrososphaerales;f__Nitrosopumilaceae;g__Nitrosopumilus;s__	Thaumarchaeota; Nitrosopumilus	78.73	0.8	1.066	0.0896367	SAMN30443212
4_1_July_SF_Bin33	d__Bacteria;p__Acidobacteriota;c__Aminicenantia;o__Aminicenantales;f__Aminicenantaceae;g__;s__	Aminicenantes	94.51	9.33	4.298	0.0223107	SAMN30442949
8_1_Jan_SF_Bin35	d__Bacteria;p__Acidobacteriota;c__Aminicenantia;o__Aminicenantales;f__Aminicenantaceae;g__;s__	Aminicenantes	82.24	7.26	3.929	0.0198018	SAMN30443077
8_1_Oct_SF_Bin67	d__Bacteria;p__Acidobacteriota;c__Aminicenantia;o__Aminicenantales;f__Aminicenantaceae;g__;s__	Aminicenantes	72.42	8.76	3.558	0.0195808	SAMN30443225
4_1_July_SF_Bin54	d__Bacteria;p__Acidobacteriota;c__Aminicenantia;o__Aminicenantales;f__Aminicenantaceae;g__SOIA01;s__	Aminicenantes	53.99	0.85	1.483	0.0248508	SAMN30442966
8_1_Jan_SF_Bin49	d__Bacteria;p__Acidobacteriota;c__Aminicenantia;o__Aminicenantales;f__Aminicenantaceae;g__SOIA01;s__	Aminicenantes	92.14	5.13	3.511	0.03227	SAMN30443088
8_1_Oct_SF_Bin32	d__Bacteria;p__Acidobacteriota;c__Aminicenantia;o__Aminicenantales;f__Aminicenantaceae;g__SOIA01;s__	Aminicenantes	90.37	6.05	3.495	0.0323058	SAMN30443202
4_1_July_SF_Bin30	d__Bacteria;p__Acidobacteriota;c__Aminicenantia;o__Aminicenantales;f__RBG-16-66-30;g__;s__	Aminicenantes	80.43	6.15	3.18	0.0361276	SAMN30442947
4_1_July_SF_Bin61	d__Bacteria;p__Acidobacteriota;c__Aminicenantia;o__Aminicenantales;f__UBA8522;g__UBA8522;s__	Aminicenantes	54.02	3.09	3.079	0.03489	SAMN30442972
8_1_Jan_SF_Bin62	d__Bacteria;p__Acidobacteriota;c__B3-B38;o__B3-B38;f__B3-B38;g__Guanabacterium;s__	Aminicenantes	75.64	3.89	2.125	0.0337545	SAMN30443100
8_1_Oct_SF_Bin20	d__Bacteria;p__Acidobacteriota;c__B3-B38;o__B3-B38;f__B3-B38;g__Guanabacterium;s__	Aminicenantes	77.78	1.28	2.231	0.0338072	SAMN30443194
13_July_SF_Bin26	d__Bacteria;p__Acidobacteriota;c__Blastocatellia;o__Pyrinomonadales;f__Pyrinomonadaceae;g__QQUY01;s__	Acidobacteria	70.01	1.12	3.349	0.0223152	SAMN30442648
13_May_SF_Bin9	d__Bacteria;p__Acidobacteriota;c__Blastocatellia;o__Pyrinomonadales;f__Pyrinomonadaceae;g__QQUY01;s__	Acidobacteria	83.28	1.76	3.537	0.0227664	SAMN30442729
13_May_SF_Bin61	d__Bacteria;p__Acidobacteriota;c__Mor1;o__J045;f__J045;g__;s__	Acidobacteria	70.75	6.27	3.171	0.0663192	SAMN30442708
21_Jan_SF_Bin44	d__Bacteria;p__Acidobacteriota;c__Mor1;o__Mor1;f__Mor1;g__;s__	Acidobacteria	98.12	2.99	4.185	0.0393533	SAMN30442772
21_May_SF_Bin2	d__Bacteria;p__Acidobacteriota;c__Mor1;o__Mor1;f__Mor1;g__;s__	Acidobacteria	82.66	0.9	3.445	0.0328548	SAMN30442810
21_May_SF_Bin25	d__Bacteria;p__Acidobacteriota;c__Thermoanaerobaculia;o__Thermoanaerobaculales;f__FEB-10;g__JACXWA01;s__	Acidobacteria	89.74	8.44	4.531	0.117076	SAMN30442815
13_July_SF_Bin37	d__Bacteria;p__Acidobacteriota;c__Thermoanaerobaculia;o__UBA5704;f__UBA5704;g__;s__	Acidobacteria	78.99	2.14	3.672	0.0630294	SAMN30442658
13_May_SF_Bin12	d__Bacteria;p__Acidobacteriota;c__Thermoanaerobaculia;o__UBA5704;f__UBA5704;g__;s__	Acidobacteria	69.82	0.85	2.692	0.0546996	SAMN30442673
13_May_SF_Bin86	d__Bacteria;p__Acidobacteriota;c__Thermoanaerobaculia;o__UBA5704;f__UBA5704;g__;s__	Acidobacteria	94.82	1.28	4.492	0.0735555	SAMN30442725
21_Jan_SF_Bin62	d__Bacteria;p__Acidobacteriota;c__Thermoanaerobaculia;o__UBA5704;f__UBA5704;g__;s__	Acidobacteria	88.49	4.34	3.386	0.0445745	SAMN30442788
4_1_Jan_SF_Bin21	d__Bacteria;p__Acidobacteriota;c__Vicinamibacteria;o__Vicinamibacterales;f__UBA2999;g__VFZN01;s__	Acidobacteria	54.39	8.33	4.346	0.0651974	SAMN30442900
21_Jan_SF_Bin67	d__Bacteria;p__Actinobacteriota;c__Acidimicrobiia;o__Acidimicrobiales;f__;g__;s__	Actinobacteria	94.18	6.41	3.969	0.0547029	SAMN30442789
4_1_Jan_SF_Bin58	d__Bacteria;p__Actinobacteriota;c__Acidimicrobiia;o__Acidimicrobiales;f__CAIXPF01;g__WHTX01;s__	Actinobacteria	90.3	8.4	5.417	0.0747486	SAMN30442925
21_Jan_SF_Bin53	d__Bacteria;p__Actinobacteriota;c__Acidimicrobiia;o__Acidimicrobiales;f__SHLQ01;g__;s__	Actinobacteria	70.26	6.22	3.563	0.0551868	SAMN30442781
4_1_May_SF_Bin69	d__Bacteria;p__Actinobacteriota;c__Acidimicrobiia;o__Acidimicrobiales;f__SHLQ01;g__;s__	Actinobacteria	66.12	1.87	2.852	0.0452599	SAMN30443014
4_1_Jan_SF_Bin55	d__Bacteria;p__Actinobacteriota;c__Acidimicrobiia;o__Acidimicrobiales;f__SHLQ01;g__JABDJW01;s__	Actinobacteria	94.87	1.38	4.062	0.0574357	SAMN30442922
13_May_SF_Bin57	d__Bacteria;p__Actinobacteriota;c__Acidimicrobiia;o__Acidimicrobiales;f__SZUA-35;g__CADEDH01;s__	Actinobacteria	94.02	4.7	5.042	0.0612221	SAMN30442704
13_May_SF_Bin62	d__Bacteria;p__Actinobacteriota;c__Acidimicrobiia;o__Acidimicrobiales;f__SZUA-35;g__CADEDH01;s__	Actinobacteria	72.03	2.56	3.926	0.0513601	SAMN30442709
21_Jan_SF_Bin50	d__Bacteria;p__Actinobacteriota;c__Acidimicrobiia;o__Acidimicrobiales;f__SZUA-35;g__CADEDH01;s__	Actinobacteria	89.74	5.56	6.353	0.0499136	SAMN30442778
4_1_Jan_SF_Bin24	d__Bacteria;p__Actinobacteriota;c__Acidimicrobiia;o__Acidimicrobiales;f__SZUA-35;g__CADEDH01;s__	Actinobacteria	65.8	6.84	3.66	0.0353354	SAMN30442901
4_1_May_SF_Bin1	d__Bacteria;p__Actinobacteriota;c__Acidimicrobiia;o__Acidimicrobiales;f__SZUA-35;g__CADEDH01;s__	Actinobacteria	76.54	3.85	4.391	0.045933	SAMN30442976
4_1_May_SF_Bin50	d__Bacteria;p__Actinobacteriota;c__Acidimicrobiia;o__Acidimicrobiales;f__SZUA-35;g__CADEDH01;s__	Actinobacteria	80.44	3.21	3.907	0.0370411	SAMN30442996
4_1_Oct_SF_Bin2	d__Bacteria;p__Actinobacteriota;c__Acidimicrobiia;o__Acidimicrobiales;f__SZUA-35;g__CADEDH01;s__	Actinobacteria	70.62	3.85	3.482	0.0347637	SAMN30443026
8_1_July_SF_Bin52	d__Bacteria;p__Actinobacteriota;c__Acidimicrobiia;o__Acidimicrobiales;f__SZUA-35;g__CADEDH01;s__	Actinobacteria	60.45	5.9	3.137	0.0376606	SAMN30443148
13_July_SF_Bin48	d__Bacteria;p__Actinobacteriota;c__Acidimicrobiia;o__UBA5794;f__;g__;s__	Actinobacteria	53.7	2.71	1.475	0.0430691	SAMN30442663
13_May_SF_Bin73	d__Bacteria;p__Actinobacteriota;c__Acidimicrobiia;o__UBA5794;f__;g__;s__	Actinobacteria	85.64	4.04	2.24	0.0511043	SAMN30442717
21_Jan_SF_Bin8	d__Bacteria;p__Actinobacteriota;c__Acidimicrobiia;o__UBA5794;f__;g__;s__	Actinobacteria	79.06	5.98	2.214	0.0498616	SAMN30442796
4_1_Jan_SF_Bin7	d__Bacteria;p__Actinobacteriota;c__Acidimicrobiia;o__UBA5794;f__;g__;s__	Actinobacteria	85.16	2.71	4.087	0.0372772	SAMN30442933
4_1_May_SF_Bin47	d__Bacteria;p__Actinobacteriota;c__Acidimicrobiia;o__UBA5794;f__;g__;s__	Actinobacteria	83.76	2.71	3.982	0.0371144	SAMN30442994
4_1_Oct_SF_Bin17	d__Bacteria;p__Actinobacteriota;c__Acidimicrobiia;o__UBA5794;f__;g__;s__	Actinobacteria	70.23	3.16	3.125	0.0331061	SAMN30443023
13_May_SF_Bin59	d__Bacteria;p__Actinobacteriota;c__Acidimicrobiia;o__UBA5794;f__JAENVV01;g__;s__	Actinobacteria	75.69	6.41	3.049	0.0473534	SAMN30442706
8_1_Jan_SF_Bin34	d__Bacteria;p__Actinobacteriota;c__Acidimicrobiia;o__UBA5794;f__JAENVV01;g__;s__	Actinobacteria	72.19	3.94	2.533	0.0535653	SAMN30443076
13_May_SF_Bin24	d__Bacteria;p__Actinobacteriota;c__Acidimicrobiia;o__UBA5794;f__JAENVV01;g__JAENVV01;s__	Actinobacteria	53.41	3.73	1.706	0.0246214	SAMN30442680
8_1_Jan_SF_Bin73	d__Bacteria;p__Actinobacteriota;c__Acidimicrobiia;o__UBA5794;f__JAENVV01;g__JAENVV01;s__	Actinobacteria	88.03	4.27	2.923	0.0296853	SAMN30443107
8_1_July_SF_Bin47	d__Bacteria;p__Actinobacteriota;c__Acidimicrobiia;o__UBA5794;f__JAENVV01;g__JAENVV01;s__	Actinobacteria	96.58	4.7	3.083	0.0280302	SAMN30443145
13_May_SF_Bin87	d__Bacteria;p__Actinobacteriota;c__Acidimicrobiia;o__UBA5794;f__S012-128;g__;s__	Actinobacteria	51.76	1.28	1.292	0.0647642	SAMN30442726
21_Jan_SF_Bin35	d__Bacteria;p__Actinobacteriota;c__Acidimicrobiia;o__UBA5794;f__SHLN01;g__;s__	Actinobacteria	79.06	3.42	2.143	0.0463126	SAMN30442763
13_May_SF_Bin97	d__Bacteria;p__Actinobacteriota;c__Acidimicrobiia;o__UBA5794;f__SHLN01;g__SHLN01;s__	Actinobacteria	75.93	9.4	2.529	0.0650716	SAMN30442734
13_May_SF_Bin8	d__Bacteria;p__Actinobacteriota;c__Acidimicrobiia;o__UBA5794;f__SZUA-232;g__;s__	Actinobacteria	55.56	2.99	2.303	0.0368342	SAMN30442721
13_July_SF_Bin43	d__Bacteria;p__Actinobacteriota;c__Acidimicrobiia;o__UBA5794;f__UBA4744;g__UBA4744;s__	Actinobacteria	94.02	6.51	2.936	0.0498269	SAMN30442662
13_May_SF_Bin27	d__Bacteria;p__Actinobacteriota;c__Acidimicrobiia;o__UBA5794;f__UBA4744;g__UBA4744;s__	Actinobacteria	92.74	2.14	3.081	0.0553277	SAMN30442682
8_1_July_SF_Bin7	d__Bacteria;p__Actinobacteriota;c__Acidimicrobiia;o__UBA5794;f__UBA4744;g__UBA4744;s__	Actinobacteria	51.72	7.53	1.811	0.0446811	SAMN30443163
13_May_SF_Bin46	d__Bacteria;p__Actinobacteriota;c__Acidimicrobiia;o__UBA5794;f__ZC4RG35;g__;s__	Actinobacteria	85	9.4	3.591	0.0506173	SAMN30442696
13_July_SF_Bin34	d__Bacteria;p__Actinobacteriota;c__Acidimicrobiia;o__UBA5794;f__ZC4RG35;g__MA-ANB-1;s__	Actinobacteria	65.22	2.74	1.957	0.0309381	SAMN30442655
13_May_SF_Bin37	d__Bacteria;p__Actinobacteriota;c__Acidimicrobiia;o__UBA5794;f__ZC4RG35;g__MA-ANB-1;s__	Actinobacteria	60.4	1.36	1.706	0.0292481	SAMN30442688
24_May_SF_Bin5	d__Bacteria;p__Actinobacteriota;c__Actinomycetia;o__Nanopelagicales;f__;g__;s__	Actinobacteria	54.36	0.99	1.693	0.0763149	SAMN30442873
4_1_Jan_SF_Bin59	d__Bacteria;p__Actinobacteriota;c__Actinomycetia;o__Nanopelagicales;f__;g__;s__	Actinobacteria	72.47	3.19	2.19	0.0490593	SAMN30442926
4_1_May_SF_Bin62	d__Bacteria;p__Actinobacteriota;c__Actinomycetia;o__Nanopelagicales;f__;g__;s__	Actinobacteria	64.48	1.02	1.807	0.0435063	SAMN30443007
4_1_Oct_SF_Bin19	d__Bacteria;p__Actinobacteriota;c__Actinomycetia;o__Nanopelagicales;f__;g__;s__	Actinobacteria	71.52	0.24	1.862	0.0472916	SAMN30443025
24_Oct_SF_Bin4	d__Bacteria;p__Actinobacteriota;c__Actinomycetia;o__Nanopelagicales;f__GCA-2699445;g__;s__	Actinobacteria	52.83	5.84	2.123	0.0746873	SAMN30442889
4_1_July_SF_Bin14	d__Bacteria;p__Actinobacteriota;c__Coriobacteriia;o__OPB41;f__JAENZW01;g__JAENZW01;s__	Actinobacteria; Coriobacteriaceae	88.33	3.61	1.949	0.0293441	SAMN30442937
4_1_Jan_SF_Bin61	d__Bacteria;p__Actinobacteriota;c__Thermoleophilia;o__Gaiellales;f__Gaiellaceae;g__;s__	Actinobacteria; Thermoleophilia	80.32	1.95	2.699	0.0591691	SAMN30442928
4_1_May_SF_Bin52	d__Bacteria;p__Actinobacteriota;c__Thermoleophilia;o__Gaiellales;f__Gaiellaceae;g__Gaiella;s__	Actinobacteria; Thermoleophilia	68.36	1.72	2.203	0.0552167	SAMN30442998
4_1_Oct_SF_Bin32	d__Bacteria;p__Actinobacteriota;c__Thermoleophilia;o__Gaiellales;f__Gaiellaceae;g__Gaiella;s__	Actinobacteria; Thermoleophilia	61.01	2.82	2.151	0.0532517	SAMN30443038
4_1_Jan_SF_Bin18	d__Bacteria;p__Actinobacteriota;c__Thermoleophilia;o__Gaiellales;f__Gaiellaceae;g__GMQP-bins7;s__	Actinobacteria; Thermoleophilia	93.03	3.02	2.551	0.0349626	SAMN30442898
4_1_May_SF_Bin55	d__Bacteria;p__Actinobacteriota;c__Thermoleophilia;o__Gaiellales;f__Gaiellaceae;g__GMQP-bins7;s__	Actinobacteria; Thermoleophilia	93.1	2.16	2.591	0.0360618	SAMN30443001
4_1_Oct_SF_Bin14	d__Bacteria;p__Actinobacteriota;c__Thermoleophilia;o__Gaiellales;f__Gaiellaceae;g__GMQP-bins7;s__	Actinobacteria; Thermoleophilia	88.22	1.87	2.46	0.0339966	SAMN30443021
21_Jan_SF_Bin72	d__Bacteria;p__Actinobacteriota;c__Thermoleophilia;o__Miltoncostaeales;f__;g__;s__	Actinobacteria	62.21	0.43	1.66	0.0361845	SAMN30442793
13_May_SF_Bin35	d__Bacteria;p__Actinobacteriota;c__Thermoleophilia;o__Miltoncostaeales;f__Miltoncostaeaceae;g__;s__	Actinobacteria	87.13	7.18	2.506	0.0473076	SAMN30442687
4_1_Jan_SF_Bin49	d__Bacteria;p__Actinobacteriota;c__UBA4738;o__UBA4738;f__HRBIN12;g__AC-51;s__	Actinobacteria	85.14	0.85	2.632	0.0350876	SAMN30442918
4_1_May_SF_Bin66	d__Bacteria;p__Actinobacteriota;c__UBA4738;o__UBA4738;f__HRBIN12;g__AC-51;s__	Actinobacteria	80.48	1.88	2.451	0.0329656	SAMN30443011
4_1_Oct_SF_Bin20	d__Bacteria;p__Actinobacteriota;c__UBA4738;o__UBA4738;f__HRBIN12;g__AC-51;s__	Actinobacteria	79.2	2.14	2.461	0.0337256	SAMN30443027
4_1_July_SF_Bin29	d__Bacteria;p__Armatimonadota;c__CAIYQO01;o__WVXJ01;f__;g__;s__	Armatimonadota	54.2	8.62	1.387	0.0407441	SAMN30442945
13_May_SF_Bin4	d__Bacteria;p__Bacteroidota;c__Bacteroidia;o__Chitinophagales;f__Saprospiraceae;g__;s__	Bacteroidetes	76.51	2.52	4.667	0.0257717	SAMN30442690
21_Jan_SF_Bin4	d__Bacteria;p__Bacteroidota;c__Bacteroidia;o__Chitinophagales;f__Saprospiraceae;g__;s__	Bacteroidetes	80.62	7.5	4.936	0.017925	SAMN30442768
21_Jan_SF_Bin48	d__Bacteria;p__Bacteroidota;c__Bacteroidia;o__Cytophagales;f__Cyclobacteriaceae;g__;s__	Bacteroidetes	88.39	3.46	4.177	0.0193285	SAMN30442775
8_1_Jan_SF_Bin4	d__Bacteria;p__Bacteroidota;c__Bacteroidia;o__Cytophagales;f__Cyclobacteriaceae;g__;s__	Bacteroidetes	81.64	6.29	4.055	0.0276485	SAMN30443080
8_1_Jan_SF_Bin40	d__Bacteria;p__Bacteroidota;c__Bacteroidia;o__Cytophagales;f__Cyclobacteriaceae;g__;s__	Bacteroidetes	89.19	4.29	3.428	0.0380052	SAMN30443081
8_1_Jan_SF_Bin42	d__Bacteria;p__Bacteroidota;c__Bacteroidia;o__Cytophagales;f__Cyclobacteriaceae;g__;s__	Bacteroidetes	92.54	6.89	4.751	0.0311274	SAMN30443083
8_1_Jan_SF_Bin89	d__Bacteria;p__Bacteroidota;c__Bacteroidia;o__Cytophagales;f__Cyclobacteriaceae;g__;s__	Bacteroidetes	84.73	4.96	2.853	0.0279781	SAMN30443118
8_1_Oct_SF_Bin109	d__Bacteria;p__Bacteroidota;c__Bacteroidia;o__Cytophagales;f__Cyclobacteriaceae;g__;s__	Bacteroidetes	63.38	9.9	3.036	0.0356997	SAMN30443186
8_1_Oct_SF_Bin11	d__Bacteria;p__Bacteroidota;c__Bacteroidia;o__Cytophagales;f__Cyclobacteriaceae;g__;s__	Bacteroidetes	53.91	2.81	2.066	0.0263857	SAMN30443187
8_1_Oct_SF_Bin14	d__Bacteria;p__Bacteroidota;c__Bacteroidia;o__Cytophagales;f__Cyclobacteriaceae;g__;s__	Bacteroidetes	81.47	4.02	3.032	0.0241389	SAMN30443190
4_1_Jan_SF_Bin44	d__Bacteria;p__Bacteroidota;c__Bacteroidia;o__Cytophagales;f__Cyclobacteriaceae;g__Chryseolinea;s__	Bacteroidetes	99.7	1.88	5.097	0.0333361	SAMN30442917
4_1_May_SF_Bin10	d__Bacteria;p__Bacteroidota;c__Bacteroidia;o__Cytophagales;f__Cyclobacteriaceae;g__Chryseolinea;s__	Bacteroidetes	97.62	4.61	4.965	0.031726	SAMN30442977
4_1_Oct_SF_Bin41	d__Bacteria;p__Bacteroidota;c__Bacteroidia;o__Cytophagales;f__Cyclobacteriaceae;g__Chryseolinea;s__	Bacteroidetes	98.79	2.33	5.09	0.0330205	SAMN30443044
4_1_Jan_SF_Bin36	d__Bacteria;p__Bacteroidota;c__Bacteroidia;o__Cytophagales;f__Cyclobacteriaceae;g__UBA2336;s__	Bacteroidetes	55.27	8.96	1.896	0.0392714	SAMN30442910
8_1_Jan_SF_Bin6	d__Bacteria;p__Bacteroidota;c__Bacteroidia;o__Flavobacteriales;f__Flavobacteriaceae;g__Aureibaculum;s__	Bacteroidetes	81.06	5.87	2.918	0.0434037	SAMN30443098
21_Jan_SF_Bin56	d__Bacteria;p__Bacteroidota;c__Bacteroidia;o__Flavobacteriales;f__Flavobacteriaceae;g__HDS-28;s__	Bacteroidetes	90.29	3.6	2.706	0.0359112	SAMN30442784
21_May_SF_Bin10	d__Bacteria;p__Bacteroidota;c__Bacteroidia;o__Flavobacteriales;f__Flavobacteriaceae;g__HDS-28;s__	Bacteroidetes	52.33	0.4	1.591	0.0260894	SAMN30442809
13_Jan_SF_Bin5	d__Bacteria;p__Bacteroidota;c__Bacteroidia;o__Flavobacteriales;f__Flavobacteriaceae;g__JAGXRT01;s__	Bacteroidetes	58.14	6.8	1.235	0.0370612	SAMN30442630
13_Jan_SF_Bin2	d__Bacteria;p__Bacteroidota;c__Bacteroidia;o__Flavobacteriales;f__Flavobacteriaceae;g__QNYL01;s__	Bacteroidetes	76.28	9.14	2.636	0.0656685	SAMN30442615
13_May_SF_Bin21	d__Bacteria;p__Bacteroidota;c__Ignavibacteria;o__Ignavibacteriales;f__Ignavibacteriaceae;g__IGN2;s__	Ignavibacteriae	73.52	3.63	2.486	0.0515058	SAMN30442677
4_1_Jan_SF_Bin14	d__Bacteria;p__Bacteroidota;c__UBA10030;o__UBA10030;f__;g__;s__	Ignavibacteriae	90.11	4.12	2.762	0.0379885	SAMN30442896
13_May_SF_Bin23	d__Bacteria;p__Bacteroidota;c__UBA10030;o__UBA10030;f__UBA6906;g__;s__	Ignavibacteriae	53.41	1.37	2.155	0.0281447	SAMN30442679
8_1_Oct_SF_Bin17	d__Bacteria;p__Bdellovibrionota;c__Bacteriovoracia;o__Bacteriovoracales;f__Bacteriovoracaceae;g__;s__	Proteobacteria; Oligoflexia	62.24	0	1.736	0.0262083	SAMN30443191
8_1_Jan_SF_Bin51	d__Bacteria;p__Campylobacterota;c__Campylobacteria;o__Campylobacterales;f__Sulfurimonadaceae;g__;s__	Proteobacteria; Epsilonproteobacteria	65.11	3.05	1.512	0.0377999	SAMN30443090
21_Jan_SF_Bin5	d__Bacteria;p__Chloroflexota;c__Anaerolineae;o__4572-78;f__J111;g__J095;s__	Chloroflexi; Ardenticatenia	50.07	2.73	2.923	0.0507303	SAMN30442777
24_May_SF_Bin27	d__Bacteria;p__Chloroflexota;c__Anaerolineae;o__Anaerolineales;f__UBA11579;g__;s__	Chloroflexi	69.09	5.1	2.433	0.044025	SAMN30442867
8_1_July_SF_Bin50	d__Bacteria;p__Chloroflexota;c__Anaerolineae;o__Anaerolineales;f__UBA11579;g__;s__	Chloroflexi	71.62	5.18	3.133	0.0289095	SAMN30443147
8_1_Oct_SF_Bin13	d__Bacteria;p__Chloroflexota;c__Anaerolineae;o__Anaerolineales;f__UBA11579;g__JABJGH01;s__	Chloroflexi	65.7	0.99	2.435	0.0506188	SAMN30443189
4_1_July_SF_Bin1	d__Bacteria;p__Chloroflexota;c__Anaerolineae;o__E26-bin7;f__E26-bin7;g__E26-bin7;s__	Chloroflexi	60.27	8.73	3.738	0.0958764	SAMN30442935
4_1_July_SF_Bin35	d__Bacteria;p__Chloroflexota;c__Anaerolineae;o__UBA7937;f__B3-Chlor;g__B3-Chlor;s__	Chloroflexi	62.48	8.97	2.482	0.040582	SAMN30442951
8_1_Oct_SF_Bin42	d__Bacteria;p__Chloroflexota;c__Dehalococcoidia;o__Dehalococcoidales;f__E44-bin88;g__;s__	Chloroflexi	76.9	6.44	1.73	0.0662523	SAMN30443211
8_1_Jan_SF_Bin41	d__Bacteria;p__Chloroflexota;c__Dehalococcoidia;o__GIF9;f__AB-539-J10;g__20-14-all-45-10;s__	Chloroflexi	77.93	7.89	1.501	0.0347373	SAMN30443082
8_1_Oct_SF_Bin82	d__Bacteria;p__Chloroflexota;c__Dehalococcoidia;o__GIF9;f__AB-539-J10;g__20-14-all-45-10;s__	Chloroflexi	50.77	5.94	0.913	0.0317375	SAMN30443237
4_1_Jan_SF_Bin38	d__Bacteria;p__Chloroflexota;c__Dehalococcoidia;o__GIF9;f__AB-539-J10;g__RBG-13-51-36;s__	Chloroflexi	73.1	2.57	1.399	0.0736819	SAMN30442911
4_1_July_SF_Bin57	d__Bacteria;p__Chloroflexota;c__Dehalococcoidia;o__GIF9;f__AB-539-J10;g__RBG-13-51-36;s__	Chloroflexi	86.11	1.49	1.61	0.0719844	SAMN30442969
4_1_July_SF_Bin62	d__Bacteria;p__Chloroflexota;c__Dehalococcoidia;o__GIF9;f__AB-539-J10;g__RBG-13-51-36;s__	Chloroflexi	82.84	5.06	1.652	0.079197	SAMN30442973
4_1_May_SF_Bin14	d__Bacteria;p__Chloroflexota;c__Dehalococcoidia;o__GIF9;f__AB-539-J10;g__RBG-13-51-36;s__	Chloroflexi	56.07	2.64	1.297	0.0649384	SAMN30442980
4_1_May_SF_Bin29	d__Bacteria;p__Chloroflexota;c__Dehalococcoidia;o__GIF9;f__AB-539-J10;g__RBG-13-51-36;s__	Chloroflexi	71.31	1.77	1.283	0.0697047	SAMN30442983
4_1_Jan_SF_Bin57	d__Bacteria;p__Chloroflexota;c__Limnocylindria;o__Limnocylindrales;f__CSP1-4;g__SPCO01;s__	Chloroflexi	69.65	2.78	2.503	0.0648953	SAMN30442924
4_1_Oct_SF_Bin45	d__Bacteria;p__Chloroflexota;c__Limnocylindria;o__Limnocylindrales;f__CSP1-4;g__SPCO01;s__	Chloroflexi	64.32	3.24	2.444	0.0637883	SAMN30443048
4_1_May_SF_Bin54	d__Bacteria;p__Chloroflexota;c__Limnocylindria;o__QHBO01;f__QHBO01;g__;s__	Chloroflexi	90.11	3.06	1.879	0.0652754	SAMN30443000
13_July_SF_Bin2	d__Bacteria;p__Desulfobacterota_B;c__Binatia;o__UBA9968;f__UBA9968;g__;s__	Proteobacteria; Deltaproteobacteria	61.54	3.55	4.061	0.0257354	SAMN30442644
13_May_SF_Bin19	d__Bacteria;p__Desulfobacterota_E;c__MBNT15;o__J040;f__J040;g__WVXK01;s__	Proteobacteria; Deltaproteobacteria	58.21	5.46	1.357	0.0281845	SAMN30442676
13_July_SF_Bin10	d__Bacteria;p__Desulfobacterota_E;c__MBNT15;o__MBNT15;f__MBNT15;g__CSP1-8;s__	Proteobacteria; Deltaproteobacteria	55.7	3.5	1.767	0.109332	SAMN30442640
13_May_SF_Bin101	d__Bacteria;p__Desulfobacterota_E;c__MBNT15;o__MBNT15;f__MBNT15;g__CSP1-8;s__	Proteobacteria; Deltaproteobacteria	74.73	7.4	2.044	0.135293	SAMN30442671
21_May_SF_Bin32	d__Bacteria;p__Desulfobacterota;c__Desulfobacteria;o__Desulfobacterales;f__;g__;s__	Proteobacteria; Deltaproteobacteria	55.03	6.58	3.459	0.151628	SAMN30442820
24_Jan_SF_Bin12	d__Bacteria;p__Desulfobacterota;c__Desulfobacteria;o__Desulfobacterales;f__;g__;s__	Proteobacteria; Deltaproteobacteria	62.07	7.9	4.191	0.160339	SAMN30442842
24_Jan_SF_Bin10	d__Bacteria;p__Desulfobacterota;c__Desulfobacteria;o__Desulfobacterales;f__SG8-13;g__;s__	Proteobacteria; Deltaproteobacteria	51.07	2.53	3.621	0.126256	SAMN30442841
24_Oct_SF_Bin38	d__Bacteria;p__Desulfobacterota;c__Desulfobacteria;o__Desulfobacterales;f__SURF-15;g__;s__	Proteobacteria; Deltaproteobacteria	50.85	8.84	3.155	0.123765	SAMN30442888
13_Jan_SF_Bin31	d__Bacteria;p__Desulfobacterota;c__Desulfobacteria;o__Desulfobacterales;f__UBA11574;g__JAAXQD01;s__	Proteobacteria; Deltaproteobacteria	53.82	3.87	1.858	0.0705391	SAMN30442620
13_Oct_SF_Bin29	d__Bacteria;p__Desulfobacterota;c__Desulfobacteria;o__Desulfobacterales;f__UBA11574;g__JAAXQD01;s__	Proteobacteria; Deltaproteobacteria	76.74	6.62	2.672	0.08737	SAMN30442742
4_1_July_SF_Bin60	d__Bacteria;p__Desulfobacterota;c__Desulfobacteria;o__Desulfobacterales;f__UBA11574;g__UBA11574;s__	Proteobacteria; Deltaproteobacteria	89.21	5.53	3.459	0.0979507	SAMN30442971
13_Jan_SF_Bin38	d__Bacteria;p__Desulfobacterota;c__Desulfobacteria;o__Desulfobacterales;f__UBA11574;g__UBA11574;s__UBA11574 sp002868985	Proteobacteria; Deltaproteobacteria	81.62	4.68	3.469	0.0459911	SAMN30442623
13_Oct_SF_Bin32	d__Bacteria;p__Desulfobacterota;c__Desulfobacteria;o__Desulfobacterales;f__UBA11574;g__UBA11574;s__UBA11574 sp002868985	Proteobacteria; Deltaproteobacteria	96.13	3.87	4.655	0.0545096	SAMN30442744
21_July_SF_Bin1	d__Bacteria;p__Desulfobacterota;c__Desulfobacteria;o__Desulfobacterales;f__UBA11574;g__UBA11574;s__UBA11574 sp002868985	Proteobacteria; Deltaproteobacteria	94.84	2.58	4.553	0.085052	SAMN30442798
21_May_SF_Bin9	d__Bacteria;p__Desulfobacterota;c__Desulfobacteria;o__Desulfobacterales;f__UBA11574;g__UBA11574;s__UBA11574 sp002868985	Proteobacteria; Deltaproteobacteria	92.58	4.84	4.536	0.0603485	SAMN30442827
21_Oct_SF_Bin17	d__Bacteria;p__Desulfobacterota;c__Desulfobacteria;o__Desulfobacterales;f__UBA11574;g__UBA11574;s__UBA11574 sp002868985	Proteobacteria; Deltaproteobacteria	97.74	4.84	4.095	0.052833	SAMN30442832
24_Jan_SF_Bin13	d__Bacteria;p__Desulfobacterota;c__Desulfobacteria;o__Desulfobacterales;f__UBA11574;g__UBA11574;s__UBA11574 sp002868985	Proteobacteria; Deltaproteobacteria	64.16	3.35	2.566	0.0514345	SAMN30442843
24_May_SF_Bin33	d__Bacteria;p__Desulfobacterota;c__Desulfobacteria;o__Desulfobacterales;f__UBA11574;g__UBA11574;s__UBA11574 sp002868985	Proteobacteria; Deltaproteobacteria	67.03	2.69	2.682	0.0524522	SAMN30442871
21_Oct_SF_Bin14	d__Bacteria;p__Desulfobacterota;c__Desulfobacteria;o__Desulfobacterales;f__UBA2174_A;g__;s__	Proteobacteria; Deltaproteobacteria	52.11	6.8	4.203	0.188887	SAMN30442830
13_Jan_SF_Bin30	d__Bacteria;p__Desulfobacterota;c__Desulfobulbia;o__Desulfobulbales;f__BM004;g__BM004;s__BM004 sp002868955	Proteobacteria; Deltaproteobacteria	82.26	1.41	2.04	0.0647178	SAMN30442619
13_Oct_SF_Bin33	d__Bacteria;p__Desulfobacterota;c__Desulfobulbia;o__Desulfobulbales;f__BM004;g__BM004;s__BM004 sp002868955	Proteobacteria; Deltaproteobacteria	91.37	2.86	2.588	0.0715158	SAMN30442745
21_July_SF_Bin2	d__Bacteria;p__Desulfobacterota;c__Desulfobulbia;o__Desulfobulbales;f__BM004;g__BM004;s__BM004 sp002868955	Proteobacteria; Deltaproteobacteria	62.1	2.03	1.691	0.0644455	SAMN30442805
21_May_SF_Bin30	d__Bacteria;p__Desulfobacterota;c__Desulfobulbia;o__Desulfobulbales;f__BM004;g__BM004;s__BM004 sp002868955	Proteobacteria; Deltaproteobacteria	93.06	1.34	2.713	0.0744405	SAMN30442819
21_Oct_SF_Bin18	d__Bacteria;p__Desulfobacterota;c__Desulfobulbia;o__Desulfobulbales;f__BM004;g__BM004;s__BM004 sp002868955	Proteobacteria; Deltaproteobacteria	83.31	3.17	2.274	0.0657495	SAMN30442833
24_Jan_SF_Bin20	d__Bacteria;p__Desulfobacterota;c__Desulfobulbia;o__Desulfobulbales;f__BM004;g__BM004;s__BM004 sp002868955	Proteobacteria; Deltaproteobacteria	71.26	2.41	1.712	0.063983	SAMN30442846
24_Oct_SF_Bin27	d__Bacteria;p__Desulfobacterota;c__Desulfobulbia;o__Desulfobulbales;f__BM004;g__BM004;s__BM004 sp002868955	Proteobacteria; Deltaproteobacteria	80.92	0.51	1.822	0.063887	SAMN30442883
13_Jan_SF_Bin8	d__Bacteria;p__Desulfobacterota;c__Desulfobulbia;o__Desulfobulbales;f__BM004;g__BM004;s__BM004 sp012974315	Proteobacteria; Deltaproteobacteria	78.22	4.34	2.175	0.145652	SAMN30442638
13_Jan_SF_Bin12	d__Bacteria;p__Desulfobacterota;c__Desulfobulbia;o__Desulfobulbales;f__Desulfobulbaceae;g__;s__	Proteobacteria; Deltaproteobacteria	89.85	8.53	3.225	0.0372101	SAMN30442612
13_Jan_SF_Bin14	d__Bacteria;p__Desulfobacterota;c__Desulfobulbia;o__Desulfobulbales;f__Desulfobulbaceae;g__;s__	Proteobacteria; Deltaproteobacteria	89.1	2.68	4.009	0.0237386	SAMN30442614
4_1_May_SF_Bin4	d__Bacteria;p__Desulfobacterota;c__Desulfobulbia;o__Desulfobulbales;f__Desulfobulbaceae;g__;s__	Proteobacteria; Deltaproteobacteria	75.55	1.19	3.098	0.0270202	SAMN30442991
8_1_July_SF_Bin20	d__Bacteria;p__Desulfobacterota;c__Desulfobulbia;o__Desulfobulbales;f__Desulfurivibrionaceae;g__DUZU01;s__DUZU01 sp013349285	Proteobacteria; Deltaproteobacteria	98.4	0.36	3.629	0.0697325	SAMN30443126
4_1_May_SF_Bin58	d__Bacteria;p__Desulfobacterota;c__Desulfobulbia;o__Desulfobulbales;f__Desulfurivibrionaceae;g__UBA2262;s__UBA2262 sp013349295	Proteobacteria; Deltaproteobacteria	96.96	1.19	3.112	0.0422002	SAMN30443004
13_Jan_SF_Bin49	d__Bacteria;p__Desulfobacterota;c__Desulfobulbia;o__Desulfobulbales;f__Desulfurivibrionaceae;g__UBA5123;s__	Proteobacteria; Deltaproteobacteria	55.9	8.77	1.999	0.043864	SAMN30442629
13_Jan_SF_Bin54	d__Bacteria;p__Desulfobacterota;c__Desulfobulbia;o__Desulfobulbales;f__Desulfurivibrionaceae;g__UBA5123;s__	Proteobacteria; Deltaproteobacteria	54.72	3.79	1.387	0.0257291	SAMN30442633
4_1_May_SF_Bin57	d__Bacteria;p__Desulfobacterota;c__Desulfobulbia;o__Desulfobulbales;f__Desulfurivibrionaceae;g__UBA5123;s__	Proteobacteria; Deltaproteobacteria	90.48	2.81	2.738	0.0713613	SAMN30443003
4_1_May_SF_Bin9	d__Bacteria;p__Desulfobacterota;c__Desulfobulbia;o__Desulfobulbales;f__Desulfurivibrionaceae;g__UBA5123;s__	Proteobacteria; Deltaproteobacteria	73.15	2.08	2.376	0.0389819	SAMN30443018
24_Oct_SF_Bin20	d__Bacteria;p__Desulfobacterota;c__Desulfuromonadia;o__Desulfuromonadales;f__BM103;g__;s__	Proteobacteria; Deltaproteobacteria	67.41	1.94	2.367	0.025686	SAMN30442878
24_Oct_SF_Bin31	d__Bacteria;p__Desulfobacterota;c__Desulfuromonadia;o__Desulfuromonadales;f__BM103;g__;s__	Proteobacteria; Deltaproteobacteria	70.01	2.65	2.537	0.0740845	SAMN30442886
13_Jan_SF_Bin1	d__Bacteria;p__Desulfobacterota;c__Desulfuromonadia;o__Desulfuromonadales;f__BM103;g__M0040;s__	Proteobacteria; Deltaproteobacteria	60	3.77	1.591	0.08146	SAMN30442610
13_Oct_SF_Bin5	d__Bacteria;p__Desulfobacterota;c__Desulfuromonadia;o__Desulfuromonadales;f__BM103;g__M0040;s__	Proteobacteria; Deltaproteobacteria	57.86	1.31	1.843	0.128659	SAMN30442746
21_May_SF_Bin22	d__Bacteria;p__Desulfobacterota;c__Desulfuromonadia;o__Desulfuromonadales;f__BM103;g__M0040;s__	Proteobacteria; Deltaproteobacteria	79.83	3.39	3.1	0.135919	SAMN30442813
24_July_SF_Bin1	d__Bacteria;p__Desulfobacterota;c__Desulfuromonadia;o__Desulfuromonadales;f__BM103;g__M0040;s__	Proteobacteria; Deltaproteobacteria	62.26	1	2.802	0.119834	SAMN30442853
24_May_SF_Bin4	d__Bacteria;p__Desulfobacterota;c__Desulfuromonadia;o__Desulfuromonadales;f__BM103;g__M0040;s__	Proteobacteria; Deltaproteobacteria	55.16	1	2.037	0.123459	SAMN30442872
24_Oct_SF_Bin9	d__Bacteria;p__Desulfobacterota;c__Desulfuromonadia;o__Desulfuromonadales;f__BM103;g__M0040;s__	Proteobacteria; Deltaproteobacteria	88.51	4.22	3.449	0.152159	SAMN30442893
4_1_July_SF_Bin43	d__Bacteria;p__Desulfobacterota;c__GWC2-55-46;o__GWC2-55-46;f__DRQE01;g__;s__	Proteobacteria; Deltaproteobacteria	94.19	0.65	2.143	0.0265424	SAMN30442956
24_May_SF_Bin10	d__Bacteria;p__Desulfobacterota;c__JADFVX01;o__JADFVX01;f__;g__;s__	Proteobacteria; Deltaproteobacteria	97.42	0.65	4.816	0.0412716	SAMN30442863
4_1_July_SF_Bin55	d__Bacteria;p__Desulfobacterota;c__SM23-61;o__SM23-61;f__SM23-61;g__JAHJQK01;s__	Proteobacteria; Deltaproteobacteria	80	2.12	4.567	0.0562232	SAMN30442967
13_Oct_SF_Bin15	d__Bacteria;p__Desulfobacterota;c__Syntrophobacteria;o__BM002;f__BM002;g__BM002;s__BM002 sp002899795	Proteobacteria; Deltaproteobacteria	96	7.33	5.147	0.0889089	SAMN30442736
21_July_SF_Bin16	d__Bacteria;p__Desulfobacterota;c__Syntrophobacteria;o__BM002;f__BM002;g__BM002;s__BM002 sp002899795	Proteobacteria; Deltaproteobacteria	68.96	4.25	2.716	0.0712897	SAMN30442803
21_May_SF_Bin20	d__Bacteria;p__Desulfobacterota;c__Syntrophobacteria;o__BM002;f__BM002;g__BM002;s__BM002 sp002899795	Proteobacteria; Deltaproteobacteria	87.74	4.28	3.395	0.0763474	SAMN30442811
21_Oct_SF_Bin24	d__Bacteria;p__Desulfobacterota;c__Syntrophobacteria;o__BM002;f__BM002;g__BM002;s__BM002 sp002899795	Proteobacteria; Deltaproteobacteria	76.45	6.16	3.5	0.0777014	SAMN30442836
24_Jan_SF_Bin17	d__Bacteria;p__Desulfobacterota;c__Syntrophobacteria;o__BM002;f__BM002;g__BM002;s__BM002 sp002899795	Proteobacteria; Deltaproteobacteria	92.85	5.18	4.358	0.0874155	SAMN30442845
24_July_SF_Bin12	d__Bacteria;p__Desulfobacterota;c__Syntrophobacteria;o__BM002;f__BM002;g__BM002;s__BM002 sp002899795	Proteobacteria; Deltaproteobacteria	93.66	1.31	3.691	0.0769365	SAMN30442855
24_May_SF_Bin32	d__Bacteria;p__Desulfobacterota;c__Syntrophobacteria;o__BM002;f__BM002;g__BM002;s__BM002 sp002899795	Proteobacteria; Deltaproteobacteria	85.33	7.78	3.197	0.0730346	SAMN30442870
24_Oct_SF_Bin1	d__Bacteria;p__Desulfobacterota;c__Syntrophobacteria;o__BM002;f__BM002;g__BM002;s__BM002 sp002899795	Proteobacteria; Deltaproteobacteria	82.53	5.52	3.681	0.0758564	SAMN30442874
4_1_May_SF_Bin68	d__Bacteria;p__Gemmatimonadota;c__Gemmatimonadetes;o__Gemmatimonadales;f__Gemmatimonadaceae;g__PNKF01;s__	Gemmatimonadetes	79.23	1.65	2.737	0.0823087	SAMN30443013
13_May_SF_Bin78	d__Bacteria;p__Gemmatimonadota;c__Gemmatimonadetes;o__Gemmatimonadales;f__GWC2-71-9;g__;s__	Gemmatimonadetes	87.42	3.3	3.491	0.0739014	SAMN30442719
4_1_Jan_SF_Bin35	d__Bacteria;p__Gemmatimonadota;c__Gemmatimonadetes;o__Gemmatimonadales;f__GWC2-71-9;g__;s__	Gemmatimonadetes	73.43	2.9	3.749	0.0363483	SAMN30442909
4_1_Jan_SF_Bin65	d__Bacteria;p__Gemmatimonadota;c__Gemmatimonadetes;o__Gemmatimonadales;f__GWC2-71-9;g__;s__	Gemmatimonadetes	82.5	4.46	2.845	0.0460416	SAMN30442931
4_1_May_SF_Bin31	d__Bacteria;p__Gemmatimonadota;c__Gemmatimonadetes;o__Gemmatimonadales;f__GWC2-71-9;g__;s__	Gemmatimonadetes	58.62	3.95	2.175	0.0394115	SAMN30442985
4_1_May_SF_Bin51	d__Bacteria;p__Gemmatimonadota;c__Gemmatimonadetes;o__Gemmatimonadales;f__GWC2-71-9;g__;s__	Gemmatimonadetes	52.77	1.2	2.783	0.0316386	SAMN30442997
4_1_Oct_SF_Bin18	d__Bacteria;p__Gemmatimonadota;c__Gemmatimonadetes;o__Gemmatimonadales;f__GWC2-71-9;g__;s__	Gemmatimonadetes	76.12	2.7	2.658	0.0414234	SAMN30443024
4_1_Oct_SF_Bin44	d__Bacteria;p__Gemmatimonadota;c__Gemmatimonadetes;o__Gemmatimonadales;f__GWC2-71-9;g__;s__	Gemmatimonadetes	73.63	5.59	3.707	0.0367878	SAMN30443047
8_1_May_SF_Bin5	d__Bacteria;p__Gemmatimonadota;c__Gemmatimonadetes;o__Gemmatimonadales;f__GWC2-71-9;g__;s__	Gemmatimonadetes	57.47	5	1.747	0.0339506	SAMN30443175
8_1_Oct_SF_Bin91	d__Bacteria;p__Gemmatimonadota;c__Gemmatimonadetes;o__Gemmatimonadales;f__GWC2-71-9;g__;s__	Gemmatimonadetes	76.56	5.59	2.533	0.024479	SAMN30443243
4_1_Oct_SF_Bin21	d__Bacteria;p__Gemmatimonadota;c__Gemmatimonadetes;o__Gemmatimonadales;f__GWC2-71-9;g__SZUA-320;s__	Gemmatimonadetes	59.35	4.9	1.702	0.070995	SAMN30443028
13_Jan_SF_Bin53	d__Bacteria;p__Gemmatimonadota;c__Gemmatimonadetes;o__Gemmatimonadales;f__GWC2-71-9;g__WVYX01;s__	Gemmatimonadetes	92.21	2.2	3.588	0.0376126	SAMN30442632
13_July_SF_Bin32	d__Bacteria;p__Gemmatimonadota;c__Gemmatimonadetes;o__Gemmatimonadales;f__GWC2-71-9;g__WVYX01;s__	Gemmatimonadetes	97.8	2.2	3.784	0.0386045	SAMN30442653
13_May_SF_Bin58	d__Bacteria;p__Gemmatimonadota;c__Gemmatimonadetes;o__Gemmatimonadales;f__GWC2-71-9;g__WVYX01;s__	Gemmatimonadetes	98.9	2.2	3.684	0.0375972	SAMN30442705
13_May_SF_Bin79	d__Bacteria;p__Gemmatimonadota;c__Gemmatimonadetes;o__Gemmatimonadales;f__GWC2-71-9;g__WVYX01;s__	Gemmatimonadetes	87.36	6.04	4.249	0.0546169	SAMN30442720
13_Oct_SF_Bin3	d__Bacteria;p__Gemmatimonadota;c__Gemmatimonadetes;o__Gemmatimonadales;f__GWC2-71-9;g__WVYX01;s__	Gemmatimonadetes	88.51	1.46	3.461	0.0366398	SAMN30442743
8_1_July_SF_Bin36	d__Bacteria;p__Gemmatimonadota;c__Gemmatimonadetes;o__Gemmatimonadales;f__GWC2-71-9;g__WVYX01;s__	Gemmatimonadetes	93.41	3.95	3.627	0.03785	SAMN30443137
21_Jan_SF_Bin74	d__Bacteria;p__Gemmatimonadota;c__Gemmatimonadetes;o__KS3-K002;f__JABDQB01;g__;s__	Gemmatimonadetes	74.14	0	3.851	0.0376703	SAMN30442795
13_July_SF_Bin57	d__Bacteria;p__Gemmatimonadota;c__Gemmatimonadetes;o__KS3-K002;f__JABDQB01;g__JAENXO01;s__	Gemmatimonadetes	54.96	1.75	1.432	0.0349178	SAMN30442669
13_May_SF_Bin66	d__Bacteria;p__Gemmatimonadota;c__Gemmatimonadetes;o__KS3-K002;f__JABDQB01;g__JAENXO01;s__	Gemmatimonadetes	80.7	5.07	2.1	0.0450227	SAMN30442712
13_May_SF_Bin3	d__Bacteria;p__Gemmatimonadota;c__Gemmatimonadetes;o__Longimicrobiales;f__UBA6960;g__;s__	Gemmatimonadetes	59.9	1.65	3.4	0.0352929	SAMN30442683
8_1_Oct_SF_Bin61	d__Bacteria;p__Gemmatimonadota;c__Gemmatimonadetes;o__Longimicrobiales;f__UBA6960;g__;s__	Gemmatimonadetes	96.64	3.3	3.943	0.0451884	SAMN30443221
8_1_July_SF_Bin64	d__Bacteria;p__Gemmatimonadota;c__Gemmatimonadetes;o__Longimicrobiales;f__UBA6960;g__SZUA-318;s__	Gemmatimonadetes	62.39	2.2	2.844	0.0353797	SAMN30443158
13_May_SF_Bin45	d__Bacteria;p__Gemmatimonadota;c__Gemmatimonadetes;o__Longimicrobiales;f__UBA6960;g__UBA2589;s__	Gemmatimonadetes	85.81	6.17	3.621	0.05937	SAMN30442695
13_July_SF_Bin5	d__Bacteria;p__Gemmatimonadota;c__Gemmatimonadetes;o__Longimicrobiales;f__UBA6960;g__UBA2982;s__	Gemmatimonadetes	78.79	9.41	3.457	0.0463835	SAMN30442665
13_May_SF_Bin31	d__Bacteria;p__Gemmatimonadota;c__Gemmatimonadetes;o__Longimicrobiales;f__UBA6960;g__UBA2982;s__	Gemmatimonadetes	92.18	2.2	3.903	0.0603156	SAMN30442684
13_May_SF_Bin18	d__Bacteria;p__Krumholzibacteriota;c__Krumholzibacteria;o__WVZY01;f__;g__;s__	Delphibacteria	83.45	2.45	3.677	0.0340649	SAMN30442675
13_May_SF_Bin48	d__Bacteria;p__Krumholzibacteriota;c__Krumholzibacteria;o__WVZY01;f__;g__;s__	Delphibacteria	83.12	6.61	2.833	0.0560751	SAMN30442698
4_1_Jan_SF_Bin19	d__Bacteria;p__Krumholzibacteriota;c__Krumholzibacteria;o__WVZY01;f__;g__;s__	Delphibacteria	97.2	3.3	3.765	0.0527127	SAMN30442899
4_1_May_SF_Bin56	d__Bacteria;p__Krumholzibacteriota;c__Krumholzibacteria;o__WVZY01;f__;g__;s__	Delphibacteria	100	3.3	3.734	0.0529373	SAMN30443002
4_1_Oct_SF_Bin54	d__Bacteria;p__Krumholzibacteriota;c__Krumholzibacteria;o__WVZY01;f__;g__;s__	Delphibacteria	100	3.3	3.798	0.0527873	SAMN30443053
8_1_July_SF_Bin8	d__Bacteria;p__Krumholzibacteriota;c__Krumholzibacteria;o__WVZY01;f__;g__;s__	Delphibacteria	55.49	1.1	1.805	0.0434461	SAMN30443167
13_May_SF_Bin102	d__Bacteria;p__Myxococcota_A;c__UBA9160;o__UBA9160;f__SMWR01;g__;s__	Proteobacteria; Deltaproteobacteria	90.97	4.56	4.144	0.124218	SAMN30442672
13_May_SF_Bin90	d__Bacteria;p__Myxococcota_A;c__UBA9160;o__UBA9160;f__SMWR01;g__;s__	Proteobacteria; Deltaproteobacteria	85.07	1.61	3.33	0.0612464	SAMN30442730
4_1_Oct_SF_Bin12	d__Bacteria;p__Myxococcota_A;c__UBA9160;o__UBA9160;f__SMWR01;g__;s__	Proteobacteria; Deltaproteobacteria	72.17	1.29	2.95	0.0591682	SAMN30443020
8_1_July_SF_Bin58	d__Bacteria;p__Myxococcota_A;c__UBA9160;o__UBA9160;f__SMWR01;g__;s__	Proteobacteria; Deltaproteobacteria	83.55	3.11	3.428	0.0679923	SAMN30443152
21_Jan_SF_Bin49	d__Bacteria;p__Myxococcota_A;c__UBA9160;o__UBA9160;f__UBA6930;g__;s__	Proteobacteria; Deltaproteobacteria	50.49	1.75	3.22	0.0516952	SAMN30442776
8_1_Oct_SF_Bin19	d__Bacteria;p__Myxococcota;c__Polyangia;o__Polyangiales;f__JAFGIB01;g__;s__	Proteobacteria; Deltaproteobacteria	97.42	6.13	8.162	0.0555018	SAMN30443193
13_July_SF_Bin27	d__Bacteria;p__Myxococcota;c__Polyangia;o__Polyangiales;f__SG8-38;g__;s__	Proteobacteria; Deltaproteobacteria	94.95	3.46	4.167	0.0416889	SAMN30442649
13_May_SF_Bin32	d__Bacteria;p__Myxococcota;c__Polyangia;o__Polyangiales;f__SG8-38;g__;s__	Proteobacteria; Deltaproteobacteria	95.27	1.94	4.195	0.0424186	SAMN30442685
21_Jan_SF_Bin46	d__Bacteria;p__Myxococcota;c__Polyangia;o__Polyangiales;f__SG8-38;g__;s__	Proteobacteria; Deltaproteobacteria	94.41	2.58	4.227	0.0392444	SAMN30442773
21_Jan_SF_Bin73	d__Bacteria;p__Myxococcota;c__Polyangia;o__Polyangiales;f__SG8-38;g__;s__	Proteobacteria; Deltaproteobacteria	66.93	6.4	3.41	0.038057	SAMN30442794
21_Oct_SF_Bin11	d__Bacteria;p__Myxococcota;c__Polyangia;o__Polyangiales;f__SG8-38;g__;s__	Proteobacteria; Deltaproteobacteria	78.12	3.94	3.7	0.0338358	SAMN30442828
8_1_July_SF_Bin41	d__Bacteria;p__Myxococcota;c__Polyangia;o__Polyangiales;f__SG8-38;g__;s__	Proteobacteria; Deltaproteobacteria	60.37	2.87	4.047	0.0374619	SAMN30443141
21_Jan_SF_Bin28	d__Bacteria;p__Myxococcota;c__Polyangia;o__Polyangiales;f__SG8-38;g__SG8-38;s__	Proteobacteria; Deltaproteobacteria	93.98	4.84	4.286	0.091124	SAMN30442759
21_May_SF_Bin23	d__Bacteria;p__Myxococcota;c__Polyangia;o__Polyangiales;f__SG8-38;g__SG8-38;s__	Proteobacteria; Deltaproteobacteria	51.6	0.07	2.334	0.140898	SAMN30442814
4_1_May_SF_Bin28	d__Bacteria;p__Myxococcota;c__Polyangia;o__Polyangiales;f__SG8-38;g__SG8-38;s__	Proteobacteria; Deltaproteobacteria	63.84	3.22	2.424	0.0688196	SAMN30442982
13_May_SF_Bin42	d__Bacteria;p__Nitrospinota;c__Nitrospinia;o__Nitrospinales;f__Nitrospinaceae;g__SZUA-226;s__	Nitrospinae	65.33	6.84	1.677	0.105283	SAMN30442693
8_1_Jan_SF_Bin86	d__Bacteria;p__Nitrospinota;c__Nitrospinia;o__Nitrospinales;f__Nitrospinaceae;g__SZUA-226;s__	Nitrospinae	78.1	2.9	2.166	0.175093	SAMN30443116
8_1_Oct_SF_Bin69	d__Bacteria;p__Nitrospinota;c__Nitrospinia;o__Nitrospinales;f__Nitrospinaceae;g__SZUA-226;s__	Nitrospinae	96.34	6.41	3.205	0.0740123	SAMN30443227
8_1_Oct_SF_Bin83	d__Bacteria;p__Nitrospinota;c__Nitrospinia;o__Nitrospinales;f__Nitrospinaceae;g__SZUA-226;s__	Nitrospinae	59.96	0.05	1.484	0.151388	SAMN30443238
8_1_July_SF_Bin34	d__Bacteria;p__Nitrospinota;c__UBA7883;o__JACRGQ01;f__;g__;s__	Nitrospinae	97.72	7.08	2.822	0.0368395	SAMN30443135
4_1_July_SF_Bin3	d__Bacteria;p__Nitrospinota;c__UBA7883;o__UBA7883;f__UBA7883;g__;s__	Nitrospinae	57.23	5.17	2.84	0.0717259	SAMN30442946
8_1_Jan_SF_Bin9	d__Bacteria;p__Nitrospinota;c__UBA7883;o__UBA7883;f__UBA7883;g__;s__	Nitrospinae	74.78	4.02	2.369	0.0302822	SAMN30443119
8_1_July_SF_Bin48	d__Bacteria;p__Nitrospinota;c__UBA7883;o__UBA7883;f__UBA7883;g__;s__	Nitrospinae	90.95	2.78	3.086	0.0297657	SAMN30443146
8_1_May_SF_Bin11	d__Bacteria;p__Nitrospinota;c__UBA7883;o__UBA7883;f__UBA7883;g__;s__	Nitrospinae	93.59	4.49	3.254	0.19008	SAMN30443169
8_1_May_SF_Bin17	d__Bacteria;p__Nitrospinota;c__UBA7883;o__UBA7883;f__UBA7883;g__;s__	Nitrospinae	83.46	6.24	2.739	0.027195	SAMN30443173
8_1_Oct_SF_Bin59	d__Bacteria;p__Nitrospinota;c__UBA7883;o__UBA7883;f__UBA7883;g__;s__	Nitrospinae	91.03	2.74	3.035	0.0369319	SAMN30443220
4_1_Jan_SF_Bin16	d__Bacteria;p__Nitrospirota;c__;o__;f__;g__;s__	Nitrospirae	96.08	8.64	2.776	0.0296903	SAMN30442897
4_1_July_SF_Bin45	d__Bacteria;p__Nitrospirota;c__JACRHL01;o__JACRHL01;f__JACRHL01;g__;s__	Nitrospirae	99.24	0	2.563	0.0868057	SAMN30442957
8_1_July_SF_Bin21	d__Bacteria;p__Nitrospirota;c__JACRHL01;o__JACRHL01;f__JACRHL01;g__;s__	Nitrospirae	98.64	1.36	2.958	0.0542669	SAMN30443127
4_1_Jan_SF_Bin27	d__Bacteria;p__Nitrospirota;c__Nitrospiria;o__Nitrospirales;f__Nitrospiraceae;g__Nitrospira_F;s__	Nitrospirae	95.85	2.83	3.885	0.128375	SAMN30442903
4_1_Jan_SF_Bin41	d__Bacteria;p__Nitrospirota;c__Nitrospiria;o__Nitrospirales;f__Nitrospiraceae;g__Nitrospira_F;s__	Nitrospirae	94.44	3.03	3.574	0.042403	SAMN30442914
4_1_Jan_SF_Bin42	d__Bacteria;p__Nitrospirota;c__Nitrospiria;o__Nitrospirales;f__Nitrospiraceae;g__Nitrospira_F;s__	Nitrospirae	91.99	6.01	3.501	0.0605164	SAMN30442915
4_1_Jan_SF_Bin51	d__Bacteria;p__Nitrospirota;c__Nitrospiria;o__Nitrospirales;f__Nitrospiraceae;g__Nitrospira_F;s__	Nitrospirae	81.34	2.32	2.177	0.0825799	SAMN30442919
4_1_Jan_SF_Bin53	d__Bacteria;p__Nitrospirota;c__Nitrospiria;o__Nitrospirales;f__Nitrospiraceae;g__Nitrospira_F;s__	Nitrospirae	86.16	3.94	3.594	0.101509	SAMN30442920
4_1_July_SF_Bin50	d__Bacteria;p__Nitrospirota;c__Nitrospiria;o__Nitrospirales;f__Nitrospiraceae;g__Nitrospira_F;s__	Nitrospirae	92.22	3.74	3.357	0.0601263	SAMN30442962
4_1_July_SF_Bin51	d__Bacteria;p__Nitrospirota;c__Nitrospiria;o__Nitrospirales;f__Nitrospiraceae;g__Nitrospira_F;s__	Nitrospirae	81.37	4.95	2.22	0.0993784	SAMN30442963
4_1_July_SF_Bin53	d__Bacteria;p__Nitrospirota;c__Nitrospiria;o__Nitrospirales;f__Nitrospiraceae;g__Nitrospira_F;s__	Nitrospirae	95.85	2.83	4.206	0.138027	SAMN30442965
4_1_May_SF_Bin36	d__Bacteria;p__Nitrospirota;c__Nitrospiria;o__Nitrospirales;f__Nitrospiraceae;g__Nitrospira_F;s__	Nitrospirae	85.17	2.73	3.506	0.0995977	SAMN30442989
4_1_May_SF_Bin38	d__Bacteria;p__Nitrospirota;c__Nitrospiria;o__Nitrospirales;f__Nitrospiraceae;g__Nitrospira_F;s__	Nitrospirae	60.65	5.56	1.938	0.113262	SAMN30442990
4_1_May_SF_Bin53	d__Bacteria;p__Nitrospirota;c__Nitrospiria;o__Nitrospirales;f__Nitrospiraceae;g__Nitrospira_F;s__	Nitrospirae	89.03	1.92	3.331	0.0584347	SAMN30442999
4_1_May_SF_Bin59	d__Bacteria;p__Nitrospirota;c__Nitrospiria;o__Nitrospirales;f__Nitrospiraceae;g__Nitrospira_F;s__	Nitrospirae	96.76	2.83	4.123	0.132817	SAMN30443005
4_1_May_SF_Bin6	d__Bacteria;p__Nitrospirota;c__Nitrospiria;o__Nitrospirales;f__Nitrospiraceae;g__Nitrospira_F;s__	Nitrospirae	86.52	5.74	2.877	0.0912531	SAMN30443006
4_1_May_SF_Bin63	d__Bacteria;p__Nitrospirota;c__Nitrospiria;o__Nitrospirales;f__Nitrospiraceae;g__Nitrospira_F;s__	Nitrospirae	94.44	2.78	3.657	0.0432619	SAMN30443008
4_1_Oct_SF_Bin23	d__Bacteria;p__Nitrospirota;c__Nitrospiria;o__Nitrospirales;f__Nitrospiraceae;g__Nitrospira_F;s__	Nitrospirae	94.03	3.96	4.201	0.134515	SAMN30443030
4_1_Oct_SF_Bin26	d__Bacteria;p__Nitrospirota;c__Nitrospiria;o__Nitrospirales;f__Nitrospiraceae;g__Nitrospira_F;s__	Nitrospirae	78.2	2.73	2.781	0.0393214	SAMN30443032
4_1_Oct_SF_Bin30	d__Bacteria;p__Nitrospirota;c__Nitrospiria;o__Nitrospirales;f__Nitrospiraceae;g__Nitrospira_F;s__	Nitrospirae	94.03	8.96	3.526	0.0604596	SAMN30443036
4_1_Oct_SF_Bin52	d__Bacteria;p__Nitrospirota;c__Nitrospiria;o__Nitrospirales;f__Nitrospiraceae;g__Nitrospira_F;s__	Nitrospirae	86.08	4.12	3.612	0.0995549	SAMN30443052
4_1_Oct_SF_Bin9	d__Bacteria;p__Nitrospirota;c__Nitrospiria;o__Nitrospirales;f__Nitrospiraceae;g__Nitrospira_F;s__	Nitrospirae	77.99	1.94	2.38	0.0812372	SAMN30443056
8_1_July_SF_Bin45	d__Bacteria;p__Nitrospirota;c__Nitrospiria;o__Nitrospirales;f__Nitrospiraceae;g__Nitrospira_F;s__	Nitrospirae	95.55	2.83	3.727	0.0464338	SAMN30443143
8_1_July_SF_Bin71	d__Bacteria;p__Nitrospirota;c__Nitrospiria;o__Nitrospirales;f__Nitrospiraceae;g__Nitrospira_F;s__	Nitrospirae	72.71	6.65	2.1	0.0968416	SAMN30443165
8_1_May_SF_Bin16	d__Bacteria;p__Nitrospirota;c__Nitrospiria;o__Nitrospirales;f__Nitrospiraceae;g__Nitrospira_F;s__	Nitrospirae	61.81	7.78	2.887	0.187329	SAMN30443172
8_1_Oct_SF_Bin26	d__Bacteria;p__Nitrospirota;c__Nitrospiria;o__Nitrospirales;f__Nitrospiraceae;g__Nitrospira_F;s__	Nitrospirae	84.41	5.56	3.376	0.0487293	SAMN30443198
8_1_Oct_SF_Bin54	d__Bacteria;p__Nitrospirota;c__Nitrospiria;o__Nitrospirales;f__Nitrospiraceae;g__Nitrospira_F;s__	Nitrospirae	96.76	6.09	4.145	0.0373543	SAMN30443217
8_1_Oct_SF_Bin63	d__Bacteria;p__Nitrospirota;c__Nitrospiria;o__Nitrospirales;f__Nitrospiraceae;g__Nitrospira_F;s__	Nitrospirae	82.22	8.97	3.062	0.0665938	SAMN30443223
4_1_July_SF_Bin24	d__Bacteria;p__Nitrospirota;c__Nitrospiria;o__Nitrospirales;f__Nitrospiraceae;g__Palsa-1315;s__	Nitrospirae	74.18	3.94	3.009	0.0347781	SAMN30442941
13_July_SF_Bin24	d__Bacteria;p__Nitrospirota;c__Nitrospiria;o__Nitrospirales;f__UBA8639;g__UBA8639;s__	Nitrospirae	59.81	0	2.885	0.0701918	SAMN30442647
21_July_SF_Bin14	d__Bacteria;p__Nitrospirota;c__Nitrospiria;o__Nitrospirales;f__UBA8639;g__UBA8639;s__	Nitrospirae	55.91	9.86	2.715	0.157783	SAMN30442802
4_1_Jan_SF_Bin63	d__Bacteria;p__Nitrospirota;c__Nitrospiria;o__Nitrospirales;f__UBA8639;g__UBA8639;s__	Nitrospirae	90.8	9.18	3.389	0.0384612	SAMN30442929
4_1_May_SF_Bin33	d__Bacteria;p__Nitrospirota;c__Nitrospiria;o__Nitrospirales;f__UBA8639;g__UBA8639;s__	Nitrospirae	90.8	7.73	3.458	0.036921	SAMN30442986
4_1_Oct_SF_Bin11	d__Bacteria;p__Nitrospirota;c__Nitrospiria;o__Nitrospirales;f__UBA8639;g__UBA8639;s__	Nitrospirae	59.43	3.41	1.798	0.0294222	SAMN30443019
8_1_Jan_SF_Bin68	d__Bacteria;p__Nitrospirota;c__Nitrospiria;o__Nitrospirales;f__UBA8639;g__UBA8639;s__	Nitrospirae	90.93	9.02	3.678	0.0757186	SAMN30443105
8_1_July_SF_Bin60	d__Bacteria;p__Nitrospirota;c__Nitrospiria;o__Nitrospirales;f__UBA8639;g__UBA8639;s__	Nitrospirae	70.69	0.91	3.07	0.113374	SAMN30443154
8_1_July_SF_Bin61	d__Bacteria;p__Nitrospirota;c__Nitrospiria;o__Nitrospirales;f__UBA8639;g__UBA8639;s__	Nitrospirae	71.05	7.27	3.022	0.0426327	SAMN30443155
8_1_July_SF_Bin63	d__Bacteria;p__Nitrospirota;c__Nitrospiria;o__Nitrospirales;f__UBA8639;g__UBA8639;s__	Nitrospirae	82.44	7.92	3.446	0.0677892	SAMN30443157
8_1_Oct_SF_Bin49	d__Bacteria;p__Nitrospirota;c__Nitrospiria;o__Nitrospirales;f__UBA8639;g__UBA8639;s__	Nitrospirae	76.84	0.91	2.783	0.064522	SAMN30443214
8_1_Oct_SF_Bin74	d__Bacteria;p__Nitrospirota;c__Nitrospiria;o__Nitrospirales;f__UBA8639;g__UBA8639;s__	Nitrospirae	80.55	4.6	3.219	0.0662305	SAMN30443231
8_1_Jan_SF_Bin13	d__Bacteria;p__Nitrospirota;c__Thermodesulfovibrionia;o__Thermodesulfovibrionales;f__SM23-35;g__VGWZ01;s__	Nitrospirae	79.56	4.55	2.231	0.0238814	SAMN30443065
8_1_Oct_SF_Bin79	d__Bacteria;p__Nitrospirota;c__Thermodesulfovibrionia;o__Thermodesulfovibrionales;f__SM23-35;g__VGWZ01;s__	Nitrospirae	83.79	4.32	2.16	0.0222966	SAMN30443233
4_1_July_SF_Bin47	d__Bacteria;p__Nitrospirota;c__Thermodesulfovibrionia;o__Thermodesulfovibrionales;f__UBA6898;g__GW-Nitrospira-1;s__	Nitrospirae	89.9	3.64	3.04	0.0264313	SAMN30442959
4_1_Jan_SF_Bin13	d__Bacteria;p__Nitrospirota;c__Thermodesulfovibrionia;o__UBA6902;f__UBA6902;g__;s__	Nitrospirae	63.49	2.73	1.817	0.0397413	SAMN30442895
4_1_July_SF_Bin20	d__Bacteria;p__Nitrospirota;c__UBA9217;o__UBA9217;f__UBA9217;g__;s__	Nitrospirae	98.64	0.3	3.918	0.0401245	SAMN30442939
13_Jan_SF_Bin21	d__Bacteria;p__Patescibacteria;c__Gracilibacteria;o__UBA4473;f__UBA4473;g__;s__	Peregrinibacteria	58.91	2.27	1.028	0.0247052	SAMN30442616
8_1_Oct_SF_Bin107	d__Bacteria;p__Patescibacteria;c__Gracilibacteria;o__UM-FILTER-43-11;f__UM-FILTER-43-11;g__;s__	Peregrinibacteria	60.38	7.65	0.961	0.0177301	SAMN30443185
8_1_July_SF_Bin25	d__Bacteria;p__Patescibacteria;c__Microgenomatia;o__UBA1400;f__PJMF01;g__;s__	Pacebacteria	64.96	2.14	1.083	0.025319	SAMN30443129
4_1_May_SF_Bin64	d__Bacteria;p__Patescibacteria;c__Paceibacteria;o__Moranbacterales;f__UBA9337;g__;s__	Moranbacteria	72.57	2.57	1.027	0.0308425	SAMN30443009
8_1_Jan_SF_Bin80	d__Bacteria;p__Patescibacteria;c__Paceibacteria;o__UBA9983_A;f__UBA1006;g__;s__	Nomurabacteria	76.15	1.72	0.652	0.0274491	SAMN30443112
4_1_July_SF_Bin64	d__Bacteria;p__Patescibacteria;c__UBA1384;o__UBA1384;f__DTJR01;g__;s__	Berkelbacteria	68.15	0	0.794	0.0269504	SAMN30442974
21_Jan_SF_Bin11	d__Bacteria;p__Planctomycetota;c__Phycisphaerae;o__Phycisphaerales;f__Zrk34;g__;s__	Planctomycetes	65.05	1.24	2.996	0.0405969	SAMN30442750
4_1_July_SF_Bin34	d__Bacteria;p__Planctomycetota;c__Phycisphaerae;o__Sedimentisphaerales;f__Anaerohalosphaeraceae;g__4572-13;s__	Planctomycetes	97.73	0	3.01	0.0638112	SAMN30442950
4_1_July_SF_Bin52	d__Bacteria;p__Planctomycetota;c__Phycisphaerae;o__Sedimentisphaerales;f__SG8-4;g__CS2-K091;s__	Planctomycetes	87.15	3.51	4.834	0.053677	SAMN30442964
21_Jan_SF_Bin2	d__Bacteria;p__Planctomycetota;c__PLA2;o__PLA2;f__PLA2;g__;s__	Planctomycetes	50.91	7.35	2.836	0.0450212	SAMN30442754
21_Jan_SF_Bin71	d__Bacteria;p__Planctomycetota;c__Planctomycetia;o__Pirellulales;f__UBA7805;g__CS4-C045;s__	Planctomycetes	68.44	0	3.693	0.0548443	SAMN30442792
13_May_SF_Bin40	d__Bacteria;p__Proteobacteria;c__Alphaproteobacteria;o__Bin65;f__;g__;s__	Proteobacteria; Alphaproteobacteria	88.88	9.45	4.825	0.0614297	SAMN30442691
21_Jan_SF_Bin24	d__Bacteria;p__Proteobacteria;c__Alphaproteobacteria;o__Geminicoccales;f__Geminicoccaceae;g__CADEGR01;s__	Proteobacteria; Alphaproteobacteria	84.78	7.31	6.904	0.0419197	SAMN30442757
13_May_SF_Bin81	d__Bacteria;p__Proteobacteria;c__Alphaproteobacteria;o__Kiloniellales;f__J153;g__;s__	Proteobacteria; Alphaproteobacteria	87.02	7.72	4.617	0.0858846	SAMN30442723
21_Jan_SF_Bin10	d__Bacteria;p__Proteobacteria;c__Alphaproteobacteria;o__Kiloniellales;f__J153;g__;s__	Proteobacteria; Alphaproteobacteria	91.68	4.65	4.792	0.0414651	SAMN30442749
21_May_SF_Bin33	d__Bacteria;p__Proteobacteria;c__Alphaproteobacteria;o__Kiloniellales;f__J153;g__;s__	Proteobacteria; Alphaproteobacteria	62.64	1.3	3.083	0.0380023	SAMN30442821
24_Jan_SF_Bin23	d__Bacteria;p__Proteobacteria;c__Alphaproteobacteria;o__Kiloniellales;f__J153;g__;s__	Proteobacteria; Alphaproteobacteria	90.94	5.89	4.895	0.0421035	SAMN30442847
24_July_SF_Bin17	d__Bacteria;p__Proteobacteria;c__Alphaproteobacteria;o__Kiloniellales;f__J153;g__;s__	Proteobacteria; Alphaproteobacteria	72.77	8.07	4.467	0.0395718	SAMN30442857
24_Oct_SF_Bin19	d__Bacteria;p__Proteobacteria;c__Alphaproteobacteria;o__Kiloniellales;f__J153;g__;s__	Proteobacteria; Alphaproteobacteria	95.72	4.17	5.358	0.0442822	SAMN30442877
8_1_Oct_SF_Bin23	d__Bacteria;p__Proteobacteria;c__Alphaproteobacteria;o__Micavibrionales;f__Micavibrionaceae;g__UBA1672;s__	Proteobacteria; Alphaproteobacteria	95.01	1.88	2.15	0.0192306	SAMN30443195
21_Jan_SF_Bin9	d__Bacteria;p__Proteobacteria;c__Alphaproteobacteria;o__Rhizobiales;f__Aestuariivirgaceae;g__JABDJG01;s__	Proteobacteria; Alphaproteobacteria	54.26	1.34	3.225	0.0593384	SAMN30442797
13_July_SF_Bin6	d__Bacteria;p__Proteobacteria;c__Alphaproteobacteria;o__Rhizobiales;f__Afifellaceae;g__;s__	Proteobacteria; Alphaproteobacteria	50.22	3.36	1.67	0.16323	SAMN30442670
21_Jan_SF_Bin12	d__Bacteria;p__Proteobacteria;c__Alphaproteobacteria;o__Rhizobiales;f__Methyloligellaceae;g__;s__	Proteobacteria; Alphaproteobacteria	75.07	9.76	3.315	0.0357665	SAMN30442751
8_1_Jan_SF_Bin88	d__Bacteria;p__Proteobacteria;c__Alphaproteobacteria;o__Rhodobacterales;f__Rhodobacteraceae;g__Albidovulum;s__	Proteobacteria; Alphaproteobacteria	52.83	1.75	2.227	0.0327495	SAMN30443117
8_1_July_SF_Bin31	d__Bacteria;p__Proteobacteria;c__Alphaproteobacteria;o__Rhodobacterales;f__Rhodobacteraceae;g__Albidovulum;s__	Proteobacteria; Alphaproteobacteria	80.64	2.64	3.143	0.038517	SAMN30443132
21_Jan_SF_Bin22	d__Bacteria;p__Proteobacteria;c__Alphaproteobacteria;o__Rhodobacterales;f__Rhodobacteraceae;g__Limibaculum;s__	Proteobacteria; Alphaproteobacteria	97.5	0.8	4.44	0.0612403	SAMN30442755
8_1_Oct_SF_Bin92	d__Bacteria;p__Proteobacteria;c__Alphaproteobacteria;o__Rhodobacterales;f__Rhodobacteraceae;g__S012-89;s__	Proteobacteria; Alphaproteobacteria	56.54	2.87	1.893	0.0397697	SAMN30443244
13_May_SF_Bin5	d__Bacteria;p__Proteobacteria;c__Alphaproteobacteria;o__Rhodobacterales;f__Rhodobacteraceae;g__UBA996;s__	Proteobacteria; Alphaproteobacteria	76	1.42	2.661	0.0881747	SAMN30442699
8_1_Oct_SF_Bin68	d__Bacteria;p__Proteobacteria;c__Alphaproteobacteria;o__Rhodospirillales;f__2-02-FULL-58-16;g__;s__	Proteobacteria; Alphaproteobacteria	79.53	4.2	2.967	0.0317342	SAMN30443226
13_Jan_SF_Bin10	d__Bacteria;p__Proteobacteria;c__Alphaproteobacteria;o__Rhodospirillales;f__Magnetovibrionaceae;g__;s__	Proteobacteria; Alphaproteobacteria	55.12	1.27	1.034	0.0323622	SAMN30442611
8_1_Jan_SF_Bin18	d__Bacteria;p__Proteobacteria;c__Alphaproteobacteria;o__Rhodospirillales;f__Magnetovibrionaceae;g__;s__	Proteobacteria; Alphaproteobacteria	88.06	4.51	2.108	0.0416267	SAMN30443068
8_1_Jan_SF_Bin95	d__Bacteria;p__Proteobacteria;c__Alphaproteobacteria;o__Rhodospirillales;f__Magnetovibrionaceae;g__;s__	Proteobacteria; Alphaproteobacteria	89.6	6.12	1.865	0.0917634	SAMN30443121
8_1_Oct_SF_Bin8	d__Bacteria;p__Proteobacteria;c__Alphaproteobacteria;o__Rhodospirillales;f__Magnetovibrionaceae;g__;s__	Proteobacteria; Alphaproteobacteria	55.86	7.76	1.612	0.0659828	SAMN30443234
8_1_Oct_SF_Bin90	d__Bacteria;p__Proteobacteria;c__Alphaproteobacteria;o__Rickettsiales;f__Anaplasmataceae;g__;s__	Proteobacteria; Alphaproteobacteria	73.11	1.46	0.938	0.0341086	SAMN30443242
13_May_SF_Bin34	d__Bacteria;p__Proteobacteria;c__Alphaproteobacteria;o__SMXQ01;f__SMXQ01;g__SMXQ01;s__	Proteobacteria; Alphaproteobacteria	94.35	6.3	4.093	0.065712	SAMN30442686
21_Jan_SF_Bin60	d__Bacteria;p__Proteobacteria;c__Alphaproteobacteria;o__UBA6615;f__UBA6615;g__JABDJY01;s__	Proteobacteria; Alphaproteobacteria	51.09	3.04	2.122	0.0471011	SAMN30442787
13_May_SF_Bin13	d__Bacteria;p__Proteobacteria;c__Alphaproteobacteria;o__UBA8366;f__JADFVY01;g__JADFVY01;s__	Proteobacteria; Alphaproteobacteria	87.39	8.3	3.819	0.156637	SAMN30442674
8_1_Jan_SF_Bin60	d__Bacteria;p__Proteobacteria;c__Alphaproteobacteria;o__UBA8366;f__JADFVY01;g__JADFVY01;s__	Proteobacteria; Alphaproteobacteria	69.22	3.82	2.319	0.0883564	SAMN30443099
8_1_July_SF_Bin3	d__Bacteria;p__Proteobacteria;c__Alphaproteobacteria;o__UBA8366;f__JADFVY01;g__JADFVY01;s__	Proteobacteria; Alphaproteobacteria	77.88	1.2	3.238	0.0995241	SAMN30443131
21_Jan_SF_Bin55	d__Bacteria;p__Proteobacteria;c__Alphaproteobacteria;o__UBA8366;f__UBA8366;g__WHUA01;s__	Proteobacteria; Alphaproteobacteria	92.9	3.19	4.85	0.0566139	SAMN30442783
21_Jan_SF_Bin47	d__Bacteria;p__Proteobacteria;c__Gammaproteobacteria;o__Acidiferrobacterales;f__SPGG2;g__SPGG2;s__	Proteobacteria; Gammaproteobacteria	92.38	2.44	4.466	0.0303115	SAMN30442774
13_Jan_SF_Bin62	d__Bacteria;p__Proteobacteria;c__Gammaproteobacteria;o__Acidiferrobacterales;f__Sulfurifustaceae;g__Sulfuricaulis;s__	Proteobacteria; Gammaproteobacteria	83.18	2.68	1.849	0.0328048	SAMN30442636
13_July_SF_Bin52	d__Bacteria;p__Proteobacteria;c__Gammaproteobacteria;o__Acidiferrobacterales;f__Sulfurifustaceae;g__Sulfuricaulis;s__	Proteobacteria; Gammaproteobacteria	94.39	2.54	2.37	0.035095	SAMN30442667
13_May_SF_Bin71	d__Bacteria;p__Proteobacteria;c__Gammaproteobacteria;o__Acidiferrobacterales;f__Sulfurifustaceae;g__Sulfuricaulis;s__	Proteobacteria; Gammaproteobacteria	95.02	3.56	2.454	0.0371072	SAMN30442715
13_May_SF_Bin88	d__Bacteria;p__Proteobacteria;c__Gammaproteobacteria;o__Acidiferrobacterales;f__Sulfurifustaceae;g__Sulfuricaulis;s__	Proteobacteria; Gammaproteobacteria	60.92	3.73	1.74	0.0522733	SAMN30442727
13_Oct_SF_Bin7	d__Bacteria;p__Proteobacteria;c__Gammaproteobacteria;o__Acidiferrobacterales;f__Sulfurifustaceae;g__Sulfuricaulis;s__	Proteobacteria; Gammaproteobacteria	79.71	2.91	1.966	0.0400636	SAMN30442747
8_1_July_SF_Bin13	d__Bacteria;p__Proteobacteria;c__Gammaproteobacteria;o__Acidiferrobacterales;f__Sulfurifustaceae;g__Sulfuricaulis;s__	Proteobacteria; Gammaproteobacteria	59.06	4.12	1.721	0.0527334	SAMN30443125
8_1_July_SF_Bin39	d__Bacteria;p__Proteobacteria;c__Gammaproteobacteria;o__Acidiferrobacterales;f__Sulfurifustaceae;g__Sulfuricaulis;s__	Proteobacteria; Gammaproteobacteria	92.44	3.35	2.305	0.0347994	SAMN30443139
8_1_May_SF_Bin19	d__Bacteria;p__Proteobacteria;c__Gammaproteobacteria;o__Acidiferrobacterales;f__SZUA-150;g__;s__	Proteobacteria; Gammaproteobacteria	68.5	3.3	2.13	0.0341504	SAMN30443174
8_1_Oct_SF_Bin102	d__Bacteria;p__Proteobacteria;c__Gammaproteobacteria;o__Acidiferrobacterales;f__SZUA-150;g__;s__	Proteobacteria; Gammaproteobacteria	96.95	1.83	2.958	0.0680486	SAMN30443181
4_1_July_SF_Bin12	d__Bacteria;p__Proteobacteria;c__Gammaproteobacteria;o__Acidiferrobacterales;f__UBA6901;g__UBA6901;s__	Proteobacteria; Gammaproteobacteria	60.24	9.04	1.676	0.0490567	SAMN30442936
8_1_Jan_SF_Bin19	d__Bacteria;p__Proteobacteria;c__Gammaproteobacteria;o__AKS1;f__AKS1;g__;s__	Proteobacteria; Gammaproteobacteria	94.82	2.49	2.421	0.0816313	SAMN30443069
8_1_Jan_SF_Bin75	d__Bacteria;p__Proteobacteria;c__Gammaproteobacteria;o__AKS1;f__AKS1;g__;s__	Proteobacteria; Gammaproteobacteria	77.43	4.99	1.898	0.034132	SAMN30443109
8_1_July_SF_Bin70	d__Bacteria;p__Proteobacteria;c__Gammaproteobacteria;o__AKS1;f__AKS1;g__;s__	Proteobacteria; Gammaproteobacteria	57.77	1.69	1.294	0.0571253	SAMN30443164
8_1_Oct_SF_Bin104	d__Bacteria;p__Proteobacteria;c__Gammaproteobacteria;o__AKS1;f__AKS1;g__;s__	Proteobacteria; Gammaproteobacteria	88.97	5.41	2.206	0.0682067	SAMN30443183
13_July_SF_Bin1	d__Bacteria;p__Proteobacteria;c__Gammaproteobacteria;o__Arenicellales;f__;g__;s__	Proteobacteria; Gammaproteobacteria	85.79	9.76	5.622	0.0298205	SAMN30442639
13_May_SF_Bin80	d__Bacteria;p__Proteobacteria;c__Gammaproteobacteria;o__Arenicellales;f__;g__;s__	Proteobacteria; Gammaproteobacteria	96.15	5.89	5.535	0.0316812	SAMN30442722
21_Jan_SF_Bin52	d__Bacteria;p__Proteobacteria;c__Gammaproteobacteria;o__Arenicellales;f__;g__;s__	Proteobacteria; Gammaproteobacteria	90.82	7.7	5.149	0.0275997	SAMN30442780
13_May_SF_Bin64	d__Bacteria;p__Proteobacteria;c__Gammaproteobacteria;o__Arenicellales;f__JAANXG01;g__;s__	Proteobacteria; Gammaproteobacteria	64.91	3.69	3.413	0.0365141	SAMN30442710
21_Jan_SF_Bin39	d__Bacteria;p__Proteobacteria;c__Gammaproteobacteria;o__Arenicellales;f__JAANXG01;g__;s__	Proteobacteria; Gammaproteobacteria	77.69	3.39	3.459	0.026719	SAMN30442767
21_Jan_SF_Bin54	d__Bacteria;p__Proteobacteria;c__Gammaproteobacteria;o__Arenicellales;f__RKSH01;g__;s__	Proteobacteria; Gammaproteobacteria	56	1.93	2.61	0.0270746	SAMN30442782
13_Jan_SF_Bin46	d__Bacteria;p__Proteobacteria;c__Gammaproteobacteria;o__BM003;f__BM003;g__;s__	Proteobacteria; Gammaproteobacteria	91.91	2.54	2.783	0.0658252	SAMN30442628
21_May_SF_Bin35	d__Bacteria;p__Proteobacteria;c__Gammaproteobacteria;o__BM003;f__BM003;g__BM003;s__BM003 sp002868855	Proteobacteria; Gammaproteobacteria	64.13	6.7	2.882	0.0526411	SAMN30442822
24_Jan_SF_Bin9	d__Bacteria;p__Proteobacteria;c__Gammaproteobacteria;o__BM003;f__BM003;g__BM003;s__BM003 sp002868855	Proteobacteria; Gammaproteobacteria	69.72	2.83	2.687	0.05058	SAMN30442852
24_July_SF_Bin15	d__Bacteria;p__Proteobacteria;c__Gammaproteobacteria;o__BM003;f__BM003;g__BM003;s__BM003 sp002868855	Proteobacteria; Gammaproteobacteria	69.64	5.6	2.836	0.0513007	SAMN30442856
24_May_SF_Bin28	d__Bacteria;p__Proteobacteria;c__Gammaproteobacteria;o__BM003;f__BM003;g__BM003;s__BM003 sp002868855	Proteobacteria; Gammaproteobacteria	54.99	2.98	2.144	0.0579004	SAMN30442868
24_Oct_SF_Bin25	d__Bacteria;p__Proteobacteria;c__Gammaproteobacteria;o__BM003;f__BM003;g__BM003;s__BM003 sp002868855	Proteobacteria; Gammaproteobacteria	84.81	6.03	3.311	0.0540678	SAMN30442881
4_1_Jan_SF_Bin64	d__Bacteria;p__Proteobacteria;c__Gammaproteobacteria;o__Burkholderiales;f__Burkholderiaceae;g__;s__	Proteobacteria; Betaproteobacteria	59.82	2.51	1.732	0.061084	SAMN30442930
4_1_Oct_SF_Bin51	d__Bacteria;p__Proteobacteria;c__Gammaproteobacteria;o__Burkholderiales;f__Burkholderiaceae;g__;s__	Proteobacteria; Betaproteobacteria	87.96	3.5	3.027	0.0801042	SAMN30443051
4_1_Jan_SF_Bin33	d__Bacteria;p__Proteobacteria;c__Gammaproteobacteria;o__Burkholderiales;f__Burkholderiaceae;g__CADEEN01;s__	Proteobacteria; Betaproteobacteria	77.1	2.52	3.304	0.04772	SAMN30442907
4_1_May_SF_Bin30	d__Bacteria;p__Proteobacteria;c__Gammaproteobacteria;o__Burkholderiales;f__Burkholderiaceae;g__CADEEN01;s__	Proteobacteria; Betaproteobacteria	91.18	3.31	3.688	0.0482027	SAMN30442984
4_1_Oct_SF_Bin28	d__Bacteria;p__Proteobacteria;c__Gammaproteobacteria;o__Burkholderiales;f__Burkholderiaceae;g__CADEEN01;s__	Proteobacteria; Betaproteobacteria	88.91	1.99	3.817	0.0505705	SAMN30443034
13_July_SF_Bin36	d__Bacteria;p__Proteobacteria;c__Gammaproteobacteria;o__Burkholderiales;f__Burkholderiaceae;g__CAIKUF01;s__	Proteobacteria; Betaproteobacteria	81.01	3.25	2.645	0.059653	SAMN30442657
13_May_SF_Bin38	d__Bacteria;p__Proteobacteria;c__Gammaproteobacteria;o__Burkholderiales;f__Burkholderiaceae;g__CAIKUF01;s__	Proteobacteria; Betaproteobacteria	68.8	1.28	2.014	0.048454	SAMN30442689
8_1_Jan_SF_Bin107	d__Bacteria;p__Proteobacteria;c__Gammaproteobacteria;o__Burkholderiales;f__Burkholderiaceae;g__Hylemonella;s__	Proteobacteria; Betaproteobacteria	81.4	6.26	2.623	0.0534234	SAMN30443062
8_1_Oct_SF_Bin56	d__Bacteria;p__Proteobacteria;c__Gammaproteobacteria;o__Burkholderiales;f__Burkholderiaceae;g__Hylemonella;s__	Proteobacteria; Betaproteobacteria	75.96	1.78	2.326	0.0504024	SAMN30443219
8_1_July_SF_Bin24	d__Bacteria;p__Proteobacteria;c__Gammaproteobacteria;o__Burkholderiales;f__Burkholderiaceae;g__LMDS01;s__	Proteobacteria; Betaproteobacteria	54.2	9.38	3.382	0.0874902	SAMN30443128
4_1_Jan_SF_Bin28	d__Bacteria;p__Proteobacteria;c__Gammaproteobacteria;o__Burkholderiales;f__Burkholderiaceae;g__Rubrivivax;s__	Proteobacteria; Betaproteobacteria	72.56	6	3.57	0.075844	SAMN30442904
4_1_Oct_SF_Bin31	d__Bacteria;p__Proteobacteria;c__Gammaproteobacteria;o__Burkholderiales;f__Burkholderiaceae;g__Rubrivivax;s__	Proteobacteria; Betaproteobacteria	66.34	2.86	2.824	0.0697151	SAMN30443037
4_1_Oct_SF_Bin49	d__Bacteria;p__Proteobacteria;c__Gammaproteobacteria;o__Burkholderiales;f__Casimicrobiaceae;g__CAIWHR01;s__	Proteobacteria; Betaproteobacteria	52.86	7.93	2.358	0.0855697	SAMN30443049
4_1_Jan_SF_Bin8	d__Bacteria;p__Proteobacteria;c__Gammaproteobacteria;o__Burkholderiales;f__Casimicrobiaceae;g__VBCG01;s__	Proteobacteria; Betaproteobacteria	53.27	5.33	2.029	0.0662117	SAMN30442934
4_1_Oct_SF_Bin16	d__Bacteria;p__Proteobacteria;c__Gammaproteobacteria;o__Burkholderiales;f__Casimicrobiaceae;g__VBCG01;s__	Proteobacteria; Betaproteobacteria	91.97	0.43	3.66	0.0952092	SAMN30443022
4_1_July_SF_Bin49	d__Bacteria;p__Proteobacteria;c__Gammaproteobacteria;o__Burkholderiales;f__Gallionellaceae;g__Gallionella;s__	Proteobacteria; Betaproteobacteria	65.86	6.9	1.917	0.0791146	SAMN30442961
4_1_July_SF_Bin6	d__Bacteria;p__Proteobacteria;c__Gammaproteobacteria;o__Burkholderiales;f__Gallionellaceae;g__Gallionella;s__	Proteobacteria; Betaproteobacteria	66.1	2.21	1.734	0.0956186	SAMN30442970
4_1_May_SF_Bin13	d__Bacteria;p__Proteobacteria;c__Gammaproteobacteria;o__Burkholderiales;f__Gallionellaceae;g__Gallionella;s__	Proteobacteria; Betaproteobacteria	50.11	2.91	1.174	0.0926965	SAMN30442979
4_1_May_SF_Bin26	d__Bacteria;p__Proteobacteria;c__Gammaproteobacteria;o__Burkholderiales;f__Gallionellaceae;g__VIKH01;s__	Proteobacteria; Betaproteobacteria	67.89	9.6	1.963	0.0568883	SAMN30442981
8_1_Jan_SF_Bin93	d__Bacteria;p__Proteobacteria;c__Gammaproteobacteria;o__Burkholderiales;f__Nitrosomonadaceae;g__Nitrosomonas;s__	Proteobacteria; Betaproteobacteria	86.95	3.49	2.012	0.0385743	SAMN30443120
8_1_July_SF_Bin37	d__Bacteria;p__Proteobacteria;c__Gammaproteobacteria;o__Burkholderiales;f__Nitrosomonadaceae;g__Nitrosomonas;s__	Proteobacteria; Betaproteobacteria	68.97	1.73	1.748	0.0437739	SAMN30443138
13_May_SF_Bin7	d__Bacteria;p__Proteobacteria;c__Gammaproteobacteria;o__Burkholderiales;f__SG8-39;g__JAABQT01;s__	Proteobacteria; Betaproteobacteria	90.07	0.78	3.066	0.0912186	SAMN30442714
4_1_Jan_SF_Bin40	d__Bacteria;p__Proteobacteria;c__Gammaproteobacteria;o__Burkholderiales;f__SG8-39;g__JAABQT01;s__	Proteobacteria; Betaproteobacteria	92.38	1.87	3.265	0.0492935	SAMN30442913
4_1_Jan_SF_Bin54	d__Bacteria;p__Proteobacteria;c__Gammaproteobacteria;o__Burkholderiales;f__SG8-39;g__JAABQT01;s__	Proteobacteria; Betaproteobacteria	84.33	6.3	3.264	0.068836	SAMN30442921
4_1_May_SF_Bin49	d__Bacteria;p__Proteobacteria;c__Gammaproteobacteria;o__Burkholderiales;f__SG8-39;g__JAABQT01;s__	Proteobacteria; Betaproteobacteria	89.91	6.07	3.795	0.0722927	SAMN30442995
4_1_May_SF_Bin65	d__Bacteria;p__Proteobacteria;c__Gammaproteobacteria;o__Burkholderiales;f__SG8-39;g__JAABQT01;s__	Proteobacteria; Betaproteobacteria	95.98	1.62	3.374	0.0501315	SAMN30443010
4_1_Oct_SF_Bin27	d__Bacteria;p__Proteobacteria;c__Gammaproteobacteria;o__Burkholderiales;f__SG8-39;g__JAABQT01;s__	Proteobacteria; Betaproteobacteria	95.5	2.05	3.443	0.0504126	SAMN30443033
4_1_Oct_SF_Bin8	d__Bacteria;p__Proteobacteria;c__Gammaproteobacteria;o__Burkholderiales;f__SG8-39;g__JAABQT01;s__	Proteobacteria; Betaproteobacteria	62.19	2.95	2.117	0.064345	SAMN30443055
8_1_July_SF_Bin62	d__Bacteria;p__Proteobacteria;c__Gammaproteobacteria;o__Burkholderiales;f__SG8-39;g__JAABQT01;s__	Proteobacteria; Betaproteobacteria	79.9	8.19	2.876	0.0711319	SAMN30443156
4_1_July_SF_Bin28	d__Bacteria;p__Proteobacteria;c__Gammaproteobacteria;o__Burkholderiales;f__SG8-39;g__SG8-39;s__	Proteobacteria; Betaproteobacteria	92.73	6.67	3.934	0.0815351	SAMN30442944
8_1_July_SF_Bin32	d__Bacteria;p__Proteobacteria;c__Gammaproteobacteria;o__Burkholderiales;f__SG8-41;g__;s__	Proteobacteria; Betaproteobacteria	76.58	8.18	3.516	0.0652573	SAMN30443133
4_1_Jan_SF_Bin56	d__Bacteria;p__Proteobacteria;c__Gammaproteobacteria;o__Burkholderiales;f__SG8-41;g__Ga0077527;s__	Proteobacteria; Betaproteobacteria	94.71	2.39	3.133	0.044208	SAMN30442923
4_1_May_SF_Bin11	d__Bacteria;p__Proteobacteria;c__Gammaproteobacteria;o__Burkholderiales;f__SG8-41;g__Ga0077527;s__	Proteobacteria; Betaproteobacteria	62.16	1.18	1.917	0.0357192	SAMN30442978
4_1_Oct_SF_Bin29	d__Bacteria;p__Proteobacteria;c__Gammaproteobacteria;o__Burkholderiales;f__SG8-41;g__Ga0077527;s__	Proteobacteria; Betaproteobacteria	88.16	1.45	2.756	0.0415071	SAMN30443035
13_July_SF_Bin19	d__Bacteria;p__Proteobacteria;c__Gammaproteobacteria;o__Burkholderiales;f__SG8-41;g__SG8-41;s__	Proteobacteria; Betaproteobacteria	93.65	2.86	3.929	0.0362079	SAMN30442643
13_May_SF_Bin60	d__Bacteria;p__Proteobacteria;c__Gammaproteobacteria;o__Burkholderiales;f__SG8-41;g__SG8-41;s__	Proteobacteria; Betaproteobacteria	82.66	2.77	3.553	0.0376681	SAMN30442707
4_1_Oct_SF_Bin40	d__Bacteria;p__Proteobacteria;c__Gammaproteobacteria;o__Burkholderiales;f__Usitatibacteraceae;g__FEB-7;s__	Proteobacteria; Betaproteobacteria	70.79	4.6	2.666	0.115351	SAMN30443043
8_1_Jan_SF_Bin77	d__Bacteria;p__Proteobacteria;c__Gammaproteobacteria;o__Enterobacterales;f__Kangiellaceae;g__;s__	Proteobacteria; Gammaproteobacteria	96.31	4.39	2.864	0.0318251	SAMN30443110
8_1_Oct_SF_Bin101	d__Bacteria;p__Proteobacteria;c__Gammaproteobacteria;o__Enterobacterales;f__Kangiellaceae;g__;s__	Proteobacteria; Gammaproteobacteria	92.94	2.21	2.931	0.02985	SAMN30443180
13_July_SF_Bin35	d__Bacteria;p__Proteobacteria;c__Gammaproteobacteria;o__GCA-001735895;f__GCA-001735895;g__GCA-001735895;s__	Proteobacteria; Gammaproteobacteria	93.1	5.17	4.35	0.0601359	SAMN30442656
13_July_SF_Bin40	d__Bacteria;p__Proteobacteria;c__Gammaproteobacteria;o__GCA-001735895;f__GCA-001735895;g__GCA-001735895;s__	Proteobacteria; Gammaproteobacteria	80.73	5.58	3.687	0.0446131	SAMN30442661
13_May_SF_Bin41	d__Bacteria;p__Proteobacteria;c__Gammaproteobacteria;o__GCA-001735895;f__GCA-001735895;g__GCA-001735895;s__	Proteobacteria; Gammaproteobacteria	97.97	7.03	4.425	0.0609087	SAMN30442692
13_May_SF_Bin92	d__Bacteria;p__Proteobacteria;c__Gammaproteobacteria;o__GCA-001735895;f__GCA-001735895;g__GCA-001735895;s__	Proteobacteria; Gammaproteobacteria	85.63	7.13	4.112	0.0478146	SAMN30442732
21_Jan_SF_Bin30	d__Bacteria;p__Proteobacteria;c__Gammaproteobacteria;o__GCA-001735895;f__GCA-001735895;g__GCA-001735895;s__	Proteobacteria; Gammaproteobacteria	93.02	4.85	3.701	0.0845828	SAMN30442760
21_Jan_SF_Bin37	d__Bacteria;p__Proteobacteria;c__Gammaproteobacteria;o__GCA-001735895;f__GCA-001735895;g__GCA-001735895;s__	Proteobacteria; Gammaproteobacteria	95.29	5.43	3.989	0.0476924	SAMN30442765
21_Jan_SF_Bin69	d__Bacteria;p__Proteobacteria;c__Gammaproteobacteria;o__GCA-001735895;f__GCA-001735895;g__GCA-001735895;s__	Proteobacteria; Gammaproteobacteria	94.83	8.97	5.122	0.114535	SAMN30442791
21_Oct_SF_Bin23	d__Bacteria;p__Proteobacteria;c__Gammaproteobacteria;o__GCA-001735895;f__GCA-001735895;g__GCA-001735895;s__	Proteobacteria; Gammaproteobacteria	81.68	8.1	3.483	0.0424408	SAMN30442835
8_1_Jan_SF_Bin27	d__Bacteria;p__Proteobacteria;c__Gammaproteobacteria;o__GCA-001735895;f__GCA-001735895;g__GCA-001735895;s__	Proteobacteria; Gammaproteobacteria	94.32	6.49	4.151	0.0440413	SAMN30443071
13_May_SF_Bin91	d__Bacteria;p__Proteobacteria;c__Gammaproteobacteria;o__GCA-2729495;f__GCA-2729495;g__;s__	Proteobacteria; Gammaproteobacteria	87.03	7.72	4.357	0.0604881	SAMN30442731
24_Oct_SF_Bin10	d__Bacteria;p__Proteobacteria;c__Gammaproteobacteria;o__GCA-2729495;f__GCA-2729495;g__GCA-002729875;s__	Proteobacteria; Gammaproteobacteria	71.19	4.36	1.958	0.0508628	SAMN30442875
4_1_Jan_SF_Bin11	d__Bacteria;p__Proteobacteria;c__Gammaproteobacteria;o__GCA-2729495;f__GCA-2729495;g__SHZI01;s__	Proteobacteria; Gammaproteobacteria	60.68	3.56	2.165	0.0554152	SAMN30442894
4_1_Oct_SF_Bin38	d__Bacteria;p__Proteobacteria;c__Gammaproteobacteria;o__GCA-2729495;f__GCA-2729495;g__SHZI01;s__	Proteobacteria; Gammaproteobacteria	51.69	5.8	1.925	0.0712644	SAMN30443041
4_1_Oct_SF_Bin4	d__Bacteria;p__Proteobacteria;c__Gammaproteobacteria;o__GCA-2729495;f__GCA-2729495;g__SHZI01;s__	Proteobacteria; Gammaproteobacteria	61.86	7.79	2.525	0.059238	SAMN30443042
13_May_SF_Bin75	d__Bacteria;p__Proteobacteria;c__Gammaproteobacteria;o__Granulosicoccales;f__;g__;s__	Proteobacteria; Gammaproteobacteria	50.74	5.15	2.477	0.0348231	SAMN30442718
21_Jan_SF_Bin59	d__Bacteria;p__Proteobacteria;c__Gammaproteobacteria;o__Granulosicoccales;f__;g__;s__	Proteobacteria; Gammaproteobacteria	89.41	7.22	4.329	0.0357692	SAMN30442786
13_July_SF_Bin55	d__Bacteria;p__Proteobacteria;c__Gammaproteobacteria;o__HK1;f__HK1;g__;s__	Proteobacteria; Gammaproteobacteria	73.98	7.52	3.834	0.0405666	SAMN30442668
13_May_SF_Bin72	d__Bacteria;p__Proteobacteria;c__Gammaproteobacteria;o__HK1;f__HK1;g__;s__	Proteobacteria; Gammaproteobacteria	63.79	6.9	4.191	0.0416538	SAMN30442716
8_1_Jan_SF_Bin17	d__Bacteria;p__Proteobacteria;c__Gammaproteobacteria;o__JABURT01;f__JABURT01;g__JABURT01;s__	Proteobacteria; Gammaproteobacteria	87.61	4.5	3.032	0.0267535	SAMN30443067
8_1_Jan_SF_Bin3_1	d__Bacteria;p__Proteobacteria;c__Gammaproteobacteria;o__JABURT01;f__JABURT01;g__JABURT01;s__	Proteobacteria; Gammaproteobacteria	62.24	6.38	2.645	0.0441503	SAMN30443072
8_1_Jan_SF_Bin31	d__Bacteria;p__Proteobacteria;c__Gammaproteobacteria;o__Nitrosococcales;f__Methylophagaceae;g__GCA-002733105;s__	Proteobacteria; Gammaproteobacteria	81.03	3.45	1.935	0.0233247	SAMN30443073
8_1_Oct_SF_Bin105	d__Bacteria;p__Proteobacteria;c__Gammaproteobacteria;o__Nitrosococcales;f__Methylophagaceae;g__GCA-002733105;s__	Proteobacteria; Gammaproteobacteria	73.37	1.37	1.372	0.017846	SAMN30443184
24_Oct_SF_Bin23	d__Bacteria;p__Proteobacteria;c__Gammaproteobacteria;o__Pseudomonadales;f__Halieaceae;g__Halioglobus;s__	Proteobacteria; Gammaproteobacteria	54.73	7.52	3.788	0.114964	SAMN30442880
4_1_Jan_SF_Bin4	d__Bacteria;p__Proteobacteria;c__Gammaproteobacteria;o__Pseudomonadales;f__Halieaceae;g__Halioglobus;s__	Proteobacteria; Gammaproteobacteria	86.94	5.48	3.772	0.0824602	SAMN30442912
4_1_Oct_SF_Bin34	d__Bacteria;p__Proteobacteria;c__Gammaproteobacteria;o__Pseudomonadales;f__Halieaceae;g__Halioglobus;s__	Proteobacteria; Gammaproteobacteria	73.17	3.34	2.732	0.069757	SAMN30443040
21_Jan_SF_Bin40	d__Bacteria;p__Proteobacteria;c__Gammaproteobacteria;o__Pseudomonadales;f__HTCC2089;g__;s__	Proteobacteria; Gammaproteobacteria	74.11	5.95	4.447	0.0557842	SAMN30442769
8_1_Oct_SF_Bin66	d__Bacteria;p__Proteobacteria;c__Gammaproteobacteria;o__Pseudomonadales;f__HTCC2089;g__;s__	Proteobacteria; Gammaproteobacteria	50.44	5.4	1.875	0.0187833	SAMN30443224
13_Jan_SF_Bin23	d__Bacteria;p__Proteobacteria;c__Gammaproteobacteria;o__S140-43;f__S140-43;g__;s__	Proteobacteria; Gammaproteobacteria	70.69	2.79	2.702	0.0264137	SAMN30442617
4_1_July_SF_Bin9	d__Bacteria;p__Proteobacteria;c__Gammaproteobacteria;o__S140-43;f__S140-43;g__;s__	Proteobacteria; Gammaproteobacteria	78.77	2.82	3.035	0.0219704	SAMN30442975
4_1_May_SF_Bin75	d__Bacteria;p__Proteobacteria;c__Gammaproteobacteria;o__S140-43;f__S140-43;g__;s__	Proteobacteria; Gammaproteobacteria	96.34	1.46	2.895	0.0316658	SAMN30443017
8_1_Jan_SF_Bin1	d__Bacteria;p__Proteobacteria;c__Gammaproteobacteria;o__S140-43;f__S140-43;g__;s__	Proteobacteria; Gammaproteobacteria	59.91	9.32	3.316	0.0353507	SAMN30443057
8_1_Jan_SF_Bin100	d__Bacteria;p__Proteobacteria;c__Gammaproteobacteria;o__S140-43;f__S140-43;g__;s__	Proteobacteria; Gammaproteobacteria	70.15	9.19	3.318	0.0210888	SAMN30443058
8_1_Jan_SF_Bin103	d__Bacteria;p__Proteobacteria;c__Gammaproteobacteria;o__S140-43;f__S140-43;g__;s__	Proteobacteria; Gammaproteobacteria	97.95	4.98	5.272	0.0201266	SAMN30443060
8_1_Jan_SF_Bin33	d__Bacteria;p__Proteobacteria;c__Gammaproteobacteria;o__S140-43;f__S140-43;g__;s__	Proteobacteria; Gammaproteobacteria	63.37	3.14	2.298	0.0168352	SAMN30443075
8_1_July_SF_Bin55	d__Bacteria;p__Proteobacteria;c__Gammaproteobacteria;o__S140-43;f__S140-43;g__;s__	Proteobacteria; Gammaproteobacteria	99.18	3.99	4.967	0.0388673	SAMN30443150
8_1_Oct_SF_Bin3	d__Bacteria;p__Proteobacteria;c__Gammaproteobacteria;o__S140-43;f__S140-43;g__;s__	Proteobacteria; Gammaproteobacteria	93.57	2.33	4.893	0.0186188	SAMN30443201
8_1_Oct_SF_Bin47	d__Bacteria;p__Proteobacteria;c__Gammaproteobacteria;o__S140-43;f__S140-43;g__;s__	Proteobacteria; Gammaproteobacteria	92.88	3.83	3.656	0.0207971	SAMN30443213
4_1_Jan_SF_Bin43	d__Bacteria;p__Proteobacteria;c__Gammaproteobacteria;o__Steroidobacterales;f__Steroidobacteraceae;g__RPQJ01;s__	Proteobacteria; Gammaproteobacteria	58.77	2.18	2.102	0.0664206	SAMN30442916
4_1_Jan_SF_Bin60	d__Bacteria;p__Proteobacteria;c__Gammaproteobacteria;o__Steroidobacterales;f__Steroidobacteraceae;g__RPQJ01;s__	Proteobacteria; Gammaproteobacteria	91.44	6.41	3.372	0.0657276	SAMN30442927
4_1_May_SF_Bin43	d__Bacteria;p__Proteobacteria;c__Gammaproteobacteria;o__Steroidobacterales;f__Steroidobacteraceae;g__RPQJ01;s__	Proteobacteria; Gammaproteobacteria	92.03	3.43	3.359	0.0625225	SAMN30442992
4_1_May_SF_Bin67	d__Bacteria;p__Proteobacteria;c__Gammaproteobacteria;o__Steroidobacterales;f__Steroidobacteraceae;g__RPQJ01;s__	Proteobacteria; Gammaproteobacteria	70.31	2.61	2.578	0.0721722	SAMN30443012
4_1_Oct_SF_Bin42	d__Bacteria;p__Proteobacteria;c__Gammaproteobacteria;o__Steroidobacterales;f__Steroidobacteraceae;g__RPQJ01;s__	Proteobacteria; Gammaproteobacteria	91.29	7.49	3.536	0.0622153	SAMN30443045
4_1_Oct_SF_Bin43	d__Bacteria;p__Proteobacteria;c__Gammaproteobacteria;o__Steroidobacterales;f__Steroidobacteraceae;g__RPQJ01;s__	Proteobacteria; Gammaproteobacteria	75.31	6.35	2.97	0.0782121	SAMN30443046
4_1_May_SF_Bin34	d__Bacteria;p__Proteobacteria;c__Gammaproteobacteria;o__Steroidobacterales;f__Steroidobacteraceae;g__SCUD01;s__	Proteobacteria; Gammaproteobacteria	82.63	3.9	2.563	0.0818408	SAMN30442987
21_Jan_SF_Bin15	d__Bacteria;p__Proteobacteria;c__Gammaproteobacteria;o__SZUA-146;f__SZUA-146;g__JABDJB01;s__	Proteobacteria; Gammaproteobacteria	59.58	1.42	2.497	0.0243316	SAMN30442753
21_Jan_SF_Bin23	d__Bacteria;p__Proteobacteria;c__Gammaproteobacteria;o__SZUA-146;f__SZUA-146;g__JABDJB01;s__	Proteobacteria; Gammaproteobacteria	87.65	3.32	3.345	0.0405662	SAMN30442756
21_July_SF_Bin19	d__Bacteria;p__Proteobacteria;c__Gammaproteobacteria;o__SZUA-146;f__SZUA-146;g__JABDJB01;s__	Proteobacteria; Gammaproteobacteria	69.74	2.53	2.494	0.0304254	SAMN30442804
8_1_Jan_SF_Bin23	d__Bacteria;p__Proteobacteria;c__Gammaproteobacteria;o__SZUA-152;f__SZUA-152;g__;s__	Proteobacteria; Gammaproteobacteria	99.3	3.02	5.184	0.022749	SAMN30443070
8_1_Oct_SF_Bin98	d__Bacteria;p__Proteobacteria;c__Gammaproteobacteria;o__SZUA-152;f__SZUA-152;g__;s__	Proteobacteria; Gammaproteobacteria	99.24	3.54	5.054	0.0203331	SAMN30443248
8_1_Jan_SF_Bin54	d__Bacteria;p__Proteobacteria;c__Gammaproteobacteria;o__SZUA-229;f__SZUA-229;g__;s__	Proteobacteria; Gammaproteobacteria	95.42	5.52	3.286	0.0517523	SAMN30443093
8_1_Jan_SF_Bin65	d__Bacteria;p__Proteobacteria;c__Gammaproteobacteria;o__SZUA-229;f__SZUA-229;g__;s__	Proteobacteria; Gammaproteobacteria	97.59	3.85	3.426	0.0275624	SAMN30443102
8_1_Jan_SF_Bin98	d__Bacteria;p__Proteobacteria;c__Gammaproteobacteria;o__SZUA-229;f__SZUA-229;g__;s__	Proteobacteria; Gammaproteobacteria	94.95	1.23	2.928	0.0644921	SAMN30443123
8_1_July_SF_Bin40	d__Bacteria;p__Proteobacteria;c__Gammaproteobacteria;o__SZUA-229;f__SZUA-229;g__;s__	Proteobacteria; Gammaproteobacteria	84.63	4.81	2.269	0.0331239	SAMN30443140
8_1_July_SF_Bin54	d__Bacteria;p__Proteobacteria;c__Gammaproteobacteria;o__SZUA-229;f__SZUA-229;g__;s__	Proteobacteria; Gammaproteobacteria	94.67	4.6	2.845	0.0451465	SAMN30443149
8_1_Oct_SF_Bin28	d__Bacteria;p__Proteobacteria;c__Gammaproteobacteria;o__SZUA-229;f__SZUA-229;g__;s__	Proteobacteria; Gammaproteobacteria	67.89	2.4	1.937	0.0324876	SAMN30443199
8_1_Oct_SF_Bin73	d__Bacteria;p__Proteobacteria;c__Gammaproteobacteria;o__SZUA-229;f__SZUA-229;g__;s__	Proteobacteria; Gammaproteobacteria	77.27	5.09	2.707	0.0291016	SAMN30443230
13_Jan_SF_Bin13	d__Bacteria;p__Proteobacteria;c__Gammaproteobacteria;o__SZUA-229;f__SZUA-229;g__SZUA-116;s__	Proteobacteria; Gammaproteobacteria	57.37	6.4	1.367	0.0367007	SAMN30442613
8_1_Jan_SF_Bin56	d__Bacteria;p__Proteobacteria;c__Gammaproteobacteria;o__SZUA-229;f__SZUA-229;g__SZUA-116;s__	Proteobacteria; Gammaproteobacteria	96.77	2.44	2.883	0.0550152	SAMN30443095
8_1_July_SF_Bin66	d__Bacteria;p__Proteobacteria;c__Gammaproteobacteria;o__SZUA-229;f__SZUA-229;g__SZUA-116;s__	Proteobacteria; Gammaproteobacteria	91.78	2.67	2.692	0.0683836	SAMN30443160
8_1_Oct_SF_Bin34	d__Bacteria;p__Proteobacteria;c__Gammaproteobacteria;o__SZUA-229;f__SZUA-229;g__SZUA-116;s__	Proteobacteria; Gammaproteobacteria	87.06	6.58	2.208	0.0307576	SAMN30443204
13_Jan_SF_Bin42	d__Bacteria;p__Proteobacteria;c__Gammaproteobacteria;o__Thiohalomonadales;f__Thiohalomonadaceae;g__;s__	Proteobacteria; Gammaproteobacteria	77.32	3.06	2.044	0.0244094	SAMN30442625
8_1_Oct_SF_Bin95	d__Bacteria;p__Proteobacteria;c__Gammaproteobacteria;o__Thiohalomonadales;f__Thiohalomonadaceae;g__;s__	Proteobacteria; Gammaproteobacteria	96.6	2.37	2.696	0.0444685	SAMN30443246
21_Jan_SF_Bin34	d__Bacteria;p__Proteobacteria;c__Gammaproteobacteria;o__UBA4575;f__UBA4575;g__JABDMD01;s__JABDMD01 sp013001685	Proteobacteria; Gammaproteobacteria	86.17	6.55	2.231	0.0421839	SAMN30442762
24_May_SF_Bin29	d__Bacteria;p__Proteobacteria;c__Gammaproteobacteria;o__UBA6429;f__UBA6429;g__;s__	Proteobacteria; Gammaproteobacteria	75.37	5.72	1.881	0.0741507	SAMN30442869
8_1_Jan_SF_Bin105	d__Bacteria;p__Proteobacteria;c__Gammaproteobacteria;o__UBA6429;f__UBA6429;g__;s__	Proteobacteria; Gammaproteobacteria	97.69	3.21	4.136	0.0387799	SAMN30443061
8_1_Jan_SF_Bin39	d__Bacteria;p__Proteobacteria;c__Gammaproteobacteria;o__UBA6429;f__UBA6429;g__;s__	Proteobacteria; Gammaproteobacteria	82.46	7.53	2.623	0.0997187	SAMN30443079
8_1_Jan_SF_Bin44	d__Bacteria;p__Proteobacteria;c__Gammaproteobacteria;o__UBA6429;f__UBA6429;g__;s__	Proteobacteria; Gammaproteobacteria	50.95	3.21	1.556	0.0377913	SAMN30443084
8_1_Jan_SF_Bin63	d__Bacteria;p__Proteobacteria;c__Gammaproteobacteria;o__UBA6429;f__UBA6429;g__;s__	Proteobacteria; Gammaproteobacteria	80.5	2.8	2.506	0.0281641	SAMN30443101
8_1_Jan_SF_Bin82	d__Bacteria;p__Proteobacteria;c__Gammaproteobacteria;o__UBA6429;f__UBA6429;g__;s__	Proteobacteria; Gammaproteobacteria	95.36	5.02	3.528	0.038865	SAMN30443114
8_1_July_SF_Bin57	d__Bacteria;p__Proteobacteria;c__Gammaproteobacteria;o__UBA6429;f__UBA6429;g__;s__	Proteobacteria; Gammaproteobacteria	71.62	8.98	3.597	0.0266013	SAMN30443151
8_1_May_SF_Bin12	d__Bacteria;p__Proteobacteria;c__Gammaproteobacteria;o__UBA6429;f__UBA6429;g__;s__	Proteobacteria; Gammaproteobacteria	96.36	1.58	4.299	0.0966002	SAMN30443170
8_1_Oct_SF_Bin111	d__Bacteria;p__Proteobacteria;c__Gammaproteobacteria;o__UBA6429;f__UBA6429;g__;s__	Proteobacteria; Gammaproteobacteria	82.2	5.61	2.393	0.0516877	SAMN30443188
8_1_Oct_SF_Bin18	d__Bacteria;p__Proteobacteria;c__Gammaproteobacteria;o__UBA6429;f__UBA6429;g__;s__	Proteobacteria; Gammaproteobacteria	69.43	2.32	1.761	0.0891511	SAMN30443192
8_1_Oct_SF_Bin77	d__Bacteria;p__Proteobacteria;c__Gammaproteobacteria;o__UBA6429;f__UBA6429;g__;s__	Proteobacteria; Gammaproteobacteria	75.47	2.62	2.148	0.0226133	SAMN30443232
13_July_SF_Bin11	d__Bacteria;p__Proteobacteria;c__Gammaproteobacteria;o__UBA6522;f__UBA6522;g__;s__	Proteobacteria; Gammaproteobacteria	81.15	2.41	3.523	0.0535926	SAMN30442641
13_May_SF_Bin84	d__Bacteria;p__Proteobacteria;c__Gammaproteobacteria;o__UBA6522;f__UBA6522;g__;s__	Proteobacteria; Gammaproteobacteria	87.85	4.17	3.779	0.0577608	SAMN30442724
13_July_SF_Bin31	d__Bacteria;p__Proteobacteria;c__Gammaproteobacteria;o__UBA9214;f__UBA9214;g__SZUA-186;s__	Proteobacteria; Gammaproteobacteria	58.93	1.28	2.077	0.0983964	SAMN30442652
13_Oct_SF_Bin20	d__Bacteria;p__Proteobacteria;c__Gammaproteobacteria;o__UBA9214;f__UBA9214;g__SZUA-186;s__	Proteobacteria; Gammaproteobacteria	70.13	8.39	2.295	0.102655	SAMN30442739
21_Oct_SF_Bin2	d__Bacteria;p__Proteobacteria;c__Gammaproteobacteria;o__UBA9214;f__UBA9214;g__SZUA-186;s__	Proteobacteria; Gammaproteobacteria	63.91	5.77	1.709	0.131217	SAMN30442834
24_Jan_SF_Bin14	d__Bacteria;p__Proteobacteria;c__Gammaproteobacteria;o__UBA9214;f__UBA9214;g__SZUA-186;s__	Proteobacteria; Gammaproteobacteria	57.62	9.93	1.95	0.0845068	SAMN30442844
21_May_SF_Bin27	d__Bacteria;p__Proteobacteria;c__Gammaproteobacteria;o__UBA9214;f__UBA9214;g__UBA9214;s__	Proteobacteria; Gammaproteobacteria	66.25	8.87	2.285	0.068057	SAMN30442817
24_Jan_SF_Bin6	d__Bacteria;p__Proteobacteria;c__Gammaproteobacteria;o__UBA9214;f__UBA9214;g__UBA9214;s__	Proteobacteria; Gammaproteobacteria	77.46	3.4	2.431	0.0586312	SAMN30442850
24_July_SF_Bin20	d__Bacteria;p__Proteobacteria;c__Gammaproteobacteria;o__UBA9214;f__UBA9214;g__UBA9214;s__	Proteobacteria; Gammaproteobacteria	64.25	3.11	1.96	0.0534804	SAMN30442860
24_May_SF_Bin18	d__Bacteria;p__Proteobacteria;c__Gammaproteobacteria;o__UBA9214;f__UBA9214;g__UBA9214;s__	Proteobacteria; Gammaproteobacteria	94	2.41	2.401	0.0933862	SAMN30442864
24_May_SF_Bin19	d__Bacteria;p__Proteobacteria;c__Gammaproteobacteria;o__UBA9214;f__UBA9214;g__UBA9214;s__	Proteobacteria; Gammaproteobacteria	67.15	5.51	1.895	0.0519893	SAMN30442865
24_Oct_SF_Bin33	d__Bacteria;p__Proteobacteria;c__Gammaproteobacteria;o__UBA9214;f__UBA9214;g__UBA9214;s__	Proteobacteria; Gammaproteobacteria	87.75	5.7	2.61	0.0593227	SAMN30442887
8_1_Jan_SF_Bin53	d__Bacteria;p__Proteobacteria;c__Gammaproteobacteria;o__UBA9214;f__UBA9214;g__UBA9214;s__	Proteobacteria; Gammaproteobacteria	70.38	3.98	1.982	0.0783417	SAMN30443092
8_1_July_SF_Bin11	d__Bacteria;p__Proteobacteria;c__Gammaproteobacteria;o__UBA9214;f__UBA9214;g__UBA9214;s__	Proteobacteria; Gammaproteobacteria	81.71	3	2.626	0.0936811	SAMN30443124
4_1_Jan_SF_Bin26	d__Bacteria;p__Proteobacteria;c__Gammaproteobacteria;o__Woeseiales;f__Woeseiaceae;g__;s__	Proteobacteria; Gammaproteobacteria	88.56	5.54	4.849	0.0512685	SAMN30442902
4_1_May_SF_Bin35	d__Bacteria;p__Proteobacteria;c__Gammaproteobacteria;o__Woeseiales;f__Woeseiaceae;g__;s__	Proteobacteria; Gammaproteobacteria	87.87	6.99	4.652	0.0492126	SAMN30442988
4_1_Oct_SF_Bin22	d__Bacteria;p__Proteobacteria;c__Gammaproteobacteria;o__Woeseiales;f__Woeseiaceae;g__;s__	Proteobacteria; Gammaproteobacteria	86.9	3.04	4.284	0.0468109	SAMN30443029
4_1_Jan_SF_Bin32	d__Bacteria;p__Proteobacteria;c__Gammaproteobacteria;o__Woeseiales;f__Woeseiaceae;g__IDS-8;s__	Proteobacteria; Gammaproteobacteria	86.75	5.55	3.74	0.0570159	SAMN30442906
4_1_May_SF_Bin44	d__Bacteria;p__Proteobacteria;c__Gammaproteobacteria;o__Woeseiales;f__Woeseiaceae;g__IDS-8;s__	Proteobacteria; Gammaproteobacteria	89.69	3.85	3.92	0.0619812	SAMN30442993
4_1_Oct_SF_Bin50	d__Bacteria;p__Proteobacteria;c__Gammaproteobacteria;o__Woeseiales;f__Woeseiaceae;g__IDS-8;s__	Proteobacteria; Gammaproteobacteria	86.99	3.84	3.805	0.057227	SAMN30443050
8_1_July_SF_Bin46	d__Bacteria;p__Proteobacteria;c__Gammaproteobacteria;o__Woeseiales;f__Woeseiaceae;g__IDS-8;s__	Proteobacteria; Gammaproteobacteria	59.99	7.58	2.845	0.0481995	SAMN30443144
13_Jan_SF_Bin29	d__Bacteria;p__Proteobacteria;c__Gammaproteobacteria;o__Woeseiales;f__Woeseiaceae;g__JAACFB01;s__	Proteobacteria; Gammaproteobacteria	84.8	5.76	3.531	0.0613828	SAMN30442618
13_Jan_SF_Bin44	d__Bacteria;p__Proteobacteria;c__Gammaproteobacteria;o__Woeseiales;f__Woeseiaceae;g__JAACFB01;s__	Proteobacteria; Gammaproteobacteria	64.96	4.3	2.789	0.0390388	SAMN30442627
13_July_SF_Bin18	d__Bacteria;p__Proteobacteria;c__Gammaproteobacteria;o__Woeseiales;f__Woeseiaceae;g__JAACFB01;s__	Proteobacteria; Gammaproteobacteria	64.2	6	2.972	0.0415622	SAMN30442642
13_July_SF_Bin38	d__Bacteria;p__Proteobacteria;c__Gammaproteobacteria;o__Woeseiales;f__Woeseiaceae;g__JAACFB01;s__	Proteobacteria; Gammaproteobacteria	90.17	4.48	3.834	0.0641811	SAMN30442659
13_July_SF_Bin49	d__Bacteria;p__Proteobacteria;c__Gammaproteobacteria;o__Woeseiales;f__Woeseiaceae;g__JAACFB01;s__	Proteobacteria; Gammaproteobacteria	84.69	8.86	3.2	0.0694351	SAMN30442664
13_May_SF_Bin22	d__Bacteria;p__Proteobacteria;c__Gammaproteobacteria;o__Woeseiales;f__Woeseiaceae;g__JAACFB01;s__	Proteobacteria; Gammaproteobacteria	93.97	7.68	3.678	0.0711828	SAMN30442678
13_May_SF_Bin44	d__Bacteria;p__Proteobacteria;c__Gammaproteobacteria;o__Woeseiales;f__Woeseiaceae;g__JAACFB01;s__	Proteobacteria; Gammaproteobacteria	50.31	2.61	1.652	0.0525314	SAMN30442694
13_May_SF_Bin52	d__Bacteria;p__Proteobacteria;c__Gammaproteobacteria;o__Woeseiales;f__Woeseiaceae;g__JAACFB01;s__	Proteobacteria; Gammaproteobacteria	83.69	4.23	3.186	0.0596223	SAMN30442700
13_May_SF_Bin53	d__Bacteria;p__Proteobacteria;c__Gammaproteobacteria;o__Woeseiales;f__Woeseiaceae;g__JAACFB01;s__	Proteobacteria; Gammaproteobacteria	88.66	4.91	4.248	0.0515655	SAMN30442701
13_May_SF_Bin93	d__Bacteria;p__Proteobacteria;c__Gammaproteobacteria;o__Woeseiales;f__Woeseiaceae;g__JAACFB01;s__	Proteobacteria; Gammaproteobacteria	63.35	8.49	2.869	0.0696308	SAMN30442733
13_Oct_SF_Bin18	d__Bacteria;p__Proteobacteria;c__Gammaproteobacteria;o__Woeseiales;f__Woeseiaceae;g__JAACFB01;s__	Proteobacteria; Gammaproteobacteria	51.56	9.71	2.087	0.109506	SAMN30442738
13_Oct_SF_Bin22	d__Bacteria;p__Proteobacteria;c__Gammaproteobacteria;o__Woeseiales;f__Woeseiaceae;g__JAACFB01;s__	Proteobacteria; Gammaproteobacteria	76.7	5.81	3.157	0.0592369	SAMN30442740
21_Jan_SF_Bin38	d__Bacteria;p__Proteobacteria;c__Gammaproteobacteria;o__Woeseiales;f__Woeseiaceae;g__JAACFB01;s__	Proteobacteria; Gammaproteobacteria	88.72	2.67	3.533	0.0437121	SAMN30442766
21_July_SF_Bin13	d__Bacteria;p__Proteobacteria;c__Gammaproteobacteria;o__Woeseiales;f__Woeseiaceae;g__JAACFB01;s__	Proteobacteria; Gammaproteobacteria	70.85	0	3.197	0.0432129	SAMN30442801
21_May_SF_Bin21	d__Bacteria;p__Proteobacteria;c__Gammaproteobacteria;o__Woeseiales;f__Woeseiaceae;g__JAACFB01;s__	Proteobacteria; Gammaproteobacteria	73.28	0	3.095	0.0384254	SAMN30442812
4_1_Jan_SF_Bin67	d__Bacteria;p__Proteobacteria;c__Gammaproteobacteria;o__Woeseiales;f__Woeseiaceae;g__JAACFB01;s__	Proteobacteria; Gammaproteobacteria	85.97	2.83	3.288	0.0413582	SAMN30442932
4_1_May_SF_Bin74	d__Bacteria;p__Proteobacteria;c__Gammaproteobacteria;o__Woeseiales;f__Woeseiaceae;g__JAACFB01;s__	Proteobacteria; Gammaproteobacteria	87.12	2.44	3.335	0.0422971	SAMN30443016
4_1_Oct_SF_Bin24	d__Bacteria;p__Proteobacteria;c__Gammaproteobacteria;o__Woeseiales;f__Woeseiaceae;g__JAACFB01;s__	Proteobacteria; Gammaproteobacteria	86.4	1.97	3.212	0.0413955	SAMN30443031
21_Jan_SF_Bin14	d__Bacteria;p__Proteobacteria;c__Gammaproteobacteria;o__Woeseiales;f__Woeseiaceae;g__JAACFE01;s__JAACFE01 sp009937505	Proteobacteria; Gammaproteobacteria	57.91	2.48	2.084	0.0604955	SAMN30442752
21_July_SF_Bin10	d__Bacteria;p__Proteobacteria;c__Gammaproteobacteria;o__Woeseiales;f__Woeseiaceae;g__JAACFE01;s__JAACFE01 sp009937505	Proteobacteria; Gammaproteobacteria	79.74	9.01	2.938	0.0627898	SAMN30442799
21_May_SF_Bin39	d__Bacteria;p__Proteobacteria;c__Gammaproteobacteria;o__Woeseiales;f__Woeseiaceae;g__JAACFE01;s__JAACFE01 sp009937505	Proteobacteria; Gammaproteobacteria	88.08	3.74	3.254	0.0596741	SAMN30442823
21_Oct_SF_Bin29	d__Bacteria;p__Proteobacteria;c__Gammaproteobacteria;o__Woeseiales;f__Woeseiaceae;g__JAACFE01;s__JAACFE01 sp009937505	Proteobacteria; Gammaproteobacteria	86	4.3	3.153	0.0587163	SAMN30442840
24_Jan_SF_Bin7	d__Bacteria;p__Proteobacteria;c__Gammaproteobacteria;o__Woeseiales;f__Woeseiaceae;g__JAACFE01;s__JAACFE01 sp009937505	Proteobacteria; Gammaproteobacteria	89.83	9.25	3.444	0.0638138	SAMN30442851
24_July_SF_Bin19	d__Bacteria;p__Proteobacteria;c__Gammaproteobacteria;o__Woeseiales;f__Woeseiaceae;g__JAACFE01;s__JAACFE01 sp009937505	Proteobacteria; Gammaproteobacteria	52.75	9.74	2.021	0.0643058	SAMN30442858
24_May_SF_Bin26	d__Bacteria;p__Proteobacteria;c__Gammaproteobacteria;o__Woeseiales;f__Woeseiaceae;g__JAACFE01;s__JAACFE01 sp009937505	Proteobacteria; Gammaproteobacteria	61.08	7.33	2.32	0.0587064	SAMN30442866
24_Oct_SF_Bin22	d__Bacteria;p__Proteobacteria;c__Gammaproteobacteria;o__Woeseiales;f__Woeseiaceae;g__JAACFE01;s__JAACFE01 sp009937505	Proteobacteria; Gammaproteobacteria	88.74	8.85	3.234	0.0617573	SAMN30442879
13_July_SF_Bin51	d__Bacteria;p__Proteobacteria;c__Gammaproteobacteria;o__Woeseiales;f__Woeseiaceae;g__SZUA-117;s__	Proteobacteria; Gammaproteobacteria	55.85	5.04	2.96	0.0507092	SAMN30442666
24_Oct_SF_Bin26	d__Bacteria;p__Proteobacteria;c__Gammaproteobacteria;o__Woeseiales;f__Woeseiaceae;g__SZUA-117;s__	Proteobacteria; Gammaproteobacteria	67.15	5.91	3.587	0.101582	SAMN30442882
4_1_Jan_SF_Bin31	d__Bacteria;p__Proteobacteria;c__Gammaproteobacteria;o__Woeseiales;f__Woeseiaceae;g__SZUA-117;s__	Proteobacteria; Gammaproteobacteria	58.94	2.77	2.674	0.0642181	SAMN30442905
4_1_Oct_SF_Bin33	d__Bacteria;p__Proteobacteria;c__Gammaproteobacteria;o__Woeseiales;f__Woeseiaceae;g__SZUA-117;s__	Proteobacteria; Gammaproteobacteria	50.56	0.86	2.027	0.0564143	SAMN30443039
21_Jan_SF_Bin68	d__Bacteria;p__Proteobacteria;c__Gammaproteobacteria;o__Woeseiales;f__Woeseiaceae;g__UBA1844;s__	Proteobacteria; Gammaproteobacteria	79.37	0.88	2.568	0.0370192	SAMN30442790
13_Jan_SF_Bin32	d__Bacteria;p__Proteobacteria;c__Gammaproteobacteria;o__Woeseiales;f__Woeseiaceae;g__UBA1847;s__	Proteobacteria; Gammaproteobacteria	64.28	3.53	2.091	0.1145	SAMN30442621
13_Jan_SF_Bin58	d__Bacteria;p__Proteobacteria;c__Gammaproteobacteria;o__Woeseiales;f__Woeseiaceae;g__UBA1847;s__	Proteobacteria; Gammaproteobacteria	67.87	3.86	2.409	0.0454942	SAMN30442634
13_July_SF_Bin23_1	d__Bacteria;p__Proteobacteria;c__Gammaproteobacteria;o__Woeseiales;f__Woeseiaceae;g__UBA1847;s__	Proteobacteria; Gammaproteobacteria	71.93	4.77	2.685	0.0453253	SAMN30442645
13_July_SF_Bin23_2	d__Bacteria;p__Proteobacteria;c__Gammaproteobacteria;o__Woeseiales;f__Woeseiaceae;g__UBA1847;s__	Proteobacteria; Gammaproteobacteria	52.73	2.41	1.594	0.0802134	SAMN30442646
13_May_SF_Bin65	d__Bacteria;p__Proteobacteria;c__Gammaproteobacteria;o__Woeseiales;f__Woeseiaceae;g__UBA1847;s__	Proteobacteria; Gammaproteobacteria	74.12	2.1	2.487	0.0452349	SAMN30442711
13_May_SF_Bin98	d__Bacteria;p__Proteobacteria;c__Gammaproteobacteria;o__Woeseiales;f__Woeseiaceae;g__UBA1847;s__	Proteobacteria; Gammaproteobacteria	73.44	8.19	3.013	0.100141	SAMN30442735
13_Oct_SF_Bin17	d__Bacteria;p__Proteobacteria;c__Gammaproteobacteria;o__Woeseiales;f__Woeseiaceae;g__UBA1847;s__	Proteobacteria; Gammaproteobacteria	74.51	7.28	3.181	0.149483	SAMN30442737
21_Jan_SF_Bin41	d__Bacteria;p__Proteobacteria;c__Gammaproteobacteria;o__Woeseiales;f__Woeseiaceae;g__UBA1847;s__	Proteobacteria; Gammaproteobacteria	73.42	8.15	3.081	0.0989569	SAMN30442770
21_Jan_SF_Bin42	d__Bacteria;p__Proteobacteria;c__Gammaproteobacteria;o__Woeseiales;f__Woeseiaceae;g__UBA1847;s__	Proteobacteria; Gammaproteobacteria	59.12	2.46	2.323	0.100323	SAMN30442771
21_July_SF_Bin22	d__Bacteria;p__Proteobacteria;c__Gammaproteobacteria;o__Woeseiales;f__Woeseiaceae;g__UBA1847;s__	Proteobacteria; Gammaproteobacteria	54.88	2.9	1.886	0.106488	SAMN30442806
21_May_SF_Bin26	d__Bacteria;p__Proteobacteria;c__Gammaproteobacteria;o__Woeseiales;f__Woeseiaceae;g__UBA1847;s__	Proteobacteria; Gammaproteobacteria	82.23	8.07	2.746	0.135005	SAMN30442816
21_Oct_SF_Bin13	d__Bacteria;p__Proteobacteria;c__Gammaproteobacteria;o__Woeseiales;f__Woeseiaceae;g__UBA1847;s__	Proteobacteria; Gammaproteobacteria	58.9	4.19	2.442	0.132036	SAMN30442829
21_Oct_SF_Bin28	d__Bacteria;p__Proteobacteria;c__Gammaproteobacteria;o__Woeseiales;f__Woeseiaceae;g__UBA1847;s__	Proteobacteria; Gammaproteobacteria	52.39	9.61	2.049	0.17338	SAMN30442839
24_Oct_SF_Bin30	d__Bacteria;p__Proteobacteria;c__Gammaproteobacteria;o__Woeseiales;f__Woeseiaceae;g__UBA1847;s__	Proteobacteria; Gammaproteobacteria	55.39	4.36	2.123	0.126448	SAMN30442885
4_1_Jan_SF_Bin34	d__Bacteria;p__Proteobacteria;c__Gammaproteobacteria;o__Woeseiales;f__Woeseiaceae;g__UBA1847;s__	Proteobacteria; Gammaproteobacteria	89.41	3.66	3.546	0.0427199	SAMN30442908
4_1_May_SF_Bin72	d__Bacteria;p__Proteobacteria;c__Gammaproteobacteria;o__Woeseiales;f__Woeseiaceae;g__UBA1847;s__	Proteobacteria; Gammaproteobacteria	86.94	3.36	3.254	0.0409626	SAMN30443015
4_1_Oct_SF_Bin55	d__Bacteria;p__Proteobacteria;c__Gammaproteobacteria;o__Woeseiales;f__Woeseiaceae;g__UBA1847;s__	Proteobacteria; Gammaproteobacteria	88.81	3.5	3.459	0.0432974	SAMN30443054
8_1_Jan_SF_Bin85	d__Bacteria;p__Proteobacteria;c__Gammaproteobacteria;o__Woeseiales;f__Woeseiaceae;g__UBA1847;s__	Proteobacteria; Gammaproteobacteria	76.17	6.53	2.565	0.0455962	SAMN30443115
8_1_July_SF_Bin65	d__Bacteria;p__Proteobacteria;c__Gammaproteobacteria;o__Woeseiales;f__Woeseiaceae;g__UBA1847;s__	Proteobacteria; Gammaproteobacteria	89.34	3.76	2.811	0.0420239	SAMN30443159
8_1_July_SF_Bin68	d__Bacteria;p__Proteobacteria;c__Gammaproteobacteria;o__Woeseiales;f__Woeseiaceae;g__UBA1847;s__	Proteobacteria; Gammaproteobacteria	59.56	4.77	2.381	0.0534222	SAMN30443161
8_1_July_SF_Bin69	d__Bacteria;p__Proteobacteria;c__Gammaproteobacteria;o__Woeseiales;f__Woeseiaceae;g__UBA1847;s__	Proteobacteria; Gammaproteobacteria	87.73	4.56	3.451	0.053431	SAMN30443162
21_May_SF_Bin5	d__Bacteria;p__Proteobacteria;c__Gammaproteobacteria;o__Xanthomonadales;f__SZUA-36;g__JABDPF01;s__	Proteobacteria; Gammaproteobacteria	85.6	5.46	3.156	0.0375189	SAMN30442826
24_July_SF_Bin2	d__Bacteria;p__Proteobacteria;c__Gammaproteobacteria;o__Xanthomonadales;f__SZUA-36;g__JABDPF01;s__	Proteobacteria; Gammaproteobacteria	84.3	5.72	3.343	0.0427017	SAMN30442859
24_May_SF_Bin1	d__Bacteria;p__Proteobacteria;c__Gammaproteobacteria;o__Xanthomonadales;f__SZUA-36;g__JABDPF01;s__	Proteobacteria; Gammaproteobacteria	80.33	5.62	3.064	0.0362989	SAMN30442862
24_Oct_SF_Bin28	d__Bacteria;p__Proteobacteria;c__Gammaproteobacteria;o__Xanthomonadales;f__SZUA-36;g__JABDPF01;s__	Proteobacteria; Gammaproteobacteria	96.01	7.88	3.844	0.046886	SAMN30442884
24_July_SF_Bin11	d__Bacteria;p__Proteobacteria;c__Gammaproteobacteria;o__Xanthomonadales;f__SZUA-36;g__SZUA-36;s__	Proteobacteria; Gammaproteobacteria	57.11	3.85	2.304	0.0538355	SAMN30442854
24_Oct_SF_Bin7	d__Bacteria;p__Proteobacteria;c__Gammaproteobacteria;o__Xanthomonadales;f__SZUA-36;g__SZUA-36;s__	Proteobacteria; Gammaproteobacteria	88.21	7.64	3.889	0.0720717	SAMN30442891
24_Jan_SF_Bin3	d__Bacteria;p__Proteobacteria;c__Gammaproteobacteria;o__XN24;f__XN24;g__;s__	Proteobacteria; Gammaproteobacteria	52.18	2.43	1.862	0.053969	SAMN30442848
24_Oct_SF_Bin43	d__Bacteria;p__Proteobacteria;c__Gammaproteobacteria;o__XN24;f__XN24;g__;s__	Proteobacteria; Gammaproteobacteria	75.8	3.05	2.852	0.0665002	SAMN30442890
4_1_July_SF_Bin22	d__Bacteria;p__SAR324;c__SAR324;o__SAR324;f__;g__;s__	Proteobacteria; Deltaproteobacteria	94.54	5.04	2.789	0.217009	SAMN30442940
4_1_July_SF_Bin46	d__Bacteria;p__SAR324;c__SAR324;o__SAR324;f__;g__;s__	Proteobacteria; Deltaproteobacteria	84.77	1.12	2.274	0.029868	SAMN30442958
4_1_July_SF_Bin48	d__Bacteria;p__SAR324;c__SAR324;o__SAR324;f__;g__;s__	Proteobacteria; Deltaproteobacteria	84.48	8.67	3.596	0.0698186	SAMN30442960
8_1_Oct_SF_Bin72	d__Bacteria;p__SAR324;c__SAR324;o__SAR324;f__;g__;s__	Proteobacteria; Deltaproteobacteria	82.92	2.81	3.167	0.0315382	SAMN30443229
8_1_July_SF_Bin26	d__Bacteria;p__SAR324;c__SAR324;o__XYD2-FULL-50-16;f__XYD2-FULL-50-16;g__;s__	Proteobacteria; Deltaproteobacteria	87.27	1.19	3.035	0.0233667	SAMN30443130
8_1_Oct_SF_Bin1	d__Bacteria;p__Spirochaetota;c__Leptospirae;o__Leptospirales;f__Leptonemataceae;g__;s__	Spirochaetes	86.06	0	3.484	0.0217647	SAMN30443178
4_1_July_SF_Bin31	d__Bacteria;p__Spirochaetota;c__Leptospirae;o__Turneriellales;f__;g__;s__	Spirochaetes	93.75	3.47	2.646	0.0272476	SAMN30442948
4_1_July_SF_Bin56	d__Bacteria;p__Spirochaetota;c__Leptospirae;o__Turneriellales;f__;g__;s__	Spirochaetes	90.95	3.7	2.857	0.0409878	SAMN30442968
8_1_Oct_SF_Bin24	d__Bacteria;p__Spirochaetota;c__Leptospirae;o__Turneriellales;f__J094;g__;s__	Spirochaetes	93.75	2.25	3.316	0.0439764	SAMN30443196
8_1_Oct_SF_Bin25	d__Bacteria;p__Spirochaetota;c__Leptospirae;o__Turneriellales;f__J094;g__;s__	Spirochaetes	93.19	1.12	3.042	0.0348765	SAMN30443197
4_1_July_SF_Bin25	d__Bacteria;p__Spirochaetota;c__UBA6919;o__UBA6919;f__UBA6919;g__;s__	Spirochaetes	80.29	8.8	2.997	0.0318394	SAMN30442942
8_1_Oct_SF_Bin4	d__Bacteria;p__Spirochaetota;c__UBA6919;o__UBA6919;f__UBA6919;g__;s__	Spirochaetes	62.46	6.81	2.864	0.016677	SAMN30443209
21_Jan_SF_Bin1	d__Bacteria;p__Tectomicrobia;c__Entotheonellia;o__Entotheonellales;f__Entotheonellaceae;g__;s__	Nitrospinae	69.93	3.04	7.125	0.0246765	SAMN30442748
8_1_Jan_SF_Bin108	d__Bacteria;p__UBA6262;c__UBA6262;o__WVXT01;f__WVXT01;g__WVXT01;s__	Elusimicrobia	70.66	6.06	1.313	0.0443901	SAMN30443063
8_1_Oct_SF_Bin55	d__Bacteria;p__UBA6262;c__UBA6262;o__WVXT01;f__WVXT01;g__WVXT01;s__	Elusimicrobia	78.18	9.36	1.501	0.0500449	SAMN30443218
24_Oct_SF_Bin18	d__Bacteria;p__Verrucomicrobiota;c__Kiritimatiellae;o__Kiritimatiellales;f__Pontiellaceae;g__Pontiella;s__	Kiritimatiellaeota	50.08	1.35	1.219	0.0324438	SAMN30442876
13_Jan_SF_Bin43	d__Bacteria;p__Verrucomicrobiota;c__Kiritimatiellae;o__Kiritimatiellales;f__Pontiellaceae;g__UBA5540;s__	Kiritimatiellaeota	52.84	4.51	0.827	0.0315584	SAMN30442626
4_1_July_SF_Bin39	d__Bacteria;p__WOR-3;c__WOR-3;o__SM23-42;f__SM23-42;g__SM23-42;s__	WOR-3	95.6	1.1	2.721	0.0439371	SAMN30442953
8_1_Jan_SF_Bin14	d__Bacteria;p__WOR-3;c__WOR-3;o__UBA2258;f__DTLI01;g__;s__	WOR-3	77.65	0.48	1.998	0.0329002	SAMN30443066
8_1_Oct_SF_Bin39	d__Bacteria;p__WOR-3;c__WOR-3;o__UBA2258;f__DTLI01;g__;s__	WOR-3	78.77	2.35	2.202	0.0359747	SAMN30443208
24_Jan_SF_Bin5	d__Bacteria;p__Zixibacteria;c__MSB-5A5;o__GN15;f__FEB-12;g__;s__	Zixibacteria	99.63	1.1	4.762	0.0300872	SAMN30442849
24_July_SF_Bin5	d__Bacteria;p__Zixibacteria;c__MSB-5A5;o__GN15;f__FEB-12;g__;s__	Zixibacteria	98.53	2.2	4.726	0.0292044	SAMN30442861
24_Oct_SF_Bin8	d__Bacteria;p__Zixibacteria;c__MSB-5A5;o__GN15;f__FEB-12;g__;s__	Zixibacteria	93.07	1.1	4.426	0.027753	SAMN30442892
4_1_July_SF_Bin17	d__Bacteria;p__Zixibacteria;c__MSB-5A5;o__GN15;f__FEB-12;g__;s__	Zixibacteria	93.34	2.2	3.405	0.0296516	SAMN30442938
4_1_July_SF_Bin42	d__Bacteria;p__Zixibacteria;c__MSB-5A5;o__MSB-5A5;f__RBG-16-43-9;g__;s__	Zixibacteria	87.48	1.65	2.206	0.033078	SAMN30442955
