# Supplementary material for: Metabolic capacity is maintained despite shifts in microbial diversity in estuary sediments
Source: Research Square preprint supplement (doi:10.21203/rs.3.rs-2838418/v1), 2023-04-20
Supplement: Supplementary file 4 [file SupplementaryTable5.xlsx]

## Sheet: Caption
Supplementary Table 5. SFB MAG dsrA, dsrB, narG, nxrA, rbcL, sqr, and hgc genes. The direction or type of these genes was determined from phylogenetic trees in Extended Data Figure 4 and Figure 4. The NarGNxrA sheet highlights sequences that had homology to NxrA sequences and thus may be of interest in future investigations.

## Sheet: DsrA
DsrA	MAG	GTDBtk	rDsrA
13_Jan_SF_Bin12_scaffold_1913_c1_1	13_Jan_SF_Bin12	d__Bacteria;p__Desulfobacterota;c__Desulfobulbia;o__Desulfobulbales;f__Desulfobulbaceae;g__;s__	No
13_Jan_SF_Bin14_scaffold_188_c1_4	13_Jan_SF_Bin14	d__Bacteria;p__Desulfobacterota;c__Desulfobulbia;o__Desulfobulbales;f__Desulfobulbaceae;g__;s__	No
13_Jan_SF_Bin30_scaffold_2436_c1_5	13_Jan_SF_Bin30	d__Bacteria;p__Desulfobacterota;c__Desulfobulbia;o__Desulfobulbales;f__BM004;g__BM004;s__BM004 sp002868955	No
13_Jan_SF_Bin31_scaffold_9363_c1_2	13_Jan_SF_Bin31	d__Bacteria;p__Desulfobacterota;c__Desulfobacteria;o__Desulfobacterales;f__UBA11574;g__JAAXQD01;s__	No
13_Jan_SF_Bin38_scaffold_314_c1_14	13_Jan_SF_Bin38	d__Bacteria;p__Desulfobacterota;c__Desulfobacteria;o__Desulfobacterales;f__UBA11574;g__UBA11574;s__UBA11574 sp002868985	No
13_Jan_SF_Bin49_scaffold_10177_c1_3	13_Jan_SF_Bin49	d__Bacteria;p__Desulfobacterota;c__Desulfobulbia;o__Desulfobulbales;f__Desulfurivibrionaceae;g__UBA5123;s__	No
13_Jan_SF_Bin49_scaffold_16029_c1_2	13_Jan_SF_Bin49	d__Bacteria;p__Desulfobacterota;c__Desulfobulbia;o__Desulfobulbales;f__Desulfurivibrionaceae;g__UBA5123;s__	No
13_Jan_SF_Bin49_scaffold_17622_c1_3	13_Jan_SF_Bin49	d__Bacteria;p__Desulfobacterota;c__Desulfobulbia;o__Desulfobulbales;f__Desulfurivibrionaceae;g__UBA5123;s__	No
13_Jan_SF_Bin54_scaffold_10742_c1_1	13_Jan_SF_Bin54	d__Bacteria;p__Desulfobacterota;c__Desulfobulbia;o__Desulfobulbales;f__Desulfurivibrionaceae;g__UBA5123;s__	No
13_Jan_SF_Bin54_scaffold_13156_c1_5	13_Jan_SF_Bin54	d__Bacteria;p__Desulfobacterota;c__Desulfobulbia;o__Desulfobulbales;f__Desulfurivibrionaceae;g__UBA5123;s__	No
13_Jan_SF_Bin54_scaffold_18653_c1_1	13_Jan_SF_Bin54	d__Bacteria;p__Desulfobacterota;c__Desulfobulbia;o__Desulfobulbales;f__Desulfurivibrionaceae;g__UBA5123;s__	No
13_Jan_SF_Bin8_scaffold_6064_c1_3	13_Jan_SF_Bin8	d__Bacteria;p__Desulfobacterota;c__Desulfobulbia;o__Desulfobulbales;f__BM004;g__BM004;s__BM004 sp012974315	No
13_Oct_SF_Bin15_scaffold_12095_c1_1	13_Oct_SF_Bin15	d__Bacteria;p__Desulfobacterota;c__Syntrophobacteria;o__BM002;f__BM002;g__BM002;s__BM002 sp002899795	No
13_Oct_SF_Bin29_scaffold_19289_c1_3	13_Oct_SF_Bin29	d__Bacteria;p__Desulfobacterota;c__Desulfobacteria;o__Desulfobacterales;f__UBA11574;g__JAAXQD01;s__	No
13_Oct_SF_Bin29_scaffold_7754_c1_1	13_Oct_SF_Bin29	d__Bacteria;p__Desulfobacterota;c__Desulfobacteria;o__Desulfobacterales;f__UBA11574;g__JAAXQD01;s__	No
13_Oct_SF_Bin32_scaffold_78_c1_3	13_Oct_SF_Bin32	d__Bacteria;p__Desulfobacterota;c__Desulfobacteria;o__Desulfobacterales;f__UBA11574;g__UBA11574;s__UBA11574 sp002868985	No
13_Oct_SF_Bin33_scaffold_80_c1_1	13_Oct_SF_Bin33	d__Bacteria;p__Desulfobacterota;c__Desulfobulbia;o__Desulfobulbales;f__BM004;g__BM004;s__BM004 sp002868955	No
21_July_SF_Bin1_scaffold_18_c1_15	21_July_SF_Bin1	d__Bacteria;p__Desulfobacterota;c__Desulfobacteria;o__Desulfobacterales;f__UBA11574;g__UBA11574;s__UBA11574 sp002868985	No
21_May_SF_Bin30_scaffold_378_c1_12	21_May_SF_Bin30	d__Bacteria;p__Desulfobacterota;c__Desulfobulbia;o__Desulfobulbales;f__BM004;g__BM004;s__BM004 sp002868955	No
21_May_SF_Bin32_scaffold_2516_c1_2	21_May_SF_Bin32	d__Bacteria;p__Desulfobacterota;c__Desulfobacteria;o__Desulfobacterales;f__;g__;s__	No
21_May_SF_Bin9_scaffold_546_c1_11	21_May_SF_Bin9	d__Bacteria;p__Desulfobacterota;c__Desulfobacteria;o__Desulfobacterales;f__UBA11574;g__UBA11574;s__UBA11574 sp002868985	No
21_Oct_SF_Bin14_scaffold_6220_c1_4	21_Oct_SF_Bin14	d__Bacteria;p__Desulfobacterota;c__Desulfobacteria;o__Desulfobacterales;f__UBA2174_A;g__;s__	No
21_Oct_SF_Bin17_scaffold_25_c1_15	21_Oct_SF_Bin17	d__Bacteria;p__Desulfobacterota;c__Desulfobacteria;o__Desulfobacterales;f__UBA11574;g__UBA11574;s__UBA11574 sp002868985	No
21_Oct_SF_Bin18_scaffold_1371_c1_2	21_Oct_SF_Bin18	d__Bacteria;p__Desulfobacterota;c__Desulfobulbia;o__Desulfobulbales;f__BM004;g__BM004;s__BM004 sp002868955	No
21_Oct_SF_Bin24_scaffold_5235_c1_2	21_Oct_SF_Bin24	d__Bacteria;p__Desulfobacterota;c__Syntrophobacteria;o__BM002;f__BM002;g__BM002;s__BM002 sp002899795	No
24_Jan_SF_Bin10_scaffold_7947_c1_4	24_Jan_SF_Bin10	d__Bacteria;p__Desulfobacterota;c__Desulfobacteria;o__Desulfobacterales;f__SG8-13;g__;s__	No
24_Jan_SF_Bin12_scaffold_13212_c1_1	24_Jan_SF_Bin12	d__Bacteria;p__Desulfobacterota;c__Desulfobacteria;o__Desulfobacterales;f__;g__;s__	No
24_Jan_SF_Bin12_scaffold_5375_c1_1	24_Jan_SF_Bin12	d__Bacteria;p__Desulfobacterota;c__Desulfobacteria;o__Desulfobacterales;f__;g__;s__	No
24_Jan_SF_Bin12_scaffold_7264_c1_4	24_Jan_SF_Bin12	d__Bacteria;p__Desulfobacterota;c__Desulfobacteria;o__Desulfobacterales;f__;g__;s__	No
24_Jan_SF_Bin13_scaffold_3742_c1_4	24_Jan_SF_Bin13	d__Bacteria;p__Desulfobacterota;c__Desulfobacteria;o__Desulfobacterales;f__UBA11574;g__UBA11574;s__UBA11574 sp002868985	No
24_Jan_SF_Bin17_scaffold_1726_c1_3	24_Jan_SF_Bin17	d__Bacteria;p__Desulfobacterota;c__Syntrophobacteria;o__BM002;f__BM002;g__BM002;s__BM002 sp002899795	No
24_May_SF_Bin33_scaffold_1518_c1_8	24_May_SF_Bin33	d__Bacteria;p__Desulfobacterota;c__Desulfobacteria;o__Desulfobacterales;f__UBA11574;g__UBA11574;s__UBA11574 sp002868985	No
24_Oct_SF_Bin1_scaffold_26787_c1_3	24_Oct_SF_Bin1	d__Bacteria;p__Desulfobacterota;c__Syntrophobacteria;o__BM002;f__BM002;g__BM002;s__BM002 sp002899795	No
24_Oct_SF_Bin38_scaffold_29899_c1_1	24_Oct_SF_Bin38	d__Bacteria;p__Desulfobacterota;c__Desulfobacteria;o__Desulfobacterales;f__SURF-15;g__;s__	No
4_1_Jan_SF_Bin35_4_1_Jan_bin_35_scaffold_17479_c1_2	4_1_Jan_SF_Bin35	d__Bacteria;p__Gemmatimonadota;c__Gemmatimonadetes;o__Gemmatimonadales;f__GWC2-71-9;g__;s__	No
4_1_July_SF_Bin47_4_1_July_bin_47_scaffold_1334_c1_1	4_1_July_SF_Bin47	d__Bacteria;p__Nitrospirota;c__Thermodesulfovibrionia;o__Thermodesulfovibrionales;f__UBA6898;g__GW-Nitrospira-1;s__	No
4_1_July_SF_Bin47_4_1_July_bin_47_scaffold_5941_c1_2	4_1_July_SF_Bin47	d__Bacteria;p__Nitrospirota;c__Thermodesulfovibrionia;o__Thermodesulfovibrionales;f__UBA6898;g__GW-Nitrospira-1;s__	No
4_1_July_SF_Bin55_4_1_July_bin_55_scaffold_4128_c1_3	4_1_July_SF_Bin55	d__Bacteria;p__Desulfobacterota;c__SM23-61;o__SM23-61;f__SM23-61;g__JAHJQK01;s__	No
4_1_July_SF_Bin60_4_1_July_bin_60_scaffold_22377_c1_4	4_1_July_SF_Bin60	d__Bacteria;p__Desulfobacterota;c__Desulfobacteria;o__Desulfobacterales;f__UBA11574;g__UBA11574;s__	No
4_1_May_SF_Bin4_scaffold_5324_c1_5	4_1_May_SF_Bin4	d__Bacteria;p__Desulfobacterota;c__Desulfobulbia;o__Desulfobulbales;f__Desulfobulbaceae;g__;s__	No
4_1_May_SF_Bin51_scaffold_35556_c1_1	4_1_May_SF_Bin51	d__Bacteria;p__Gemmatimonadota;c__Gemmatimonadetes;o__Gemmatimonadales;f__GWC2-71-9;g__;s__	No
4_1_May_SF_Bin57_scaffold_1892_c1_13	4_1_May_SF_Bin57	d__Bacteria;p__Desulfobacterota;c__Desulfobulbia;o__Desulfobulbales;f__Desulfurivibrionaceae;g__UBA5123;s__	No
4_1_May_SF_Bin58_scaffold_69_c1_37	4_1_May_SF_Bin58	d__Bacteria;p__Desulfobacterota;c__Desulfobulbia;o__Desulfobulbales;f__Desulfurivibrionaceae;g__UBA2262;s__UBA2262 sp013349295	No
4_1_May_SF_Bin9_scaffold_19556_c1_5	4_1_May_SF_Bin9	d__Bacteria;p__Desulfobacterota;c__Desulfobulbia;o__Desulfobulbales;f__Desulfurivibrionaceae;g__UBA5123;s__	No
4_1_Oct_SF_Bin44_scaffold_34668_c1_2	4_1_Oct_SF_Bin44	d__Bacteria;p__Gemmatimonadota;c__Gemmatimonadetes;o__Gemmatimonadales;f__GWC2-71-9;g__;s__	No
4_1_Oct_SF_Bin44_scaffold_34668_c1_3	4_1_Oct_SF_Bin44	d__Bacteria;p__Gemmatimonadota;c__Gemmatimonadetes;o__Gemmatimonadales;f__GWC2-71-9;g__;s__	No
8_1_Jan_SF_Bin13_scaffold_2600_c1_11	8_1_Jan_SF_Bin13	d__Bacteria;p__Nitrospirota;c__Thermodesulfovibrionia;o__Thermodesulfovibrionales;f__SM23-35;g__VGWZ01;s__	No
8_1_July_SF_Bin20_scaffold_1441_c1_8	8_1_July_SF_Bin20	d__Bacteria;p__Desulfobacterota;c__Desulfobulbia;o__Desulfobulbales;f__Desulfurivibrionaceae;g__DUZU01;s__DUZU01 sp013349285	No
8_1_Oct_SF_Bin79_scaffold_980_c1_10	8_1_Oct_SF_Bin79	d__Bacteria;p__Nitrospirota;c__Thermodesulfovibrionia;o__Thermodesulfovibrionales;f__SM23-35;g__VGWZ01;s__	No
4_1_July_SF_Bin20_4_1_July_bin_20_scaffold_772_c1_16	4_1_July_SF_Bin20	d__Bacteria;p__Nitrospirota;c__UBA9217;o__UBA9217;f__UBA9217;g__;s__	No
13_Jan_SF_Bin10_scaffold_20991_c1_1	13_Jan_SF_Bin10	d__Bacteria;p__Proteobacteria;c__Alphaproteobacteria;o__Rhodospirillales;f__Magnetovibrionaceae;g__;s__	Yes
13_Jan_SF_Bin10_scaffold_8429_c1_7	13_Jan_SF_Bin10	d__Bacteria;p__Proteobacteria;c__Alphaproteobacteria;o__Rhodospirillales;f__Magnetovibrionaceae;g__;s__	Yes
13_Jan_SF_Bin42_scaffold_749_c1_11	13_Jan_SF_Bin42	d__Bacteria;p__Proteobacteria;c__Gammaproteobacteria;o__Thiohalomonadales;f__Thiohalomonadaceae;g__;s__	Yes
13_Jan_SF_Bin58_scaffold_553_c1_13	13_Jan_SF_Bin58	d__Bacteria;p__Proteobacteria;c__Gammaproteobacteria;o__Woeseiales;f__Woeseiaceae;g__UBA1847;s__	Yes
13_Jan_SF_Bin62_scaffold_28534_c1_3	13_Jan_SF_Bin62	d__Bacteria;p__Proteobacteria;c__Gammaproteobacteria;o__Acidiferrobacterales;f__Sulfurifustaceae;g__Sulfuricaulis;s__	Yes
13_Jan_SF_Bin62_scaffold_29896_c1_1	13_Jan_SF_Bin62	d__Bacteria;p__Proteobacteria;c__Gammaproteobacteria;o__Acidiferrobacterales;f__Sulfurifustaceae;g__Sulfuricaulis;s__	Yes
13_July_SF_Bin1_scaffold_3034_c1_1	13_July_SF_Bin1	d__Bacteria;p__Proteobacteria;c__Gammaproteobacteria;o__Arenicellales;f__;g__;s__	Yes
13_July_SF_Bin23_scaffold_962_c1_13	13_July_SF_Bin23_1	d__Bacteria;p__Proteobacteria;c__Gammaproteobacteria;o__Woeseiales;f__Woeseiaceae;g__UBA1847;s__	Yes
13_July_SF_Bin31_scaffold_1731_c1_12	13_July_SF_Bin31	d__Bacteria;p__Proteobacteria;c__Gammaproteobacteria;o__UBA9214;f__UBA9214;g__SZUA-186;s__	Yes
13_July_SF_Bin35_scaffold_2010_c1_9	13_July_SF_Bin35	d__Bacteria;p__Proteobacteria;c__Gammaproteobacteria;o__GCA-001735895;f__GCA-001735895;g__GCA-001735895;s__	Yes
13_July_SF_Bin40_scaffold_1534_c1_1	13_July_SF_Bin40	d__Bacteria;p__Proteobacteria;c__Gammaproteobacteria;o__GCA-001735895;f__GCA-001735895;g__GCA-001735895;s__	Yes
13_July_SF_Bin40_scaffold_23110_c1_1	13_July_SF_Bin40	d__Bacteria;p__Proteobacteria;c__Gammaproteobacteria;o__GCA-001735895;f__GCA-001735895;g__GCA-001735895;s__	Yes
13_July_SF_Bin49_scaffold_777_c1_7	13_July_SF_Bin49	d__Bacteria;p__Proteobacteria;c__Gammaproteobacteria;o__Woeseiales;f__Woeseiaceae;g__JAACFB01;s__	Yes
13_July_SF_Bin52_scaffold_1132_c1_5	13_July_SF_Bin52	d__Bacteria;p__Proteobacteria;c__Gammaproteobacteria;o__Acidiferrobacterales;f__Sulfurifustaceae;g__Sulfuricaulis;s__	Yes
13_July_SF_Bin55_scaffold_25319_c1_4	13_July_SF_Bin55	d__Bacteria;p__Proteobacteria;c__Gammaproteobacteria;o__HK1;f__HK1;g__;s__	Yes
13_May_SF_Bin13_scaffold_5320_c1_10	13_May_SF_Bin13	d__Bacteria;p__Proteobacteria;c__Alphaproteobacteria;o__UBA8366;f__JADFVY01;g__JADFVY01;s__	Yes
13_May_SF_Bin22_scaffold_3649_c1_3	13_May_SF_Bin22	d__Bacteria;p__Proteobacteria;c__Gammaproteobacteria;o__Woeseiales;f__Woeseiaceae;g__JAACFB01;s__	Yes
13_May_SF_Bin41_scaffold_799_c1_27	13_May_SF_Bin41	d__Bacteria;p__Proteobacteria;c__Gammaproteobacteria;o__GCA-001735895;f__GCA-001735895;g__GCA-001735895;s__	Yes
13_May_SF_Bin53_scaffold_1525_c1_2	13_May_SF_Bin53	d__Bacteria;p__Proteobacteria;c__Gammaproteobacteria;o__Woeseiales;f__Woeseiaceae;g__JAACFB01;s__	Yes
13_May_SF_Bin65_scaffold_250_c1_40	13_May_SF_Bin65	d__Bacteria;p__Proteobacteria;c__Gammaproteobacteria;o__Woeseiales;f__Woeseiaceae;g__UBA1847;s__	Yes
13_May_SF_Bin7_scaffold_626_c1_26	13_May_SF_Bin7	d__Bacteria;p__Proteobacteria;c__Gammaproteobacteria;o__Burkholderiales;f__SG8-39;g__JAABQT01;s__	Yes
13_May_SF_Bin71_scaffold_488_c1_24	13_May_SF_Bin71	d__Bacteria;p__Proteobacteria;c__Gammaproteobacteria;o__Acidiferrobacterales;f__Sulfurifustaceae;g__Sulfuricaulis;s__	Yes
13_May_SF_Bin80_scaffold_6144_c1_9	13_May_SF_Bin80	d__Bacteria;p__Proteobacteria;c__Gammaproteobacteria;o__Arenicellales;f__;g__;s__	Yes
13_May_SF_Bin88_scaffold_28511_c1_7	13_May_SF_Bin88	d__Bacteria;p__Proteobacteria;c__Gammaproteobacteria;o__Acidiferrobacterales;f__Sulfurifustaceae;g__Sulfuricaulis;s__	Yes
13_May_SF_Bin88_scaffold_56107_c1_1	13_May_SF_Bin88	d__Bacteria;p__Proteobacteria;c__Gammaproteobacteria;o__Acidiferrobacterales;f__Sulfurifustaceae;g__Sulfuricaulis;s__	Yes
13_Oct_SF_Bin20_scaffold_28937_c1_3	13_Oct_SF_Bin20	d__Bacteria;p__Proteobacteria;c__Gammaproteobacteria;o__UBA9214;f__UBA9214;g__SZUA-186;s__	Yes
13_Oct_SF_Bin20_scaffold_3855_c1_1	13_Oct_SF_Bin20	d__Bacteria;p__Proteobacteria;c__Gammaproteobacteria;o__UBA9214;f__UBA9214;g__SZUA-186;s__	Yes
13_Oct_SF_Bin7_scaffold_3061_c1_8	13_Oct_SF_Bin7	d__Bacteria;p__Proteobacteria;c__Gammaproteobacteria;o__Acidiferrobacterales;f__Sulfurifustaceae;g__Sulfuricaulis;s__	Yes
13_Oct_SF_Bin7_scaffold_9302_c1_1	13_Oct_SF_Bin7	d__Bacteria;p__Proteobacteria;c__Gammaproteobacteria;o__Acidiferrobacterales;f__Sulfurifustaceae;g__Sulfuricaulis;s__	Yes
21_Jan_SF_Bin10_scaffold_2894_c1_6	21_Jan_SF_Bin10	d__Bacteria;p__Proteobacteria;c__Alphaproteobacteria;o__Kiloniellales;f__J153;g__;s__	Yes
21_Jan_SF_Bin30_scaffold_98_c1_42	21_Jan_SF_Bin30	d__Bacteria;p__Proteobacteria;c__Gammaproteobacteria;o__GCA-001735895;f__GCA-001735895;g__GCA-001735895;s__	Yes
21_Jan_SF_Bin34_scaffold_16341_c1_4	21_Jan_SF_Bin34	d__Bacteria;p__Proteobacteria;c__Gammaproteobacteria;o__UBA4575;f__UBA4575;g__JABDMD01;s__JABDMD01 sp013001685	Yes
21_Jan_SF_Bin37_scaffold_274_c1_25	21_Jan_SF_Bin37	d__Bacteria;p__Proteobacteria;c__Gammaproteobacteria;o__GCA-001735895;f__GCA-001735895;g__GCA-001735895;s__	Yes
21_Jan_SF_Bin38_scaffold_91_c1_46	21_Jan_SF_Bin38	d__Bacteria;p__Proteobacteria;c__Gammaproteobacteria;o__Woeseiales;f__Woeseiaceae;g__JAACFB01;s__	Yes
21_Jan_SF_Bin39_scaffold_17967_c1_1	21_Jan_SF_Bin39	d__Bacteria;p__Proteobacteria;c__Gammaproteobacteria;o__Arenicellales;f__JAANXG01;g__;s__	Yes
21_Jan_SF_Bin41_scaffold_23057_c1_1	21_Jan_SF_Bin41	d__Bacteria;p__Proteobacteria;c__Gammaproteobacteria;o__Woeseiales;f__Woeseiaceae;g__UBA1847;s__	Yes
21_Jan_SF_Bin47_scaffold_14874_c1_4	21_Jan_SF_Bin47	d__Bacteria;p__Proteobacteria;c__Gammaproteobacteria;o__Acidiferrobacterales;f__SPGG2;g__SPGG2;s__	Yes
21_Jan_SF_Bin54_scaffold_55014_c1_1	21_Jan_SF_Bin54	d__Bacteria;p__Proteobacteria;c__Gammaproteobacteria;o__Arenicellales;f__RKSH01;g__;s__	Yes
21_Jan_SF_Bin69_scaffold_838_c1_26	21_Jan_SF_Bin69	d__Bacteria;p__Proteobacteria;c__Gammaproteobacteria;o__GCA-001735895;f__GCA-001735895;g__GCA-001735895;s__	Yes
21_July_SF_Bin13_scaffold_595_c1_9	21_July_SF_Bin13	d__Bacteria;p__Proteobacteria;c__Gammaproteobacteria;o__Woeseiales;f__Woeseiaceae;g__JAACFB01;s__	Yes
21_May_SF_Bin21_scaffold_15110_c1_1	21_May_SF_Bin21	d__Bacteria;p__Proteobacteria;c__Gammaproteobacteria;o__Woeseiales;f__Woeseiaceae;g__JAACFB01;s__	Yes
21_May_SF_Bin33_scaffold_1985_c1_7	21_May_SF_Bin33	d__Bacteria;p__Proteobacteria;c__Alphaproteobacteria;o__Kiloniellales;f__J153;g__;s__	Yes
21_Oct_SF_Bin2_scaffold_18614_c1_2	21_Oct_SF_Bin2	d__Bacteria;p__Proteobacteria;c__Gammaproteobacteria;o__UBA9214;f__UBA9214;g__SZUA-186;s__	Yes
21_Oct_SF_Bin2_scaffold_9035_c1_1	21_Oct_SF_Bin2	d__Bacteria;p__Proteobacteria;c__Gammaproteobacteria;o__UBA9214;f__UBA9214;g__SZUA-186;s__	Yes
21_Oct_SF_Bin23_scaffold_5227_c1_4	21_Oct_SF_Bin23	d__Bacteria;p__Proteobacteria;c__Gammaproteobacteria;o__GCA-001735895;f__GCA-001735895;g__GCA-001735895;s__	Yes
24_Jan_SF_Bin10_scaffold_8929_c1_4	24_Jan_SF_Bin10	d__Bacteria;p__Desulfobacterota;c__Desulfobacteria;o__Desulfobacterales;f__SG8-13;g__;s__	Yes
24_Jan_SF_Bin23_scaffold_915_c1_7	24_Jan_SF_Bin23	d__Bacteria;p__Proteobacteria;c__Alphaproteobacteria;o__Kiloniellales;f__J153;g__;s__	Yes
24_Jan_SF_Bin6_scaffold_963_c1_8	24_Jan_SF_Bin6	d__Bacteria;p__Proteobacteria;c__Gammaproteobacteria;o__UBA9214;f__UBA9214;g__UBA9214;s__	Yes
24_July_SF_Bin11_scaffold_3088_c1_8	24_July_SF_Bin11	d__Bacteria;p__Proteobacteria;c__Gammaproteobacteria;o__Xanthomonadales;f__SZUA-36;g__SZUA-36;s__	Yes
24_July_SF_Bin17_scaffold_10868_c1_1	24_July_SF_Bin17	d__Bacteria;p__Proteobacteria;c__Alphaproteobacteria;o__Kiloniellales;f__J153;g__;s__	Yes
24_July_SF_Bin20_scaffold_15593_c1_1	24_July_SF_Bin20	d__Bacteria;p__Proteobacteria;c__Gammaproteobacteria;o__UBA9214;f__UBA9214;g__UBA9214;s__	Yes
24_May_SF_Bin18_scaffold_44_c1_12	24_May_SF_Bin18	d__Bacteria;p__Proteobacteria;c__Gammaproteobacteria;o__UBA9214;f__UBA9214;g__UBA9214;s__	Yes
24_May_SF_Bin29_scaffold_22110_c1_1	24_May_SF_Bin29	d__Bacteria;p__Proteobacteria;c__Gammaproteobacteria;o__UBA6429;f__UBA6429;g__;s__	Yes
24_Oct_SF_Bin19_scaffold_224_c1_8	24_Oct_SF_Bin19	d__Bacteria;p__Proteobacteria;c__Alphaproteobacteria;o__Kiloniellales;f__J153;g__;s__	Yes
24_Oct_SF_Bin33_scaffold_12861_c1_1	24_Oct_SF_Bin33	d__Bacteria;p__Proteobacteria;c__Gammaproteobacteria;o__UBA9214;f__UBA9214;g__UBA9214;s__	Yes
24_Oct_SF_Bin7_scaffold_662_c1_7	24_Oct_SF_Bin7	d__Bacteria;p__Proteobacteria;c__Gammaproteobacteria;o__Xanthomonadales;f__SZUA-36;g__SZUA-36;s__	Yes
4_1_Jan_SF_Bin33_4_1_Jan_bin_33_scaffold_25232_c1_5	4_1_Jan_SF_Bin33	d__Bacteria;p__Proteobacteria;c__Gammaproteobacteria;o__Burkholderiales;f__Burkholderiaceae;g__CADEEN01;s__	Yes
4_1_Jan_SF_Bin33_4_1_Jan_bin_33_scaffold_8015_c1_1	4_1_Jan_SF_Bin33	d__Bacteria;p__Proteobacteria;c__Gammaproteobacteria;o__Burkholderiales;f__Burkholderiaceae;g__CADEEN01;s__	Yes
4_1_Jan_SF_Bin54_4_1_Jan_bin_54_scaffold_10266_c1_8	4_1_Jan_SF_Bin54	d__Bacteria;p__Proteobacteria;c__Gammaproteobacteria;o__Burkholderiales;f__SG8-39;g__JAABQT01;s__	Yes
4_1_Jan_SF_Bin54_4_1_Jan_bin_54_scaffold_21493_c1_4	4_1_Jan_SF_Bin54	d__Bacteria;p__Proteobacteria;c__Gammaproteobacteria;o__Burkholderiales;f__SG8-39;g__JAABQT01;s__	Yes
4_1_Jan_SF_Bin64_4_1_Jan_bin_64_scaffold_8880_c1_2	4_1_Jan_SF_Bin64	d__Bacteria;p__Proteobacteria;c__Gammaproteobacteria;o__Burkholderiales;f__Burkholderiaceae;g__;s__	Yes
4_1_Jan_SF_Bin8_4_1_Jan_bin_8_scaffold_22195_c1_1	4_1_Jan_SF_Bin8	d__Bacteria;p__Proteobacteria;c__Gammaproteobacteria;o__Burkholderiales;f__Casimicrobiaceae;g__VBCG01;s__	Yes
4_1_July_SF_Bin12_4_1_July_bin_12_scaffold_10941_c1_2	4_1_July_SF_Bin12	d__Bacteria;p__Proteobacteria;c__Gammaproteobacteria;o__Acidiferrobacterales;f__UBA6901;g__UBA6901;s__	Yes
4_1_July_SF_Bin25_4_1_July_bin_25_scaffold_2668_c1_7	4_1_July_SF_Bin25	d__Bacteria;p__Spirochaetota;c__UBA6919;o__UBA6919;f__UBA6919;g__;s__	Yes
4_1_July_SF_Bin28_4_1_July_bin_28_scaffold_10959_c1_7	4_1_July_SF_Bin28	d__Bacteria;p__Proteobacteria;c__Gammaproteobacteria;o__Burkholderiales;f__SG8-39;g__SG8-39;s__	Yes
4_1_July_SF_Bin31_4_1_July_bin_31_scaffold_25971_c1_2	4_1_July_SF_Bin31	d__Bacteria;p__Spirochaetota;c__Leptospirae;o__Turneriellales;f__;g__;s__	Yes
4_1_July_SF_Bin47_4_1_July_bin_47_scaffold_20678_c1_6	4_1_July_SF_Bin47	d__Bacteria;p__Nitrospirota;c__Thermodesulfovibrionia;o__Thermodesulfovibrionales;f__UBA6898;g__GW-Nitrospira-1;s__	Yes
4_1_July_SF_Bin48_4_1_July_bin_48_scaffold_5068_c1_2	4_1_July_SF_Bin48	d__Bacteria;p__SAR324;c__SAR324;o__SAR324;f__;g__;s__	Yes
4_1_July_SF_Bin56_4_1_July_bin_56_scaffold_222_c1_4	4_1_July_SF_Bin56	d__Bacteria;p__Spirochaetota;c__Leptospirae;o__Turneriellales;f__;g__;s__	Yes
4_1_July_SF_Bin6_4_1_July_bin_6_scaffold_25771_c1_3	4_1_July_SF_Bin6	d__Bacteria;p__Proteobacteria;c__Gammaproteobacteria;o__Burkholderiales;f__Gallionellaceae;g__Gallionella;s__	Yes
4_1_July_SF_Bin9_4_1_July_bin_9_scaffold_3345_c1_6	4_1_July_SF_Bin9	d__Bacteria;p__Proteobacteria;c__Gammaproteobacteria;o__S140-43;f__S140-43;g__;s__	Yes
4_1_May_SF_Bin13_scaffold_48432_c1_4	4_1_May_SF_Bin13	d__Bacteria;p__Proteobacteria;c__Gammaproteobacteria;o__Burkholderiales;f__Gallionellaceae;g__Gallionella;s__	Yes
4_1_May_SF_Bin26_scaffold_9346_c1_2	4_1_May_SF_Bin26	d__Bacteria;p__Proteobacteria;c__Gammaproteobacteria;o__Burkholderiales;f__Gallionellaceae;g__VIKH01;s__	Yes
4_1_May_SF_Bin30_scaffold_1429_c1_8	4_1_May_SF_Bin30	d__Bacteria;p__Proteobacteria;c__Gammaproteobacteria;o__Burkholderiales;f__Burkholderiaceae;g__CADEEN01;s__	Yes
4_1_May_SF_Bin30_scaffold_24219_c1_6	4_1_May_SF_Bin30	d__Bacteria;p__Proteobacteria;c__Gammaproteobacteria;o__Burkholderiales;f__Burkholderiaceae;g__CADEEN01;s__	Yes
4_1_May_SF_Bin49_scaffold_33966_c1_4	4_1_May_SF_Bin49	d__Bacteria;p__Proteobacteria;c__Gammaproteobacteria;o__Burkholderiales;f__SG8-39;g__JAABQT01;s__	Yes
4_1_May_SF_Bin65_scaffold_10864_c1_7	4_1_May_SF_Bin65	d__Bacteria;p__Proteobacteria;c__Gammaproteobacteria;o__Burkholderiales;f__SG8-39;g__JAABQT01;s__	Yes
4_1_Oct_SF_Bin16_scaffold_303_c1_27	4_1_Oct_SF_Bin16	d__Bacteria;p__Proteobacteria;c__Gammaproteobacteria;o__Burkholderiales;f__Casimicrobiaceae;g__VBCG01;s__	Yes
4_1_Oct_SF_Bin27_scaffold_1183_c1_1	4_1_Oct_SF_Bin27	d__Bacteria;p__Proteobacteria;c__Gammaproteobacteria;o__Burkholderiales;f__SG8-39;g__JAABQT01;s__	Yes
4_1_Oct_SF_Bin28_scaffold_1918_c1_12	4_1_Oct_SF_Bin28	d__Bacteria;p__Proteobacteria;c__Gammaproteobacteria;o__Burkholderiales;f__Burkholderiaceae;g__CADEEN01;s__	Yes
4_1_Oct_SF_Bin31_scaffold_10596_c1_6	4_1_Oct_SF_Bin31	d__Bacteria;p__Proteobacteria;c__Gammaproteobacteria;o__Burkholderiales;f__Burkholderiaceae;g__Rubrivivax;s__	Yes
4_1_Oct_SF_Bin40_scaffold_25377_c1_1	4_1_Oct_SF_Bin40	d__Bacteria;p__Proteobacteria;c__Gammaproteobacteria;o__Burkholderiales;f__Usitatibacteraceae;g__FEB-7;s__	Yes
4_1_Oct_SF_Bin49_scaffold_24056_c1_1	4_1_Oct_SF_Bin49	d__Bacteria;p__Proteobacteria;c__Gammaproteobacteria;o__Burkholderiales;f__Casimicrobiaceae;g__CAIWHR01;s__	Yes
4_1_Oct_SF_Bin51_scaffold_2772_c1_8	4_1_Oct_SF_Bin51	d__Bacteria;p__Proteobacteria;c__Gammaproteobacteria;o__Burkholderiales;f__Burkholderiaceae;g__;s__	Yes
8_1_Jan_SF_Bin9_scaffold_13284_c1_1	8_1_Jan_SF_Bin9	d__Bacteria;p__Nitrospinota;c__UBA7883;o__UBA7883;f__UBA7883;g__;s__	Yes
8_1_Jan_SF_Bin9_scaffold_20219_c1_4	8_1_Jan_SF_Bin9	d__Bacteria;p__Nitrospinota;c__UBA7883;o__UBA7883;f__UBA7883;g__;s__	Yes
8_1_Jan_SF_Bin18_scaffold_2076_c1_2	8_1_Jan_SF_Bin18	d__Bacteria;p__Proteobacteria;c__Alphaproteobacteria;o__Rhodospirillales;f__Magnetovibrionaceae;g__;s__	Yes
8_1_Jan_SF_Bin95_scaffold_3356_c1_8	8_1_Jan_SF_Bin95	d__Bacteria;p__Proteobacteria;c__Alphaproteobacteria;o__Rhodospirillales;f__Magnetovibrionaceae;g__;s__	Yes
8_1_Jan_SF_Bin60_scaffold_79325_c1_2	8_1_Jan_SF_Bin60	d__Bacteria;p__Proteobacteria;c__Alphaproteobacteria;o__UBA8366;f__JADFVY01;g__JADFVY01;s__	Yes
8_1_Jan_SF_Bin19_scaffold_98_c1_46	8_1_Jan_SF_Bin19	d__Bacteria;p__Proteobacteria;c__Gammaproteobacteria;o__AKS1;f__AKS1;g__;s__	Yes
8_1_Jan_SF_Bin75_scaffold_28381_c1_3	8_1_Jan_SF_Bin75	d__Bacteria;p__Proteobacteria;c__Gammaproteobacteria;o__AKS1;f__AKS1;g__;s__	Yes
8_1_Jan_SF_Bin107_scaffold_6754_c1_7	8_1_Jan_SF_Bin107	d__Bacteria;p__Proteobacteria;c__Gammaproteobacteria;o__Burkholderiales;f__Burkholderiaceae;g__Hylemonella;s__	Yes
8_1_Jan_SF_Bin27_scaffold_15869_c1_1	8_1_Jan_SF_Bin27	d__Bacteria;p__Proteobacteria;c__Gammaproteobacteria;o__GCA-001735895;f__GCA-001735895;g__GCA-001735895;s__	Yes
8_1_Jan_SF_Bin27_scaffold_6094_c1_1	8_1_Jan_SF_Bin27	d__Bacteria;p__Proteobacteria;c__Gammaproteobacteria;o__GCA-001735895;f__GCA-001735895;g__GCA-001735895;s__	Yes
8_1_Jan_SF_Bin1_scaffold_27829_c1_4	8_1_Jan_SF_Bin1	d__Bacteria;p__Proteobacteria;c__Gammaproteobacteria;o__S140-43;f__S140-43;g__;s__	Yes
8_1_Jan_SF_Bin103_scaffold_1429_c1_14	8_1_Jan_SF_Bin103	d__Bacteria;p__Proteobacteria;c__Gammaproteobacteria;o__S140-43;f__S140-43;g__;s__	Yes
8_1_Jan_SF_Bin23_scaffold_18_c1_90	8_1_Jan_SF_Bin23	d__Bacteria;p__Proteobacteria;c__Gammaproteobacteria;o__SZUA-152;f__SZUA-152;g__;s__	Yes
8_1_Jan_SF_Bin54_scaffold_53_c1_99	8_1_Jan_SF_Bin54	d__Bacteria;p__Proteobacteria;c__Gammaproteobacteria;o__SZUA-229;f__SZUA-229;g__;s__	Yes
8_1_Jan_SF_Bin65_scaffold_188_c1_10	8_1_Jan_SF_Bin65	d__Bacteria;p__Proteobacteria;c__Gammaproteobacteria;o__SZUA-229;f__SZUA-229;g__;s__	Yes
8_1_Jan_SF_Bin98_scaffold_3_c1_176	8_1_Jan_SF_Bin98	d__Bacteria;p__Proteobacteria;c__Gammaproteobacteria;o__SZUA-229;f__SZUA-229;g__;s__	Yes
8_1_Jan_SF_Bin56_scaffold_47_c1_36	8_1_Jan_SF_Bin56	d__Bacteria;p__Proteobacteria;c__Gammaproteobacteria;o__SZUA-229;f__SZUA-229;g__SZUA-116;s__	Yes
8_1_Jan_SF_Bin105_scaffold_14514_c1_8	8_1_Jan_SF_Bin105	d__Bacteria;p__Proteobacteria;c__Gammaproteobacteria;o__UBA6429;f__UBA6429;g__;s__	Yes
8_1_Jan_SF_Bin105_scaffold_2079_c1_1	8_1_Jan_SF_Bin105	d__Bacteria;p__Proteobacteria;c__Gammaproteobacteria;o__UBA6429;f__UBA6429;g__;s__	Yes
8_1_Jan_SF_Bin39_scaffold_11473_c1_2	8_1_Jan_SF_Bin39	d__Bacteria;p__Proteobacteria;c__Gammaproteobacteria;o__UBA6429;f__UBA6429;g__;s__	Yes
8_1_Jan_SF_Bin63_scaffold_14389_c1_2	8_1_Jan_SF_Bin63	d__Bacteria;p__Proteobacteria;c__Gammaproteobacteria;o__UBA6429;f__UBA6429;g__;s__	Yes
8_1_Jan_SF_Bin82_scaffold_15_c1_57	8_1_Jan_SF_Bin82	d__Bacteria;p__Proteobacteria;c__Gammaproteobacteria;o__UBA6429;f__UBA6429;g__;s__	Yes
8_1_Jan_SF_Bin53_scaffold_2132_c1_6	8_1_Jan_SF_Bin53	d__Bacteria;p__Proteobacteria;c__Gammaproteobacteria;o__UBA9214;f__UBA9214;g__UBA9214;s__	Yes
8_1_July_SF_Bin34_scaffold_19_c1_47	8_1_July_SF_Bin34	d__Bacteria;p__Nitrospinota;c__UBA7883;o__JACRGQ01;f__;g__;s__	Yes
8_1_July_SF_Bin48_scaffold_318_c1_16	8_1_July_SF_Bin48	d__Bacteria;p__Nitrospinota;c__UBA7883;o__UBA7883;f__UBA7883;g__;s__	Yes
8_1_July_SF_Bin13_scaffold_14832_c1_3	8_1_July_SF_Bin13	d__Bacteria;p__Proteobacteria;c__Gammaproteobacteria;o__Acidiferrobacterales;f__Sulfurifustaceae;g__Sulfuricaulis;s__	Yes
8_1_July_SF_Bin13_scaffold_16842_c1_2	8_1_July_SF_Bin13	d__Bacteria;p__Proteobacteria;c__Gammaproteobacteria;o__Acidiferrobacterales;f__Sulfurifustaceae;g__Sulfuricaulis;s__	Yes
8_1_July_SF_Bin39_scaffold_3796_c1_4	8_1_July_SF_Bin39	d__Bacteria;p__Proteobacteria;c__Gammaproteobacteria;o__Acidiferrobacterales;f__Sulfurifustaceae;g__Sulfuricaulis;s__	Yes
8_1_July_SF_Bin24_scaffold_16178_c1_1	8_1_July_SF_Bin24	d__Bacteria;p__Proteobacteria;c__Gammaproteobacteria;o__Burkholderiales;f__Burkholderiaceae;g__LMDS01;s__	Yes
8_1_July_SF_Bin55_scaffold_17_c1_101	8_1_July_SF_Bin55	d__Bacteria;p__Proteobacteria;c__Gammaproteobacteria;o__S140-43;f__S140-43;g__;s__	Yes
8_1_July_SF_Bin40_scaffold_4378_c1_2	8_1_July_SF_Bin40	d__Bacteria;p__Proteobacteria;c__Gammaproteobacteria;o__SZUA-229;f__SZUA-229;g__;s__	Yes
8_1_July_SF_Bin54_scaffold_266_c1_10	8_1_July_SF_Bin54	d__Bacteria;p__Proteobacteria;c__Gammaproteobacteria;o__SZUA-229;f__SZUA-229;g__;s__	Yes
8_1_July_SF_Bin66_scaffold_306_c1_32	8_1_July_SF_Bin66	d__Bacteria;p__Proteobacteria;c__Gammaproteobacteria;o__SZUA-229;f__SZUA-229;g__SZUA-116;s__	Yes
8_1_July_SF_Bin57_scaffold_3010_c1_11	8_1_July_SF_Bin57	d__Bacteria;p__Proteobacteria;c__Gammaproteobacteria;o__UBA6429;f__UBA6429;g__;s__	Yes
8_1_July_SF_Bin11_scaffold_5314_c1_2	8_1_July_SF_Bin11	d__Bacteria;p__Proteobacteria;c__Gammaproteobacteria;o__UBA9214;f__UBA9214;g__UBA9214;s__	Yes
8_1_July_SF_Bin26_scaffold_1830_c1_16	8_1_July_SF_Bin26	d__Bacteria;p__SAR324;c__SAR324;o__XYD2-FULL-50-16;f__XYD2-FULL-50-16;g__;s__	Yes
8_1_July_SF_Bin26_scaffold_284_c1_40	8_1_July_SF_Bin26	d__Bacteria;p__SAR324;c__SAR324;o__XYD2-FULL-50-16;f__XYD2-FULL-50-16;g__;s__	Yes
8_1_May_SF_Bin11_scaffold_21281_c1_6	8_1_May_SF_Bin11	d__Bacteria;p__Nitrospinota;c__UBA7883;o__UBA7883;f__UBA7883;g__;s__	Yes
8_1_May_SF_Bin11_scaffold_84587_c1_1	8_1_May_SF_Bin11	d__Bacteria;p__Nitrospinota;c__UBA7883;o__UBA7883;f__UBA7883;g__;s__	Yes
8_1_May_SF_Bin12_scaffold_8_c2_96	8_1_May_SF_Bin12	d__Bacteria;p__Proteobacteria;c__Gammaproteobacteria;o__UBA6429;f__UBA6429;g__;s__	Yes
8_1_May_SF_Bin17_scaffold_17036_c1_6	8_1_May_SF_Bin17	d__Bacteria;p__Nitrospinota;c__UBA7883;o__UBA7883;f__UBA7883;g__;s__	Yes
8_1_May_SF_Bin19_scaffold_33_c1_19	8_1_May_SF_Bin19	d__Bacteria;p__Proteobacteria;c__Gammaproteobacteria;o__Acidiferrobacterales;f__SZUA-150;g__;s__	Yes
8_1_Oct_SF_Bin59_scaffold_10970_c1_1	8_1_Oct_SF_Bin59	d__Bacteria;p__Nitrospinota;c__UBA7883;o__UBA7883;f__UBA7883;g__;s__	Yes
8_1_Oct_SF_Bin92_scaffold_37482_c1_4	8_1_Oct_SF_Bin92	d__Bacteria;p__Proteobacteria;c__Alphaproteobacteria;o__Rhodobacterales;f__Rhodobacteraceae;g__S012-89;s__	Yes
8_1_Oct_SF_Bin68_scaffold_65700_c1_1	8_1_Oct_SF_Bin68	d__Bacteria;p__Proteobacteria;c__Alphaproteobacteria;o__Rhodospirillales;f__2-02-FULL-58-16;g__;s__	Yes
8_1_Oct_SF_Bin68_scaffold_77612_c1_3	8_1_Oct_SF_Bin68	d__Bacteria;p__Proteobacteria;c__Alphaproteobacteria;o__Rhodospirillales;f__2-02-FULL-58-16;g__;s__	Yes
8_1_Oct_SF_Bin102_scaffold_12_c1_27	8_1_Oct_SF_Bin102	d__Bacteria;p__Proteobacteria;c__Gammaproteobacteria;o__Acidiferrobacterales;f__SZUA-150;g__;s__	Yes
8_1_Oct_SF_Bin104_scaffold_2779_c1_2	8_1_Oct_SF_Bin104	d__Bacteria;p__Proteobacteria;c__Gammaproteobacteria;o__AKS1;f__AKS1;g__;s__	Yes
8_1_Oct_SF_Bin56_scaffold_7644_c1_9	8_1_Oct_SF_Bin56	d__Bacteria;p__Proteobacteria;c__Gammaproteobacteria;o__Burkholderiales;f__Burkholderiaceae;g__Hylemonella;s__	Yes
8_1_Oct_SF_Bin3_scaffold_11267_c1_3	8_1_Oct_SF_Bin3	d__Bacteria;p__Proteobacteria;c__Gammaproteobacteria;o__S140-43;f__S140-43;g__;s__	Yes
8_1_Oct_SF_Bin98_scaffold_148_c1_8	8_1_Oct_SF_Bin98	d__Bacteria;p__Proteobacteria;c__Gammaproteobacteria;o__SZUA-152;f__SZUA-152;g__;s__	Yes
8_1_Oct_SF_Bin73_scaffold_59078_c1_1	8_1_Oct_SF_Bin73	d__Bacteria;p__Proteobacteria;c__Gammaproteobacteria;o__SZUA-229;f__SZUA-229;g__;s__	Yes
8_1_Oct_SF_Bin34_scaffold_643_c2_2	8_1_Oct_SF_Bin34	d__Bacteria;p__Proteobacteria;c__Gammaproteobacteria;o__SZUA-229;f__SZUA-229;g__SZUA-116;s__	Yes
8_1_Oct_SF_Bin95_scaffold_26402_c1_7	8_1_Oct_SF_Bin95	d__Bacteria;p__Proteobacteria;c__Gammaproteobacteria;o__Thiohalomonadales;f__Thiohalomonadaceae;g__;s__	Yes
8_1_Oct_SF_Bin95_scaffold_43264_c1_1	8_1_Oct_SF_Bin95	d__Bacteria;p__Proteobacteria;c__Gammaproteobacteria;o__Thiohalomonadales;f__Thiohalomonadaceae;g__;s__	Yes
8_1_Oct_SF_Bin95_scaffold_4489_c1_1	8_1_Oct_SF_Bin95	d__Bacteria;p__Proteobacteria;c__Gammaproteobacteria;o__Thiohalomonadales;f__Thiohalomonadaceae;g__;s__	Yes
8_1_Oct_SF_Bin111_scaffold_6938_c1_1	8_1_Oct_SF_Bin111	d__Bacteria;p__Proteobacteria;c__Gammaproteobacteria;o__UBA6429;f__UBA6429;g__;s__	Yes
8_1_Oct_SF_Bin18_scaffold_55076_c1_2	8_1_Oct_SF_Bin18	d__Bacteria;p__Proteobacteria;c__Gammaproteobacteria;o__UBA6429;f__UBA6429;g__;s__	Yes
8_1_Oct_SF_Bin77_scaffold_18275_c1_8	8_1_Oct_SF_Bin77	d__Bacteria;p__Proteobacteria;c__Gammaproteobacteria;o__UBA6429;f__UBA6429;g__;s__	Yes
8_1_Oct_SF_Bin72_scaffold_5590_c1_8	8_1_Oct_SF_Bin72	d__Bacteria;p__SAR324;c__SAR324;o__SAR324;f__;g__;s__	Yes
8_1_Oct_SF_Bin1_scaffold_20461_c2_2	8_1_Oct_SF_Bin1	d__Bacteria;p__Spirochaetota;c__Leptospirae;o__Leptospirales;f__Leptonemataceae;g__;s__	Yes
8_1_Oct_SF_Bin4_scaffold_82749_c1_3	8_1_Oct_SF_Bin4	d__Bacteria;p__Spirochaetota;c__UBA6919;o__UBA6919;f__UBA6919;g__;s__	Yes

## Sheet: DsrB
DsrB	MAG	GTDBtk	rDsrB
13_Jan_SF_Bin12_scaffold_1913_c1_2	13_Jan_SF_Bin12	d__Bacteria;p__Desulfobacterota;c__Desulfobulbia;o__Desulfobulbales;f__Desulfobulbaceae;g__;s__	No
13_Jan_SF_Bin14_scaffold_188_c1_3	13_Jan_SF_Bin14	d__Bacteria;p__Desulfobacterota;c__Desulfobulbia;o__Desulfobulbales;f__Desulfobulbaceae;g__;s__	No
13_Jan_SF_Bin31_scaffold_9363_c1_3	13_Jan_SF_Bin31	d__Bacteria;p__Desulfobacterota;c__Desulfobacteria;o__Desulfobacterales;f__UBA11574;g__JAAXQD01;s__	No
13_Jan_SF_Bin38_scaffold_314_c1_13	13_Jan_SF_Bin38	d__Bacteria;p__Desulfobacterota;c__Desulfobacteria;o__Desulfobacterales;f__UBA11574;g__UBA11574;s__UBA11574 sp002868985	No
13_Jan_SF_Bin49_scaffold_16029_c1_1	13_Jan_SF_Bin49	d__Bacteria;p__Desulfobacterota;c__Desulfobulbia;o__Desulfobulbales;f__Desulfurivibrionaceae;g__UBA5123;s__	No
13_Jan_SF_Bin49_scaffold_17622_c1_2	13_Jan_SF_Bin49	d__Bacteria;p__Desulfobacterota;c__Desulfobulbia;o__Desulfobulbales;f__Desulfurivibrionaceae;g__UBA5123;s__	No
13_Jan_SF_Bin54_scaffold_10742_c1_2	13_Jan_SF_Bin54	d__Bacteria;p__Desulfobacterota;c__Desulfobulbia;o__Desulfobulbales;f__Desulfurivibrionaceae;g__UBA5123;s__	No
13_Jan_SF_Bin54_scaffold_13156_c1_4	13_Jan_SF_Bin54	d__Bacteria;p__Desulfobacterota;c__Desulfobulbia;o__Desulfobulbales;f__Desulfurivibrionaceae;g__UBA5123;s__	No
13_Jan_SF_Bin8_scaffold_6064_c1_4	13_Jan_SF_Bin8	d__Bacteria;p__Desulfobacterota;c__Desulfobulbia;o__Desulfobulbales;f__BM004;g__BM004;s__BM004 sp012974315	No
13_Oct_SF_Bin15_scaffold_23040_c1_2	13_Oct_SF_Bin15	d__Bacteria;p__Desulfobacterota;c__Syntrophobacteria;o__BM002;f__BM002;g__BM002;s__BM002 sp002899795	No
13_Oct_SF_Bin29_scaffold_19289_c1_2	13_Oct_SF_Bin29	d__Bacteria;p__Desulfobacterota;c__Desulfobacteria;o__Desulfobacterales;f__UBA11574;g__JAAXQD01;s__	No
13_Oct_SF_Bin32_scaffold_78_c1_4	13_Oct_SF_Bin32	d__Bacteria;p__Desulfobacterota;c__Desulfobacteria;o__Desulfobacterales;f__UBA11574;g__UBA11574;s__UBA11574 sp002868985	No
13_Oct_SF_Bin33_scaffold_27923_c1_1	13_Oct_SF_Bin33	d__Bacteria;p__Desulfobacterota;c__Desulfobulbia;o__Desulfobulbales;f__BM004;g__BM004;s__BM004 sp002868955	No
21_July_SF_Bin1_scaffold_18_c1_16	21_July_SF_Bin1	d__Bacteria;p__Desulfobacterota;c__Desulfobacteria;o__Desulfobacterales;f__UBA11574;g__UBA11574;s__UBA11574 sp002868985	No
21_May_SF_Bin30_scaffold_378_c1_13	21_May_SF_Bin30	d__Bacteria;p__Desulfobacterota;c__Desulfobulbia;o__Desulfobulbales;f__BM004;g__BM004;s__BM004 sp002868955	No
21_May_SF_Bin32_scaffold_2516_c1_3	21_May_SF_Bin32	d__Bacteria;p__Desulfobacterota;c__Desulfobacteria;o__Desulfobacterales;f__;g__;s__	No
21_May_SF_Bin9_scaffold_546_c1_12	21_May_SF_Bin9	d__Bacteria;p__Desulfobacterota;c__Desulfobacteria;o__Desulfobacterales;f__UBA11574;g__UBA11574;s__UBA11574 sp002868985	No
21_Oct_SF_Bin14_scaffold_6220_c1_3	21_Oct_SF_Bin14	d__Bacteria;p__Desulfobacterota;c__Desulfobacteria;o__Desulfobacterales;f__UBA2174_A;g__;s__	No
21_Oct_SF_Bin17_scaffold_25_c1_16	21_Oct_SF_Bin17	d__Bacteria;p__Desulfobacterota;c__Desulfobacteria;o__Desulfobacterales;f__UBA11574;g__UBA11574;s__UBA11574 sp002868985	No
21_Oct_SF_Bin18_scaffold_1371_c1_1	21_Oct_SF_Bin18	d__Bacteria;p__Desulfobacterota;c__Desulfobulbia;o__Desulfobulbales;f__BM004;g__BM004;s__BM004 sp002868955	No
21_Oct_SF_Bin24_scaffold_5235_c1_1	21_Oct_SF_Bin24	d__Bacteria;p__Desulfobacterota;c__Syntrophobacteria;o__BM002;f__BM002;g__BM002;s__BM002 sp002899795	No
24_Jan_SF_Bin10_scaffold_7947_c1_3	24_Jan_SF_Bin10	d__Bacteria;p__Desulfobacterota;c__Desulfobacteria;o__Desulfobacterales;f__SG8-13;g__;s__	No
24_Jan_SF_Bin12_scaffold_7264_c1_3	24_Jan_SF_Bin12	d__Bacteria;p__Desulfobacterota;c__Desulfobacteria;o__Desulfobacterales;f__;g__;s__	No
24_Jan_SF_Bin13_scaffold_3742_c1_5	24_Jan_SF_Bin13	d__Bacteria;p__Desulfobacterota;c__Desulfobacteria;o__Desulfobacterales;f__UBA11574;g__UBA11574;s__UBA11574 sp002868985	No
24_Jan_SF_Bin17_scaffold_13852_c1_4	24_Jan_SF_Bin17	d__Bacteria;p__Desulfobacterota;c__Syntrophobacteria;o__BM002;f__BM002;g__BM002;s__BM002 sp002899795	No
24_Jan_SF_Bin17_scaffold_1726_c1_2	24_Jan_SF_Bin17	d__Bacteria;p__Desulfobacterota;c__Syntrophobacteria;o__BM002;f__BM002;g__BM002;s__BM002 sp002899795	No
24_May_SF_Bin33_scaffold_1518_c1_7	24_May_SF_Bin33	d__Bacteria;p__Desulfobacterota;c__Desulfobacteria;o__Desulfobacterales;f__UBA11574;g__UBA11574;s__UBA11574 sp002868985	No
24_Oct_SF_Bin38_scaffold_24259_c1_1	24_Oct_SF_Bin38	d__Bacteria;p__Desulfobacterota;c__Desulfobacteria;o__Desulfobacterales;f__SURF-15;g__;s__	No
24_Oct_SF_Bin38_scaffold_29899_c1_2	24_Oct_SF_Bin38	d__Bacteria;p__Desulfobacterota;c__Desulfobacteria;o__Desulfobacterales;f__SURF-15;g__;s__	No
4_1_Jan_SF_Bin35_4_1_Jan_bin_35_scaffold_17479_c1_3	4_1_Jan_SF_Bin35	d__Bacteria;p__Gemmatimonadota;c__Gemmatimonadetes;o__Gemmatimonadales;f__GWC2-71-9;g__;s__	No
4_1_July_SF_Bin20_4_1_July_bin_20_scaffold_772_c1_17	4_1_July_SF_Bin20	d__Bacteria;p__Nitrospirota;c__UBA9217;o__UBA9217;f__UBA9217;g__;s__	No
4_1_July_SF_Bin47_4_1_July_bin_47_scaffold_1334_c1_2	4_1_July_SF_Bin47	d__Bacteria;p__Nitrospirota;c__Thermodesulfovibrionia;o__Thermodesulfovibrionales;f__UBA6898;g__GW-Nitrospira-1;s__	No
4_1_July_SF_Bin55_4_1_July_bin_55_scaffold_4128_c1_2	4_1_July_SF_Bin55	d__Bacteria;p__Desulfobacterota;c__SM23-61;o__SM23-61;f__SM23-61;g__JAHJQK01;s__	No
4_1_July_SF_Bin60_4_1_July_bin_60_scaffold_22377_c1_3	4_1_July_SF_Bin60	d__Bacteria;p__Desulfobacterota;c__Desulfobacteria;o__Desulfobacterales;f__UBA11574;g__UBA11574;s__	No
4_1_May_SF_Bin4_scaffold_5324_c1_4	4_1_May_SF_Bin4	d__Bacteria;p__Desulfobacterota;c__Desulfobulbia;o__Desulfobulbales;f__Desulfobulbaceae;g__;s__	No
4_1_May_SF_Bin57_scaffold_1892_c1_12	4_1_May_SF_Bin57	d__Bacteria;p__Desulfobacterota;c__Desulfobulbia;o__Desulfobulbales;f__Desulfurivibrionaceae;g__UBA5123;s__	No
4_1_May_SF_Bin58_scaffold_69_c1_36	4_1_May_SF_Bin58	d__Bacteria;p__Desulfobacterota;c__Desulfobulbia;o__Desulfobulbales;f__Desulfurivibrionaceae;g__UBA2262;s__UBA2262 sp013349295	No
4_1_May_SF_Bin9_scaffold_19556_c1_4	4_1_May_SF_Bin9	d__Bacteria;p__Desulfobacterota;c__Desulfobulbia;o__Desulfobulbales;f__Desulfurivibrionaceae;g__UBA5123;s__	No
4_1_Oct_SF_Bin44_scaffold_7561_c1_5	4_1_Oct_SF_Bin44	d__Bacteria;p__Gemmatimonadota;c__Gemmatimonadetes;o__Gemmatimonadales;f__GWC2-71-9;g__;s__	No
8_1_July_SF_Bin20_scaffold_1441_c1_7	8_1_July_SF_Bin20	d__Bacteria;p__Desulfobacterota;c__Desulfobulbia;o__Desulfobulbales;f__Desulfurivibrionaceae;g__DUZU01;s__DUZU01 sp013349285	No
8_1_Oct_SF_Bin79_scaffold_980_c1_11	8_1_Oct_SF_Bin79	d__Bacteria;p__Nitrospirota;c__Thermodesulfovibrionia;o__Thermodesulfovibrionales;f__SM23-35;g__VGWZ01;s__	No
13_Jan_SF_Bin10_scaffold_8429_c1_6	13_Jan_SF_Bin10	d__Bacteria;p__Proteobacteria;c__Alphaproteobacteria;o__Rhodospirillales;f__Magnetovibrionaceae;g__;s__	Yes
13_Jan_SF_Bin13_scaffold_1332_c1_12	13_Jan_SF_Bin13	d__Bacteria;p__Proteobacteria;c__Gammaproteobacteria;o__SZUA-229;f__SZUA-229;g__SZUA-116;s__	Yes
13_Jan_SF_Bin42_scaffold_749_c1_10	13_Jan_SF_Bin42	d__Bacteria;p__Proteobacteria;c__Gammaproteobacteria;o__Thiohalomonadales;f__Thiohalomonadaceae;g__;s__	Yes
13_Jan_SF_Bin58_scaffold_553_c1_12	13_Jan_SF_Bin58	d__Bacteria;p__Proteobacteria;c__Gammaproteobacteria;o__Woeseiales;f__Woeseiaceae;g__UBA1847;s__	Yes
13_Jan_SF_Bin62_scaffold_28534_c1_2	13_Jan_SF_Bin62	d__Bacteria;p__Proteobacteria;c__Gammaproteobacteria;o__Acidiferrobacterales;f__Sulfurifustaceae;g__Sulfuricaulis;s__	Yes
13_July_SF_Bin1_scaffold_3034_c1_2	13_July_SF_Bin1	d__Bacteria;p__Proteobacteria;c__Gammaproteobacteria;o__Arenicellales;f__;g__;s__	Yes
13_July_SF_Bin18_scaffold_5471_c1_2	13_July_SF_Bin18	d__Bacteria;p__Proteobacteria;c__Gammaproteobacteria;o__Woeseiales;f__Woeseiaceae;g__JAACFB01;s__	Yes
13_July_SF_Bin23_scaffold_962_c1_12	13_July_SF_Bin23_1	d__Bacteria;p__Proteobacteria;c__Gammaproteobacteria;o__Woeseiales;f__Woeseiaceae;g__UBA1847;s__	Yes
13_July_SF_Bin31_scaffold_1731_c1_11	13_July_SF_Bin31	d__Bacteria;p__Proteobacteria;c__Gammaproteobacteria;o__UBA9214;f__UBA9214;g__SZUA-186;s__	Yes
13_July_SF_Bin35_scaffold_2010_c1_8	13_July_SF_Bin35	d__Bacteria;p__Proteobacteria;c__Gammaproteobacteria;o__GCA-001735895;f__GCA-001735895;g__GCA-001735895;s__	Yes
13_July_SF_Bin40_scaffold_1534_c1_2	13_July_SF_Bin40	d__Bacteria;p__Proteobacteria;c__Gammaproteobacteria;o__GCA-001735895;f__GCA-001735895;g__GCA-001735895;s__	Yes
13_July_SF_Bin49_scaffold_777_c1_8	13_July_SF_Bin49	d__Bacteria;p__Proteobacteria;c__Gammaproteobacteria;o__Woeseiales;f__Woeseiaceae;g__JAACFB01;s__	Yes
13_July_SF_Bin52_scaffold_1132_c1_6	13_July_SF_Bin52	d__Bacteria;p__Proteobacteria;c__Gammaproteobacteria;o__Acidiferrobacterales;f__Sulfurifustaceae;g__Sulfuricaulis;s__	Yes
13_July_SF_Bin55_scaffold_25319_c1_3	13_July_SF_Bin55	d__Bacteria;p__Proteobacteria;c__Gammaproteobacteria;o__HK1;f__HK1;g__;s__	Yes
13_May_SF_Bin22_scaffold_3649_c1_2	13_May_SF_Bin22	d__Bacteria;p__Proteobacteria;c__Gammaproteobacteria;o__Woeseiales;f__Woeseiaceae;g__JAACFB01;s__	Yes
13_May_SF_Bin41_scaffold_799_c1_26	13_May_SF_Bin41	d__Bacteria;p__Proteobacteria;c__Gammaproteobacteria;o__GCA-001735895;f__GCA-001735895;g__GCA-001735895;s__	Yes
13_May_SF_Bin53_scaffold_1525_c1_3	13_May_SF_Bin53	d__Bacteria;p__Proteobacteria;c__Gammaproteobacteria;o__Woeseiales;f__Woeseiaceae;g__JAACFB01;s__	Yes
13_May_SF_Bin65_scaffold_250_c1_39	13_May_SF_Bin65	d__Bacteria;p__Proteobacteria;c__Gammaproteobacteria;o__Woeseiales;f__Woeseiaceae;g__UBA1847;s__	Yes
13_May_SF_Bin7_scaffold_626_c1_25	13_May_SF_Bin7	d__Bacteria;p__Proteobacteria;c__Gammaproteobacteria;o__Burkholderiales;f__SG8-39;g__JAABQT01;s__	Yes
13_May_SF_Bin71_scaffold_488_c1_23	13_May_SF_Bin71	d__Bacteria;p__Proteobacteria;c__Gammaproteobacteria;o__Acidiferrobacterales;f__Sulfurifustaceae;g__Sulfuricaulis;s__	Yes
13_May_SF_Bin80_scaffold_6144_c1_8	13_May_SF_Bin80	d__Bacteria;p__Proteobacteria;c__Gammaproteobacteria;o__Arenicellales;f__;g__;s__	Yes
13_May_SF_Bin88_scaffold_28511_c1_6	13_May_SF_Bin88	d__Bacteria;p__Proteobacteria;c__Gammaproteobacteria;o__Acidiferrobacterales;f__Sulfurifustaceae;g__Sulfuricaulis;s__	Yes
13_May_SF_Bin92_scaffold_28778_c1_7	13_May_SF_Bin92	d__Bacteria;p__Proteobacteria;c__Gammaproteobacteria;o__GCA-001735895;f__GCA-001735895;g__GCA-001735895;s__	Yes
13_Oct_SF_Bin20_scaffold_3855_c1_2	13_Oct_SF_Bin20	d__Bacteria;p__Proteobacteria;c__Gammaproteobacteria;o__UBA9214;f__UBA9214;g__SZUA-186;s__	Yes
13_Oct_SF_Bin7_scaffold_9302_c1_2	13_Oct_SF_Bin7	d__Bacteria;p__Proteobacteria;c__Gammaproteobacteria;o__Acidiferrobacterales;f__Sulfurifustaceae;g__Sulfuricaulis;s__	Yes
21_Jan_SF_Bin10_scaffold_2894_c1_7	21_Jan_SF_Bin10	d__Bacteria;p__Proteobacteria;c__Alphaproteobacteria;o__Kiloniellales;f__J153;g__;s__	Yes
21_Jan_SF_Bin30_scaffold_98_c1_43	21_Jan_SF_Bin30	d__Bacteria;p__Proteobacteria;c__Gammaproteobacteria;o__GCA-001735895;f__GCA-001735895;g__GCA-001735895;s__	Yes
21_Jan_SF_Bin34_scaffold_16341_c1_3	21_Jan_SF_Bin34	d__Bacteria;p__Proteobacteria;c__Gammaproteobacteria;o__UBA4575;f__UBA4575;g__JABDMD01;s__JABDMD01 sp013001685	Yes
21_Jan_SF_Bin37_scaffold_274_c1_26	21_Jan_SF_Bin37	d__Bacteria;p__Proteobacteria;c__Gammaproteobacteria;o__GCA-001735895;f__GCA-001735895;g__GCA-001735895;s__	Yes
21_Jan_SF_Bin38_scaffold_91_c1_45	21_Jan_SF_Bin38	d__Bacteria;p__Proteobacteria;c__Gammaproteobacteria;o__Woeseiales;f__Woeseiaceae;g__JAACFB01;s__	Yes
21_Jan_SF_Bin47_scaffold_14874_c1_5	21_Jan_SF_Bin47	d__Bacteria;p__Proteobacteria;c__Gammaproteobacteria;o__Acidiferrobacterales;f__SPGG2;g__SPGG2;s__	Yes
21_Jan_SF_Bin52_scaffold_44997_c1_6	21_Jan_SF_Bin52	d__Bacteria;p__Proteobacteria;c__Gammaproteobacteria;o__Arenicellales;f__;g__;s__	Yes
21_Jan_SF_Bin54_scaffold_55014_c1_2	21_Jan_SF_Bin54	d__Bacteria;p__Proteobacteria;c__Gammaproteobacteria;o__Arenicellales;f__RKSH01;g__;s__	Yes
21_Jan_SF_Bin69_scaffold_838_c1_25	21_Jan_SF_Bin69	d__Bacteria;p__Proteobacteria;c__Gammaproteobacteria;o__GCA-001735895;f__GCA-001735895;g__GCA-001735895;s__	Yes
21_July_SF_Bin13_scaffold_595_c1_8	21_July_SF_Bin13	d__Bacteria;p__Proteobacteria;c__Gammaproteobacteria;o__Woeseiales;f__Woeseiaceae;g__JAACFB01;s__	Yes
21_May_SF_Bin21_scaffold_8065_c1_7	21_May_SF_Bin21	d__Bacteria;p__Proteobacteria;c__Gammaproteobacteria;o__Woeseiales;f__Woeseiaceae;g__JAACFB01;s__	Yes
21_May_SF_Bin27_scaffold_19310_c1_6	21_May_SF_Bin27	d__Bacteria;p__Proteobacteria;c__Gammaproteobacteria;o__UBA9214;f__UBA9214;g__UBA9214;s__	Yes
21_May_SF_Bin33_scaffold_1985_c1_8	21_May_SF_Bin33	d__Bacteria;p__Proteobacteria;c__Alphaproteobacteria;o__Kiloniellales;f__J153;g__;s__	Yes
21_Oct_SF_Bin2_scaffold_18614_c1_1	21_Oct_SF_Bin2	d__Bacteria;p__Proteobacteria;c__Gammaproteobacteria;o__UBA9214;f__UBA9214;g__SZUA-186;s__	Yes
21_Oct_SF_Bin23_scaffold_5227_c1_3	21_Oct_SF_Bin23	d__Bacteria;p__Proteobacteria;c__Gammaproteobacteria;o__GCA-001735895;f__GCA-001735895;g__GCA-001735895;s__	Yes
24_Jan_SF_Bin10_scaffold_8929_c1_3	24_Jan_SF_Bin10	d__Bacteria;p__Desulfobacterota;c__Desulfobacteria;o__Desulfobacterales;f__SG8-13;g__;s__	Yes
24_Jan_SF_Bin23_scaffold_915_c1_6	24_Jan_SF_Bin23	d__Bacteria;p__Proteobacteria;c__Alphaproteobacteria;o__Kiloniellales;f__J153;g__;s__	Yes
24_Jan_SF_Bin6_scaffold_963_c1_9	24_Jan_SF_Bin6	d__Bacteria;p__Proteobacteria;c__Gammaproteobacteria;o__UBA9214;f__UBA9214;g__UBA9214;s__	Yes
24_July_SF_Bin11_scaffold_3088_c1_7	24_July_SF_Bin11	d__Bacteria;p__Proteobacteria;c__Gammaproteobacteria;o__Xanthomonadales;f__SZUA-36;g__SZUA-36;s__	Yes
24_July_SF_Bin17_scaffold_4899_c1_1	24_July_SF_Bin17	d__Bacteria;p__Proteobacteria;c__Alphaproteobacteria;o__Kiloniellales;f__J153;g__;s__	Yes
24_July_SF_Bin20_scaffold_15593_c1_2	24_July_SF_Bin20	d__Bacteria;p__Proteobacteria;c__Gammaproteobacteria;o__UBA9214;f__UBA9214;g__UBA9214;s__	Yes
24_May_SF_Bin18_scaffold_44_c1_11	24_May_SF_Bin18	d__Bacteria;p__Proteobacteria;c__Gammaproteobacteria;o__UBA9214;f__UBA9214;g__UBA9214;s__	Yes
24_May_SF_Bin29_scaffold_22110_c1_2	24_May_SF_Bin29	d__Bacteria;p__Proteobacteria;c__Gammaproteobacteria;o__UBA6429;f__UBA6429;g__;s__	Yes
24_Oct_SF_Bin19_scaffold_224_c1_9	24_Oct_SF_Bin19	d__Bacteria;p__Proteobacteria;c__Alphaproteobacteria;o__Kiloniellales;f__J153;g__;s__	Yes
24_Oct_SF_Bin23_scaffold_24137_c1_1	24_Oct_SF_Bin23	d__Bacteria;p__Proteobacteria;c__Gammaproteobacteria;o__Pseudomonadales;f__Halieaceae;g__Halioglobus;s__	Yes
24_Oct_SF_Bin33_scaffold_13729_c1_1	24_Oct_SF_Bin33	d__Bacteria;p__Proteobacteria;c__Gammaproteobacteria;o__UBA9214;f__UBA9214;g__UBA9214;s__	Yes
24_Oct_SF_Bin7_scaffold_662_c1_8	24_Oct_SF_Bin7	d__Bacteria;p__Proteobacteria;c__Gammaproteobacteria;o__Xanthomonadales;f__SZUA-36;g__SZUA-36;s__	Yes
4_1_Jan_SF_Bin33_4_1_Jan_bin_33_scaffold_25232_c1_4	4_1_Jan_SF_Bin33	d__Bacteria;p__Proteobacteria;c__Gammaproteobacteria;o__Burkholderiales;f__Burkholderiaceae;g__CADEEN01;s__	Yes
4_1_Jan_SF_Bin33_4_1_Jan_bin_33_scaffold_8015_c1_2	4_1_Jan_SF_Bin33	d__Bacteria;p__Proteobacteria;c__Gammaproteobacteria;o__Burkholderiales;f__Burkholderiaceae;g__CADEEN01;s__	Yes
4_1_Jan_SF_Bin54_4_1_Jan_bin_54_scaffold_10266_c1_7	4_1_Jan_SF_Bin54	d__Bacteria;p__Proteobacteria;c__Gammaproteobacteria;o__Burkholderiales;f__SG8-39;g__JAABQT01;s__	Yes
4_1_Jan_SF_Bin64_4_1_Jan_bin_64_scaffold_14755_c1_1	4_1_Jan_SF_Bin64	d__Bacteria;p__Proteobacteria;c__Gammaproteobacteria;o__Burkholderiales;f__Burkholderiaceae;g__;s__	Yes
4_1_Jan_SF_Bin64_4_1_Jan_bin_64_scaffold_8880_c1_1	4_1_Jan_SF_Bin64	d__Bacteria;p__Proteobacteria;c__Gammaproteobacteria;o__Burkholderiales;f__Burkholderiaceae;g__;s__	Yes
4_1_July_SF_Bin12_4_1_July_bin_12_scaffold_10842_c1_1	4_1_July_SF_Bin12	d__Bacteria;p__Proteobacteria;c__Gammaproteobacteria;o__Acidiferrobacterales;f__UBA6901;g__UBA6901;s__	Yes
4_1_July_SF_Bin12_4_1_July_bin_12_scaffold_10941_c1_1	4_1_July_SF_Bin12	d__Bacteria;p__Proteobacteria;c__Gammaproteobacteria;o__Acidiferrobacterales;f__UBA6901;g__UBA6901;s__	Yes
4_1_July_SF_Bin25_scaffold_2668_c1_8	4_1_July_SF_Bin25	d__Bacteria;p__Spirochaetota;c__UBA6919;o__UBA6919;f__UBA6919;g__;s__	Yes
4_1_July_SF_Bin28_scaffold_10959_c1_6	4_1_July_SF_Bin28	d__Bacteria;p__Proteobacteria;c__Gammaproteobacteria;o__Burkholderiales;f__SG8-39;g__SG8-39;s__	Yes
4_1_July_SF_Bin31_4_1_July_bin_31_scaffold_25971_c1_3	4_1_July_SF_Bin31	d__Bacteria;p__Spirochaetota;c__Leptospirae;o__Turneriellales;f__;g__;s__	Yes
4_1_July_SF_Bin31_4_1_July_bin_31_scaffold_2659_c1_11	4_1_July_SF_Bin31	d__Bacteria;p__Spirochaetota;c__Leptospirae;o__Turneriellales;f__;g__;s__	Yes
4_1_July_SF_Bin48_scaffold_5068_c1_3	4_1_July_SF_Bin48	d__Bacteria;p__SAR324;c__SAR324;o__SAR324;f__;g__;s__	Yes
4_1_July_SF_Bin56_4_1_July_bin_56_scaffold_222_c1_3	4_1_July_SF_Bin56	d__Bacteria;p__Spirochaetota;c__Leptospirae;o__Turneriellales;f__;g__;s__	Yes
4_1_July_SF_Bin6_4_1_July_bin_6_scaffold_16863_c1_1	4_1_July_SF_Bin6	d__Bacteria;p__Proteobacteria;c__Gammaproteobacteria;o__Burkholderiales;f__Gallionellaceae;g__Gallionella;s__	Yes
4_1_July_SF_Bin6_4_1_July_bin_6_scaffold_25771_c1_4	4_1_July_SF_Bin6	d__Bacteria;p__Proteobacteria;c__Gammaproteobacteria;o__Burkholderiales;f__Gallionellaceae;g__Gallionella;s__	Yes
4_1_July_SF_Bin9_4_1_July_bin_9_scaffold_3345_c1_7	4_1_July_SF_Bin9	d__Bacteria;p__Proteobacteria;c__Gammaproteobacteria;o__S140-43;f__S140-43;g__;s__	Yes
4_1_May_SF_Bin13_scaffold_11656_c1_1	4_1_May_SF_Bin13	d__Bacteria;p__Proteobacteria;c__Gammaproteobacteria;o__Burkholderiales;f__Gallionellaceae;g__Gallionella;s__	Yes
4_1_May_SF_Bin26_scaffold_9346_c1_3	4_1_May_SF_Bin26	d__Bacteria;p__Proteobacteria;c__Gammaproteobacteria;o__Burkholderiales;f__Gallionellaceae;g__VIKH01;s__	Yes
4_1_May_SF_Bin30_scaffold_1429_c1_7	4_1_May_SF_Bin30	d__Bacteria;p__Proteobacteria;c__Gammaproteobacteria;o__Burkholderiales;f__Burkholderiaceae;g__CADEEN01;s__	Yes
4_1_May_SF_Bin30_scaffold_24219_c1_5	4_1_May_SF_Bin30	d__Bacteria;p__Proteobacteria;c__Gammaproteobacteria;o__Burkholderiales;f__Burkholderiaceae;g__CADEEN01;s__	Yes
4_1_May_SF_Bin49_scaffold_6425_c2_1	4_1_May_SF_Bin49	d__Bacteria;p__Proteobacteria;c__Gammaproteobacteria;o__Burkholderiales;f__SG8-39;g__JAABQT01;s__	Yes
4_1_Oct_SF_Bin16_scaffold_303_c1_28	4_1_Oct_SF_Bin16	d__Bacteria;p__Proteobacteria;c__Gammaproteobacteria;o__Burkholderiales;f__Casimicrobiaceae;g__VBCG01;s__	Yes
4_1_Oct_SF_Bin28_scaffold_1918_c1_11	4_1_Oct_SF_Bin28	d__Bacteria;p__Proteobacteria;c__Gammaproteobacteria;o__Burkholderiales;f__Burkholderiaceae;g__CADEEN01;s__	Yes
4_1_Oct_SF_Bin31_scaffold_17725_c2_5	4_1_Oct_SF_Bin31	d__Bacteria;p__Proteobacteria;c__Gammaproteobacteria;o__Burkholderiales;f__Burkholderiaceae;g__Rubrivivax;s__	Yes
4_1_Oct_SF_Bin40_scaffold_25377_c1_2	4_1_Oct_SF_Bin40	d__Bacteria;p__Proteobacteria;c__Gammaproteobacteria;o__Burkholderiales;f__Usitatibacteraceae;g__FEB-7;s__	Yes
4_1_Oct_SF_Bin51_scaffold_2772_c1_9	4_1_Oct_SF_Bin51	d__Bacteria;p__Proteobacteria;c__Gammaproteobacteria;o__Burkholderiales;f__Burkholderiaceae;g__;s__	Yes
4_1_Oct_SF_Bin8_scaffold_30572_c1_5	4_1_Oct_SF_Bin8	d__Bacteria;p__Proteobacteria;c__Gammaproteobacteria;o__Burkholderiales;f__SG8-39;g__JAABQT01;s__	Yes
4_1_Oct_SF_Bin8_scaffold_9988_c2_1	4_1_Oct_SF_Bin8	d__Bacteria;p__Proteobacteria;c__Gammaproteobacteria;o__Burkholderiales;f__SG8-39;g__JAABQT01;s__	Yes
8_1_Jan_SF_Bin100_scaffold_16089_c1_7	8_1_Jan_SF_Bin100	d__Bacteria;p__Proteobacteria;c__Gammaproteobacteria;o__S140-43;f__S140-43;g__;s__	Yes
8_1_Jan_SF_Bin103_scaffold_1429_c1_13	8_1_Jan_SF_Bin103	d__Bacteria;p__Proteobacteria;c__Gammaproteobacteria;o__S140-43;f__S140-43;g__;s__	Yes
8_1_Jan_SF_Bin105_scaffold_2079_c1_2	8_1_Jan_SF_Bin105	d__Bacteria;p__Proteobacteria;c__Gammaproteobacteria;o__UBA6429;f__UBA6429;g__;s__	Yes
8_1_Jan_SF_Bin107_scaffold_23656_c1_7	8_1_Jan_SF_Bin107	d__Bacteria;p__Proteobacteria;c__Gammaproteobacteria;o__Burkholderiales;f__Burkholderiaceae;g__Hylemonella;s__	Yes
8_1_Jan_SF_Bin107_scaffold_6754_c1_8	8_1_Jan_SF_Bin107	d__Bacteria;p__Proteobacteria;c__Gammaproteobacteria;o__Burkholderiales;f__Burkholderiaceae;g__Hylemonella;s__	Yes
8_1_Jan_SF_Bin18_scaffold_2076_c1_3	8_1_Jan_SF_Bin18	d__Bacteria;p__Proteobacteria;c__Alphaproteobacteria;o__Rhodospirillales;f__Magnetovibrionaceae;g__;s__	Yes
8_1_Jan_SF_Bin19_scaffold_98_c1_45	8_1_Jan_SF_Bin19	d__Bacteria;p__Proteobacteria;c__Gammaproteobacteria;o__AKS1;f__AKS1;g__;s__	Yes
8_1_Jan_SF_Bin23_scaffold_18_c1_89	8_1_Jan_SF_Bin23	d__Bacteria;p__Proteobacteria;c__Gammaproteobacteria;o__SZUA-152;f__SZUA-152;g__;s__	Yes
8_1_Jan_SF_Bin27_scaffold_6094_c1_2	8_1_Jan_SF_Bin27	d__Bacteria;p__Proteobacteria;c__Gammaproteobacteria;o__GCA-001735895;f__GCA-001735895;g__GCA-001735895;s__	Yes
8_1_Jan_SF_Bin39_scaffold_11473_c1_3	8_1_Jan_SF_Bin39	d__Bacteria;p__Proteobacteria;c__Gammaproteobacteria;o__UBA6429;f__UBA6429;g__;s__	Yes
8_1_Jan_SF_Bin44_scaffold_25906_c1_6	8_1_Jan_SF_Bin44	d__Bacteria;p__Proteobacteria;c__Gammaproteobacteria;o__UBA6429;f__UBA6429;g__;s__	Yes
8_1_Jan_SF_Bin44_scaffold_32549_c1_1	8_1_Jan_SF_Bin44	d__Bacteria;p__Proteobacteria;c__Gammaproteobacteria;o__UBA6429;f__UBA6429;g__;s__	Yes
8_1_Jan_SF_Bin53_scaffold_2132_c1_5	8_1_Jan_SF_Bin53	d__Bacteria;p__Proteobacteria;c__Gammaproteobacteria;o__UBA9214;f__UBA9214;g__UBA9214;s__	Yes
8_1_Jan_SF_Bin54_scaffold_53_c1_100	8_1_Jan_SF_Bin54	d__Bacteria;p__Proteobacteria;c__Gammaproteobacteria;o__SZUA-229;f__SZUA-229;g__;s__	Yes
8_1_Jan_SF_Bin56_scaffold_47_c1_37	8_1_Jan_SF_Bin56	d__Bacteria;p__Proteobacteria;c__Gammaproteobacteria;o__SZUA-229;f__SZUA-229;g__SZUA-116;s__	Yes
8_1_Jan_SF_Bin60_scaffold_32391_c1_1	8_1_Jan_SF_Bin60	d__Bacteria;p__Proteobacteria;c__Alphaproteobacteria;o__UBA8366;f__JADFVY01;g__JADFVY01;s__	Yes
8_1_Jan_SF_Bin60_scaffold_79325_c1_1	8_1_Jan_SF_Bin60	d__Bacteria;p__Proteobacteria;c__Alphaproteobacteria;o__UBA8366;f__JADFVY01;g__JADFVY01;s__	Yes
8_1_Jan_SF_Bin63_scaffold_14389_c1_3	8_1_Jan_SF_Bin63	d__Bacteria;p__Proteobacteria;c__Gammaproteobacteria;o__UBA6429;f__UBA6429;g__;s__	Yes
8_1_Jan_SF_Bin65_scaffold_188_c1_11	8_1_Jan_SF_Bin65	d__Bacteria;p__Proteobacteria;c__Gammaproteobacteria;o__SZUA-229;f__SZUA-229;g__;s__	Yes
8_1_Jan_SF_Bin75_scaffold_28381_c1_2	8_1_Jan_SF_Bin75	d__Bacteria;p__Proteobacteria;c__Gammaproteobacteria;o__AKS1;f__AKS1;g__;s__	Yes
8_1_Jan_SF_Bin82_scaffold_15_c1_56	8_1_Jan_SF_Bin82	d__Bacteria;p__Proteobacteria;c__Gammaproteobacteria;o__UBA6429;f__UBA6429;g__;s__	Yes
8_1_Jan_SF_Bin9_scaffold_13284_c1_2	8_1_Jan_SF_Bin9	d__Bacteria;p__Nitrospinota;c__UBA7883;o__UBA7883;f__UBA7883;g__;s__	Yes
8_1_Jan_SF_Bin95_scaffold_3356_c1_7	8_1_Jan_SF_Bin95	d__Bacteria;p__Proteobacteria;c__Alphaproteobacteria;o__Rhodospirillales;f__Magnetovibrionaceae;g__;s__	Yes
8_1_Jan_SF_Bin98_scaffold_3_c1_177	8_1_Jan_SF_Bin98	d__Bacteria;p__Proteobacteria;c__Gammaproteobacteria;o__SZUA-229;f__SZUA-229;g__;s__	Yes
8_1_July_SF_Bin11_scaffold_5314_c1_3	8_1_July_SF_Bin11	d__Bacteria;p__Proteobacteria;c__Gammaproteobacteria;o__UBA9214;f__UBA9214;g__UBA9214;s__	Yes
8_1_July_SF_Bin13_scaffold_14832_c1_2	8_1_July_SF_Bin13	d__Bacteria;p__Proteobacteria;c__Gammaproteobacteria;o__Acidiferrobacterales;f__Sulfurifustaceae;g__Sulfuricaulis;s__	Yes
8_1_July_SF_Bin13_scaffold_16842_c1_3	8_1_July_SF_Bin13	d__Bacteria;p__Proteobacteria;c__Gammaproteobacteria;o__Acidiferrobacterales;f__Sulfurifustaceae;g__Sulfuricaulis;s__	Yes
8_1_July_SF_Bin24_scaffold_46192_c1_5	8_1_July_SF_Bin24	d__Bacteria;p__Proteobacteria;c__Gammaproteobacteria;o__Burkholderiales;f__Burkholderiaceae;g__LMDS01;s__	Yes
8_1_July_SF_Bin26_scaffold_1830_c1_15	8_1_July_SF_Bin26	d__Bacteria;p__SAR324;c__SAR324;o__XYD2-FULL-50-16;f__XYD2-FULL-50-16;g__;s__	Yes
8_1_July_SF_Bin3_scaffold_2563_c1_13	8_1_July_SF_Bin3	d__Bacteria;p__Proteobacteria;c__Alphaproteobacteria;o__UBA8366;f__JADFVY01;g__JADFVY01;s__	Yes
8_1_July_SF_Bin34_scaffold_19_c1_46	8_1_July_SF_Bin34	d__Bacteria;p__Nitrospinota;c__UBA7883;o__JACRGQ01;f__;g__;s__	Yes
8_1_July_SF_Bin39_scaffold_3796_c1_3	8_1_July_SF_Bin39	d__Bacteria;p__Proteobacteria;c__Gammaproteobacteria;o__Acidiferrobacterales;f__Sulfurifustaceae;g__Sulfuricaulis;s__	Yes
8_1_July_SF_Bin40_scaffold_4378_c1_1	8_1_July_SF_Bin40	d__Bacteria;p__Proteobacteria;c__Gammaproteobacteria;o__SZUA-229;f__SZUA-229;g__;s__	Yes
8_1_July_SF_Bin48_scaffold_318_c1_15	8_1_July_SF_Bin48	d__Bacteria;p__Nitrospinota;c__UBA7883;o__UBA7883;f__UBA7883;g__;s__	Yes
8_1_July_SF_Bin54_scaffold_266_c1_11	8_1_July_SF_Bin54	d__Bacteria;p__Proteobacteria;c__Gammaproteobacteria;o__SZUA-229;f__SZUA-229;g__;s__	Yes
8_1_July_SF_Bin55_scaffold_17_c1_100	8_1_July_SF_Bin55	d__Bacteria;p__Proteobacteria;c__Gammaproteobacteria;o__S140-43;f__S140-43;g__;s__	Yes
8_1_July_SF_Bin57_scaffold_3010_c1_10	8_1_July_SF_Bin57	d__Bacteria;p__Proteobacteria;c__Gammaproteobacteria;o__UBA6429;f__UBA6429;g__;s__	Yes
8_1_July_SF_Bin62_scaffold_3535_c1_2	8_1_July_SF_Bin62	d__Bacteria;p__Proteobacteria;c__Gammaproteobacteria;o__Burkholderiales;f__SG8-39;g__JAABQT01;s__	Yes
8_1_July_SF_Bin66_scaffold_306_c1_33	8_1_July_SF_Bin66	d__Bacteria;p__Proteobacteria;c__Gammaproteobacteria;o__SZUA-229;f__SZUA-229;g__SZUA-116;s__	Yes
8_1_May_SF_Bin11_scaffold_21281_c1_5	8_1_May_SF_Bin11	d__Bacteria;p__Nitrospinota;c__UBA7883;o__UBA7883;f__UBA7883;g__;s__	Yes
8_1_May_SF_Bin12_scaffold_8_c2_97	8_1_May_SF_Bin12	d__Bacteria;p__Proteobacteria;c__Gammaproteobacteria;o__UBA6429;f__UBA6429;g__;s__	Yes
8_1_May_SF_Bin17_scaffold_17036_c1_5	8_1_May_SF_Bin17	d__Bacteria;p__Nitrospinota;c__UBA7883;o__UBA7883;f__UBA7883;g__;s__	Yes
8_1_May_SF_Bin19_scaffold_33_c1_20	8_1_May_SF_Bin19	d__Bacteria;p__Proteobacteria;c__Gammaproteobacteria;o__Acidiferrobacterales;f__SZUA-150;g__;s__	Yes
8_1_Oct_SF_Bin1_scaffold_20461_c2_1	8_1_Oct_SF_Bin1	d__Bacteria;p__Spirochaetota;c__Leptospirae;o__Leptospirales;f__Leptonemataceae;g__;s__	Yes
8_1_Oct_SF_Bin102_scaffold_12_c1_28	8_1_Oct_SF_Bin102	d__Bacteria;p__Proteobacteria;c__Gammaproteobacteria;o__Acidiferrobacterales;f__SZUA-150;g__;s__	Yes
8_1_Oct_SF_Bin104_scaffold_40340_c1_7	8_1_Oct_SF_Bin104	d__Bacteria;p__Proteobacteria;c__Gammaproteobacteria;o__AKS1;f__AKS1;g__;s__	Yes
8_1_Oct_SF_Bin111_scaffold_67223_c1_1	8_1_Oct_SF_Bin111	d__Bacteria;p__Proteobacteria;c__Gammaproteobacteria;o__UBA6429;f__UBA6429;g__;s__	Yes
8_1_Oct_SF_Bin18_scaffold_55076_c1_1	8_1_Oct_SF_Bin18	d__Bacteria;p__Proteobacteria;c__Gammaproteobacteria;o__UBA6429;f__UBA6429;g__;s__	Yes
8_1_Oct_SF_Bin28_scaffold_8666_c1_10	8_1_Oct_SF_Bin28	d__Bacteria;p__Proteobacteria;c__Gammaproteobacteria;o__SZUA-229;f__SZUA-229;g__;s__	Yes
8_1_Oct_SF_Bin3_scaffold_11267_c1_4	8_1_Oct_SF_Bin3	d__Bacteria;p__Proteobacteria;c__Gammaproteobacteria;o__S140-43;f__S140-43;g__;s__	Yes
8_1_Oct_SF_Bin34_scaffold_643_c2_3	8_1_Oct_SF_Bin34	d__Bacteria;p__Proteobacteria;c__Gammaproteobacteria;o__SZUA-229;f__SZUA-229;g__SZUA-116;s__	Yes
8_1_Oct_SF_Bin56_scaffold_7644_c1_8	8_1_Oct_SF_Bin56	d__Bacteria;p__Proteobacteria;c__Gammaproteobacteria;o__Burkholderiales;f__Burkholderiaceae;g__Hylemonella;s__	Yes
8_1_Oct_SF_Bin59_scaffold_10970_c1_2	8_1_Oct_SF_Bin59	d__Bacteria;p__Nitrospinota;c__UBA7883;o__UBA7883;f__UBA7883;g__;s__	Yes
8_1_Oct_SF_Bin68_scaffold_65700_c1_2	8_1_Oct_SF_Bin68	d__Bacteria;p__Proteobacteria;c__Alphaproteobacteria;o__Rhodospirillales;f__2-02-FULL-58-16;g__;s__	Yes
8_1_Oct_SF_Bin68_scaffold_77612_c1_2	8_1_Oct_SF_Bin68	d__Bacteria;p__Proteobacteria;c__Alphaproteobacteria;o__Rhodospirillales;f__2-02-FULL-58-16;g__;s__	Yes
8_1_Oct_SF_Bin72_scaffold_5590_c1_7	8_1_Oct_SF_Bin72	d__Bacteria;p__SAR324;c__SAR324;o__SAR324;f__;g__;s__	Yes
8_1_Oct_SF_Bin77_scaffold_18275_c1_7	8_1_Oct_SF_Bin77	d__Bacteria;p__Proteobacteria;c__Gammaproteobacteria;o__UBA6429;f__UBA6429;g__;s__	Yes
8_1_Oct_SF_Bin92_scaffold_37482_c1_3	8_1_Oct_SF_Bin92	d__Bacteria;p__Proteobacteria;c__Alphaproteobacteria;o__Rhodobacterales;f__Rhodobacteraceae;g__S012-89;s__	Yes
8_1_Oct_SF_Bin95_scaffold_26402_c1_6	8_1_Oct_SF_Bin95	d__Bacteria;p__Proteobacteria;c__Gammaproteobacteria;o__Thiohalomonadales;f__Thiohalomonadaceae;g__;s__	Yes
8_1_Oct_SF_Bin98_scaffold_148_c1_9	8_1_Oct_SF_Bin98	d__Bacteria;p__Proteobacteria;c__Gammaproteobacteria;o__SZUA-152;f__SZUA-152;g__;s__	Yes

## Sheet: NarG
NarG	MAG	GTDBtk
13_Jan_SF_Bin1_scaffold_14026_c1_2-1942_1	13_Jan_SF_Bin1	d__Bacteria;p__Desulfobacterota;c__Desulfuromonadia;o__Desulfuromonadales;f__BM103;g__M0040;s__
13_Jan_SF_Bin42_scaffold_1248_c1_1-2463_1	13_Jan_SF_Bin42	d__Bacteria;p__Proteobacteria;c__Gammaproteobacteria;o__Thiohalomonadales;f__Thiohalomonadaceae;g__;s__
13_July_SF_Bin11_scaffold_1080_c1_7371-11108_1	13_July_SF_Bin11	d__Bacteria;p__Proteobacteria;c__Gammaproteobacteria;o__UBA6522;f__UBA6522;g__;s__
13_July_SF_Bin26_scaffold_14236_c1_1-1926_1	13_July_SF_Bin26	d__Bacteria;p__Acidobacteriota;c__Blastocatellia;o__Pyrinomonadales;f__Pyrinomonadaceae;g__QQUY01;s__
13_July_SF_Bin36_scaffold_1791_c1_9755-13336_1	13_July_SF_Bin36	d__Bacteria;p__Proteobacteria;c__Gammaproteobacteria;o__Burkholderiales;f__Burkholderiaceae;g__CAIKUF01;s__
13_July_SF_Bin43_scaffold_2975_c1_2356-5970_1	13_July_SF_Bin43	d__Bacteria;p__Actinobacteriota;c__Acidimicrobiia;o__UBA5794;f__UBA4744;g__UBA4744;s__
13_July_SF_Bin6_scaffold_26165_c1_1-2649_1	13_July_SF_Bin6	d__Bacteria;p__Proteobacteria;c__Alphaproteobacteria;o__Rhizobiales;f__Afifellaceae;g__;s__
13_May_SF_Bin24_scaffold_24692_c1_2-3451_1	13_May_SF_Bin24	d__Bacteria;p__Actinobacteriota;c__Acidimicrobiia;o__UBA5794;f__JAENVV01;g__JAENVV01;s__
13_May_SF_Bin27_scaffold_293_c1_8269-11883_1	13_May_SF_Bin27	d__Bacteria;p__Actinobacteriota;c__Acidimicrobiia;o__UBA5794;f__UBA4744;g__UBA4744;s__
13_May_SF_Bin34_scaffold_27298_c1_2589-3713_1	13_May_SF_Bin34	d__Bacteria;p__Proteobacteria;c__Alphaproteobacteria;o__SMXQ01;f__SMXQ01;g__SMXQ01;s__
13_May_SF_Bin38_scaffold_27321_c1_2595-3710_1	13_May_SF_Bin38	d__Bacteria;p__Proteobacteria;c__Gammaproteobacteria;o__Burkholderiales;f__Burkholderiaceae;g__CAIKUF01;s__
13_May_SF_Bin40_scaffold_6788_c1_2-2230_1	13_May_SF_Bin40	d__Bacteria;p__Proteobacteria;c__Alphaproteobacteria;o__Bin65;f__;g__;s__
13_May_SF_Bin46_scaffold_5699_c1_5674-9291_1	13_May_SF_Bin46	d__Bacteria;p__Actinobacteriota;c__Acidimicrobiia;o__UBA5794;f__ZC4RG35;g__;s__
13_May_SF_Bin57_scaffold_5020_c1_6930-10574_1	13_May_SF_Bin57	d__Bacteria;p__Actinobacteriota;c__Acidimicrobiia;o__Acidimicrobiales;f__SZUA-35;g__CADEDH01;s__
13_May_SF_Bin59_scaffold_58394_c1_726-2273_1	13_May_SF_Bin59	d__Bacteria;p__Actinobacteriota;c__Acidimicrobiia;o__UBA5794;f__JAENVV01;g__;s__
13_May_SF_Bin62_scaffold_58349_c1_107-2272_1	13_May_SF_Bin62	d__Bacteria;p__Actinobacteriota;c__Acidimicrobiia;o__Acidimicrobiales;f__SZUA-35;g__CADEDH01;s__
13_May_SF_Bin62_scaffold_61287_c1_1276-2199_1	13_May_SF_Bin62	d__Bacteria;p__Actinobacteriota;c__Acidimicrobiia;o__Acidimicrobiales;f__SZUA-35;g__CADEDH01;s__
13_May_SF_Bin84_scaffold_3202_c1_6886-10623_1	13_May_SF_Bin84	d__Bacteria;p__Proteobacteria;c__Gammaproteobacteria;o__UBA6522;f__UBA6522;g__;s__
13_Oct_SF_Bin15_scaffold_204_c1_11502-15185_1	13_Oct_SF_Bin15	d__Bacteria;p__Desulfobacterota;c__Syntrophobacteria;o__BM002;f__BM002;g__BM002;s__BM002 sp002899795
13_Oct_SF_Bin32_scaffold_775_c1_5449-8454_1	13_Oct_SF_Bin32	d__Bacteria;p__Desulfobacterota;c__Desulfobacteria;o__Desulfobacterales;f__UBA11574;g__UBA11574;s__UBA11574 sp002868985
21_Jan_SF_Bin35_scaffold_20053_c1_1-2457_1	21_Jan_SF_Bin35	d__Bacteria;p__Actinobacteriota;c__Acidimicrobiia;o__UBA5794;f__SHLN01;g__;s__
21_Jan_SF_Bin35_scaffold_24231_c1_3162-4304_1	21_Jan_SF_Bin35	d__Bacteria;p__Actinobacteriota;c__Acidimicrobiia;o__UBA5794;f__SHLN01;g__;s__
21_Jan_SF_Bin4_scaffold_13515_c1_4255-6012_1	21_Jan_SF_Bin4	d__Bacteria;p__Bacteroidota;c__Bacteroidia;o__Chitinophagales;f__Saprospiraceae;g__;s__
21_Jan_SF_Bin4_scaffold_27016_c1_2344-4053_1	21_Jan_SF_Bin4	d__Bacteria;p__Bacteroidota;c__Bacteroidia;o__Chitinophagales;f__Saprospiraceae;g__;s__
21_Jan_SF_Bin55_scaffold_2006_c1_3266-7012_1	21_Jan_SF_Bin55	d__Bacteria;p__Proteobacteria;c__Alphaproteobacteria;o__UBA8366;f__UBA8366;g__WHUA01;s__
21_Jan_SF_Bin60_scaffold_60868_c1_1270-2568_1	21_Jan_SF_Bin60	d__Bacteria;p__Proteobacteria;c__Alphaproteobacteria;o__UBA6615;f__UBA6615;g__JABDJY01;s__
21_Jan_SF_Bin71_scaffold_9759_c1_2-3208_1	21_Jan_SF_Bin71	d__Bacteria;p__Planctomycetota;c__Planctomycetia;o__Pirellulales;f__UBA7805;g__CS4-C045;s__
21_Jan_SF_Bin8_scaffold_4117_c1_2901-6509_1	21_Jan_SF_Bin8	d__Bacteria;p__Actinobacteriota;c__Acidimicrobiia;o__UBA5794;f__;g__;s__
21_July_SF_Bin16_scaffold_446_c1_267-3950_1	21_July_SF_Bin16	d__Bacteria;p__Desulfobacterota;c__Syntrophobacteria;o__BM002;f__BM002;g__BM002;s__BM002 sp002899795
21_May_SF_Bin20_scaffold_556_c1_7416-11099_1	21_May_SF_Bin20	d__Bacteria;p__Desulfobacterota;c__Syntrophobacteria;o__BM002;f__BM002;g__BM002;s__BM002 sp002899795
21_May_SF_Bin9_scaffold_3324_c1_3-3371_1	21_May_SF_Bin9	d__Bacteria;p__Desulfobacterota;c__Desulfobacteria;o__Desulfobacterales;f__UBA11574;g__UBA11574;s__UBA11574 sp002868985
21_Oct_SF_Bin24_scaffold_245_c1_9709-13392_1	21_Oct_SF_Bin24	d__Bacteria;p__Desulfobacterota;c__Syntrophobacteria;o__BM002;f__BM002;g__BM002;s__BM002 sp002899795
24_Jan_SF_Bin17_scaffold_112_c1_13910-17593_1	24_Jan_SF_Bin17	d__Bacteria;p__Desulfobacterota;c__Syntrophobacteria;o__BM002;f__BM002;g__BM002;s__BM002 sp002899795
24_Jan_SF_Bin5_scaffold_1_c1_48009-51656_1	24_Jan_SF_Bin5	d__Bacteria;p__Zixibacteria;c__MSB-5A5;o__GN15;f__FEB-12;g__;s__
24_July_SF_Bin12_scaffold_5463_c1_336-3527_1	24_July_SF_Bin12	d__Bacteria;p__Desulfobacterota;c__Syntrophobacteria;o__BM002;f__BM002;g__BM002;s__BM002 sp002899795
24_July_SF_Bin5_scaffold_208_c1_4275-7922_1	24_July_SF_Bin5	d__Bacteria;p__Zixibacteria;c__MSB-5A5;o__GN15;f__FEB-12;g__;s__
24_May_SF_Bin1_scaffold_1325_c1_5981-7105_1	24_May_SF_Bin1	d__Bacteria;p__Proteobacteria;c__Gammaproteobacteria;o__Xanthomonadales;f__SZUA-36;g__JABDPF01;s__
24_May_SF_Bin10_scaffold_35_c1_22666-26415_1	24_May_SF_Bin10	d__Bacteria;p__Desulfobacterota;c__JADFVX01;o__JADFVX01;f__;g__;s__
24_May_SF_Bin32_scaffold_2221_c1_3-3377_1	24_May_SF_Bin32	d__Bacteria;p__Desulfobacterota;c__Syntrophobacteria;o__BM002;f__BM002;g__BM002;s__BM002 sp002899795
24_Oct_SF_Bin1_scaffold_520_c1_9741-13424_1	24_Oct_SF_Bin1	d__Bacteria;p__Desulfobacterota;c__Syntrophobacteria;o__BM002;f__BM002;g__BM002;s__BM002 sp002899795
24_Oct_SF_Bin20_scaffold_18102_c1_1320-2729_1	24_Oct_SF_Bin20	d__Bacteria;p__Desulfobacterota;c__Desulfuromonadia;o__Desulfuromonadales;f__BM103;g__;s__
24_Oct_SF_Bin23_scaffold_13421_c1_1663-3171_1	24_Oct_SF_Bin23	d__Bacteria;p__Proteobacteria;c__Gammaproteobacteria;o__Pseudomonadales;f__Halieaceae;g__Halioglobus;s__
24_Oct_SF_Bin23_scaffold_13999_c1_3-1859_1	24_Oct_SF_Bin23	d__Bacteria;p__Proteobacteria;c__Gammaproteobacteria;o__Pseudomonadales;f__Halieaceae;g__Halioglobus;s__
24_Oct_SF_Bin28_scaffold_1402_c1_8605-10761_1	24_Oct_SF_Bin28	d__Bacteria;p__Proteobacteria;c__Gammaproteobacteria;o__Xanthomonadales;f__SZUA-36;g__JABDPF01;s__
24_Oct_SF_Bin28_scaffold_623_c1_13877-15841_1	24_Oct_SF_Bin28	d__Bacteria;p__Proteobacteria;c__Gammaproteobacteria;o__Xanthomonadales;f__SZUA-36;g__JABDPF01;s__
24_Oct_SF_Bin7_scaffold_1318_c1_8716-11100_1	24_Oct_SF_Bin7	d__Bacteria;p__Proteobacteria;c__Gammaproteobacteria;o__Xanthomonadales;f__SZUA-36;g__SZUA-36;s__
24_Oct_SF_Bin8_scaffold_10895_c1_1-2718_1	24_Oct_SF_Bin8	d__Bacteria;p__Zixibacteria;c__MSB-5A5;o__GN15;f__FEB-12;g__;s__
4_1_Jan_SF_Bin16_scaffold_449_c1_11722-15501_1	4_1_Jan_SF_Bin16	d__Bacteria;p__Nitrospirota;c__;o__;f__;g__;s__
4_1_Jan_SF_Bin28_scaffold_33945_c1_1-2166_1	4_1_Jan_SF_Bin28	d__Bacteria;p__Proteobacteria;c__Gammaproteobacteria;o__Burkholderiales;f__Burkholderiaceae;g__Rubrivivax;s__
4_1_Jan_SF_Bin28_scaffold_6786_c1_1-1785_1	4_1_Jan_SF_Bin28	d__Bacteria;p__Proteobacteria;c__Gammaproteobacteria;o__Burkholderiales;f__Burkholderiaceae;g__Rubrivivax;s__
4_1_Jan_SF_Bin56_scaffold_3117_c1_4229-8047_1	4_1_Jan_SF_Bin56	d__Bacteria;p__Proteobacteria;c__Gammaproteobacteria;o__Burkholderiales;f__SG8-41;g__Ga0077527;s__
4_1_Jan_SF_Bin59_scaffold_10558_c1_603-4304_1	4_1_Jan_SF_Bin59	d__Bacteria;p__Actinobacteriota;c__Actinomycetia;o__Nanopelagicales;f__;g__;s__
4_1_Jan_SF_Bin7_scaffold_9055_c1_416-4024_1	4_1_Jan_SF_Bin7	d__Bacteria;p__Actinobacteriota;c__Acidimicrobiia;o__UBA5794;f__;g__;s__
4_1_Jan_SF_Bin8_scaffold_18736_c1_3-1832_1	4_1_Jan_SF_Bin8	d__Bacteria;p__Proteobacteria;c__Gammaproteobacteria;o__Burkholderiales;f__Casimicrobiaceae;g__VBCG01;s__
4_1_Jan_SF_Bin8_scaffold_22892_c1_1689-2795_1	4_1_Jan_SF_Bin8	d__Bacteria;p__Proteobacteria;c__Gammaproteobacteria;o__Burkholderiales;f__Casimicrobiaceae;g__VBCG01;s__
4_1_Jan_SF_Bin8_scaffold_35096_c1_134-2146_1	4_1_Jan_SF_Bin8	d__Bacteria;p__Proteobacteria;c__Gammaproteobacteria;o__Burkholderiales;f__Casimicrobiaceae;g__VBCG01;s__
4_1_July_SF_Bin43_scaffold_3_c2_112681-116430_1	4_1_July_SF_Bin43	d__Bacteria;p__Desulfobacterota;c__GWC2-55-46;o__GWC2-55-46;f__DRQE01;g__;s__
4_1_July_SF_Bin45_scaffold_19_c1_175178-178945_1	4_1_July_SF_Bin45	d__Bacteria;p__Nitrospirota;c__JACRHL01;o__JACRHL01;f__JACRHL01;g__;s__
4_1_July_SF_Bin49_scaffold_29550_c1_2-1699_1	4_1_July_SF_Bin49	d__Bacteria;p__Proteobacteria;c__Gammaproteobacteria;o__Burkholderiales;f__Gallionellaceae;g__Gallionella;s__
4_1_July_SF_Bin60_scaffold_5339_c1_1030-4731_1	4_1_July_SF_Bin60	d__Bacteria;p__Desulfobacterota;c__Desulfobacteria;o__Desulfobacterales;f__UBA11574;g__UBA11574;s__
4_1_July_SF_Bin9_scaffold_2129_c1_2-1201_1	4_1_July_SF_Bin9	d__Bacteria;p__Proteobacteria;c__Gammaproteobacteria;o__S140-43;f__S140-43;g__;s__
4_1_July_SF_Bin9_scaffold_6567_c1_4307-6604_1	4_1_July_SF_Bin9	d__Bacteria;p__Proteobacteria;c__Gammaproteobacteria;o__S140-43;f__S140-43;g__;s__
4_1_May_SF_Bin1_scaffold_34346_c1_270-2654_1	4_1_May_SF_Bin1	d__Bacteria;p__Actinobacteriota;c__Acidimicrobiia;o__Acidimicrobiales;f__SZUA-35;g__CADEDH01;s__
4_1_May_SF_Bin11_scaffold_50484_c1_477-2240_1	4_1_May_SF_Bin11	d__Bacteria;p__Proteobacteria;c__Gammaproteobacteria;o__Burkholderiales;f__SG8-41;g__Ga0077527;s__
4_1_May_SF_Bin11_scaffold_9284_c1_2-1903_1	4_1_May_SF_Bin11	d__Bacteria;p__Proteobacteria;c__Gammaproteobacteria;o__Burkholderiales;f__SG8-41;g__Ga0077527;s__
4_1_May_SF_Bin13_scaffold_22104_c1_1-2157_1	4_1_May_SF_Bin13	d__Bacteria;p__Proteobacteria;c__Gammaproteobacteria;o__Burkholderiales;f__Gallionellaceae;g__Gallionella;s__
4_1_May_SF_Bin26_scaffold_930_c1_10437-14192_1	4_1_May_SF_Bin26	d__Bacteria;p__Proteobacteria;c__Gammaproteobacteria;o__Burkholderiales;f__Gallionellaceae;g__VIKH01;s__
4_1_May_SF_Bin47_scaffold_15154_c1_2-2683_1	4_1_May_SF_Bin47	d__Bacteria;p__Actinobacteriota;c__Acidimicrobiia;o__UBA5794;f__;g__;s__
4_1_May_SF_Bin62_scaffold_35714_c1_1-2475_1	4_1_May_SF_Bin62	d__Bacteria;p__Actinobacteriota;c__Actinomycetia;o__Nanopelagicales;f__;g__;s__
4_1_Oct_SF_Bin17_scaffold_32705_c1_1-1998_1	4_1_Oct_SF_Bin17	d__Bacteria;p__Actinobacteriota;c__Acidimicrobiia;o__UBA5794;f__;g__;s__
4_1_Oct_SF_Bin19_scaffold_26024_c1_3-2468_1	4_1_Oct_SF_Bin19	d__Bacteria;p__Actinobacteriota;c__Actinomycetia;o__Nanopelagicales;f__;g__;s__
4_1_Oct_SF_Bin29_scaffold_5813_c1_3-1814_1	4_1_Oct_SF_Bin29	d__Bacteria;p__Proteobacteria;c__Gammaproteobacteria;o__Burkholderiales;f__SG8-41;g__Ga0077527;s__
4_1_Oct_SF_Bin29_scaffold_6087_c1_3694-5832_1	4_1_Oct_SF_Bin29	d__Bacteria;p__Proteobacteria;c__Gammaproteobacteria;o__Burkholderiales;f__SG8-41;g__Ga0077527;s__
4_1_Oct_SF_Bin31_scaffold_16233_c1_1488-3269_1	4_1_Oct_SF_Bin31	d__Bacteria;p__Proteobacteria;c__Gammaproteobacteria;o__Burkholderiales;f__Burkholderiaceae;g__Rubrivivax;s__
4_1_Oct_SF_Bin49_scaffold_8381_c1_3945-4814_1	4_1_Oct_SF_Bin49	d__Bacteria;p__Proteobacteria;c__Gammaproteobacteria;o__Burkholderiales;f__Casimicrobiaceae;g__CAIWHR01;s__
4_1_Oct_SF_Bin51_scaffold_177_c1_14496-18275_1	4_1_Oct_SF_Bin51	d__Bacteria;p__Proteobacteria;c__Gammaproteobacteria;o__Burkholderiales;f__Burkholderiaceae;g__;s__
4_1_Oct_SF_Bin51_scaffold_3884_c1_1-3411_1	4_1_Oct_SF_Bin51	d__Bacteria;p__Proteobacteria;c__Gammaproteobacteria;o__Burkholderiales;f__Burkholderiaceae;g__;s__
8_1_Jan_SF_Bin107_scaffold_39618_c1_1-2421_1	8_1_Jan_SF_Bin107	d__Bacteria;p__Proteobacteria;c__Gammaproteobacteria;o__Burkholderiales;f__Burkholderiaceae;g__Hylemonella;s__
8_1_Jan_SF_Bin17_scaffold_12392_c1_1939-4881_1	8_1_Jan_SF_Bin17	d__Bacteria;p__Proteobacteria;c__Gammaproteobacteria;o__JABURT01;f__JABURT01;g__JABURT01;s__
8_1_Jan_SF_Bin23_scaffold_72_c1_100478-103468_1	8_1_Jan_SF_Bin23	d__Bacteria;p__Proteobacteria;c__Gammaproteobacteria;o__SZUA-152;f__SZUA-152;g__;s__
8_1_Jan_SF_Bin31_scaffold_24_c1_136027-139776_1	8_1_Jan_SF_Bin31	d__Bacteria;p__Proteobacteria;c__Gammaproteobacteria;o__Nitrosococcales;f__Methylophagaceae;g__GCA-002733105;s__
8_1_Jan_SF_Bin34_scaffold_7828_c1_3271-6450_1	8_1_Jan_SF_Bin34	d__Bacteria;p__Actinobacteriota;c__Acidimicrobiia;o__UBA5794;f__JAENVV01;g__;s__
8_1_Jan_SF_Bin42_scaffold_1197_c1_12356-15979_1	8_1_Jan_SF_Bin42	d__Bacteria;p__Bacteroidota;c__Bacteroidia;o__Cytophagales;f__Cyclobacteriaceae;g__;s__
8_1_Jan_SF_Bin73_scaffold_8598_c1_1215-4853_1	8_1_Jan_SF_Bin73	d__Bacteria;p__Actinobacteriota;c__Acidimicrobiia;o__UBA5794;f__JAENVV01;g__JAENVV01;s__
8_1_Jan_SF_Bin77_scaffold_910_c1_3262-7044_1	8_1_Jan_SF_Bin77	d__Bacteria;p__Proteobacteria;c__Gammaproteobacteria;o__Enterobacterales;f__Kangiellaceae;g__;s__
8_1_Jan_SF_Bin88_scaffold_32364_c1_2-2722_1	8_1_Jan_SF_Bin88	d__Bacteria;p__Proteobacteria;c__Alphaproteobacteria;o__Rhodobacterales;f__Rhodobacteraceae;g__Albidovulum;s__
8_1_July_SF_Bin21_scaffold_623_c1_15714-19490_1	8_1_July_SF_Bin21	d__Bacteria;p__Nitrospirota;c__JACRHL01;o__JACRHL01;f__JACRHL01;g__;s__
8_1_July_SF_Bin26_scaffold_185_c1_44806-46521_1	8_1_July_SF_Bin26	d__Bacteria;p__SAR324;c__SAR324;o__XYD2-FULL-50-16;f__XYD2-FULL-50-16;g__;s__
8_1_July_SF_Bin31_scaffold_10079_c1_2581-4893_1	8_1_July_SF_Bin31	d__Bacteria;p__Proteobacteria;c__Alphaproteobacteria;o__Rhodobacterales;f__Rhodobacteraceae;g__Albidovulum;s__
8_1_July_SF_Bin31_scaffold_5607_c1_5302-6891_1	8_1_July_SF_Bin31	d__Bacteria;p__Proteobacteria;c__Alphaproteobacteria;o__Rhodobacterales;f__Rhodobacteraceae;g__Albidovulum;s__
8_1_July_SF_Bin47_scaffold_862_c1_9414-13052_1	8_1_July_SF_Bin47	d__Bacteria;p__Actinobacteriota;c__Acidimicrobiia;o__UBA5794;f__JAENVV01;g__JAENVV01;s__
8_1_July_SF_Bin52_scaffold_14149_c1_3-2708_1	8_1_July_SF_Bin52	d__Bacteria;p__Actinobacteriota;c__Acidimicrobiia;o__Acidimicrobiales;f__SZUA-35;g__CADEDH01;s__
8_1_July_SF_Bin52_scaffold_35090_c1_2-2356_1	8_1_July_SF_Bin52	d__Bacteria;p__Actinobacteriota;c__Acidimicrobiia;o__Acidimicrobiales;f__SZUA-35;g__CADEDH01;s__
8_1_July_SF_Bin7_scaffold_25974_c1_1216-2805_1	8_1_July_SF_Bin7	d__Bacteria;p__Actinobacteriota;c__Acidimicrobiia;o__UBA5794;f__UBA4744;g__UBA4744;s__
8_1_July_SF_Bin7_scaffold_32954_c1_2-2443_1	8_1_July_SF_Bin7	d__Bacteria;p__Actinobacteriota;c__Acidimicrobiia;o__UBA5794;f__UBA4744;g__UBA4744;s__
8_1_Oct_SF_Bin101_scaffold_1591_c1_9889-13671_1	8_1_Oct_SF_Bin101	d__Bacteria;p__Proteobacteria;c__Gammaproteobacteria;o__Enterobacterales;f__Kangiellaceae;g__;s__
8_1_Oct_SF_Bin105_scaffold_18133_c1_3357-5393_1	8_1_Oct_SF_Bin105	d__Bacteria;p__Proteobacteria;c__Gammaproteobacteria;o__Nitrosococcales;f__Methylophagaceae;g__GCA-002733105;s__
8_1_Oct_SF_Bin11_scaffold_31120_c1_2902-3876_1	8_1_Oct_SF_Bin11	d__Bacteria;p__Bacteroidota;c__Bacteroidia;o__Cytophagales;f__Cyclobacteriaceae;g__;s__
8_1_Oct_SF_Bin23_scaffold_518_c1_24360-28100_1	8_1_Oct_SF_Bin23	d__Bacteria;p__Proteobacteria;c__Alphaproteobacteria;o__Micavibrionales;f__Micavibrionaceae;g__UBA1672;s__
8_1_Oct_SF_Bin56_scaffold_22643_c1_1-2223_1	8_1_Oct_SF_Bin56	d__Bacteria;p__Proteobacteria;c__Gammaproteobacteria;o__Burkholderiales;f__Burkholderiaceae;g__Hylemonella;s__
8_1_Oct_SF_Bin56_scaffold_77098_c1_407-2119_1	8_1_Oct_SF_Bin56	d__Bacteria;p__Proteobacteria;c__Gammaproteobacteria;o__Burkholderiales;f__Burkholderiaceae;g__Hylemonella;s__
8_1_Oct_SF_Bin95_scaffold_2259_c1_1-1788_1	8_1_Oct_SF_Bin95	d__Bacteria;p__Proteobacteria;c__Gammaproteobacteria;o__Thiohalomonadales;f__Thiohalomonadaceae;g__;s__
8_1_Oct_SF_Bin95_scaffold_814_c1_22250-24358_1	8_1_Oct_SF_Bin95	d__Bacteria;p__Proteobacteria;c__Gammaproteobacteria;o__Thiohalomonadales;f__Thiohalomonadaceae;g__;s__
8_1_Oct_SF_Bin98_scaffold_173_c1_28567-32319_1	8_1_Oct_SF_Bin98	d__Bacteria;p__Proteobacteria;c__Gammaproteobacteria;o__SZUA-152;f__SZUA-152;g__;s__

## Sheet: NxrA
NxrA	Scaffold_length_fna_(bp)	MAG	GTDBtk
8_1_Oct_SF_Bin69_scaffold_533_c1_22161-25622_1	30594	8_1_Oct_SF_Bin69	d__Bacteria;p__Nitrospinota;c__Nitrospinia;o__Nitrospinales;f__Nitrospinaceae;g__SZUA-226;s__
4_1_Jan_SF_Bin27_scaffold_2587_c1_5219-8656_1	10588	4_1_Jan_SF_Bin27	d__Bacteria;p__Nitrospirota;c__Nitrospiria;o__Nitrospirales;f__Nitrospiraceae;g__Nitrospira_F;s__
4_1_Jan_SF_Bin41_scaffold_139_c1_22131-25568_1	55966	4_1_Jan_SF_Bin41	d__Bacteria;p__Nitrospirota;c__Nitrospiria;o__Nitrospirales;f__Nitrospiraceae;g__Nitrospira_F;s__
4_1_Jan_SF_Bin42_scaffold_63_c1_47475-50912_1	79976	4_1_Jan_SF_Bin42	d__Bacteria;p__Nitrospirota;c__Nitrospiria;o__Nitrospirales;f__Nitrospiraceae;g__Nitrospira_F;s__
4_1_Jan_SF_Bin53_scaffold_516_c1_9057-12494_1	26604	4_1_Jan_SF_Bin53	d__Bacteria;p__Nitrospirota;c__Nitrospiria;o__Nitrospirales;f__Nitrospiraceae;g__Nitrospira_F;s__
4_1_July_SF_Bin50_scaffold_5214_c1_1771-5208_1	7591	4_1_July_SF_Bin50	d__Bacteria;p__Nitrospirota;c__Nitrospiria;o__Nitrospirales;f__Nitrospiraceae;g__Nitrospira_F;s__
4_1_July_SF_Bin53_scaffold_1502_c1_5220-8657_1	16380	4_1_July_SF_Bin53	d__Bacteria;p__Nitrospirota;c__Nitrospiria;o__Nitrospirales;f__Nitrospiraceae;g__Nitrospira_F;s__
4_1_May_SF_Bin36_scaffold_470_c1_9057-12494_1	26603	4_1_May_SF_Bin36	d__Bacteria;p__Nitrospirota;c__Nitrospiria;o__Nitrospirales;f__Nitrospiraceae;g__Nitrospira_F;s__
4_1_May_SF_Bin53_scaffold_210_c1_2777-6214_1	49924	4_1_May_SF_Bin53	d__Bacteria;p__Nitrospirota;c__Nitrospiria;o__Nitrospirales;f__Nitrospiraceae;g__Nitrospira_F;s__
4_1_May_SF_Bin59_scaffold_2667_c1_1933-5370_1	10588	4_1_May_SF_Bin59	d__Bacteria;p__Nitrospirota;c__Nitrospiria;o__Nitrospirales;f__Nitrospiraceae;g__Nitrospira_F;s__
4_1_May_SF_Bin6_scaffold_29073_c1_2-1849_1	2864	4_1_May_SF_Bin6	d__Bacteria;p__Nitrospirota;c__Nitrospiria;o__Nitrospirales;f__Nitrospiraceae;g__Nitrospira_F;s__
4_1_May_SF_Bin6_scaffold_55451_c1_256-2151_1	2151	4_1_May_SF_Bin6	d__Bacteria;p__Nitrospirota;c__Nitrospiria;o__Nitrospirales;f__Nitrospiraceae;g__Nitrospira_F;s__
4_1_May_SF_Bin63_scaffold_306_c1_11473-14910_1	40335	4_1_May_SF_Bin63	d__Bacteria;p__Nitrospirota;c__Nitrospiria;o__Nitrospirales;f__Nitrospiraceae;g__Nitrospira_F;s__
4_1_Oct_SF_Bin23_scaffold_281_c1_33495-36530_1	36532	4_1_Oct_SF_Bin23	d__Bacteria;p__Nitrospirota;c__Nitrospiria;o__Nitrospirales;f__Nitrospiraceae;g__Nitrospira_F;s__
4_1_Oct_SF_Bin23_scaffold_6253_c1_3-527_1	5745	4_1_Oct_SF_Bin23	d__Bacteria;p__Nitrospirota;c__Nitrospiria;o__Nitrospirales;f__Nitrospiraceae;g__Nitrospira_F;s__
4_1_Oct_SF_Bin26_scaffold_1627_c1_8922-12359_1	13123	4_1_Oct_SF_Bin26	d__Bacteria;p__Nitrospirota;c__Nitrospiria;o__Nitrospirales;f__Nitrospiraceae;g__Nitrospira_F;s__
4_1_Oct_SF_Bin30_scaffold_44_c1_45082-48519_1	84988	4_1_Oct_SF_Bin30	d__Bacteria;p__Nitrospirota;c__Nitrospiria;o__Nitrospirales;f__Nitrospiraceae;g__Nitrospira_F;s__
4_1_Oct_SF_Bin52_scaffold_1102_c1_4203-7640_1	16696	4_1_Oct_SF_Bin52	d__Bacteria;p__Nitrospirota;c__Nitrospiria;o__Nitrospirales;f__Nitrospiraceae;g__Nitrospira_F;s__
4_1_Oct_SF_Bin9_scaffold_32216_c1_2-1093_1	2172	4_1_Oct_SF_Bin9	d__Bacteria;p__Nitrospirota;c__Nitrospiria;o__Nitrospirales;f__Nitrospiraceae;g__Nitrospira_F;s__
4_1_Oct_SF_Bin9_scaffold_5519_c1_3-1394_1	6195	4_1_Oct_SF_Bin9	d__Bacteria;p__Nitrospirota;c__Nitrospiria;o__Nitrospirales;f__Nitrospiraceae;g__Nitrospira_F;s__
8_1_July_SF_Bin45_scaffold_328_c1_25427-28864_1	34331	8_1_July_SF_Bin45	d__Bacteria;p__Nitrospirota;c__Nitrospiria;o__Nitrospirales;f__Nitrospiraceae;g__Nitrospira_F;s__
8_1_Oct_SF_Bin26_scaffold_529_c1_22224-25661_1	30641	8_1_Oct_SF_Bin26	d__Bacteria;p__Nitrospirota;c__Nitrospiria;o__Nitrospirales;f__Nitrospiraceae;g__Nitrospira_F;s__
8_1_Oct_SF_Bin54_scaffold_3738_c1_2283-5720_1	12121	8_1_Oct_SF_Bin54	d__Bacteria;p__Nitrospirota;c__Nitrospiria;o__Nitrospirales;f__Nitrospiraceae;g__Nitrospira_F;s__
8_1_Oct_SF_Bin63_scaffold_10579_c1_4056-7268_1	7268	8_1_Oct_SF_Bin63	d__Bacteria;p__Nitrospirota;c__Nitrospiria;o__Nitrospirales;f__Nitrospiraceae;g__Nitrospira_F;s__
8_1_Oct_SF_Bin63_scaffold_42037_c1_3-458_1	3190	8_1_Oct_SF_Bin63	d__Bacteria;p__Nitrospirota;c__Nitrospiria;o__Nitrospirales;f__Nitrospiraceae;g__Nitrospira_F;s__
13_July_SF_Bin24_scaffold_105_c1_16097-19534_1	68210	13_July_SF_Bin24	d__Bacteria;p__Nitrospirota;c__Nitrospiria;o__Nitrospirales;f__UBA8639;g__UBA8639;s__
21_July_SF_Bin14_scaffold_23234_c1_940-1698_1	1699	21_July_SF_Bin14	d__Bacteria;p__Nitrospirota;c__Nitrospiria;o__Nitrospirales;f__UBA8639;g__UBA8639;s__
8_1_Jan_SF_Bin68_scaffold_1744_c1_1310-4747_1	15455	8_1_Jan_SF_Bin68	d__Bacteria;p__Nitrospirota;c__Nitrospiria;o__Nitrospirales;f__UBA8639;g__UBA8639;s__
8_1_July_SF_Bin60_scaffold_14170_c1_3626-4024_1	4025	8_1_July_SF_Bin60	d__Bacteria;p__Nitrospirota;c__Nitrospiria;o__Nitrospirales;f__UBA8639;g__UBA8639;s__
8_1_July_SF_Bin61_scaffold_9598_c1_1-1131_1	5036	8_1_July_SF_Bin61	d__Bacteria;p__Nitrospirota;c__Nitrospiria;o__Nitrospirales;f__UBA8639;g__UBA8639;s__
8_1_Oct_SF_Bin49_scaffold_5130_c1_6439-9876_1	10400	8_1_Oct_SF_Bin49	d__Bacteria;p__Nitrospirota;c__Nitrospiria;o__Nitrospirales;f__UBA8639;g__UBA8639;s__
8_1_Oct_SF_Bin74_scaffold_5542_c1_2-1270_1	10029	8_1_Oct_SF_Bin74	d__Bacteria;p__Nitrospirota;c__Nitrospiria;o__Nitrospirales;f__UBA8639;g__UBA8639;s__

## Sheet: NarGNxrA
NarG/NxrA	Scaffold_length_fna_(bp)	MAG	GTDBtk
13_May_SF_Bin61_scaffold_30185_c1_2261-3481_1	3481	13_May_SF_Bin61	d__Bacteria;p__Acidobacteriota;c__Mor1;o__J045;f__J045;g__;s__
13_May_SF_Bin61_scaffold_51921_c1_3-1277_1	2452	13_May_SF_Bin61	d__Bacteria;p__Acidobacteriota;c__Mor1;o__J045;f__J045;g__;s__
4_1_Jan_SF_Bin21_scaffold_19364_c1_2-1714_1	3102	4_1_Jan_SF_Bin21	d__Bacteria;p__Acidobacteriota;c__Vicinamibacteria;o__Vicinamibacterales;f__UBA2999;g__VFZN01;s__
21_Jan_SF_Bin67_scaffold_32672_c1_3-2330_1	3644	21_Jan_SF_Bin67	d__Bacteria;p__Actinobacteriota;c__Acidimicrobiia;o__Acidimicrobiales;f__;g__;s__
4_1_Jan_SF_Bin61_scaffold_1987_c1_3-2501_1	5797	4_1_Jan_SF_Bin61	d__Bacteria;p__Actinobacteriota;c__Thermoleophilia;o__Gaiellales;f__Gaiellaceae;g__;s__
4_1_Jan_SF_Bin61_scaffold_2525_c1_3-704_1	10737	4_1_Jan_SF_Bin61	d__Bacteria;p__Actinobacteriota;c__Thermoleophilia;o__Gaiellales;f__Gaiellaceae;g__;s__
4_1_May_SF_Bin52_scaffold_5716_c1_3776-6595_1	6595	4_1_May_SF_Bin52	d__Bacteria;p__Actinobacteriota;c__Thermoleophilia;o__Gaiellales;f__Gaiellaceae;g__Gaiella;s__
4_1_May_SF_Bin52_scaffold_9609_c1_4099-4944_1	4944	4_1_May_SF_Bin52	d__Bacteria;p__Actinobacteriota;c__Thermoleophilia;o__Gaiellales;f__Gaiellaceae;g__Gaiella;s__
4_1_Oct_SF_Bin32_scaffold_7496_c1_2-2440_1	2440	4_1_Oct_SF_Bin32	d__Bacteria;p__Actinobacteriota;c__Thermoleophilia;o__Gaiellales;f__Gaiellaceae;g__Gaiella;s__
4_1_Oct_SF_Bin32_scaffold_7496_c2_2-505_1	2698	4_1_Oct_SF_Bin32	d__Bacteria;p__Actinobacteriota;c__Thermoleophilia;o__Gaiellales;f__Gaiellaceae;g__Gaiella;s__
4_1_Jan_SF_Bin18_scaffold_700_c1_6270-9776_1	22707	4_1_Jan_SF_Bin18	d__Bacteria;p__Actinobacteriota;c__Thermoleophilia;o__Gaiellales;f__Gaiellaceae;g__GMQP-bins7;s__
4_1_May_SF_Bin55_scaffold_648_c1_1006-4512_1	25999	4_1_May_SF_Bin55	d__Bacteria;p__Actinobacteriota;c__Thermoleophilia;o__Gaiellales;f__Gaiellaceae;g__GMQP-bins7;s__
4_1_Oct_SF_Bin14_scaffold_2633_c1_666-4172_1	9519	4_1_Oct_SF_Bin14	d__Bacteria;p__Actinobacteriota;c__Thermoleophilia;o__Gaiellales;f__Gaiellaceae;g__GMQP-bins7;s__
13_July_SF_Bin2_scaffold_20759_c1_1114-3024_1	3024	13_July_SF_Bin2	d__Bacteria;p__Desulfobacterota_B;c__Binatia;o__UBA9968;f__UBA9968;g__;s__
13_July_SF_Bin2_scaffold_7244_c1_4398-5624_1	5624	13_July_SF_Bin2	d__Bacteria;p__Desulfobacterota_B;c__Binatia;o__UBA9968;f__UBA9968;g__;s__
13_July_SF_Bin2_scaffold_9994_c1_2-2545_1	4639	13_July_SF_Bin2	d__Bacteria;p__Desulfobacterota_B;c__Binatia;o__UBA9968;f__UBA9968;g__;s__
8_1_May_SF_Bin5_scaffold_55982_c1_701-4138_1	4283	8_1_May_SF_Bin5	d__Bacteria;p__Gemmatimonadota;c__Gemmatimonadetes;o__Gemmatimonadales;f__GWC2-71-9;g__;s__

## Sheet: Rubisco
RbcL	Type	MAG	GTDBtk
13_May_SF_Bin40_scaffold_62152_c1_1205-2179_1	type IA	13_May_SF_Bin40	d__Bacteria;p__Proteobacteria;c__Alphaproteobacteria;o__Bin65;f__;g__;s__
21_May_SF_Bin33_scaffold_23072_c1_10-1431_1	type IA	21_May_SF_Bin33	d__Bacteria;p__Proteobacteria;c__Alphaproteobacteria;o__Kiloniellales;f__J153;g__;s__
24_Jan_SF_Bin23_scaffold_11551_c1_57-1478_1	type IA	24_Jan_SF_Bin23	d__Bacteria;p__Proteobacteria;c__Alphaproteobacteria;o__Kiloniellales;f__J153;g__;s__
24_July_SF_Bin17_scaffold_18930_c1_326-1747_1	type IA	24_July_SF_Bin17	d__Bacteria;p__Proteobacteria;c__Alphaproteobacteria;o__Kiloniellales;f__J153;g__;s__
24_Oct_SF_Bin19_scaffold_24340_c1_182-1603_1	type IA	24_Oct_SF_Bin19	d__Bacteria;p__Proteobacteria;c__Alphaproteobacteria;o__Kiloniellales;f__J153;g__;s__
8_1_Jan_SF_Bin95_scaffold_10475_c1_1-336_1	type IA	8_1_Jan_SF_Bin95	d__Bacteria;p__Proteobacteria;c__Alphaproteobacteria;o__Rhodospirillales;f__Magnetovibrionaceae;g__;s__
13_May_SF_Bin13_scaffold_15839_c1_623-2038_1	type IA	13_May_SF_Bin13	d__Bacteria;p__Proteobacteria;c__Alphaproteobacteria;o__UBA8366;f__JADFVY01;g__JADFVY01;s__
8_1_Jan_SF_Bin60_scaffold_59682_c1_2-1402_1	type IA	8_1_Jan_SF_Bin60	d__Bacteria;p__Proteobacteria;c__Alphaproteobacteria;o__UBA8366;f__JADFVY01;g__JADFVY01;s__
21_Jan_SF_Bin47_scaffold_705_c1_22226-23641_1	type IA	21_Jan_SF_Bin47	d__Bacteria;p__Proteobacteria;c__Gammaproteobacteria;o__Acidiferrobacterales;f__SPGG2;g__SPGG2;s__
13_Jan_SF_Bin62_scaffold_10308_c1_3303-3611_1	type IA	13_Jan_SF_Bin62	d__Bacteria;p__Proteobacteria;c__Gammaproteobacteria;o__Acidiferrobacterales;f__Sulfurifustaceae;g__Sulfuricaulis;s__
13_Jan_SF_Bin62_scaffold_3487_c1_1-1275_1	type IA	13_Jan_SF_Bin62	d__Bacteria;p__Proteobacteria;c__Gammaproteobacteria;o__Acidiferrobacterales;f__Sulfurifustaceae;g__Sulfuricaulis;s__
13_July_SF_Bin52_scaffold_209_c1_32896-34326_1	type IA	13_July_SF_Bin52	d__Bacteria;p__Proteobacteria;c__Gammaproteobacteria;o__Acidiferrobacterales;f__Sulfurifustaceae;g__Sulfuricaulis;s__
13_May_SF_Bin71_scaffold_80_c1_41774-43204_1	type IA	13_May_SF_Bin71	d__Bacteria;p__Proteobacteria;c__Gammaproteobacteria;o__Acidiferrobacterales;f__Sulfurifustaceae;g__Sulfuricaulis;s__
13_Oct_SF_Bin7_scaffold_944_c1_9559-10065_1	type IA	13_Oct_SF_Bin7	d__Bacteria;p__Proteobacteria;c__Gammaproteobacteria;o__Acidiferrobacterales;f__Sulfurifustaceae;g__Sulfuricaulis;s__
8_1_July_SF_Bin39_scaffold_230_c1_39261-40691_1	type IA	8_1_July_SF_Bin39	d__Bacteria;p__Proteobacteria;c__Gammaproteobacteria;o__Acidiferrobacterales;f__Sulfurifustaceae;g__Sulfuricaulis;s__
8_1_May_SF_Bin19_scaffold_17627_c1_3040-3720_1	type IA	8_1_May_SF_Bin19	d__Bacteria;p__Proteobacteria;c__Gammaproteobacteria;o__Acidiferrobacterales;f__SZUA-150;g__;s__
8_1_Oct_SF_Bin102_scaffold_6_c1_183322-184740_1	type IA	8_1_Oct_SF_Bin102	d__Bacteria;p__Proteobacteria;c__Gammaproteobacteria;o__Acidiferrobacterales;f__SZUA-150;g__;s__
4_1_July_SF_Bin12_scaffold_39224_c1_1-588_1	type IA	4_1_July_SF_Bin12	d__Bacteria;p__Proteobacteria;c__Gammaproteobacteria;o__Acidiferrobacterales;f__UBA6901;g__UBA6901;s__
8_1_Jan_SF_Bin19_scaffold_47646_c1_1957-2169_1	type IA	8_1_Jan_SF_Bin19	d__Bacteria;p__Proteobacteria;c__Gammaproteobacteria;o__AKS1;f__AKS1;g__;s__
8_1_Jan_SF_Bin19_scaffold_6075_c1_3-1331_1	type IA	8_1_Jan_SF_Bin19	d__Bacteria;p__Proteobacteria;c__Gammaproteobacteria;o__AKS1;f__AKS1;g__;s__
8_1_Jan_SF_Bin75_scaffold_21065_c1_2-298_1	type IA	8_1_Jan_SF_Bin75	d__Bacteria;p__Proteobacteria;c__Gammaproteobacteria;o__AKS1;f__AKS1;g__;s__
8_1_Jan_SF_Bin75_scaffold_28915_c1_2-406_1	type IA	8_1_Jan_SF_Bin75	d__Bacteria;p__Proteobacteria;c__Gammaproteobacteria;o__AKS1;f__AKS1;g__;s__
8_1_July_SF_Bin70_scaffold_35029_c1_2087-2359_1	type IA	8_1_July_SF_Bin70	d__Bacteria;p__Proteobacteria;c__Gammaproteobacteria;o__AKS1;f__AKS1;g__;s__
8_1_Oct_SF_Bin104_scaffold_23390_c1_4423-4635_1	type IA	8_1_Oct_SF_Bin104	d__Bacteria;p__Proteobacteria;c__Gammaproteobacteria;o__AKS1;f__AKS1;g__;s__
8_1_Oct_SF_Bin104_scaffold_5237_c2_6649-7977_1	type IA	8_1_Oct_SF_Bin104	d__Bacteria;p__Proteobacteria;c__Gammaproteobacteria;o__AKS1;f__AKS1;g__;s__
13_May_SF_Bin64_scaffold_16090_c1_224-1642_1	type IA	13_May_SF_Bin64	d__Bacteria;p__Proteobacteria;c__Gammaproteobacteria;o__Arenicellales;f__JAANXG01;g__;s__
21_Jan_SF_Bin39_scaffold_12709_c1_4712-6130_1	type IA	21_Jan_SF_Bin39	d__Bacteria;p__Proteobacteria;c__Gammaproteobacteria;o__Arenicellales;f__JAANXG01;g__;s__
24_Oct_SF_Bin25_scaffold_9630_c1_2479-3777_1	type IA	24_Oct_SF_Bin25	d__Bacteria;p__Proteobacteria;c__Gammaproteobacteria;o__BM003;f__BM003;g__BM003;s__BM003 sp002868855
8_1_Jan_SF_Bin107_scaffold_20189_c1_3144-3614_1	type IA	8_1_Jan_SF_Bin107	d__Bacteria;p__Proteobacteria;c__Gammaproteobacteria;o__Burkholderiales;f__Burkholderiaceae;g__Hylemonella;s__
8_1_Jan_SF_Bin107_scaffold_38254_c1_2-1093_1	type IA	8_1_Jan_SF_Bin107	d__Bacteria;p__Proteobacteria;c__Gammaproteobacteria;o__Burkholderiales;f__Burkholderiaceae;g__Hylemonella;s__
8_1_Oct_SF_Bin56_scaffold_1245_c1_14937-16358_1	type IA	8_1_Oct_SF_Bin56	d__Bacteria;p__Proteobacteria;c__Gammaproteobacteria;o__Burkholderiales;f__Burkholderiaceae;g__Hylemonella;s__
4_1_July_SF_Bin49_scaffold_4929_c1_2106-3524_1	type IA	4_1_July_SF_Bin49	d__Bacteria;p__Proteobacteria;c__Gammaproteobacteria;o__Burkholderiales;f__Gallionellaceae;g__Gallionella;s__
8_1_Jan_SF_Bin93_scaffold_17840_c1_1-651_1	type IA	8_1_Jan_SF_Bin93	d__Bacteria;p__Proteobacteria;c__Gammaproteobacteria;o__Burkholderiales;f__Nitrosomonadaceae;g__Nitrosomonas;s__
4_1_Oct_SF_Bin40_scaffold_5071_c1_1548-2975_1	type IA	4_1_Oct_SF_Bin40	d__Bacteria;p__Proteobacteria;c__Gammaproteobacteria;o__Burkholderiales;f__Usitatibacteraceae;g__FEB-7;s__
13_July_SF_Bin35_scaffold_1505_c1_13789-14784_1	type IA	13_July_SF_Bin35	d__Bacteria;p__Proteobacteria;c__Gammaproteobacteria;o__GCA-001735895;f__GCA-001735895;g__GCA-001735895;s__
13_May_SF_Bin41_scaffold_799_c1_2293-3717_1	type IA	13_May_SF_Bin41	d__Bacteria;p__Proteobacteria;c__Gammaproteobacteria;o__GCA-001735895;f__GCA-001735895;g__GCA-001735895;s__
21_Jan_SF_Bin30_scaffold_98_c1_65884-67308_1	type IA	21_Jan_SF_Bin30	d__Bacteria;p__Proteobacteria;c__Gammaproteobacteria;o__GCA-001735895;f__GCA-001735895;g__GCA-001735895;s__
21_Jan_SF_Bin37_scaffold_274_c1_44969-46393_1	type IA	21_Jan_SF_Bin37	d__Bacteria;p__Proteobacteria;c__Gammaproteobacteria;o__GCA-001735895;f__GCA-001735895;g__GCA-001735895;s__
21_Jan_SF_Bin69_scaffold_11195_c1_6435-6740_1	type IA	21_Jan_SF_Bin69	d__Bacteria;p__Proteobacteria;c__Gammaproteobacteria;o__GCA-001735895;f__GCA-001735895;g__GCA-001735895;s__
21_Jan_SF_Bin69_scaffold_370_c1_44242-44760_1	type IA	21_Jan_SF_Bin69	d__Bacteria;p__Proteobacteria;c__Gammaproteobacteria;o__GCA-001735895;f__GCA-001735895;g__GCA-001735895;s__
21_Jan_SF_Bin69_scaffold_838_c1_1-1020_1	type IA	21_Jan_SF_Bin69	d__Bacteria;p__Proteobacteria;c__Gammaproteobacteria;o__GCA-001735895;f__GCA-001735895;g__GCA-001735895;s__
21_Oct_SF_Bin23_scaffold_1731_c1_6247-6474_1	type IA	21_Oct_SF_Bin23	d__Bacteria;p__Proteobacteria;c__Gammaproteobacteria;o__GCA-001735895;f__GCA-001735895;g__GCA-001735895;s__
8_1_Jan_SF_Bin27_scaffold_1904_c1_11896-13314_1	type IA	8_1_Jan_SF_Bin27	d__Bacteria;p__Proteobacteria;c__Gammaproteobacteria;o__GCA-001735895;f__GCA-001735895;g__GCA-001735895;s__
8_1_Jan_SF_Bin17_scaffold_3285_c1_5062-6483_1	type IA	8_1_Jan_SF_Bin17	d__Bacteria;p__Proteobacteria;c__Gammaproteobacteria;o__JABURT01;f__JABURT01;g__JABURT01;s__
8_1_Jan_SF_Bin3_1_scaffold_10006_c1_5248-5565_1	type IA	8_1_Jan_SF_Bin3_1	d__Bacteria;p__Proteobacteria;c__Gammaproteobacteria;o__JABURT01;f__JABURT01;g__JABURT01;s__
8_1_Jan_SF_Bin3_1_scaffold_2729_c2_4020-5441_1	type IA	8_1_Jan_SF_Bin3_1	d__Bacteria;p__Proteobacteria;c__Gammaproteobacteria;o__JABURT01;f__JABURT01;g__JABURT01;s__
8_1_Jan_SF_Bin31_scaffold_124_c1_31902-33323_1	type IA	8_1_Jan_SF_Bin31	d__Bacteria;p__Proteobacteria;c__Gammaproteobacteria;o__Nitrosococcales;f__Methylophagaceae;g__GCA-002733105;s__
8_1_Oct_SF_Bin105_scaffold_19589_c1_1993-3414_1	type IA	8_1_Oct_SF_Bin105	d__Bacteria;p__Proteobacteria;c__Gammaproteobacteria;o__Nitrosococcales;f__Methylophagaceae;g__GCA-002733105;s__
13_Jan_SF_Bin23_scaffold_1117_c1_8081-9502_1	type IA	13_Jan_SF_Bin23	d__Bacteria;p__Proteobacteria;c__Gammaproteobacteria;o__S140-43;f__S140-43;g__;s__
4_1_July_SF_Bin9_scaffold_4031_c1_1419-2840_1	type IA	4_1_July_SF_Bin9	d__Bacteria;p__Proteobacteria;c__Gammaproteobacteria;o__S140-43;f__S140-43;g__;s__
4_1_May_SF_Bin75_scaffold_30_c1_21905-23326_1	type IA	4_1_May_SF_Bin75	d__Bacteria;p__Proteobacteria;c__Gammaproteobacteria;o__S140-43;f__S140-43;g__;s__
4_1_May_SF_Bin75_scaffold_644_c1_1-1104_1	type IA	4_1_May_SF_Bin75	d__Bacteria;p__Proteobacteria;c__Gammaproteobacteria;o__S140-43;f__S140-43;g__;s__
8_1_Jan_SF_Bin1_scaffold_11868_c1_1776-3194_1	type IA	8_1_Jan_SF_Bin1	d__Bacteria;p__Proteobacteria;c__Gammaproteobacteria;o__S140-43;f__S140-43;g__;s__
8_1_Jan_SF_Bin103_scaffold_2136_c1_11612-13024_1	type IA	8_1_Jan_SF_Bin103	d__Bacteria;p__Proteobacteria;c__Gammaproteobacteria;o__S140-43;f__S140-43;g__;s__
8_1_Jan_SF_Bin103_scaffold_4430_c1_2258-3679_1	type IA	8_1_Jan_SF_Bin103	d__Bacteria;p__Proteobacteria;c__Gammaproteobacteria;o__S140-43;f__S140-43;g__;s__
8_1_Jan_SF_Bin33_scaffold_13447_c1_4228-4635_1	type IA	8_1_Jan_SF_Bin33	d__Bacteria;p__Proteobacteria;c__Gammaproteobacteria;o__S140-43;f__S140-43;g__;s__
8_1_July_SF_Bin55_scaffold_5_c1_284521-285942_1	type IA	8_1_July_SF_Bin55	d__Bacteria;p__Proteobacteria;c__Gammaproteobacteria;o__S140-43;f__S140-43;g__;s__
8_1_Oct_SF_Bin3_scaffold_13670_c1_5430-6329_1	type IA	8_1_Oct_SF_Bin3	d__Bacteria;p__Proteobacteria;c__Gammaproteobacteria;o__S140-43;f__S140-43;g__;s__
8_1_Oct_SF_Bin3_scaffold_4160_c1_6075-7487_1	type IA	8_1_Oct_SF_Bin3	d__Bacteria;p__Proteobacteria;c__Gammaproteobacteria;o__S140-43;f__S140-43;g__;s__
8_1_Oct_SF_Bin47_scaffold_14511_c1_1-240_1	type IA	8_1_Oct_SF_Bin47	d__Bacteria;p__Proteobacteria;c__Gammaproteobacteria;o__S140-43;f__S140-43;g__;s__
8_1_Oct_SF_Bin47_scaffold_5145_c1_9157-10389_1	type IA	8_1_Oct_SF_Bin47	d__Bacteria;p__Proteobacteria;c__Gammaproteobacteria;o__S140-43;f__S140-43;g__;s__
8_1_Jan_SF_Bin23_scaffold_55_c1_70815-72233_1	type IA	8_1_Jan_SF_Bin23	d__Bacteria;p__Proteobacteria;c__Gammaproteobacteria;o__SZUA-152;f__SZUA-152;g__;s__
8_1_Oct_SF_Bin98_scaffold_235_c1_22204-23622_1	type IA	8_1_Oct_SF_Bin98	d__Bacteria;p__Proteobacteria;c__Gammaproteobacteria;o__SZUA-152;f__SZUA-152;g__;s__
8_1_Jan_SF_Bin54_scaffold_478_c1_23289-24707_1	type IA	8_1_Jan_SF_Bin54	d__Bacteria;p__Proteobacteria;c__Gammaproteobacteria;o__SZUA-229;f__SZUA-229;g__;s__
8_1_Jan_SF_Bin65_scaffold_468_c1_2858-4276_1	type IA	8_1_Jan_SF_Bin65	d__Bacteria;p__Proteobacteria;c__Gammaproteobacteria;o__SZUA-229;f__SZUA-229;g__;s__
8_1_Jan_SF_Bin98_scaffold_5_c1_92723-94141_1	type IA	8_1_Jan_SF_Bin98	d__Bacteria;p__Proteobacteria;c__Gammaproteobacteria;o__SZUA-229;f__SZUA-229;g__;s__
8_1_July_SF_Bin40_scaffold_5226_c1_4167-5585_1	type IA	8_1_July_SF_Bin40	d__Bacteria;p__Proteobacteria;c__Gammaproteobacteria;o__SZUA-229;f__SZUA-229;g__;s__
8_1_July_SF_Bin54_scaffold_2735_c1_6318-7736_1	type IA	8_1_July_SF_Bin54	d__Bacteria;p__Proteobacteria;c__Gammaproteobacteria;o__SZUA-229;f__SZUA-229;g__;s__
8_1_Oct_SF_Bin73_scaffold_20825_c1_1795-3213_1	type IA	8_1_Oct_SF_Bin73	d__Bacteria;p__Proteobacteria;c__Gammaproteobacteria;o__SZUA-229;f__SZUA-229;g__;s__
13_Jan_SF_Bin13_scaffold_13985_c1_2508-3107_1	type IA	13_Jan_SF_Bin13	d__Bacteria;p__Proteobacteria;c__Gammaproteobacteria;o__SZUA-229;f__SZUA-229;g__SZUA-116;s__
8_1_Jan_SF_Bin56_scaffold_1336_c1_129-1547_1	type IA	8_1_Jan_SF_Bin56	d__Bacteria;p__Proteobacteria;c__Gammaproteobacteria;o__SZUA-229;f__SZUA-229;g__SZUA-116;s__
8_1_July_SF_Bin66_scaffold_1625_c1_10880-12301_1	type IA	8_1_July_SF_Bin66	d__Bacteria;p__Proteobacteria;c__Gammaproteobacteria;o__SZUA-229;f__SZUA-229;g__SZUA-116;s__
8_1_Oct_SF_Bin34_scaffold_2027_c1_10500-11918_1	type IA	8_1_Oct_SF_Bin34	d__Bacteria;p__Proteobacteria;c__Gammaproteobacteria;o__SZUA-229;f__SZUA-229;g__SZUA-116;s__
8_1_Oct_SF_Bin34_scaffold_74667_c1_1735-2166_1	type IA	8_1_Oct_SF_Bin34	d__Bacteria;p__Proteobacteria;c__Gammaproteobacteria;o__SZUA-229;f__SZUA-229;g__SZUA-116;s__
8_1_Oct_SF_Bin95_scaffold_13298_c1_1937-3358_1	type IA	8_1_Oct_SF_Bin95	d__Bacteria;p__Proteobacteria;c__Gammaproteobacteria;o__Thiohalomonadales;f__Thiohalomonadaceae;g__;s__
8_1_Jan_SF_Bin105_scaffold_3810_c1_1-993_1	type IA	8_1_Jan_SF_Bin105	d__Bacteria;p__Proteobacteria;c__Gammaproteobacteria;o__UBA6429;f__UBA6429;g__;s__
8_1_Jan_SF_Bin39_scaffold_1738_c1_7960-9378_1	type IA	8_1_Jan_SF_Bin39	d__Bacteria;p__Proteobacteria;c__Gammaproteobacteria;o__UBA6429;f__UBA6429;g__;s__
8_1_Jan_SF_Bin44_scaffold_10922_c1_251-1663_1	type IA	8_1_Jan_SF_Bin44	d__Bacteria;p__Proteobacteria;c__Gammaproteobacteria;o__UBA6429;f__UBA6429;g__;s__
8_1_Jan_SF_Bin44_scaffold_49632_c1_1237-2118_1	type IA	8_1_Jan_SF_Bin44	d__Bacteria;p__Proteobacteria;c__Gammaproteobacteria;o__UBA6429;f__UBA6429;g__;s__
8_1_Jan_SF_Bin44_scaffold_69225_c1_593-1744_1	type IA	8_1_Jan_SF_Bin44	d__Bacteria;p__Proteobacteria;c__Gammaproteobacteria;o__UBA6429;f__UBA6429;g__;s__
8_1_Jan_SF_Bin63_scaffold_6019_c1_2-913_1	type IA	8_1_Jan_SF_Bin63	d__Bacteria;p__Proteobacteria;c__Gammaproteobacteria;o__UBA6429;f__UBA6429;g__;s__
8_1_Jan_SF_Bin63_scaffold_73208_c1_1048-1689_1	type IA	8_1_Jan_SF_Bin63	d__Bacteria;p__Proteobacteria;c__Gammaproteobacteria;o__UBA6429;f__UBA6429;g__;s__
8_1_Jan_SF_Bin82_scaffold_206_c1_1-315_1	type IA	8_1_Jan_SF_Bin82	d__Bacteria;p__Proteobacteria;c__Gammaproteobacteria;o__UBA6429;f__UBA6429;g__;s__
8_1_Jan_SF_Bin82_scaffold_442_c1_3-1181_1	type IA	8_1_Jan_SF_Bin82	d__Bacteria;p__Proteobacteria;c__Gammaproteobacteria;o__UBA6429;f__UBA6429;g__;s__
8_1_May_SF_Bin12_scaffold_6_c2_108963-110381_1	type IA	8_1_May_SF_Bin12	d__Bacteria;p__Proteobacteria;c__Gammaproteobacteria;o__UBA6429;f__UBA6429;g__;s__
8_1_Oct_SF_Bin111_scaffold_28719_c1_1-1206_1	type IA	8_1_Oct_SF_Bin111	d__Bacteria;p__Proteobacteria;c__Gammaproteobacteria;o__UBA6429;f__UBA6429;g__;s__
8_1_Oct_SF_Bin111_scaffold_3782_c1_11745-12056_1	type IA	8_1_Oct_SF_Bin111	d__Bacteria;p__Proteobacteria;c__Gammaproteobacteria;o__UBA6429;f__UBA6429;g__;s__
8_1_Oct_SF_Bin18_scaffold_47818_c1_1827-2930_1	type IA	8_1_Oct_SF_Bin18	d__Bacteria;p__Proteobacteria;c__Gammaproteobacteria;o__UBA6429;f__UBA6429;g__;s__
8_1_Oct_SF_Bin77_scaffold_35281_c1_1078-2496_1	type IA	8_1_Oct_SF_Bin77	d__Bacteria;p__Proteobacteria;c__Gammaproteobacteria;o__UBA6429;f__UBA6429;g__;s__
13_July_SF_Bin31_scaffold_16327_c1_955-2370_1	type IA	13_July_SF_Bin31	d__Bacteria;p__Proteobacteria;c__Gammaproteobacteria;o__UBA9214;f__UBA9214;g__SZUA-186;s__
13_Oct_SF_Bin20_scaffold_4575_c1_2348-3763_1	type IA	13_Oct_SF_Bin20	d__Bacteria;p__Proteobacteria;c__Gammaproteobacteria;o__UBA9214;f__UBA9214;g__SZUA-186;s__
21_Oct_SF_Bin2_scaffold_5475_c1_979-2394_1	type IA	21_Oct_SF_Bin2	d__Bacteria;p__Proteobacteria;c__Gammaproteobacteria;o__UBA9214;f__UBA9214;g__SZUA-186;s__
24_Jan_SF_Bin14_scaffold_16569_c1_1-891_1	type IA	24_Jan_SF_Bin14	d__Bacteria;p__Proteobacteria;c__Gammaproteobacteria;o__UBA9214;f__UBA9214;g__SZUA-186;s__
24_Jan_SF_Bin14_scaffold_7029_c1_2457-3572_1	type IA	24_Jan_SF_Bin14	d__Bacteria;p__Proteobacteria;c__Gammaproteobacteria;o__UBA9214;f__UBA9214;g__SZUA-186;s__
24_Jan_SF_Bin6_scaffold_17449_c1_1-987_1	type IA	24_Jan_SF_Bin6	d__Bacteria;p__Proteobacteria;c__Gammaproteobacteria;o__UBA9214;f__UBA9214;g__UBA9214;s__
24_July_SF_Bin20_scaffold_3858_c1_1-294_1	type IA	24_July_SF_Bin20	d__Bacteria;p__Proteobacteria;c__Gammaproteobacteria;o__UBA9214;f__UBA9214;g__UBA9214;s__
24_May_SF_Bin18_scaffold_121_c1_23095-24513_1	type IA	24_May_SF_Bin18	d__Bacteria;p__Proteobacteria;c__Gammaproteobacteria;o__UBA9214;f__UBA9214;g__UBA9214;s__
24_May_SF_Bin18_scaffold_68_c1_30563-31978_1	type IA	24_May_SF_Bin18	d__Bacteria;p__Proteobacteria;c__Gammaproteobacteria;o__UBA9214;f__UBA9214;g__UBA9214;s__
24_May_SF_Bin19_scaffold_10200_c1_2-445_1	type IA	24_May_SF_Bin19	d__Bacteria;p__Proteobacteria;c__Gammaproteobacteria;o__UBA9214;f__UBA9214;g__UBA9214;s__
24_Oct_SF_Bin33_scaffold_1687_c1_493-1914_1	type IA	24_Oct_SF_Bin33	d__Bacteria;p__Proteobacteria;c__Gammaproteobacteria;o__UBA9214;f__UBA9214;g__UBA9214;s__
8_1_Jan_SF_Bin53_scaffold_13371_c1_951-2366_1	type IA	8_1_Jan_SF_Bin53	d__Bacteria;p__Proteobacteria;c__Gammaproteobacteria;o__UBA9214;f__UBA9214;g__UBA9214;s__
8_1_July_SF_Bin11_scaffold_6131_c1_3193-4608_1	type IA	8_1_July_SF_Bin11	d__Bacteria;p__Proteobacteria;c__Gammaproteobacteria;o__UBA9214;f__UBA9214;g__UBA9214;s__
24_Oct_SF_Bin43_scaffold_20708_c1_535-1950_1	type IA	24_Oct_SF_Bin43	d__Bacteria;p__Proteobacteria;c__Gammaproteobacteria;o__XN24;f__XN24;g__;s__
4_1_July_SF_Bin22_scaffold_1_c1_684086-685507_1	type IA	4_1_July_SF_Bin22	d__Bacteria;p__SAR324;c__SAR324;o__SAR324;f__;g__;s__
4_1_July_SF_Bin46_scaffold_2182_c1_11972-13102_1	type IA	4_1_July_SF_Bin46	d__Bacteria;p__SAR324;c__SAR324;o__SAR324;f__;g__;s__
4_1_July_SF_Bin48_scaffold_8842_c1_2048-3472_1	type IA	4_1_July_SF_Bin48	d__Bacteria;p__SAR324;c__SAR324;o__SAR324;f__;g__;s__
8_1_Oct_SF_Bin1_scaffold_8113_c1_7470-8339_1	type IA	8_1_Oct_SF_Bin1	d__Bacteria;p__Spirochaetota;c__Leptospirae;o__Leptospirales;f__Leptonemataceae;g__;s__
4_1_Jan_SF_Bin64_scaffold_4240_c1_3506-4987_1	type IC	4_1_Jan_SF_Bin64	d__Bacteria;p__Proteobacteria;c__Gammaproteobacteria;o__Burkholderiales;f__Burkholderiaceae;g__;s__
4_1_Oct_SF_Bin51_scaffold_9150_c1_900-2381_1	type IC	4_1_Oct_SF_Bin51	d__Bacteria;p__Proteobacteria;c__Gammaproteobacteria;o__Burkholderiales;f__Burkholderiaceae;g__;s__
4_1_Jan_SF_Bin33_scaffold_10951_c2_2606-3415_1	type IC	4_1_Jan_SF_Bin33	d__Bacteria;p__Proteobacteria;c__Gammaproteobacteria;o__Burkholderiales;f__Burkholderiaceae;g__CADEEN01;s__
4_1_May_SF_Bin30_scaffold_2011_c1_11342-12739_1	type IC	4_1_May_SF_Bin30	d__Bacteria;p__Proteobacteria;c__Gammaproteobacteria;o__Burkholderiales;f__Burkholderiaceae;g__CADEEN01;s__
4_1_Oct_SF_Bin28_scaffold_2457_c1_8498-9934_1	type IC	4_1_Oct_SF_Bin28	d__Bacteria;p__Proteobacteria;c__Gammaproteobacteria;o__Burkholderiales;f__Burkholderiaceae;g__CADEEN01;s__
4_1_Jan_SF_Bin8_scaffold_21969_c1_1235-2719_1	type IC	4_1_Jan_SF_Bin8	d__Bacteria;p__Proteobacteria;c__Gammaproteobacteria;o__Burkholderiales;f__Casimicrobiaceae;g__VBCG01;s__
4_1_Oct_SF_Bin16_scaffold_108_c1_3166-4650_1	type IC	4_1_Oct_SF_Bin16	d__Bacteria;p__Proteobacteria;c__Gammaproteobacteria;o__Burkholderiales;f__Casimicrobiaceae;g__VBCG01;s__
4_1_July_SF_Bin28_scaffold_1227_c1_15719-17176_1	type IC	4_1_July_SF_Bin28	d__Bacteria;p__Proteobacteria;c__Gammaproteobacteria;o__Burkholderiales;f__SG8-39;g__SG8-39;s__
4_1_Jan_SF_Bin60_scaffold_3526_c1_6635-8116_1	type IC	4_1_Jan_SF_Bin60	d__Bacteria;p__Proteobacteria;c__Gammaproteobacteria;o__Steroidobacterales;f__Steroidobacteraceae;g__RPQJ01;s__
4_1_May_SF_Bin67_scaffold_39607_c1_2-961_1	type IC	4_1_May_SF_Bin67	d__Bacteria;p__Proteobacteria;c__Gammaproteobacteria;o__Steroidobacterales;f__Steroidobacteraceae;g__RPQJ01;s__
4_1_Oct_SF_Bin42_scaffold_10063_c1_2-172_1	type IC	4_1_Oct_SF_Bin42	d__Bacteria;p__Proteobacteria;c__Gammaproteobacteria;o__Steroidobacterales;f__Steroidobacteraceae;g__RPQJ01;s__
4_1_Oct_SF_Bin42_scaffold_9000_c1_1-639_1	type IC	4_1_Oct_SF_Bin42	d__Bacteria;p__Proteobacteria;c__Gammaproteobacteria;o__Steroidobacterales;f__Steroidobacteraceae;g__RPQJ01;s__
4_1_May_SF_Bin35_scaffold_28583_c1_931-2412_1	type IC	4_1_May_SF_Bin35	d__Bacteria;p__Proteobacteria;c__Gammaproteobacteria;o__Woeseiales;f__Woeseiaceae;g__;s__
8_1_May_SF_Bin13_scaffold_149163_c1_63-1535_1	type ID	8_1_May_SF_Bin13	d__Archaea;p__Asgardarchaeota;c__Heimdallarchaeia;o__UBA460;f__Kariarchaeaceae;g__;s__
4_1_Jan_SF_Bin57_scaffold_6935_c1_1907-3391_1	type ID	4_1_Jan_SF_Bin57	d__Bacteria;p__Chloroflexota;c__Limnocylindria;o__Limnocylindrales;f__CSP1-4;g__SPCO01;s__
4_1_Oct_SF_Bin45_scaffold_5380_c1_2387-3871_1	type ID	4_1_Oct_SF_Bin45	d__Bacteria;p__Chloroflexota;c__Limnocylindria;o__Limnocylindrales;f__CSP1-4;g__SPCO01;s__
21_Jan_SF_Bin24_scaffold_20107_c1_2-1198_1	type ID	21_Jan_SF_Bin24	d__Bacteria;p__Proteobacteria;c__Alphaproteobacteria;o__Geminicoccales;f__Geminicoccaceae;g__CADEGR01;s__
21_Jan_SF_Bin24_scaffold_77750_c1_1851-2237_1	type ID	21_Jan_SF_Bin24	d__Bacteria;p__Proteobacteria;c__Alphaproteobacteria;o__Geminicoccales;f__Geminicoccaceae;g__CADEGR01;s__
13_May_SF_Bin88_scaffold_48226_c1_1257-2570_1	type ID	13_May_SF_Bin88	d__Bacteria;p__Proteobacteria;c__Gammaproteobacteria;o__Acidiferrobacterales;f__Sulfurifustaceae;g__Sulfuricaulis;s__
8_1_July_SF_Bin13_scaffold_14118_c1_1867-3354_1	type ID	8_1_July_SF_Bin13	d__Bacteria;p__Proteobacteria;c__Gammaproteobacteria;o__Acidiferrobacterales;f__Sulfurifustaceae;g__Sulfuricaulis;s__
21_Jan_SF_Bin54_scaffold_2806_c1_13578-14687_1	type ID	21_Jan_SF_Bin54	d__Bacteria;p__Proteobacteria;c__Gammaproteobacteria;o__Arenicellales;f__RKSH01;g__;s__
21_Jan_SF_Bin54_scaffold_9318_c1_7004-7510_1	type ID	21_Jan_SF_Bin54	d__Bacteria;p__Proteobacteria;c__Gammaproteobacteria;o__Arenicellales;f__RKSH01;g__;s__
4_1_Jan_SF_Bin40_scaffold_1642_c1_1-285_1	type ID	4_1_Jan_SF_Bin40	d__Bacteria;p__Proteobacteria;c__Gammaproteobacteria;o__Burkholderiales;f__SG8-39;g__JAABQT01;s__
4_1_Jan_SF_Bin54_scaffold_14345_c1_492-1958_1	type ID	4_1_Jan_SF_Bin54	d__Bacteria;p__Proteobacteria;c__Gammaproteobacteria;o__Burkholderiales;f__SG8-39;g__JAABQT01;s__
4_1_May_SF_Bin49_scaffold_528_c1_23910-25376_1	type ID	4_1_May_SF_Bin49	d__Bacteria;p__Proteobacteria;c__Gammaproteobacteria;o__Burkholderiales;f__SG8-39;g__JAABQT01;s__
4_1_May_SF_Bin65_scaffold_145_c1_1-534_1	type ID	4_1_May_SF_Bin65	d__Bacteria;p__Proteobacteria;c__Gammaproteobacteria;o__Burkholderiales;f__SG8-39;g__JAABQT01;s__
4_1_May_SF_Bin65_scaffold_21722_c1_2272-3273_1	type ID	4_1_May_SF_Bin65	d__Bacteria;p__Proteobacteria;c__Gammaproteobacteria;o__Burkholderiales;f__SG8-39;g__JAABQT01;s__
4_1_Oct_SF_Bin27_scaffold_239_c1_18184-19650_1	type ID	4_1_Oct_SF_Bin27	d__Bacteria;p__Proteobacteria;c__Gammaproteobacteria;o__Burkholderiales;f__SG8-39;g__JAABQT01;s__
4_1_Oct_SF_Bin8_scaffold_18496_c1_2569-3024_1	type ID	4_1_Oct_SF_Bin8	d__Bacteria;p__Proteobacteria;c__Gammaproteobacteria;o__Burkholderiales;f__SG8-39;g__JAABQT01;s__
8_1_Jan_SF_Bin1_scaffold_8140_c1_1832-3307_1	type ID	8_1_Jan_SF_Bin1	d__Bacteria;p__Proteobacteria;c__Gammaproteobacteria;o__S140-43;f__S140-43;g__;s__
8_1_Jan_SF_Bin23_scaffold_54_c1_46016-47494_1	type ID	8_1_Jan_SF_Bin23	d__Bacteria;p__Proteobacteria;c__Gammaproteobacteria;o__SZUA-152;f__SZUA-152;g__;s__
8_1_Oct_SF_Bin98_scaffold_63_c1_73347-74825_1	type ID	8_1_Oct_SF_Bin98	d__Bacteria;p__Proteobacteria;c__Gammaproteobacteria;o__SZUA-152;f__SZUA-152;g__;s__
8_1_Oct_SF_Bin92_scaffold_24372_c1_1357-2745_1	type II	8_1_Oct_SF_Bin92	d__Bacteria;p__Proteobacteria;c__Alphaproteobacteria;o__Rhodobacterales;f__Rhodobacteraceae;g__S012-89;s__
8_1_Oct_SF_Bin68_scaffold_79680_c1_11-1396_1	type II	8_1_Oct_SF_Bin68	d__Bacteria;p__Proteobacteria;c__Alphaproteobacteria;o__Rhodospirillales;f__2-02-FULL-58-16;g__;s__
13_Jan_SF_Bin10_scaffold_5509_c1_2-802_1	type II	13_Jan_SF_Bin10	d__Bacteria;p__Proteobacteria;c__Alphaproteobacteria;o__Rhodospirillales;f__Magnetovibrionaceae;g__;s__
8_1_Jan_SF_Bin18_scaffold_13202_c1_1137-2522_1	type II	8_1_Jan_SF_Bin18	d__Bacteria;p__Proteobacteria;c__Alphaproteobacteria;o__Rhodospirillales;f__Magnetovibrionaceae;g__;s__
8_1_Jan_SF_Bin75_scaffold_6624_c1_1044-2429_1	type II	8_1_Jan_SF_Bin75	d__Bacteria;p__Proteobacteria;c__Gammaproteobacteria;o__AKS1;f__AKS1;g__;s__
4_1_July_SF_Bin49_scaffold_21632_c1_3-1169_1	type II	4_1_July_SF_Bin49	d__Bacteria;p__Proteobacteria;c__Gammaproteobacteria;o__Burkholderiales;f__Gallionellaceae;g__Gallionella;s__
4_1_July_SF_Bin6_scaffold_34765_c1_2-733_1	type II	4_1_July_SF_Bin6	d__Bacteria;p__Proteobacteria;c__Gammaproteobacteria;o__Burkholderiales;f__Gallionellaceae;g__Gallionella;s__
4_1_May_SF_Bin13_scaffold_39269_c1_3-851_1	type II	4_1_May_SF_Bin13	d__Bacteria;p__Proteobacteria;c__Gammaproteobacteria;o__Burkholderiales;f__Gallionellaceae;g__Gallionella;s__
4_1_May_SF_Bin26_scaffold_8902_c1_3-1163_1	type II	4_1_May_SF_Bin26	d__Bacteria;p__Proteobacteria;c__Gammaproteobacteria;o__Burkholderiales;f__Gallionellaceae;g__VIKH01;s__
8_1_Jan_SF_Bin3_1_scaffold_10006_c1_3-212_1	type II	8_1_Jan_SF_Bin3_1	d__Bacteria;p__Proteobacteria;c__Gammaproteobacteria;o__JABURT01;f__JABURT01;g__JABURT01;s__
8_1_Jan_SF_Bin3_1_scaffold_17872_c1_749-2128_1	type II	8_1_Jan_SF_Bin3_1	d__Bacteria;p__Proteobacteria;c__Gammaproteobacteria;o__JABURT01;f__JABURT01;g__JABURT01;s__
4_1_May_SF_Bin75_scaffold_20_c1_88036-89415_1	type II	4_1_May_SF_Bin75	d__Bacteria;p__Proteobacteria;c__Gammaproteobacteria;o__S140-43;f__S140-43;g__;s__
8_1_Jan_SF_Bin100_scaffold_8249_c1_2942-4321_1	type II	8_1_Jan_SF_Bin100	d__Bacteria;p__Proteobacteria;c__Gammaproteobacteria;o__S140-43;f__S140-43;g__;s__
8_1_Jan_SF_Bin103_scaffold_1520_c1_14455-15834_1	type II	8_1_Jan_SF_Bin103	d__Bacteria;p__Proteobacteria;c__Gammaproteobacteria;o__S140-43;f__S140-43;g__;s__
8_1_Oct_SF_Bin3_scaffold_693_c1_6865-8244_1	type II	8_1_Oct_SF_Bin3	d__Bacteria;p__Proteobacteria;c__Gammaproteobacteria;o__S140-43;f__S140-43;g__;s__
8_1_Jan_SF_Bin54_scaffold_370_c1_3724-5112_1	type II	8_1_Jan_SF_Bin54	d__Bacteria;p__Proteobacteria;c__Gammaproteobacteria;o__SZUA-229;f__SZUA-229;g__;s__
8_1_Jan_SF_Bin65_scaffold_366_c1_40370-41029_1	type II	8_1_Jan_SF_Bin65	d__Bacteria;p__Proteobacteria;c__Gammaproteobacteria;o__SZUA-229;f__SZUA-229;g__;s__
13_Jan_SF_Bin13_scaffold_10006_c1_597-1985_1	type II	13_Jan_SF_Bin13	d__Bacteria;p__Proteobacteria;c__Gammaproteobacteria;o__SZUA-229;f__SZUA-229;g__SZUA-116;s__
8_1_Jan_SF_Bin56_scaffold_81_c1_53972-55360_1	type II	8_1_Jan_SF_Bin56	d__Bacteria;p__Proteobacteria;c__Gammaproteobacteria;o__SZUA-229;f__SZUA-229;g__SZUA-116;s__
8_1_July_SF_Bin66_scaffold_15_c1_165044-166273_1	type II	8_1_July_SF_Bin66	d__Bacteria;p__Proteobacteria;c__Gammaproteobacteria;o__SZUA-229;f__SZUA-229;g__SZUA-116;s__
8_1_July_SF_Bin66_scaffold_16762_c1_3359-3643_1	type II	8_1_July_SF_Bin66	d__Bacteria;p__Proteobacteria;c__Gammaproteobacteria;o__SZUA-229;f__SZUA-229;g__SZUA-116;s__
8_1_Oct_SF_Bin34_scaffold_2027_c1_4197-5585_1	type II	8_1_Oct_SF_Bin34	d__Bacteria;p__Proteobacteria;c__Gammaproteobacteria;o__SZUA-229;f__SZUA-229;g__SZUA-116;s__
13_Jan_SF_Bin42_scaffold_7772_c1_203-1582_1	type II	13_Jan_SF_Bin42	d__Bacteria;p__Proteobacteria;c__Gammaproteobacteria;o__Thiohalomonadales;f__Thiohalomonadaceae;g__;s__
8_1_Oct_SF_Bin95_scaffold_3820_c1_1-1140_1	type II	8_1_Oct_SF_Bin95	d__Bacteria;p__Proteobacteria;c__Gammaproteobacteria;o__Thiohalomonadales;f__Thiohalomonadaceae;g__;s__
8_1_July_SF_Bin57_scaffold_12756_c1_2412-3800_1	type II	8_1_July_SF_Bin57	d__Bacteria;p__Proteobacteria;c__Gammaproteobacteria;o__UBA6429;f__UBA6429;g__;s__
8_1_July_SF_Bin57_scaffold_1967_c1_6938-8326_1	type II	8_1_July_SF_Bin57	d__Bacteria;p__Proteobacteria;c__Gammaproteobacteria;o__UBA6429;f__UBA6429;g__;s__
13_May_SF_Bin22_scaffold_1308_c1_10667-12055_1	type II	13_May_SF_Bin22	d__Bacteria;p__Proteobacteria;c__Gammaproteobacteria;o__Woeseiales;f__Woeseiaceae;g__JAACFB01;s__
24_Oct_SF_Bin22_scaffold_30003_c1_702-2090_1	type II	24_Oct_SF_Bin22	d__Bacteria;p__Proteobacteria;c__Gammaproteobacteria;o__Woeseiales;f__Woeseiaceae;g__JAACFE01;s__JAACFE01 sp009937505
21_Jan_SF_Bin41_scaffold_866_c1_15063-16454_1	type II	21_Jan_SF_Bin41	d__Bacteria;p__Proteobacteria;c__Gammaproteobacteria;o__Woeseiales;f__Woeseiaceae;g__UBA1847;s__
21_Oct_SF_Bin13_scaffold_7594_c1_2881-3099_1	type II	21_Oct_SF_Bin13	d__Bacteria;p__Proteobacteria;c__Gammaproteobacteria;o__Woeseiales;f__Woeseiaceae;g__UBA1847;s__
24_Oct_SF_Bin30_scaffold_4889_c1_2-652_1	type II	24_Oct_SF_Bin30	d__Bacteria;p__Proteobacteria;c__Gammaproteobacteria;o__Woeseiales;f__Woeseiaceae;g__UBA1847;s__
8_1_Jan_SF_Bin85_scaffold_7612_c1_3-1361_1	type II	8_1_Jan_SF_Bin85	d__Bacteria;p__Proteobacteria;c__Gammaproteobacteria;o__Woeseiales;f__Woeseiaceae;g__UBA1847;s__
8_1_July_SF_Bin69_scaffold_7445_c1_5411-5827_1	type II	8_1_July_SF_Bin69	d__Bacteria;p__Proteobacteria;c__Gammaproteobacteria;o__Woeseiales;f__Woeseiaceae;g__UBA1847;s__
21_May_SF_Bin5_scaffold_4580_c1_758-2137_1	type II	21_May_SF_Bin5	d__Bacteria;p__Proteobacteria;c__Gammaproteobacteria;o__Xanthomonadales;f__SZUA-36;g__JABDPF01;s__
24_July_SF_Bin2_scaffold_698_c1_5799-7178_1	type II	24_July_SF_Bin2	d__Bacteria;p__Proteobacteria;c__Gammaproteobacteria;o__Xanthomonadales;f__SZUA-36;g__JABDPF01;s__
24_May_SF_Bin1_scaffold_5613_c1_3-1364_1	type II	24_May_SF_Bin1	d__Bacteria;p__Proteobacteria;c__Gammaproteobacteria;o__Xanthomonadales;f__SZUA-36;g__JABDPF01;s__
24_Oct_SF_Bin28_scaffold_277_c1_3091-4470_1	type II	24_Oct_SF_Bin28	d__Bacteria;p__Proteobacteria;c__Gammaproteobacteria;o__Xanthomonadales;f__SZUA-36;g__JABDPF01;s__
24_Oct_SF_Bin7_scaffold_8123_c1_3-524_1	type II	24_Oct_SF_Bin7	d__Bacteria;p__Proteobacteria;c__Gammaproteobacteria;o__Xanthomonadales;f__SZUA-36;g__SZUA-36;s__
4_1_July_SF_Bin22_scaffold_2_c1_482072-483457_1	type II	4_1_July_SF_Bin22	d__Bacteria;p__SAR324;c__SAR324;o__SAR324;f__;g__;s__
8_1_Jan_SF_Bin79_scaffold_464_c1_20721-22010_1	type III	8_1_Jan_SF_Bin79	d__Archaea;p__Hadarchaeota;c__Hadarchaeia;o__Hadarchaeales;f__Hadarchaeaceae;g__DG-33;s__
8_1_Oct_SF_Bin37_scaffold_782_c1_12989-14278_1	type III	8_1_Oct_SF_Bin37	d__Archaea;p__Hadarchaeota;c__Hadarchaeia;o__Hadarchaeales;f__Hadarchaeaceae;g__DG-33;s__
13_Jan_SF_Bin36_scaffold_1039_c1_2198-3472_1	type III	13_Jan_SF_Bin36	d__Archaea;p__Nanoarchaeota;c__Nanoarchaeia;o__Pacearchaeales;f__GW2011-AR1;g__JAGVXH01;s__
8_1_Jan_SF_Bin48_scaffold_344_c1_3285-4514_1	type III	8_1_Jan_SF_Bin48	d__Archaea;p__Thermoproteota;c__Bathyarchaeia;o__B26-1;f__BA1;g__;s__
8_1_Jan_SF_Bin74_scaffold_1347_c1_2663-3892_1	type III	8_1_Jan_SF_Bin74	d__Archaea;p__Thermoproteota;c__Bathyarchaeia;o__B26-1;f__BA1;g__;s__
8_1_Oct_SF_Bin29_scaffold_269_c1_4414-5643_1	type III	8_1_Oct_SF_Bin29	d__Archaea;p__Thermoproteota;c__Bathyarchaeia;o__B26-1;f__BA1;g__;s__
8_1_Jan_SF_Bin55_scaffold_11316_c1_2313-3551_1	type III	8_1_Jan_SF_Bin55	d__Archaea;p__Thermoproteota;c__Bathyarchaeia;o__B26-1;f__BA1;g__Kmv02;s__
8_1_May_SF_Bin8_scaffold_94476_c1_2909-3250_1	type III	8_1_May_SF_Bin8	d__Archaea;p__Thermoproteota;c__Bathyarchaeia;o__B26-1;f__BA1;g__Kmv02;s__
8_1_Oct_SF_Bin53_scaffold_8301_c1_5558-6796_1	type III	8_1_Oct_SF_Bin53	d__Archaea;p__Thermoproteota;c__Bathyarchaeia;o__B26-1;f__BA1;g__Kmv02;s__
8_1_Jan_SF_Bin101_scaffold_17421_c1_2939-3955_1	type III	8_1_Jan_SF_Bin101	d__Archaea;p__Thermoproteota;c__Bathyarchaeia;o__B26-1;f__BA1;g__SOJZ01;s__
8_1_Oct_SF_Bin103_scaffold_19428_c1_1680-2897_1	type III	8_1_Oct_SF_Bin103	d__Archaea;p__Thermoproteota;c__Bathyarchaeia;o__B26-1;f__BA1;g__SOJZ01;s__
8_1_Jan_SF_Bin46_scaffold_192_c1_19429-20649_1	type III	8_1_Jan_SF_Bin46	d__Archaea;p__Thermoproteota;c__Bathyarchaeia;o__B26-1;f__SOJC01;g__;s__
8_1_Oct_SF_Bin100_scaffold_27226_c1_1730-2962_1	type III	8_1_Oct_SF_Bin100	d__Archaea;p__Thermoproteota;c__Bathyarchaeia;o__B26-1;f__SOJC01;g__;s__
8_1_Jan_SF_Bin32_scaffold_1091_c1_6999-8228_1	type III	8_1_Jan_SF_Bin32	d__Archaea;p__Thermoproteota;c__Bathyarchaeia;o__B26-1;f__UBA233;g__;s__
8_1_Oct_SF_Bin62_scaffold_1864_c1_10982-12211_1	type III	8_1_Oct_SF_Bin62	d__Archaea;p__Thermoproteota;c__Bathyarchaeia;o__B26-1;f__UBA233;g__;s__
8_1_Oct_SF_Bin85_scaffold_25211_c1_1-372_1	type III	8_1_Oct_SF_Bin85	d__Archaea;p__Thermoproteota;c__Bathyarchaeia;o__B26-1;f__UBA233;g__;s__
8_1_Oct_SF_Bin85_scaffold_35483_c1_1494-2723_1	type III	8_1_Oct_SF_Bin85	d__Archaea;p__Thermoproteota;c__Bathyarchaeia;o__B26-1;f__UBA233;g__;s__
8_1_Jan_SF_Bin12_scaffold_26699_c1_1-384_1	type III	8_1_Jan_SF_Bin12	d__Archaea;p__Thermoproteota;c__Bathyarchaeia;o__TCS64;f__TCS64;g__;s__
8_1_Oct_SF_Bin84_scaffold_22226_c1_3392-4618_1	type III	8_1_Oct_SF_Bin84	d__Archaea;p__Thermoproteota;c__Bathyarchaeia;o__TCS64;f__TCS64;g__;s__
8_1_Jan_SF_Bin36_scaffold_76724_c1_3-557_1	type III	8_1_Jan_SF_Bin36	d__Archaea;p__Thermoproteota;c__Nitrososphaeria_A;o__Caldarchaeales;f__;g__;s__
8_1_Oct_SF_Bin33_scaffold_27442_c1_974-2266_1	type III	8_1_Oct_SF_Bin33	d__Archaea;p__Thermoproteota;c__Nitrososphaeria_A;o__Caldarchaeales;f__;g__;s__
4_1_July_SF_Bin26_scaffold_21104_c1_1-531_1	type III	4_1_July_SF_Bin26	d__Archaea;p__Thermoplasmatota;c__Thermoplasmata;o__UBA10834;f__DTMW01;g__DTMW01;s__
8_1_Jan_SF_Bin58_scaffold_3176_c1_2152-3441_1	type III	8_1_Jan_SF_Bin58	d__Archaea;p__Asgardarchaeota;c__Heimdallarchaeia;o__UBA460;f__Kariarchaeaceae;g__LC-2;s__
8_1_May_SF_Bin13_scaffold_1168_c1_764-2053_1	type III	8_1_May_SF_Bin13	d__Archaea;p__Asgardarchaeota;c__Heimdallarchaeia;o__UBA460;f__Kariarchaeaceae;g__;s__
8_1_Oct_SF_Bin87_scaffold_64852_c1_1356-2387_1	type III	8_1_Oct_SF_Bin87	d__Archaea;p__Thermoproteota;c__Bathyarchaeia;o__B26-1;f__B26-1;g__PIYB01;s__
13_May_SF_Bin61_scaffold_6885_c1_6703-7809_1	type IV	13_May_SF_Bin61	d__Bacteria;p__Acidobacteriota;c__Mor1;o__J045;f__J045;g__;s__
21_Jan_SF_Bin44_scaffold_13_c1_66006-67097_1	type IV	21_Jan_SF_Bin44	d__Bacteria;p__Acidobacteriota;c__Mor1;o__Mor1;f__Mor1;g__;s__
21_May_SF_Bin2_scaffold_830_c1_1189-2280_1	type IV	21_May_SF_Bin2	d__Bacteria;p__Acidobacteriota;c__Mor1;o__Mor1;f__Mor1;g__;s__
13_July_SF_Bin37_scaffold_4234_c1_5029-6141_1	type IV	13_July_SF_Bin37	d__Bacteria;p__Acidobacteriota;c__Thermoanaerobaculia;o__UBA5704;f__UBA5704;g__;s__
13_May_SF_Bin86_scaffold_332_c1_45946-47058_1	type IV	13_May_SF_Bin86	d__Bacteria;p__Acidobacteriota;c__Thermoanaerobaculia;o__UBA5704;f__UBA5704;g__;s__
4_1_Jan_SF_Bin58_scaffold_3639_c1_3384-4499_1	type IV	4_1_Jan_SF_Bin58	d__Bacteria;p__Actinobacteriota;c__Acidimicrobiia;o__Acidimicrobiales;f__CAIXPF01;g__WHTX01;s__
4_1_May_SF_Bin50_scaffold_17060_c1_1890-3032_1	type IV	4_1_May_SF_Bin50	d__Bacteria;p__Actinobacteriota;c__Acidimicrobiia;o__Acidimicrobiales;f__SZUA-35;g__CADEDH01;s__
4_1_Oct_SF_Bin2_scaffold_10468_c1_2648-3790_1	type IV	4_1_Oct_SF_Bin2	d__Bacteria;p__Actinobacteriota;c__Acidimicrobiia;o__Acidimicrobiales;f__SZUA-35;g__CADEDH01;s__
21_Jan_SF_Bin5_scaffold_50428_c1_2-1150_1	type IV	21_Jan_SF_Bin5	d__Bacteria;p__Chloroflexota;c__Anaerolineae;o__4572-78;f__J111;g__J095;s__
24_Jan_SF_Bin12_scaffold_9274_c1_2383-3141_1	type IV	24_Jan_SF_Bin12	d__Bacteria;p__Desulfobacterota;c__Desulfobacteria;o__Desulfobacterales;f__;g__;s__
13_Jan_SF_Bin53_scaffold_5312_c1_4386-5045_1	type IV	13_Jan_SF_Bin53	d__Bacteria;p__Gemmatimonadota;c__Gemmatimonadetes;o__Gemmatimonadales;f__GWC2-71-9;g__WVYX01;s__
13_Jan_SF_Bin53_scaffold_977_c1_11139-11408_1	type IV	13_Jan_SF_Bin53	d__Bacteria;p__Gemmatimonadota;c__Gemmatimonadetes;o__Gemmatimonadales;f__GWC2-71-9;g__WVYX01;s__
13_July_SF_Bin32_scaffold_49_c1_94897-96006_1	type IV	13_July_SF_Bin32	d__Bacteria;p__Gemmatimonadota;c__Gemmatimonadetes;o__Gemmatimonadales;f__GWC2-71-9;g__WVYX01;s__
13_May_SF_Bin58_scaffold_76_c1_8393-9502_1	type IV	13_May_SF_Bin58	d__Bacteria;p__Gemmatimonadota;c__Gemmatimonadetes;o__Gemmatimonadales;f__GWC2-71-9;g__WVYX01;s__
13_May_SF_Bin79_scaffold_12496_c1_2862-3989_1	type IV	13_May_SF_Bin79	d__Bacteria;p__Gemmatimonadota;c__Gemmatimonadetes;o__Gemmatimonadales;f__GWC2-71-9;g__WVYX01;s__
13_Oct_SF_Bin3_scaffold_2867_c1_1718-2827_1	type IV	13_Oct_SF_Bin3	d__Bacteria;p__Gemmatimonadota;c__Gemmatimonadetes;o__Gemmatimonadales;f__GWC2-71-9;g__WVYX01;s__
8_1_July_SF_Bin36_scaffold_1610_c1_4712-5821_1	type IV	8_1_July_SF_Bin36	d__Bacteria;p__Gemmatimonadota;c__Gemmatimonadetes;o__Gemmatimonadales;f__GWC2-71-9;g__WVYX01;s__
13_May_SF_Bin90_scaffold_19521_c1_3-329_1	type IV	13_May_SF_Bin90	d__Bacteria;p__Myxococcota_A;c__UBA9160;o__UBA9160;f__SMWR01;g__;s__
13_May_SF_Bin90_scaffold_2100_c1_17819-18625_1	type IV	13_May_SF_Bin90	d__Bacteria;p__Myxococcota_A;c__UBA9160;o__UBA9160;f__SMWR01;g__;s__
4_1_Oct_SF_Bin12_scaffold_19353_c1_1636-2763_1	type IV	4_1_Oct_SF_Bin12	d__Bacteria;p__Myxococcota_A;c__UBA9160;o__UBA9160;f__SMWR01;g__;s__
8_1_July_SF_Bin58_scaffold_172_c1_41700-42827_1	type IV	8_1_July_SF_Bin58	d__Bacteria;p__Myxococcota_A;c__UBA9160;o__UBA9160;f__SMWR01;g__;s__
4_1_Jan_SF_Bin53_scaffold_3569_c1_3493-4641_1	type IV	4_1_Jan_SF_Bin53	d__Bacteria;p__Nitrospirota;c__Nitrospiria;o__Nitrospirales;f__Nitrospiraceae;g__Nitrospira_F;s__
4_1_May_SF_Bin36_scaffold_4058_c1_4399-5547_1	type IV	4_1_May_SF_Bin36	d__Bacteria;p__Nitrospirota;c__Nitrospiria;o__Nitrospirales;f__Nitrospiraceae;g__Nitrospira_F;s__
4_1_Oct_SF_Bin52_scaffold_2043_c1_5736-6884_1	type IV	4_1_Oct_SF_Bin52	d__Bacteria;p__Nitrospirota;c__Nitrospiria;o__Nitrospirales;f__Nitrospiraceae;g__Nitrospira_F;s__
4_1_July_SF_Bin20_scaffold_213_c1_616-1770_1	type IV	4_1_July_SF_Bin20	d__Bacteria;p__Nitrospirota;c__UBA9217;o__UBA9217;f__UBA9217;g__;s__
21_Jan_SF_Bin2_scaffold_19329_c1_860-1981_1	type IV	21_Jan_SF_Bin2	d__Bacteria;p__Planctomycetota;c__PLA2;o__PLA2;f__PLA2;g__;s__
21_Jan_SF_Bin24_scaffold_15437_c1_4824-5573_1	type IV	21_Jan_SF_Bin24	d__Bacteria;p__Proteobacteria;c__Alphaproteobacteria;o__Geminicoccales;f__Geminicoccaceae;g__CADEGR01;s__
8_1_July_SF_Bin24_scaffold_19748_c1_2382-3299_1	type IV	8_1_July_SF_Bin24	d__Bacteria;p__Proteobacteria;c__Gammaproteobacteria;o__Burkholderiales;f__Burkholderiaceae;g__LMDS01;s__
4_1_Oct_SF_Bin16_scaffold_629_c1_2272-3372_1	type IV	4_1_Oct_SF_Bin16	d__Bacteria;p__Proteobacteria;c__Gammaproteobacteria;o__Burkholderiales;f__Casimicrobiaceae;g__VBCG01;s__
4_1_Oct_SF_Bin40_scaffold_3759_c1_1-567_1	type IV	4_1_Oct_SF_Bin40	d__Bacteria;p__Proteobacteria;c__Gammaproteobacteria;o__Burkholderiales;f__Usitatibacteraceae;g__FEB-7;s__
13_May_SF_Bin75_scaffold_21663_c1_969-2231_1	type IV	13_May_SF_Bin75	d__Bacteria;p__Proteobacteria;c__Gammaproteobacteria;o__Granulosicoccales;f__;g__;s__
13_July_SF_Bin55_scaffold_36036_c1_1-921_1	type IV	13_July_SF_Bin55	d__Bacteria;p__Proteobacteria;c__Gammaproteobacteria;o__HK1;f__HK1;g__;s__
8_1_Oct_SF_Bin24_scaffold_13_c1_179628-180752_1	type IV	8_1_Oct_SF_Bin24	d__Bacteria;p__Spirochaetota;c__Leptospirae;o__Turneriellales;f__J094;g__;s__
8_1_Oct_SF_Bin25_scaffold_5_c1_181510-182625_1	type IV	8_1_Oct_SF_Bin25	d__Bacteria;p__Spirochaetota;c__Leptospirae;o__Turneriellales;f__J094;g__;s__

## Sheet: Sqr
Sqr	Type	MAG	GTDBtk
13_Jan_SF_Bin2_scaffold_20240_c1_1-504_1	Sqr III	13_Jan_SF_Bin2	d__Bacteria;p__Bacteroidota;c__Bacteroidia;o__Flavobacteriales;f__Flavobacteriaceae;g__QNYL01;s__
13_Jan_SF_Bin31_scaffold_3039_c1_378-1370_1	Sqr III	13_Jan_SF_Bin31	d__Bacteria;p__Desulfobacterota;c__Desulfobacteria;o__Desulfobacterales;f__UBA11574;g__JAAXQD01;s__
13_Jan_SF_Bin31_scaffold_30831_c1_134-1417_1	Sqr I	13_Jan_SF_Bin31	d__Bacteria;p__Desulfobacterota;c__Desulfobacteria;o__Desulfobacterales;f__UBA11574;g__JAAXQD01;s__
13_Jan_SF_Bin38_scaffold_20611_c1_2034-2570_1	Sqr I	13_Jan_SF_Bin38	d__Bacteria;p__Desulfobacterota;c__Desulfobacteria;o__Desulfobacterales;f__UBA11574;g__UBA11574;s__UBA11574 sp002868985
13_Jan_SF_Bin38_scaffold_9255_c1_679-1671_1	Sqr III	13_Jan_SF_Bin38	d__Bacteria;p__Desulfobacterota;c__Desulfobacteria;o__Desulfobacterales;f__UBA11574;g__UBA11574;s__UBA11574 sp002868985
13_Jan_SF_Bin14_scaffold_7094_c1_475-1470_1	Sqr III	13_Jan_SF_Bin14	d__Bacteria;p__Desulfobacterota;c__Desulfobulbia;o__Desulfobulbales;f__Desulfobulbaceae;g__;s__
13_Jan_SF_Bin62_scaffold_2836_c1_6438-6911_1	Sqr III	13_Jan_SF_Bin62	d__Bacteria;p__Proteobacteria;c__Gammaproteobacteria;o__Acidiferrobacterales;f__Sulfurifustaceae;g__Sulfuricaulis;s__
13_Jan_SF_Bin42_scaffold_2700_c1_717-1850_1	Sqr VI	13_Jan_SF_Bin42	d__Bacteria;p__Proteobacteria;c__Gammaproteobacteria;o__Thiohalomonadales;f__Thiohalomonadaceae;g__;s__
13_Jan_SF_Bin42_scaffold_9036_c1_399-1670_1	Sqr I	13_Jan_SF_Bin42	d__Bacteria;p__Proteobacteria;c__Gammaproteobacteria;o__Thiohalomonadales;f__Thiohalomonadaceae;g__;s__
13_July_SF_Bin43_scaffold_4181_c1_5580-6824_1	Sqr III	13_July_SF_Bin43	d__Bacteria;p__Actinobacteriota;c__Acidimicrobiia;o__UBA5794;f__UBA4744;g__UBA4744;s__
13_July_SF_Bin34_scaffold_14289_c1_1621-2340_1	Sqr III	13_July_SF_Bin34	d__Bacteria;p__Actinobacteriota;c__Acidimicrobiia;o__UBA5794;f__ZC4RG35;g__MA-ANB-1;s__
13_July_SF_Bin18_scaffold_27683_c1_499-1632_1	Sqr III	13_July_SF_Bin18	d__Bacteria;p__Proteobacteria;c__Gammaproteobacteria;o__Woeseiales;f__Woeseiaceae;g__JAACFB01;s__
13_July_SF_Bin49_scaffold_13077_c1_2754-3950_1	Sqr II	13_July_SF_Bin49	d__Bacteria;p__Proteobacteria;c__Gammaproteobacteria;o__Woeseiales;f__Woeseiaceae;g__JAACFB01;s__
13_May_SF_Bin12_scaffold_9094_c1_5726-7006_1	Sqr III	13_May_SF_Bin12	d__Bacteria;p__Acidobacteriota;c__Thermoanaerobaculia;o__UBA5704;f__UBA5704;g__;s__
13_May_SF_Bin57_scaffold_1424_c1_180-1379_1	Sqr II	13_May_SF_Bin57	d__Bacteria;p__Actinobacteriota;c__Acidimicrobiia;o__Acidimicrobiales;f__SZUA-35;g__CADEDH01;s__
13_May_SF_Bin62_scaffold_21202_c1_1254-2453_1	Sqr II	13_May_SF_Bin62	d__Bacteria;p__Actinobacteriota;c__Acidimicrobiia;o__Acidimicrobiales;f__SZUA-35;g__CADEDH01;s__
13_May_SF_Bin73_scaffold_36633_c1_1892-3064_1	Sqr III	13_May_SF_Bin73	d__Bacteria;p__Actinobacteriota;c__Acidimicrobiia;o__UBA5794;f__;g__;s__
13_May_SF_Bin59_scaffold_17680_c1_3-797_1	Sqr III	13_May_SF_Bin59	d__Bacteria;p__Actinobacteriota;c__Acidimicrobiia;o__UBA5794;f__JAENVV01;g__;s__
13_May_SF_Bin59_scaffold_18846_c1_3788-4717_1	Sqr III	13_May_SF_Bin59	d__Bacteria;p__Actinobacteriota;c__Acidimicrobiia;o__UBA5794;f__JAENVV01;g__;s__
13_May_SF_Bin24_scaffold_46436_c1_1-390_1	Sqr III	13_May_SF_Bin24	d__Bacteria;p__Actinobacteriota;c__Acidimicrobiia;o__UBA5794;f__JAENVV01;g__JAENVV01;s__
13_May_SF_Bin97_scaffold_2385_c1_13396-14637_1	Sqr III	13_May_SF_Bin97	d__Bacteria;p__Actinobacteriota;c__Acidimicrobiia;o__UBA5794;f__SHLN01;g__SHLN01;s__
13_May_SF_Bin27_scaffold_751_c1_17965-19209_1	Sqr III	13_May_SF_Bin27	d__Bacteria;p__Actinobacteriota;c__Acidimicrobiia;o__UBA5794;f__UBA4744;g__UBA4744;s__
13_May_SF_Bin27_scaffold_751_c1_20604-21743_1	Sqr III	13_May_SF_Bin27	d__Bacteria;p__Actinobacteriota;c__Acidimicrobiia;o__UBA5794;f__UBA4744;g__UBA4744;s__
13_May_SF_Bin46_scaffold_50983_c1_243-1487_1	Sqr III	13_May_SF_Bin46	d__Bacteria;p__Actinobacteriota;c__Acidimicrobiia;o__UBA5794;f__ZC4RG35;g__;s__
13_May_SF_Bin37_scaffold_61319_c1_484-1203_1	Sqr III	13_May_SF_Bin37	d__Bacteria;p__Actinobacteriota;c__Acidimicrobiia;o__UBA5794;f__ZC4RG35;g__MA-ANB-1;s__
13_May_SF_Bin4_scaffold_43480_c1_1-1116_1	Sqr II	13_May_SF_Bin4	d__Bacteria;p__Bacteroidota;c__Bacteroidia;o__Chitinophagales;f__Saprospiraceae;g__;s__
13_May_SF_Bin21_scaffold_51777_c1_455-1639_1	Sqr III	13_May_SF_Bin21	d__Bacteria;p__Bacteroidota;c__Ignavibacteria;o__Ignavibacteriales;f__Ignavibacteriaceae;g__IGN2;s__
13_May_SF_Bin78_scaffold_196_c2_16474-17808_1	Sqr III	13_May_SF_Bin78	d__Bacteria;p__Gemmatimonadota;c__Gemmatimonadetes;o__Gemmatimonadales;f__GWC2-71-9;g__;s__
13_May_SF_Bin79_scaffold_9475_c1_4388-5722_1	Sqr III	13_May_SF_Bin79	d__Bacteria;p__Gemmatimonadota;c__Gemmatimonadetes;o__Gemmatimonadales;f__GWC2-71-9;g__WVYX01;s__
13_May_SF_Bin3_scaffold_41810_c1_2-973_1	Sqr III	13_May_SF_Bin3	d__Bacteria;p__Gemmatimonadota;c__Gemmatimonadetes;o__Longimicrobiales;f__UBA6960;g__;s__
13_May_SF_Bin13_scaffold_2024_c1_15383-16522_1	Sqr III	13_May_SF_Bin13	d__Bacteria;p__Proteobacteria;c__Alphaproteobacteria;o__UBA8366;f__JADFVY01;g__JADFVY01;s__
13_May_SF_Bin71_scaffold_448_c1_2100-3233_1	Sqr III	13_May_SF_Bin71	d__Bacteria;p__Proteobacteria;c__Gammaproteobacteria;o__Acidiferrobacterales;f__Sulfurifustaceae;g__Sulfuricaulis;s__
13_May_SF_Bin7_scaffold_1899_c1_11718-12851_1	Sqr III	13_May_SF_Bin7	d__Bacteria;p__Proteobacteria;c__Gammaproteobacteria;o__Burkholderiales;f__SG8-39;g__JAABQT01;s__
13_May_SF_Bin22_scaffold_2728_c1_12237-13970_1	Sqr II	13_May_SF_Bin22	d__Bacteria;p__Proteobacteria;c__Gammaproteobacteria;o__Woeseiales;f__Woeseiaceae;g__JAACFB01;s__
13_Oct_SF_Bin29_scaffold_15295_c1_1766-2758_1	Sqr III	13_Oct_SF_Bin29	d__Bacteria;p__Desulfobacterota;c__Desulfobacteria;o__Desulfobacterales;f__UBA11574;g__JAAXQD01;s__
13_Oct_SF_Bin32_scaffold_179_c1_1307-2299_1	Sqr III	13_Oct_SF_Bin32	d__Bacteria;p__Desulfobacterota;c__Desulfobacteria;o__Desulfobacterales;f__UBA11574;g__UBA11574;s__UBA11574 sp002868985
13_Oct_SF_Bin32_scaffold_302_c1_209-784_1	Sqr I	13_Oct_SF_Bin32	d__Bacteria;p__Desulfobacterota;c__Desulfobacteria;o__Desulfobacterales;f__UBA11574;g__UBA11574;s__UBA11574 sp002868985
13_Oct_SF_Bin32_scaffold_704_c1_3-617_1	Sqr I	13_Oct_SF_Bin32	d__Bacteria;p__Desulfobacterota;c__Desulfobacteria;o__Desulfobacterales;f__UBA11574;g__UBA11574;s__UBA11574 sp002868985
13_Oct_SF_Bin15_scaffold_580_c1_9584-10819_1	Sqr III	13_Oct_SF_Bin15	d__Bacteria;p__Desulfobacterota;c__Syntrophobacteria;o__BM002;f__BM002;g__BM002;s__BM002 sp002899795
21_Jan_SF_Bin62_scaffold_17137_c1_534-1814_1	Sqr III	21_Jan_SF_Bin62	d__Bacteria;p__Acidobacteriota;c__Thermoanaerobaculia;o__UBA5704;f__UBA5704;g__;s__
21_Jan_SF_Bin67_scaffold_943_c1_4540-5736_1	Sqr II	21_Jan_SF_Bin67	d__Bacteria;p__Actinobacteriota;c__Acidimicrobiia;o__Acidimicrobiales;f__;g__;s__
21_Jan_SF_Bin53_scaffold_24069_c1_52-1251_1	Sqr II	21_Jan_SF_Bin53	d__Bacteria;p__Actinobacteriota;c__Acidimicrobiia;o__Acidimicrobiales;f__SHLQ01;g__;s__
21_Jan_SF_Bin50_scaffold_3264_c1_2295-3494_1	Sqr II	21_Jan_SF_Bin50	d__Bacteria;p__Actinobacteriota;c__Acidimicrobiia;o__Acidimicrobiales;f__SZUA-35;g__CADEDH01;s__
21_Jan_SF_Bin8_scaffold_1046_c1_22079-23314_1	Sqr III	21_Jan_SF_Bin8	d__Bacteria;p__Actinobacteriota;c__Acidimicrobiia;o__UBA5794;f__;g__;s__
21_Jan_SF_Bin4_scaffold_1666_c1_47-1237_1	Sqr II	21_Jan_SF_Bin4	d__Bacteria;p__Bacteroidota;c__Bacteroidia;o__Chitinophagales;f__Saprospiraceae;g__;s__
21_Jan_SF_Bin48_scaffold_12937_c1_2674-3933_1	Sqr II	21_Jan_SF_Bin48	d__Bacteria;p__Bacteroidota;c__Bacteroidia;o__Cytophagales;f__Cyclobacteriaceae;g__;s__
21_Jan_SF_Bin5_scaffold_61923_c1_1168-2400_1	Sqr III	21_Jan_SF_Bin5	d__Bacteria;p__Chloroflexota;c__Anaerolineae;o__4572-78;f__J111;g__J095;s__
21_Jan_SF_Bin74_scaffold_8934_c1_5721-6929_1	Sqr IV	21_Jan_SF_Bin74	d__Bacteria;p__Gemmatimonadota;c__Gemmatimonadetes;o__KS3-K002;f__JABDQB01;g__;s__
21_Jan_SF_Bin46_scaffold_34_c1_86138-87391_1	Sqr III	21_Jan_SF_Bin46	d__Bacteria;p__Myxococcota;c__Polyangia;o__Polyangiales;f__SG8-38;g__;s__
21_Jan_SF_Bin28_scaffold_461_c1_30744-31997_1	Sqr III	21_Jan_SF_Bin28	d__Bacteria;p__Myxococcota;c__Polyangia;o__Polyangiales;f__SG8-38;g__SG8-38;s__
21_Jan_SF_Bin24_scaffold_9625_c1_2151-3140_1	Sqr I	21_Jan_SF_Bin24	d__Bacteria;p__Proteobacteria;c__Alphaproteobacteria;o__Geminicoccales;f__Geminicoccaceae;g__CADEGR01;s__
21_Jan_SF_Bin10_scaffold_34163_c1_2034-3173_1	Sqr III	21_Jan_SF_Bin10	d__Bacteria;p__Proteobacteria;c__Alphaproteobacteria;o__Kiloniellales;f__J153;g__;s__
21_Jan_SF_Bin39_scaffold_48283_c1_1017-2291_1	Sqr I	21_Jan_SF_Bin39	d__Bacteria;p__Proteobacteria;c__Gammaproteobacteria;o__Arenicellales;f__JAANXG01;g__;s__
21_Jan_SF_Bin40_scaffold_5098_c1_7904-9619_1	Sqr II	21_Jan_SF_Bin40	d__Bacteria;p__Proteobacteria;c__Gammaproteobacteria;o__Pseudomonadales;f__HTCC2089;g__;s__
21_Jan_SF_Bin34_scaffold_3057_c1_4072-5199_1	Sqr III	21_Jan_SF_Bin34	d__Bacteria;p__Proteobacteria;c__Gammaproteobacteria;o__UBA4575;f__UBA4575;g__JABDMD01;s__JABDMD01 sp013001685
21_July_SF_Bin1_scaffold_84_c1_20852-21427_1	Sqr I	21_July_SF_Bin1	d__Bacteria;p__Desulfobacterota;c__Desulfobacteria;o__Desulfobacterales;f__UBA11574;g__UBA11574;s__UBA11574 sp002868985
21_July_SF_Bin16_scaffold_15558_c1_240-1475_1	Sqr III	21_July_SF_Bin16	d__Bacteria;p__Desulfobacterota;c__Syntrophobacteria;o__BM002;f__BM002;g__BM002;s__BM002 sp002899795
21_May_SF_Bin10_scaffold_27160_c1_2-1198_1	Sqr II	21_May_SF_Bin10	d__Bacteria;p__Bacteroidota;c__Bacteroidia;o__Flavobacteriales;f__Flavobacteriaceae;g__HDS-28;s__
21_May_SF_Bin32_scaffold_25351_c1_1030-2181_1	Sqr III	21_May_SF_Bin32	d__Bacteria;p__Desulfobacterota;c__Desulfobacteria;o__Desulfobacterales;f__;g__;s__
21_May_SF_Bin9_scaffold_195_c1_76-651_1	Sqr I	21_May_SF_Bin9	d__Bacteria;p__Desulfobacterota;c__Desulfobacteria;o__Desulfobacterales;f__UBA11574;g__UBA11574;s__UBA11574 sp002868985
21_May_SF_Bin9_scaffold_93_c1_4012-5004_1	Sqr III	21_May_SF_Bin9	d__Bacteria;p__Desulfobacterota;c__Desulfobacteria;o__Desulfobacterales;f__UBA11574;g__UBA11574;s__UBA11574 sp002868985
21_May_SF_Bin9_scaffold_983_c1_209-853_1	Sqr I	21_May_SF_Bin9	d__Bacteria;p__Desulfobacterota;c__Desulfobacteria;o__Desulfobacterales;f__UBA11574;g__UBA11574;s__UBA11574 sp002868985
21_May_SF_Bin23_scaffold_12381_c1_2647-3144_1	Sqr III	21_May_SF_Bin23	d__Bacteria;p__Myxococcota;c__Polyangia;o__Polyangiales;f__SG8-38;g__SG8-38;s__
21_May_SF_Bin23_scaffold_22634_c1_535-1776_1	Sqr III	21_May_SF_Bin23	d__Bacteria;p__Myxococcota;c__Polyangia;o__Polyangiales;f__SG8-38;g__SG8-38;s__
21_May_SF_Bin23_scaffold_29000_c1_2-691_1	Sqr III	21_May_SF_Bin23	d__Bacteria;p__Myxococcota;c__Polyangia;o__Polyangiales;f__SG8-38;g__SG8-38;s__
21_May_SF_Bin33_scaffold_5528_c1_1355-2494_1	Sqr III	21_May_SF_Bin33	d__Bacteria;p__Proteobacteria;c__Alphaproteobacteria;o__Kiloniellales;f__J153;g__;s__
21_May_SF_Bin27_scaffold_524_c1_13247-14515_1	Sqr I	21_May_SF_Bin27	d__Bacteria;p__Proteobacteria;c__Gammaproteobacteria;o__UBA9214;f__UBA9214;g__UBA9214;s__
21_May_SF_Bin5_scaffold_4034_c1_2270-3556_1	Sqr I	21_May_SF_Bin5	d__Bacteria;p__Proteobacteria;c__Gammaproteobacteria;o__Xanthomonadales;f__SZUA-36;g__JABDPF01;s__
21_May_SF_Bin5_scaffold_5884_c1_1310-2449_1	Sqr VI	21_May_SF_Bin5	d__Bacteria;p__Proteobacteria;c__Gammaproteobacteria;o__Xanthomonadales;f__SZUA-36;g__JABDPF01;s__
21_Oct_SF_Bin11_scaffold_4157_c1_2040-3293_1	Sqr III	21_Oct_SF_Bin11	d__Bacteria;p__Myxococcota;c__Polyangia;o__Polyangiales;f__SG8-38;g__;s__
21_Oct_SF_Bin14_scaffold_10170_c1_1183-2424_1	Sqr III	21_Oct_SF_Bin14	d__Bacteria;p__Desulfobacterota;c__Desulfobacteria;o__Desulfobacterales;f__UBA2174_A;g__;s__
21_Oct_SF_Bin17_scaffold_130_c1_1824-2336_1	Sqr I	21_Oct_SF_Bin17	d__Bacteria;p__Desulfobacterota;c__Desulfobacteria;o__Desulfobacterales;f__UBA11574;g__UBA11574;s__UBA11574 sp002868985
21_Oct_SF_Bin17_scaffold_130_c1_2374-2949_1	Sqr I	21_Oct_SF_Bin17	d__Bacteria;p__Desulfobacterota;c__Desulfobacteria;o__Desulfobacterales;f__UBA11574;g__UBA11574;s__UBA11574 sp002868985
21_Oct_SF_Bin17_scaffold_36_c1_19432-20424_1	Sqr III	21_Oct_SF_Bin17	d__Bacteria;p__Desulfobacterota;c__Desulfobacteria;o__Desulfobacterales;f__UBA11574;g__UBA11574;s__UBA11574 sp002868985
21_Oct_SF_Bin24_scaffold_965_c1_6209-7444_1	Sqr III	21_Oct_SF_Bin24	d__Bacteria;p__Desulfobacterota;c__Syntrophobacteria;o__BM002;f__BM002;g__BM002;s__BM002 sp002899795
24_Jan_SF_Bin13_scaffold_5581_c1_3-500_1	Sqr I	24_Jan_SF_Bin13	d__Bacteria;p__Desulfobacterota;c__Desulfobacteria;o__Desulfobacterales;f__UBA11574;g__UBA11574;s__UBA11574 sp002868985
24_Jan_SF_Bin13_scaffold_5581_c1_538-1113_1	Sqr I	24_Jan_SF_Bin13	d__Bacteria;p__Desulfobacterota;c__Desulfobacteria;o__Desulfobacterales;f__UBA11574;g__UBA11574;s__UBA11574 sp002868985
24_Jan_SF_Bin13_scaffold_9924_c1_2256-3041_1	Sqr III	24_Jan_SF_Bin13	d__Bacteria;p__Desulfobacterota;c__Desulfobacteria;o__Desulfobacterales;f__UBA11574;g__UBA11574;s__UBA11574 sp002868985
24_Jan_SF_Bin17_scaffold_6440_c1_1674-2909_1	Sqr III	24_Jan_SF_Bin17	d__Bacteria;p__Desulfobacterota;c__Syntrophobacteria;o__BM002;f__BM002;g__BM002;s__BM002 sp002899795
24_Jan_SF_Bin23_scaffold_11834_c1_1-498_1	Sqr III	24_Jan_SF_Bin23	d__Bacteria;p__Proteobacteria;c__Alphaproteobacteria;o__Kiloniellales;f__J153;g__;s__
24_Jan_SF_Bin6_scaffold_15772_c1_2-562_1	Sqr I	24_Jan_SF_Bin6	d__Bacteria;p__Proteobacteria;c__Gammaproteobacteria;o__UBA9214;f__UBA9214;g__UBA9214;s__
24_Jan_SF_Bin6_scaffold_937_c1_2310-3578_1	Sqr I	24_Jan_SF_Bin6	d__Bacteria;p__Proteobacteria;c__Gammaproteobacteria;o__UBA9214;f__UBA9214;g__UBA9214;s__
24_July_SF_Bin12_scaffold_6175_c1_791-2026_1	Sqr III	24_July_SF_Bin12	d__Bacteria;p__Desulfobacterota;c__Syntrophobacteria;o__BM002;f__BM002;g__BM002;s__BM002 sp002899795
24_July_SF_Bin17_scaffold_13088_c1_2096-2470_1	Sqr III	24_July_SF_Bin17	d__Bacteria;p__Proteobacteria;c__Alphaproteobacteria;o__Kiloniellales;f__J153;g__;s__
24_July_SF_Bin17_scaffold_4871_c1_2-580_1	Sqr III	24_July_SF_Bin17	d__Bacteria;p__Proteobacteria;c__Alphaproteobacteria;o__Kiloniellales;f__J153;g__;s__
24_July_SF_Bin20_scaffold_1709_c1_937-2205_1	Sqr I	24_July_SF_Bin20	d__Bacteria;p__Proteobacteria;c__Gammaproteobacteria;o__UBA9214;f__UBA9214;g__UBA9214;s__
24_July_SF_Bin20_scaffold_601_c1_1439-2710_1	Sqr I	24_July_SF_Bin20	d__Bacteria;p__Proteobacteria;c__Gammaproteobacteria;o__UBA9214;f__UBA9214;g__UBA9214;s__
24_July_SF_Bin2_scaffold_19649_c1_1-1260_1	Sqr I	24_July_SF_Bin2	d__Bacteria;p__Proteobacteria;c__Gammaproteobacteria;o__Xanthomonadales;f__SZUA-36;g__JABDPF01;s__
24_July_SF_Bin2_scaffold_513_c1_2536-3675_1	Sqr VI	24_July_SF_Bin2	d__Bacteria;p__Proteobacteria;c__Gammaproteobacteria;o__Xanthomonadales;f__SZUA-36;g__JABDPF01;s__
24_July_SF_Bin11_scaffold_12114_c1_1268-2548_1	Sqr II	24_July_SF_Bin11	d__Bacteria;p__Proteobacteria;c__Gammaproteobacteria;o__Xanthomonadales;f__SZUA-36;g__SZUA-36;s__
24_May_SF_Bin5_scaffold_3560_c1_227-1462_1	Sqr III	24_May_SF_Bin5	d__Bacteria;p__Actinobacteriota;c__Actinomycetia;o__Nanopelagicales;f__;g__;s__
24_May_SF_Bin27_scaffold_6387_c1_1290-2522_1	Sqr III	24_May_SF_Bin27	d__Bacteria;p__Chloroflexota;c__Anaerolineae;o__Anaerolineales;f__UBA11579;g__;s__
24_May_SF_Bin10_scaffold_8_c1_41220-42350_1	Sqr VI	24_May_SF_Bin10	d__Bacteria;p__Desulfobacterota;c__JADFVX01;o__JADFVX01;f__;g__;s__
24_May_SF_Bin32_scaffold_875_c1_6534-7769_1	Sqr III	24_May_SF_Bin32	d__Bacteria;p__Desulfobacterota;c__Syntrophobacteria;o__BM002;f__BM002;g__BM002;s__BM002 sp002899795
24_May_SF_Bin29_scaffold_684_c1_2-916_1	Sqr I	24_May_SF_Bin29	d__Bacteria;p__Proteobacteria;c__Gammaproteobacteria;o__UBA6429;f__UBA6429;g__;s__
24_May_SF_Bin19_scaffold_1659_c1_4995-6263_1	Sqr I	24_May_SF_Bin19	d__Bacteria;p__Proteobacteria;c__Gammaproteobacteria;o__UBA9214;f__UBA9214;g__UBA9214;s__
24_May_SF_Bin19_scaffold_9451_c1_2370-3035_1	Sqr I	24_May_SF_Bin19	d__Bacteria;p__Proteobacteria;c__Gammaproteobacteria;o__UBA9214;f__UBA9214;g__UBA9214;s__
24_May_SF_Bin1_scaffold_1146_c1_3079-4218_1	Sqr VI	24_May_SF_Bin1	d__Bacteria;p__Proteobacteria;c__Gammaproteobacteria;o__Xanthomonadales;f__SZUA-36;g__JABDPF01;s__
24_May_SF_Bin1_scaffold_210_c1_9681-10967_1	Sqr I	24_May_SF_Bin1	d__Bacteria;p__Proteobacteria;c__Gammaproteobacteria;o__Xanthomonadales;f__SZUA-36;g__JABDPF01;s__
24_Oct_SF_Bin4_scaffold_5065_c1_1349-2584_1	Sqr III	24_Oct_SF_Bin4	d__Bacteria;p__Actinobacteriota;c__Actinomycetia;o__Nanopelagicales;f__GCA-2699445;g__;s__
24_Oct_SF_Bin38_scaffold_20477_c1_265-1506_1	Sqr III	24_Oct_SF_Bin38	d__Bacteria;p__Desulfobacterota;c__Desulfobacteria;o__Desulfobacterales;f__SURF-15;g__;s__
24_Oct_SF_Bin1_scaffold_845_c1_5668-6903_1	Sqr III	24_Oct_SF_Bin1	d__Bacteria;p__Desulfobacterota;c__Syntrophobacteria;o__BM002;f__BM002;g__BM002;s__BM002 sp002899795
24_Oct_SF_Bin19_scaffold_3890_c1_2038-3177_1	Sqr III	24_Oct_SF_Bin19	d__Bacteria;p__Proteobacteria;c__Alphaproteobacteria;o__Kiloniellales;f__J153;g__;s__
24_Oct_SF_Bin23_scaffold_5912_c1_1161-2843_1	Sqr II	24_Oct_SF_Bin23	d__Bacteria;p__Proteobacteria;c__Gammaproteobacteria;o__Pseudomonadales;f__Halieaceae;g__Halioglobus;s__
24_Oct_SF_Bin33_scaffold_1928_c1_2370-3641_1	Sqr I	24_Oct_SF_Bin33	d__Bacteria;p__Proteobacteria;c__Gammaproteobacteria;o__UBA9214;f__UBA9214;g__UBA9214;s__
24_Oct_SF_Bin33_scaffold_450_c1_6722-7990_1	Sqr I	24_Oct_SF_Bin33	d__Bacteria;p__Proteobacteria;c__Gammaproteobacteria;o__UBA9214;f__UBA9214;g__UBA9214;s__
24_Oct_SF_Bin28_scaffold_1232_c1_1380-2666_1	Sqr I	24_Oct_SF_Bin28	d__Bacteria;p__Proteobacteria;c__Gammaproteobacteria;o__Xanthomonadales;f__SZUA-36;g__JABDPF01;s__
24_Oct_SF_Bin28_scaffold_2851_c1_1127-2266_1	Sqr VI	24_Oct_SF_Bin28	d__Bacteria;p__Proteobacteria;c__Gammaproteobacteria;o__Xanthomonadales;f__SZUA-36;g__JABDPF01;s__
24_Oct_SF_Bin7_scaffold_1403_c1_453-2147_1	Sqr II	24_Oct_SF_Bin7	d__Bacteria;p__Proteobacteria;c__Gammaproteobacteria;o__Xanthomonadales;f__SZUA-36;g__SZUA-36;s__
24_Oct_SF_Bin7_scaffold_1866_c1_6729-7856_1	Sqr VI	24_Oct_SF_Bin7	d__Bacteria;p__Proteobacteria;c__Gammaproteobacteria;o__Xanthomonadales;f__SZUA-36;g__SZUA-36;s__
4_1_Jan_SF_Bin21_scaffold_11665_c1_2883-4121_1	Sqr III	4_1_Jan_SF_Bin21	d__Bacteria;p__Acidobacteriota;c__Vicinamibacteria;o__Vicinamibacterales;f__UBA2999;g__VFZN01;s__
4_1_Jan_SF_Bin58_scaffold_3692_c1_1-1092_1	Sqr II	4_1_Jan_SF_Bin58	d__Bacteria;p__Actinobacteriota;c__Acidimicrobiia;o__Acidimicrobiales;f__CAIXPF01;g__WHTX01;s__
4_1_Jan_SF_Bin55_scaffold_2100_c1_2282-3490_1	Sqr IV	4_1_Jan_SF_Bin55	d__Bacteria;p__Actinobacteriota;c__Acidimicrobiia;o__Acidimicrobiales;f__SHLQ01;g__JABDJW01;s__
4_1_Jan_SF_Bin7_scaffold_2969_c1_4797-6035_1	Sqr III	4_1_Jan_SF_Bin7	d__Bacteria;p__Actinobacteriota;c__Acidimicrobiia;o__UBA5794;f__;g__;s__
4_1_Jan_SF_Bin59_scaffold_8500_c1_586-1917_1	Sqr III	4_1_Jan_SF_Bin59	d__Bacteria;p__Actinobacteriota;c__Actinomycetia;o__Nanopelagicales;f__;g__;s__
4_1_Jan_SF_Bin18_scaffold_7417_c1_2545-3798_1	Sqr III	4_1_Jan_SF_Bin18	d__Bacteria;p__Actinobacteriota;c__Thermoleophilia;o__Gaiellales;f__Gaiellaceae;g__GMQP-bins7;s__
4_1_Jan_SF_Bin49_scaffold_877_c1_4559-5743_1	Sqr III	4_1_Jan_SF_Bin49	d__Bacteria;p__Actinobacteriota;c__UBA4738;o__UBA4738;f__HRBIN12;g__AC-51;s__
4_1_Jan_SF_Bin44_scaffold_8125_c1_3557-4822_1	Sqr III	4_1_Jan_SF_Bin44	d__Bacteria;p__Bacteroidota;c__Bacteroidia;o__Cytophagales;f__Cyclobacteriaceae;g__Chryseolinea;s__
4_1_Jan_SF_Bin16_scaffold_2657_c1_2838-4121_1	Sqr I	4_1_Jan_SF_Bin16	d__Bacteria;p__Nitrospirota;c__;o__;f__;g__;s__
4_1_Jan_SF_Bin27_scaffold_2623_c1_796-2043_1	Sqr I	4_1_Jan_SF_Bin27	d__Bacteria;p__Nitrospirota;c__Nitrospiria;o__Nitrospirales;f__Nitrospiraceae;g__Nitrospira_F;s__
4_1_Jan_SF_Bin41_scaffold_10140_c1_526-1773_1	Sqr I	4_1_Jan_SF_Bin41	d__Bacteria;p__Nitrospirota;c__Nitrospiria;o__Nitrospirales;f__Nitrospiraceae;g__Nitrospira_F;s__
4_1_Jan_SF_Bin42_scaffold_3042_c1_5621-6859_1	Sqr I	4_1_Jan_SF_Bin42	d__Bacteria;p__Nitrospirota;c__Nitrospiria;o__Nitrospirales;f__Nitrospiraceae;g__Nitrospira_F;s__
4_1_Jan_SF_Bin53_scaffold_4042_c1_6358-7605_1	Sqr I	4_1_Jan_SF_Bin53	d__Bacteria;p__Nitrospirota;c__Nitrospiria;o__Nitrospirales;f__Nitrospiraceae;g__Nitrospira_F;s__
4_1_Jan_SF_Bin13_scaffold_13505_c1_2018-3253_1	Sqr III	4_1_Jan_SF_Bin13	d__Bacteria;p__Nitrospirota;c__Thermodesulfovibrionia;o__UBA6902;f__UBA6902;g__;s__
4_1_Jan_SF_Bin13_scaffold_3026_c1_6829-8061_1	Sqr III	4_1_Jan_SF_Bin13	d__Bacteria;p__Nitrospirota;c__Thermodesulfovibrionia;o__UBA6902;f__UBA6902;g__;s__
4_1_Jan_SF_Bin64_scaffold_28185_c1_238-1509_1	Sqr I	4_1_Jan_SF_Bin64	d__Bacteria;p__Proteobacteria;c__Gammaproteobacteria;o__Burkholderiales;f__Burkholderiaceae;g__;s__
4_1_Jan_SF_Bin33_scaffold_6871_c1_3482-4756_1	Sqr I	4_1_Jan_SF_Bin33	d__Bacteria;p__Proteobacteria;c__Gammaproteobacteria;o__Burkholderiales;f__Burkholderiaceae;g__CADEEN01;s__
4_1_Jan_SF_Bin43_scaffold_16401_c1_2-535_1	Sqr I	4_1_Jan_SF_Bin43	d__Bacteria;p__Proteobacteria;c__Gammaproteobacteria;o__Steroidobacterales;f__Steroidobacteraceae;g__RPQJ01;s__
4_1_Jan_SF_Bin60_scaffold_3477_c1_3865-5136_1	Sqr I	4_1_Jan_SF_Bin60	d__Bacteria;p__Proteobacteria;c__Gammaproteobacteria;o__Steroidobacterales;f__Steroidobacteraceae;g__RPQJ01;s__
4_1_Jan_SF_Bin26_scaffold_2863_c1_5815-7095_1	Sqr I	4_1_Jan_SF_Bin26	d__Bacteria;p__Proteobacteria;c__Gammaproteobacteria;o__Woeseiales;f__Woeseiaceae;g__;s__
4_1_Jan_SF_Bin32_scaffold_68_c1_7468-8751_1	Sqr I	4_1_Jan_SF_Bin32	d__Bacteria;p__Proteobacteria;c__Gammaproteobacteria;o__Woeseiales;f__Woeseiaceae;g__IDS-8;s__
4_1_Jan_SF_Bin67_scaffold_1314_c1_5410-6693_1	Sqr I	4_1_Jan_SF_Bin67	d__Bacteria;p__Proteobacteria;c__Gammaproteobacteria;o__Woeseiales;f__Woeseiaceae;g__JAACFB01;s__
4_1_Jan_SF_Bin31_scaffold_28428_c1_728-2005_1	Sqr I	4_1_Jan_SF_Bin31	d__Bacteria;p__Proteobacteria;c__Gammaproteobacteria;o__Woeseiales;f__Woeseiaceae;g__SZUA-117;s__
4_1_Jan_SF_Bin34_scaffold_3799_c1_7323-8381_1	Sqr I	4_1_Jan_SF_Bin34	d__Bacteria;p__Proteobacteria;c__Gammaproteobacteria;o__Woeseiales;f__Woeseiaceae;g__UBA1847;s__
4_1_July_SF_Bin30_scaffold_7262_c1_5178-6176_1	Sqr III	4_1_July_SF_Bin30	d__Bacteria;p__Acidobacteriota;c__Aminicenantia;o__Aminicenantales;f__RBG-16-66-30;g__;s__
4_1_July_SF_Bin61_scaffold_15027_c1_3522-3911_1	Sqr III	4_1_July_SF_Bin61	d__Bacteria;p__Acidobacteriota;c__Aminicenantia;o__Aminicenantales;f__UBA8522;g__UBA8522;s__
4_1_July_SF_Bin60_scaffold_2033_c1_11527-12810_1	Sqr I	4_1_July_SF_Bin60	d__Bacteria;p__Desulfobacterota;c__Desulfobacteria;o__Desulfobacterales;f__UBA11574;g__UBA11574;s__
4_1_July_SF_Bin60_scaffold_2097_c1_6586-7578_1	Sqr III	4_1_July_SF_Bin60	d__Bacteria;p__Desulfobacterota;c__Desulfobacteria;o__Desulfobacterales;f__UBA11574;g__UBA11574;s__
4_1_July_SF_Bin50_scaffold_318_c1_15183-16421_1	Sqr I	4_1_July_SF_Bin50	d__Bacteria;p__Nitrospirota;c__Nitrospiria;o__Nitrospirales;f__Nitrospiraceae;g__Nitrospira_F;s__
4_1_July_SF_Bin53_scaffold_838_c1_8469-9716_1	Sqr I	4_1_July_SF_Bin53	d__Bacteria;p__Nitrospirota;c__Nitrospiria;o__Nitrospirales;f__Nitrospiraceae;g__Nitrospira_F;s__
4_1_July_SF_Bin20_scaffold_1045_c1_4733-5923_1	Sqr I	4_1_July_SF_Bin20	d__Bacteria;p__Nitrospirota;c__UBA9217;o__UBA9217;f__UBA9217;g__;s__
4_1_July_SF_Bin49_scaffold_15691_c1_708-1979_1	Sqr I	4_1_July_SF_Bin49	d__Bacteria;p__Proteobacteria;c__Gammaproteobacteria;o__Burkholderiales;f__Gallionellaceae;g__Gallionella;s__
4_1_July_SF_Bin22_scaffold_4_c1_56099-57511_1	Sqr II	4_1_July_SF_Bin22	d__Bacteria;p__SAR324;c__SAR324;o__SAR324;f__;g__;s__
4_1_July_SF_Bin25_scaffold_8833_c1_1103-2284_1	Sqr I	4_1_July_SF_Bin25	d__Bacteria;p__Spirochaetota;c__UBA6919;o__UBA6919;f__UBA6919;g__;s__
4_1_May_SF_Bin1_scaffold_10735_c1_4076-4654_1	Sqr II	4_1_May_SF_Bin1	d__Bacteria;p__Actinobacteriota;c__Acidimicrobiia;o__Acidimicrobiales;f__SZUA-35;g__CADEDH01;s__
4_1_May_SF_Bin1_scaffold_2151_c1_8927-10135_1	Sqr IV	4_1_May_SF_Bin1	d__Bacteria;p__Actinobacteriota;c__Acidimicrobiia;o__Acidimicrobiales;f__SZUA-35;g__CADEDH01;s__
4_1_May_SF_Bin50_scaffold_33981_c1_1420-2628_1	Sqr II	4_1_May_SF_Bin50	d__Bacteria;p__Actinobacteriota;c__Acidimicrobiia;o__Acidimicrobiales;f__SZUA-35;g__CADEDH01;s__
4_1_May_SF_Bin47_scaffold_17828_c1_2980-3600_1	Sqr III	4_1_May_SF_Bin47	d__Bacteria;p__Actinobacteriota;c__Acidimicrobiia;o__UBA5794;f__;g__;s__
4_1_May_SF_Bin62_scaffold_9166_c1_106-1437_1	Sqr III	4_1_May_SF_Bin62	d__Bacteria;p__Actinobacteriota;c__Actinomycetia;o__Nanopelagicales;f__;g__;s__
4_1_May_SF_Bin52_scaffold_5865_c1_4031-5278_1	Sqr III	4_1_May_SF_Bin52	d__Bacteria;p__Actinobacteriota;c__Thermoleophilia;o__Gaiellales;f__Gaiellaceae;g__Gaiella;s__
4_1_May_SF_Bin55_scaffold_1250_c1_6939-8192_1	Sqr III	4_1_May_SF_Bin55	d__Bacteria;p__Actinobacteriota;c__Thermoleophilia;o__Gaiellales;f__Gaiellaceae;g__GMQP-bins7;s__
4_1_May_SF_Bin66_scaffold_202_c1_44804-45988_1	Sqr III	4_1_May_SF_Bin66	d__Bacteria;p__Actinobacteriota;c__UBA4738;o__UBA4738;f__HRBIN12;g__AC-51;s__
4_1_May_SF_Bin10_scaffold_1273_c1_1-975_1	Sqr III	4_1_May_SF_Bin10	d__Bacteria;p__Bacteroidota;c__Bacteroidia;o__Cytophagales;f__Cyclobacteriaceae;g__Chryseolinea;s__
4_1_May_SF_Bin54_scaffold_1927_c1_9472-10626_1	Sqr III	4_1_May_SF_Bin54	d__Bacteria;p__Chloroflexota;c__Limnocylindria;o__QHBO01;f__QHBO01;g__;s__
4_1_May_SF_Bin4_scaffold_2202_c1_11591-12034_1	Sqr III	4_1_May_SF_Bin4	d__Bacteria;p__Desulfobacterota;c__Desulfobulbia;o__Desulfobulbales;f__Desulfobulbaceae;g__;s__
4_1_May_SF_Bin4_scaffold_3558_c1_3-560_1	Sqr III	4_1_May_SF_Bin4	d__Bacteria;p__Desulfobacterota;c__Desulfobulbia;o__Desulfobulbales;f__Desulfobulbaceae;g__;s__
4_1_May_SF_Bin58_scaffold_529_c1_8162-9352_1	Sqr I	4_1_May_SF_Bin58	d__Bacteria;p__Desulfobacterota;c__Desulfobulbia;o__Desulfobulbales;f__Desulfurivibrionaceae;g__UBA2262;s__UBA2262 sp013349295
4_1_May_SF_Bin36_scaffold_2582_c1_6903-8150_1	Sqr I	4_1_May_SF_Bin36	d__Bacteria;p__Nitrospirota;c__Nitrospiria;o__Nitrospirales;f__Nitrospiraceae;g__Nitrospira_F;s__
4_1_May_SF_Bin53_scaffold_3074_c1_5649-6887_1	Sqr I	4_1_May_SF_Bin53	d__Bacteria;p__Nitrospirota;c__Nitrospiria;o__Nitrospirales;f__Nitrospiraceae;g__Nitrospira_F;s__
4_1_May_SF_Bin59_scaffold_2694_c1_796-2043_1	Sqr I	4_1_May_SF_Bin59	d__Bacteria;p__Nitrospirota;c__Nitrospiria;o__Nitrospirales;f__Nitrospiraceae;g__Nitrospira_F;s__
4_1_May_SF_Bin30_scaffold_52633_c1_360-1634_1	Sqr I	4_1_May_SF_Bin30	d__Bacteria;p__Proteobacteria;c__Gammaproteobacteria;o__Burkholderiales;f__Burkholderiaceae;g__CADEEN01;s__
4_1_May_SF_Bin26_scaffold_19053_c1_364-1638_1	Sqr I	4_1_May_SF_Bin26	d__Bacteria;p__Proteobacteria;c__Gammaproteobacteria;o__Burkholderiales;f__Gallionellaceae;g__VIKH01;s__
4_1_May_SF_Bin26_scaffold_9832_c1_725-1996_1	Sqr I	4_1_May_SF_Bin26	d__Bacteria;p__Proteobacteria;c__Gammaproteobacteria;o__Burkholderiales;f__Gallionellaceae;g__VIKH01;s__
4_1_May_SF_Bin43_scaffold_7783_c1_3821-5092_1	Sqr I	4_1_May_SF_Bin43	d__Bacteria;p__Proteobacteria;c__Gammaproteobacteria;o__Steroidobacterales;f__Steroidobacteraceae;g__RPQJ01;s__
4_1_May_SF_Bin67_scaffold_3623_c1_267-1535_1	Sqr I	4_1_May_SF_Bin67	d__Bacteria;p__Proteobacteria;c__Gammaproteobacteria;o__Steroidobacterales;f__Steroidobacteraceae;g__RPQJ01;s__
4_1_May_SF_Bin35_scaffold_2846_c1_4578-5858_1	Sqr I	4_1_May_SF_Bin35	d__Bacteria;p__Proteobacteria;c__Gammaproteobacteria;o__Woeseiales;f__Woeseiaceae;g__;s__
4_1_May_SF_Bin44_scaffold_338_c1_8584-9867_1	Sqr I	4_1_May_SF_Bin44	d__Bacteria;p__Proteobacteria;c__Gammaproteobacteria;o__Woeseiales;f__Woeseiaceae;g__IDS-8;s__
4_1_May_SF_Bin74_scaffold_2453_c1_5771-7054_1	Sqr I	4_1_May_SF_Bin74	d__Bacteria;p__Proteobacteria;c__Gammaproteobacteria;o__Woeseiales;f__Woeseiaceae;g__JAACFB01;s__
4_1_May_SF_Bin72_scaffold_6259_c1_86-1369_1	Sqr I	4_1_May_SF_Bin72	d__Bacteria;p__Proteobacteria;c__Gammaproteobacteria;o__Woeseiales;f__Woeseiaceae;g__UBA1847;s__
4_1_Oct_SF_Bin17_scaffold_7431_c1_4761-5171_1	Sqr III	4_1_Oct_SF_Bin17	d__Bacteria;p__Actinobacteriota;c__Acidimicrobiia;o__UBA5794;f__;g__;s__
4_1_Oct_SF_Bin19_scaffold_25347_c1_1182-2507_1	Sqr III	4_1_Oct_SF_Bin19	d__Bacteria;p__Actinobacteriota;c__Actinomycetia;o__Nanopelagicales;f__;g__;s__
4_1_Oct_SF_Bin14_scaffold_3558_c1_4391-5644_1	Sqr III	4_1_Oct_SF_Bin14	d__Bacteria;p__Actinobacteriota;c__Thermoleophilia;o__Gaiellales;f__Gaiellaceae;g__GMQP-bins7;s__
4_1_Oct_SF_Bin20_scaffold_1489_c1_5596-6780_1	Sqr III	4_1_Oct_SF_Bin20	d__Bacteria;p__Actinobacteriota;c__UBA4738;o__UBA4738;f__HRBIN12;g__AC-51;s__
4_1_Oct_SF_Bin41_scaffold_130_c1_31847-33112_1	Sqr III	4_1_Oct_SF_Bin41	d__Bacteria;p__Bacteroidota;c__Bacteroidia;o__Cytophagales;f__Cyclobacteriaceae;g__Chryseolinea;s__
4_1_Oct_SF_Bin45_scaffold_5930_c1_2403-3560_1	Sqr III	4_1_Oct_SF_Bin45	d__Bacteria;p__Chloroflexota;c__Limnocylindria;o__Limnocylindrales;f__CSP1-4;g__SPCO01;s__
4_1_Oct_SF_Bin21_scaffold_9833_c1_640-1956_1	Sqr III	4_1_Oct_SF_Bin21	d__Bacteria;p__Gemmatimonadota;c__Gemmatimonadetes;o__Gemmatimonadales;f__GWC2-71-9;g__SZUA-320;s__
4_1_Oct_SF_Bin23_scaffold_648_c1_8469-9716_1	Sqr I	4_1_Oct_SF_Bin23	d__Bacteria;p__Nitrospirota;c__Nitrospiria;o__Nitrospirales;f__Nitrospiraceae;g__Nitrospira_F;s__
4_1_Oct_SF_Bin30_scaffold_957_c1_5629-6867_1	Sqr I	4_1_Oct_SF_Bin30	d__Bacteria;p__Nitrospirota;c__Nitrospiria;o__Nitrospirales;f__Nitrospiraceae;g__Nitrospira_F;s__
4_1_Oct_SF_Bin52_scaffold_1589_c1_6358-7605_1	Sqr I	4_1_Oct_SF_Bin52	d__Bacteria;p__Nitrospirota;c__Nitrospiria;o__Nitrospirales;f__Nitrospiraceae;g__Nitrospira_F;s__
4_1_Oct_SF_Bin51_scaffold_2004_c1_3-1031_1	Sqr I	4_1_Oct_SF_Bin51	d__Bacteria;p__Proteobacteria;c__Gammaproteobacteria;o__Burkholderiales;f__Burkholderiaceae;g__;s__
4_1_Oct_SF_Bin28_scaffold_5161_c1_3-1067_1	Sqr I	4_1_Oct_SF_Bin28	d__Bacteria;p__Proteobacteria;c__Gammaproteobacteria;o__Burkholderiales;f__Burkholderiaceae;g__CADEEN01;s__
4_1_Oct_SF_Bin31_scaffold_28728_c1_1-606_1	Sqr I	4_1_Oct_SF_Bin31	d__Bacteria;p__Proteobacteria;c__Gammaproteobacteria;o__Burkholderiales;f__Burkholderiaceae;g__Rubrivivax;s__
4_1_Oct_SF_Bin31_scaffold_9689_c1_3598-4425_1	Sqr I	4_1_Oct_SF_Bin31	d__Bacteria;p__Proteobacteria;c__Gammaproteobacteria;o__Burkholderiales;f__Burkholderiaceae;g__Rubrivivax;s__
4_1_Oct_SF_Bin49_scaffold_4145_c1_3635-4906_1	Sqr I	4_1_Oct_SF_Bin49	d__Bacteria;p__Proteobacteria;c__Gammaproteobacteria;o__Burkholderiales;f__Casimicrobiaceae;g__CAIWHR01;s__
4_1_Oct_SF_Bin40_scaffold_18203_c1_3-527_1	Sqr I	4_1_Oct_SF_Bin40	d__Bacteria;p__Proteobacteria;c__Gammaproteobacteria;o__Burkholderiales;f__Usitatibacteraceae;g__FEB-7;s__
4_1_Oct_SF_Bin38_scaffold_11251_c1_2046-3326_1	Sqr I	4_1_Oct_SF_Bin38	d__Bacteria;p__Proteobacteria;c__Gammaproteobacteria;o__GCA-2729495;f__GCA-2729495;g__SHZI01;s__
4_1_Oct_SF_Bin42_scaffold_653_c1_177-1448_1	Sqr I	4_1_Oct_SF_Bin42	d__Bacteria;p__Proteobacteria;c__Gammaproteobacteria;o__Steroidobacterales;f__Steroidobacteraceae;g__RPQJ01;s__
4_1_Oct_SF_Bin43_scaffold_1060_c1_16256-17149_1	Sqr I	4_1_Oct_SF_Bin43	d__Bacteria;p__Proteobacteria;c__Gammaproteobacteria;o__Steroidobacterales;f__Steroidobacteraceae;g__RPQJ01;s__
4_1_Oct_SF_Bin22_scaffold_2406_c1_4279-5559_1	Sqr I	4_1_Oct_SF_Bin22	d__Bacteria;p__Proteobacteria;c__Gammaproteobacteria;o__Woeseiales;f__Woeseiaceae;g__;s__
4_1_Oct_SF_Bin50_scaffold_58_c1_75971-77254_1	Sqr I	4_1_Oct_SF_Bin50	d__Bacteria;p__Proteobacteria;c__Gammaproteobacteria;o__Woeseiales;f__Woeseiaceae;g__IDS-8;s__
4_1_Oct_SF_Bin24_scaffold_1245_c1_5528-6811_1	Sqr I	4_1_Oct_SF_Bin24	d__Bacteria;p__Proteobacteria;c__Gammaproteobacteria;o__Woeseiales;f__Woeseiaceae;g__JAACFB01;s__
4_1_Oct_SF_Bin33_scaffold_6122_c1_4821-5816_1	Sqr I	4_1_Oct_SF_Bin33	d__Bacteria;p__Proteobacteria;c__Gammaproteobacteria;o__Woeseiales;f__Woeseiaceae;g__SZUA-117;s__
4_1_Oct_SF_Bin55_scaffold_3410_c1_4888-6171_1	Sqr I	4_1_Oct_SF_Bin55	d__Bacteria;p__Proteobacteria;c__Gammaproteobacteria;o__Woeseiales;f__Woeseiaceae;g__UBA1847;s__
8_1_Jan_SF_Bin58_scaffold_9887_c1_1-951_1	Sqr III	8_1_Jan_SF_Bin58	d__Archaea;p__Asgardarchaeota;c__Heimdallarchaeia;o__UBA460;f__Kariarchaeaceae;g__LC-2;s__
8_1_Jan_SF_Bin73_scaffold_6568_c1_2439-3701_1	Sqr III	8_1_Jan_SF_Bin73	d__Bacteria;p__Actinobacteriota;c__Acidimicrobiia;o__UBA5794;f__JAENVV01;g__JAENVV01;s__
8_1_Jan_SF_Bin4_scaffold_4546_c1_8538-8975_1	Sqr II	8_1_Jan_SF_Bin4	d__Bacteria;p__Bacteroidota;c__Bacteroidia;o__Cytophagales;f__Cyclobacteriaceae;g__;s__
8_1_Jan_SF_Bin4_scaffold_6945_c1_2-871_1	Sqr II	8_1_Jan_SF_Bin4	d__Bacteria;p__Bacteroidota;c__Bacteroidia;o__Cytophagales;f__Cyclobacteriaceae;g__;s__
8_1_Jan_SF_Bin40_scaffold_2816_c1_7436-8689_1	Sqr III	8_1_Jan_SF_Bin40	d__Bacteria;p__Bacteroidota;c__Bacteroidia;o__Cytophagales;f__Cyclobacteriaceae;g__;s__
8_1_Jan_SF_Bin42_scaffold_2741_c1_11187-11954_1	Sqr II	8_1_Jan_SF_Bin42	d__Bacteria;p__Bacteroidota;c__Bacteroidia;o__Cytophagales;f__Cyclobacteriaceae;g__;s__
8_1_Jan_SF_Bin42_scaffold_4157_c1_8838-9455_1	Sqr II	8_1_Jan_SF_Bin42	d__Bacteria;p__Bacteroidota;c__Bacteroidia;o__Cytophagales;f__Cyclobacteriaceae;g__;s__
8_1_Jan_SF_Bin89_scaffold_5800_c1_5913-7157_1	Sqr III	8_1_Jan_SF_Bin89	d__Bacteria;p__Bacteroidota;c__Bacteroidia;o__Cytophagales;f__Cyclobacteriaceae;g__;s__
8_1_Jan_SF_Bin6_scaffold_3958_c1_3759-5012_1	Sqr II	8_1_Jan_SF_Bin6	d__Bacteria;p__Bacteroidota;c__Bacteroidia;o__Flavobacteriales;f__Flavobacteriaceae;g__Aureibaculum;s__
8_1_Jan_SF_Bin51_scaffold_19993_c1_533-1951_1	Sqr II	8_1_Jan_SF_Bin51	d__Bacteria;p__Campylobacterota;c__Campylobacteria;o__Campylobacterales;f__Sulfurimonadaceae;g__;s__
8_1_Jan_SF_Bin13_scaffold_3474_c1_6462-7619_1	Sqr II	8_1_Jan_SF_Bin13	d__Bacteria;p__Nitrospirota;c__Thermodesulfovibrionia;o__Thermodesulfovibrionales;f__SM23-35;g__VGWZ01;s__
8_1_Jan_SF_Bin13_scaffold_3474_c1_7699-8802_1	Sqr II	8_1_Jan_SF_Bin13	d__Bacteria;p__Nitrospirota;c__Thermodesulfovibrionia;o__Thermodesulfovibrionales;f__SM23-35;g__VGWZ01;s__
8_1_Jan_SF_Bin88_scaffold_87691_c1_782-1516_1	Sqr I	8_1_Jan_SF_Bin88	d__Bacteria;p__Proteobacteria;c__Alphaproteobacteria;o__Rhodobacterales;f__Rhodobacteraceae;g__Albidovulum;s__
8_1_Jan_SF_Bin18_scaffold_6558_c1_3998-5137_1	Sqr III	8_1_Jan_SF_Bin18	d__Bacteria;p__Proteobacteria;c__Alphaproteobacteria;o__Rhodospirillales;f__Magnetovibrionaceae;g__;s__
8_1_Jan_SF_Bin93_scaffold_6899_c1_512-2116_1	Sqr II	8_1_Jan_SF_Bin93	d__Bacteria;p__Proteobacteria;c__Gammaproteobacteria;o__Burkholderiales;f__Nitrosomonadaceae;g__Nitrosomonas;s__
8_1_Jan_SF_Bin17_scaffold_10449_c1_4225-5412_1	Sqr I	8_1_Jan_SF_Bin17	d__Bacteria;p__Proteobacteria;c__Gammaproteobacteria;o__JABURT01;f__JABURT01;g__JABURT01;s__
8_1_Jan_SF_Bin31_scaffold_230_c1_2168-3439_1	Sqr I	8_1_Jan_SF_Bin31	d__Bacteria;p__Proteobacteria;c__Gammaproteobacteria;o__Nitrosococcales;f__Methylophagaceae;g__GCA-002733105;s__
8_1_Jan_SF_Bin65_scaffold_468_c1_12880-14151_1	Sqr I	8_1_Jan_SF_Bin65	d__Bacteria;p__Proteobacteria;c__Gammaproteobacteria;o__SZUA-229;f__SZUA-229;g__;s__
8_1_Jan_SF_Bin56_scaffold_334_c1_2137-3408_1	Sqr I	8_1_Jan_SF_Bin56	d__Bacteria;p__Proteobacteria;c__Gammaproteobacteria;o__SZUA-229;f__SZUA-229;g__SZUA-116;s__
8_1_Jan_SF_Bin39_scaffold_7008_c1_2771-3904_1	Sqr III	8_1_Jan_SF_Bin39	d__Bacteria;p__Proteobacteria;c__Gammaproteobacteria;o__UBA6429;f__UBA6429;g__;s__
8_1_Jan_SF_Bin85_scaffold_863_c1_12731-14008_1	Sqr I	8_1_Jan_SF_Bin85	d__Bacteria;p__Proteobacteria;c__Gammaproteobacteria;o__Woeseiales;f__Woeseiaceae;g__UBA1847;s__
8_1_July_SF_Bin52_scaffold_45732_c1_470-1726_1	Sqr III	8_1_July_SF_Bin52	d__Bacteria;p__Actinobacteriota;c__Acidimicrobiia;o__Acidimicrobiales;f__SZUA-35;g__CADEDH01;s__
8_1_July_SF_Bin47_scaffold_4715_c1_1-681_1	Sqr III	8_1_July_SF_Bin47	d__Bacteria;p__Actinobacteriota;c__Acidimicrobiia;o__UBA5794;f__JAENVV01;g__JAENVV01;s__
8_1_July_SF_Bin50_scaffold_13790_c1_1-717_1	Sqr III	8_1_July_SF_Bin50	d__Bacteria;p__Chloroflexota;c__Anaerolineae;o__Anaerolineales;f__UBA11579;g__;s__
8_1_July_SF_Bin50_scaffold_24882_c1_2-529_1	Sqr III	8_1_July_SF_Bin50	d__Bacteria;p__Chloroflexota;c__Anaerolineae;o__Anaerolineales;f__UBA11579;g__;s__
8_1_July_SF_Bin41_scaffold_27659_c1_2-877_1	Sqr III	8_1_July_SF_Bin41	d__Bacteria;p__Myxococcota;c__Polyangia;o__Polyangiales;f__SG8-38;g__;s__
8_1_July_SF_Bin48_scaffold_1148_c1_11084-12295_1	Sqr I	8_1_July_SF_Bin48	d__Bacteria;p__Nitrospinota;c__UBA7883;o__UBA7883;f__UBA7883;g__;s__
8_1_July_SF_Bin31_scaffold_4585_c1_5299-6474_1	Sqr I	8_1_July_SF_Bin31	d__Bacteria;p__Proteobacteria;c__Alphaproteobacteria;o__Rhodobacterales;f__Rhodobacteraceae;g__Albidovulum;s__
8_1_July_SF_Bin3_scaffold_13541_c1_3684-4133_1	Sqr III	8_1_July_SF_Bin3	d__Bacteria;p__Proteobacteria;c__Alphaproteobacteria;o__UBA8366;f__JADFVY01;g__JADFVY01;s__
8_1_July_SF_Bin40_scaffold_10118_c1_2811-4082_1	Sqr I	8_1_July_SF_Bin40	d__Bacteria;p__Proteobacteria;c__Gammaproteobacteria;o__SZUA-229;f__SZUA-229;g__;s__
8_1_July_SF_Bin40_scaffold_2726_c1_7372-8646_1	Sqr I	8_1_July_SF_Bin40	d__Bacteria;p__Proteobacteria;c__Gammaproteobacteria;o__SZUA-229;f__SZUA-229;g__;s__
8_1_July_SF_Bin54_scaffold_266_c1_22504-23778_1	Sqr I	8_1_July_SF_Bin54	d__Bacteria;p__Proteobacteria;c__Gammaproteobacteria;o__SZUA-229;f__SZUA-229;g__;s__
8_1_July_SF_Bin66_scaffold_52_c1_17204-18475_1	Sqr I	8_1_July_SF_Bin66	d__Bacteria;p__Proteobacteria;c__Gammaproteobacteria;o__SZUA-229;f__SZUA-229;g__SZUA-116;s__
8_1_July_SF_Bin66_scaffold_80_c1_10359-11636_1	Sqr I	8_1_July_SF_Bin66	d__Bacteria;p__Proteobacteria;c__Gammaproteobacteria;o__SZUA-229;f__SZUA-229;g__SZUA-116;s__
8_1_July_SF_Bin57_scaffold_42076_c1_1730-2116_1	Sqr I	8_1_July_SF_Bin57	d__Bacteria;p__Proteobacteria;c__Gammaproteobacteria;o__UBA6429;f__UBA6429;g__;s__
8_1_July_SF_Bin57_scaffold_9034_c1_3-1037_1	Sqr I	8_1_July_SF_Bin57	d__Bacteria;p__Proteobacteria;c__Gammaproteobacteria;o__UBA6429;f__UBA6429;g__;s__
8_1_July_SF_Bin46_scaffold_11246_c1_1939-3222_1	Sqr I	8_1_July_SF_Bin46	d__Bacteria;p__Proteobacteria;c__Gammaproteobacteria;o__Woeseiales;f__Woeseiaceae;g__IDS-8;s__
8_1_July_SF_Bin65_scaffold_39228_c1_1201-2205_1	Sqr I	8_1_July_SF_Bin65	d__Bacteria;p__Proteobacteria;c__Gammaproteobacteria;o__Woeseiales;f__Woeseiaceae;g__UBA1847;s__
8_1_July_SF_Bin69_scaffold_492_c1_11953-13230_1	Sqr I	8_1_July_SF_Bin69	d__Bacteria;p__Proteobacteria;c__Gammaproteobacteria;o__Woeseiales;f__Woeseiaceae;g__UBA1847;s__
8_1_May_SF_Bin11_scaffold_183224_c1_159-1370_1	Sqr I	8_1_May_SF_Bin11	d__Bacteria;p__Nitrospinota;c__UBA7883;o__UBA7883;f__UBA7883;g__;s__
8_1_May_SF_Bin16_scaffold_166305_c1_526-1761_1	Sqr III	8_1_May_SF_Bin16	d__Bacteria;p__Nitrospirota;c__Nitrospiria;o__Nitrospirales;f__Nitrospiraceae;g__Nitrospira_F;s__
8_1_Oct_SF_Bin109_scaffold_82754_c1_1-804_1	Sqr II	8_1_Oct_SF_Bin109	d__Bacteria;p__Bacteroidota;c__Bacteroidia;o__Cytophagales;f__Cyclobacteriaceae;g__;s__
8_1_Oct_SF_Bin11_scaffold_76459_c1_3-668_1	Sqr II	8_1_Oct_SF_Bin11	d__Bacteria;p__Bacteroidota;c__Bacteroidia;o__Cytophagales;f__Cyclobacteriaceae;g__;s__
8_1_Oct_SF_Bin17_scaffold_68061_c1_2-676_1	Sqr II	8_1_Oct_SF_Bin17	d__Bacteria;p__Bdellovibrionota;c__Bacteriovoracia;o__Bacteriovoracales;f__Bacteriovoracaceae;g__;s__
8_1_Oct_SF_Bin61_scaffold_325_c1_38942-40174_1	Sqr III	8_1_Oct_SF_Bin61	d__Bacteria;p__Gemmatimonadota;c__Gemmatimonadetes;o__Longimicrobiales;f__UBA6960;g__;s__
8_1_Oct_SF_Bin19_scaffold_202_c1_46308-47495_1	Sqr II	8_1_Oct_SF_Bin19	d__Bacteria;p__Myxococcota;c__Polyangia;o__Polyangiales;f__JAFGIB01;g__;s__
8_1_Oct_SF_Bin69_scaffold_622_c1_12825-14030_1	Sqr II	8_1_Oct_SF_Bin69	d__Bacteria;p__Nitrospinota;c__Nitrospinia;o__Nitrospinales;f__Nitrospinaceae;g__SZUA-226;s__
8_1_Oct_SF_Bin59_scaffold_16825_c1_2205-3416_1	Sqr I	8_1_Oct_SF_Bin59	d__Bacteria;p__Nitrospinota;c__UBA7883;o__UBA7883;f__UBA7883;g__;s__
8_1_Oct_SF_Bin79_scaffold_24682_c1_1094-2251_1	Sqr II	8_1_Oct_SF_Bin79	d__Bacteria;p__Nitrospirota;c__Thermodesulfovibrionia;o__Thermodesulfovibrionales;f__SM23-35;g__VGWZ01;s__
8_1_Oct_SF_Bin79_scaffold_24682_c1_2331-3434_1	Sqr II	8_1_Oct_SF_Bin79	d__Bacteria;p__Nitrospirota;c__Thermodesulfovibrionia;o__Thermodesulfovibrionales;f__SM23-35;g__VGWZ01;s__
8_1_Oct_SF_Bin68_scaffold_39359_c1_652-1791_1	Sqr III	8_1_Oct_SF_Bin68	d__Bacteria;p__Proteobacteria;c__Alphaproteobacteria;o__Rhodospirillales;f__2-02-FULL-58-16;g__;s__
8_1_Oct_SF_Bin102_scaffold_16_c1_16274-17548_1	Sqr I	8_1_Oct_SF_Bin102	d__Bacteria;p__Proteobacteria;c__Gammaproteobacteria;o__Acidiferrobacterales;f__SZUA-150;g__;s__
8_1_Oct_SF_Bin56_scaffold_13512_c1_1017-2294_1	Sqr I	8_1_Oct_SF_Bin56	d__Bacteria;p__Proteobacteria;c__Gammaproteobacteria;o__Burkholderiales;f__Burkholderiaceae;g__Hylemonella;s__
8_1_Oct_SF_Bin105_scaffold_7294_c1_1760-3031_1	Sqr I	8_1_Oct_SF_Bin105	d__Bacteria;p__Proteobacteria;c__Gammaproteobacteria;o__Nitrosococcales;f__Methylophagaceae;g__GCA-002733105;s__
8_1_Oct_SF_Bin28_scaffold_3945_c1_4405-5679_1	Sqr I	8_1_Oct_SF_Bin28	d__Bacteria;p__Proteobacteria;c__Gammaproteobacteria;o__SZUA-229;f__SZUA-229;g__;s__
8_1_Oct_SF_Bin95_scaffold_486_c1_6294-7427_1	Sqr VI	8_1_Oct_SF_Bin95	d__Bacteria;p__Proteobacteria;c__Gammaproteobacteria;o__Thiohalomonadales;f__Thiohalomonadaceae;g__;s__
8_1_Oct_SF_Bin111_scaffold_26605_c1_899-2170_1	Sqr I	8_1_Oct_SF_Bin111	d__Bacteria;p__Proteobacteria;c__Gammaproteobacteria;o__UBA6429;f__UBA6429;g__;s__
8_1_Oct_SF_Bin25_scaffold_67_c1_103359-104570_1	Sqr IV	8_1_Oct_SF_Bin25	d__Bacteria;p__Spirochaetota;c__Leptospirae;o__Turneriellales;f__J094;g__;s__

## Sheet: NiFeHyd
NiFe Hydrogenase	Group	MAG	GTDBtk
4_1_July_SF_Bin26_4_1_July_bin_26_scaffold_19797_c1_4	NiFe_Group_3c	4_1_July_SF_Bin26	d__Archaea;p__Thermoplasmatota;c__Thermoplasmata;o__UBA10834;f__DTMW01;g__DTMW01;s__
13_Jan_SF_Bin61_scaffold_22_c1_53	NiFe_Group_3c	13_Jan_SF_Bin61	d__Archaea;p__Thermoplasmatota;c__Thermoplasmata;o__UBA10834;f__UBA10834;g__UBA10834;s__
8_1_Oct_SF_Bin93_scaffold_11339_c1_2	NiFe_Group_3c	8_1_Oct_SF_Bin93	d__Archaea;p__Thermoproteota;c__Bathyarchaeia;o__B26-1;f__;g__;s__
8_1_Oct_SF_Bin93_scaffold_4508_c1_11	NiFe_Group_3c	8_1_Oct_SF_Bin93	d__Archaea;p__Thermoproteota;c__Bathyarchaeia;o__B26-1;f__;g__;s__
8_1_Jan_SF_Bin81_scaffold_18757_c1_3	NiFe_Group_3c	8_1_Jan_SF_Bin81	d__Archaea;p__Thermoproteota;c__Bathyarchaeia;o__B26-1;f__B26-1;g__;s__
8_1_Jan_SF_Bin81_scaffold_42129_c1_4	NiFe_Group_3c	8_1_Jan_SF_Bin81	d__Archaea;p__Thermoproteota;c__Bathyarchaeia;o__B26-1;f__B26-1;g__;s__
8_1_Oct_SF_Bin36_scaffold_14109_c1_2	NiFe_Group_3c	8_1_Oct_SF_Bin36	d__Archaea;p__Thermoproteota;c__Bathyarchaeia;o__B26-1;f__B26-1;g__;s__
8_1_Jan_SF_Bin48_scaffold_10318_c1_5	NiFe_Group_3c	8_1_Jan_SF_Bin48	d__Archaea;p__Thermoproteota;c__Bathyarchaeia;o__B26-1;f__BA1;g__;s__
8_1_Jan_SF_Bin48_scaffold_450_c1_19	NiFe_Group_3c	8_1_Jan_SF_Bin48	d__Archaea;p__Thermoproteota;c__Bathyarchaeia;o__B26-1;f__BA1;g__;s__
8_1_Jan_SF_Bin52_scaffold_15122_c1_4	NiFe_Group_3c	8_1_Jan_SF_Bin52	d__Archaea;p__Thermoproteota;c__Bathyarchaeia;o__B26-1;f__BA1;g__;s__
8_1_Jan_SF_Bin74_scaffold_2158_c1_2	NiFe_Group_3c	8_1_Jan_SF_Bin74	d__Archaea;p__Thermoproteota;c__Bathyarchaeia;o__B26-1;f__BA1;g__;s__
8_1_Jan_SF_Bin74_scaffold_2158_c1_8	NiFe_Group_3d	8_1_Jan_SF_Bin74	d__Archaea;p__Thermoproteota;c__Bathyarchaeia;o__B26-1;f__BA1;g__;s__
8_1_July_SF_Bin33_scaffold_2046_c1_11	NiFe_Group_3c	8_1_July_SF_Bin33	d__Archaea;p__Thermoproteota;c__Bathyarchaeia;o__B26-1;f__BA1;g__;s__
8_1_July_SF_Bin33_scaffold_2046_c1_5	NiFe_Group_3d	8_1_July_SF_Bin33	d__Archaea;p__Thermoproteota;c__Bathyarchaeia;o__B26-1;f__BA1;g__;s__
8_1_Oct_SF_Bin29_scaffold_985_c1_23	NiFe_Group_3c	8_1_Oct_SF_Bin29	d__Archaea;p__Thermoproteota;c__Bathyarchaeia;o__B26-1;f__BA1;g__;s__
8_1_Oct_SF_Bin35_scaffold_4362_c1_2	NiFe_Group_3c	8_1_Oct_SF_Bin35	d__Archaea;p__Thermoproteota;c__Bathyarchaeia;o__B26-1;f__BA1;g__;s__
8_1_Oct_SF_Bin35_scaffold_4362_c1_8	NiFe_Group_3d	8_1_Oct_SF_Bin35	d__Archaea;p__Thermoproteota;c__Bathyarchaeia;o__B26-1;f__BA1;g__;s__
8_1_Oct_SF_Bin81_scaffold_11109_c1_4	NiFe_Group_3c	8_1_Oct_SF_Bin81	d__Archaea;p__Thermoproteota;c__Bathyarchaeia;o__B26-1;f__BA1;g__;s__
8_1_Oct_SF_Bin81_scaffold_12059_c1_5	NiFe_Group_3c	8_1_Oct_SF_Bin81	d__Archaea;p__Thermoproteota;c__Bathyarchaeia;o__B26-1;f__BA1;g__;s__
8_1_Oct_SF_Bin41_scaffold_16149_c1_5	NiFe_Group_3c	8_1_Oct_SF_Bin41	d__Archaea;p__Thermoproteota;c__Bathyarchaeia;o__B26-1;f__BA1;g__BIN-L-1;s__
4_1_July_SF_Bin41_4_1_July_bin_41_scaffold_6201_c1_1	NiFe_Group_3c	4_1_July_SF_Bin41	d__Archaea;p__Thermoproteota;c__Bathyarchaeia;o__B26-1;f__BA1;g__Kmv02;s__
8_1_Jan_SF_Bin55_scaffold_1354_c1_4	NiFe_Group_3c	8_1_Jan_SF_Bin55	d__Archaea;p__Thermoproteota;c__Bathyarchaeia;o__B26-1;f__BA1;g__Kmv02;s__
8_1_Jan_SF_Bin55_scaffold_25781_c1_1	NiFe_Group_3c	8_1_Jan_SF_Bin55	d__Archaea;p__Thermoproteota;c__Bathyarchaeia;o__B26-1;f__BA1;g__Kmv02;s__
8_1_Jan_SF_Bin71_scaffold_588_c2_4	NiFe_Group_3c	8_1_Jan_SF_Bin71	d__Archaea;p__Thermoproteota;c__Bathyarchaeia;o__B26-1;f__BA1;g__Kmv02;s__
8_1_July_SF_Bin73_scaffold_2917_c1_1	NiFe_Group_3c	8_1_July_SF_Bin73	d__Archaea;p__Thermoproteota;c__Bathyarchaeia;o__B26-1;f__BA1;g__Kmv02;s__
8_1_July_SF_Bin73_scaffold_37830_c1_1	NiFe_Group_3c	8_1_July_SF_Bin73	d__Archaea;p__Thermoproteota;c__Bathyarchaeia;o__B26-1;f__BA1;g__Kmv02;s__
8_1_May_SF_Bin8_scaffold_144_c1_7	NiFe_Group_3c	8_1_May_SF_Bin8	d__Archaea;p__Thermoproteota;c__Bathyarchaeia;o__B26-1;f__BA1;g__Kmv02;s__
8_1_Oct_SF_Bin52_scaffold_7579_c1_8	NiFe_Group_3c	8_1_Oct_SF_Bin52	d__Archaea;p__Thermoproteota;c__Bathyarchaeia;o__B26-1;f__BA1;g__Kmv02;s__
8_1_Oct_SF_Bin53_scaffold_1499_c1_5	NiFe_Group_3c	8_1_Oct_SF_Bin53	d__Archaea;p__Thermoproteota;c__Bathyarchaeia;o__B26-1;f__BA1;g__Kmv02;s__
8_1_Oct_SF_Bin53_scaffold_33941_c1_4	NiFe_Group_3c	8_1_Oct_SF_Bin53	d__Archaea;p__Thermoproteota;c__Bathyarchaeia;o__B26-1;f__BA1;g__Kmv02;s__
8_1_Jan_SF_Bin101_scaffold_1021_c1_14	NiFe_Group_3c	8_1_Jan_SF_Bin101	d__Archaea;p__Thermoproteota;c__Bathyarchaeia;o__B26-1;f__BA1;g__SOJZ01;s__
8_1_Jan_SF_Bin101_scaffold_11533_c1_1	NiFe_Group_3c	8_1_Jan_SF_Bin101	d__Archaea;p__Thermoproteota;c__Bathyarchaeia;o__B26-1;f__BA1;g__SOJZ01;s__
8_1_Oct_SF_Bin103_scaffold_14851_c1_5	NiFe_Group_3c	8_1_Oct_SF_Bin103	d__Archaea;p__Thermoproteota;c__Bathyarchaeia;o__B26-1;f__BA1;g__SOJZ01;s__
8_1_Oct_SF_Bin103_scaffold_798_c1_10	NiFe_Group_3c	8_1_Oct_SF_Bin103	d__Archaea;p__Thermoproteota;c__Bathyarchaeia;o__B26-1;f__BA1;g__SOJZ01;s__
8_1_Jan_SF_Bin46_scaffold_1300_c1_1	NiFe_Group_3c	8_1_Jan_SF_Bin46	d__Archaea;p__Thermoproteota;c__Bathyarchaeia;o__B26-1;f__SOJC01;g__;s__
8_1_Jan_SF_Bin46_scaffold_543_c1_35	NiFe_Group_3c	8_1_Jan_SF_Bin46	d__Archaea;p__Thermoproteota;c__Bathyarchaeia;o__B26-1;f__SOJC01;g__;s__
8_1_July_SF_Bin42_scaffold_21173_c1_4	NiFe_Group_3c	8_1_July_SF_Bin42	d__Archaea;p__Thermoproteota;c__Bathyarchaeia;o__B26-1;f__SOJC01;g__;s__
8_1_July_SF_Bin42_scaffold_6524_c1_5	NiFe_Group_3c	8_1_July_SF_Bin42	d__Archaea;p__Thermoproteota;c__Bathyarchaeia;o__B26-1;f__SOJC01;g__;s__
8_1_Jan_SF_Bin50_scaffold_10359_c1_1	NiFe_Group_3c	8_1_Jan_SF_Bin50	d__Archaea;p__Thermoproteota;c__Bathyarchaeia;o__B26-1;f__UBA233;g__;s__
8_1_Jan_SF_Bin96_scaffold_138_c1_37	NiFe_Group_3c	8_1_Jan_SF_Bin96	d__Archaea;p__Thermoproteota;c__Bathyarchaeia;o__B26-1;f__UBA233;g__;s__
8_1_Jan_SF_Bin96_scaffold_509_c1_8	NiFe_Group_3c	8_1_Jan_SF_Bin96	d__Archaea;p__Thermoproteota;c__Bathyarchaeia;o__B26-1;f__UBA233;g__;s__
8_1_Jan_SF_Bin96_scaffold_75_c1_109	NiFe_Group_3c	8_1_Jan_SF_Bin96	d__Archaea;p__Thermoproteota;c__Bathyarchaeia;o__B26-1;f__UBA233;g__;s__
8_1_Oct_SF_Bin71_scaffold_376_c1_12	NiFe_Group_3c	8_1_Oct_SF_Bin71	d__Archaea;p__Thermoproteota;c__Bathyarchaeia;o__B26-1;f__UBA233;g__;s__
8_1_Oct_SF_Bin96_scaffold_12373_c1_9	NiFe_Group_3c	8_1_Oct_SF_Bin96	d__Archaea;p__Thermoproteota;c__Bathyarchaeia;o__B26-1;f__UBA233;g__;s__
8_1_Oct_SF_Bin96_scaffold_915_c2_9	NiFe_Group_3c	8_1_Oct_SF_Bin96	d__Archaea;p__Thermoproteota;c__Bathyarchaeia;o__B26-1;f__UBA233;g__;s__
8_1_Oct_SF_Bin80_scaffold_63836_c1_2	NiFe_Group_3c	8_1_Oct_SF_Bin80	d__Archaea;p__Thermoproteota;c__Bathyarchaeia;o__RBG-16-48-13;f__;g__;s__
8_1_Jan_SF_Bin12_scaffold_2334_c1_3	NiFe_Group_3c	8_1_Jan_SF_Bin12	d__Archaea;p__Thermoproteota;c__Bathyarchaeia;o__TCS64;f__TCS64;g__;s__
8_1_Oct_SF_Bin84_scaffold_1682_c1_6	NiFe_Group_3c	8_1_Oct_SF_Bin84	d__Archaea;p__Thermoproteota;c__Bathyarchaeia;o__TCS64;f__TCS64;g__;s__
8_1_Oct_SF_Bin33_scaffold_19718_c1_2	NiFe_Group_3c	8_1_Oct_SF_Bin33	d__Archaea;p__Thermoproteota;c__Nitrososphaeria_A;o__Caldarchaeales;f__;g__;s__
4_1_July_SF_Bin33_4_1_July_bin_33_scaffold_668_c1_12	NiFe_Group_3c	4_1_July_SF_Bin33	d__Bacteria;p__Acidobacteriota;c__Aminicenantia;o__Aminicenantales;f__Aminicenantaceae;g__;s__
4_1_July_SF_Bin33_4_1_July_bin_33_scaffold_682_c1_20	NiFe_Group_3c	4_1_July_SF_Bin33	d__Bacteria;p__Acidobacteriota;c__Aminicenantia;o__Aminicenantales;f__Aminicenantaceae;g__;s__
8_1_Jan_SF_Bin35_scaffold_12341_c1_3	NiFe_Group_3c	8_1_Jan_SF_Bin35	d__Bacteria;p__Acidobacteriota;c__Aminicenantia;o__Aminicenantales;f__Aminicenantaceae;g__;s__
8_1_Jan_SF_Bin35_scaffold_35315_c1_1	NiFe_Group_3c	8_1_Jan_SF_Bin35	d__Bacteria;p__Acidobacteriota;c__Aminicenantia;o__Aminicenantales;f__Aminicenantaceae;g__;s__
8_1_Oct_SF_Bin67_scaffold_38346_c1_1	NiFe_Group_3c	8_1_Oct_SF_Bin67	d__Bacteria;p__Acidobacteriota;c__Aminicenantia;o__Aminicenantales;f__Aminicenantaceae;g__;s__
8_1_Oct_SF_Bin67_scaffold_4965_c1_1	NiFe_Group_3c	8_1_Oct_SF_Bin67	d__Bacteria;p__Acidobacteriota;c__Aminicenantia;o__Aminicenantales;f__Aminicenantaceae;g__;s__
8_1_Oct_SF_Bin67_scaffold_875_c1_20	NiFe_Group_3c	8_1_Oct_SF_Bin67	d__Bacteria;p__Acidobacteriota;c__Aminicenantia;o__Aminicenantales;f__Aminicenantaceae;g__;s__
8_1_Jan_SF_Bin49_scaffold_1640_c1_2	NiFe_Group_3c	8_1_Jan_SF_Bin49	d__Bacteria;p__Acidobacteriota;c__Aminicenantia;o__Aminicenantales;f__Aminicenantaceae;g__SOIA01;s__
8_1_Oct_SF_Bin32_scaffold_41059_c1_2	NiFe_Group_3c	8_1_Oct_SF_Bin32	d__Bacteria;p__Acidobacteriota;c__Aminicenantia;o__Aminicenantales;f__Aminicenantaceae;g__SOIA01;s__
8_1_Oct_SF_Bin32_scaffold_53903_c1_1	NiFe_Group_3c	8_1_Oct_SF_Bin32	d__Bacteria;p__Acidobacteriota;c__Aminicenantia;o__Aminicenantales;f__Aminicenantaceae;g__SOIA01;s__
4_1_July_SF_Bin30_4_1_July_bin_30_scaffold_10414_c1_1	NiFe_Group_4g	4_1_July_SF_Bin30	d__Bacteria;p__Acidobacteriota;c__Aminicenantia;o__Aminicenantales;f__RBG-16-66-30;g__;s__
4_1_July_SF_Bin30_4_1_July_bin_30_scaffold_5878_c1_10	NiFe_Group_4g	4_1_July_SF_Bin30	d__Bacteria;p__Acidobacteriota;c__Aminicenantia;o__Aminicenantales;f__RBG-16-66-30;g__;s__
4_1_July_SF_Bin61_4_1_July_bin_61_scaffold_7695_c1_1	NiFe_Group_3c	4_1_July_SF_Bin61	d__Bacteria;p__Acidobacteriota;c__Aminicenantia;o__Aminicenantales;f__UBA8522;g__UBA8522;s__
8_1_Jan_SF_Bin62_scaffold_41293_c1_2	NiFe_Group_3c	8_1_Jan_SF_Bin62	d__Bacteria;p__Acidobacteriota;c__B3-B38;o__B3-B38;f__B3-B38;g__Guanabacterium;s__
8_1_Oct_SF_Bin20_scaffold_4413_c1_4	NiFe_Group_3c	8_1_Oct_SF_Bin20	d__Bacteria;p__Acidobacteriota;c__B3-B38;o__B3-B38;f__B3-B38;g__Guanabacterium;s__
13_July_SF_Bin26_scaffold_10967_c1_6	NiFe_Group_1d	13_July_SF_Bin26	d__Bacteria;p__Acidobacteriota;c__Blastocatellia;o__Pyrinomonadales;f__Pyrinomonadaceae;g__QQUY01;s__
13_July_SF_Bin26_scaffold_3496_c1_5	NiFe_Group_3b	13_July_SF_Bin26	d__Bacteria;p__Acidobacteriota;c__Blastocatellia;o__Pyrinomonadales;f__Pyrinomonadaceae;g__QQUY01;s__
13_May_SF_Bin9_scaffold_3315_c1_5	NiFe_Group_3b	13_May_SF_Bin9	d__Bacteria;p__Acidobacteriota;c__Blastocatellia;o__Pyrinomonadales;f__Pyrinomonadaceae;g__QQUY01;s__
13_May_SF_Bin9_scaffold_9684_c1_2	NiFe_Group_1d	13_May_SF_Bin9	d__Bacteria;p__Acidobacteriota;c__Blastocatellia;o__Pyrinomonadales;f__Pyrinomonadaceae;g__QQUY01;s__
13_May_SF_Bin61_scaffold_4636_c1_4	NiFe_Group_3c	13_May_SF_Bin61	d__Bacteria;p__Acidobacteriota;c__Mor1;o__J045;f__J045;g__;s__
21_May_SF_Bin25_scaffold_15258_c1_1	NiFe_Group_1c	21_May_SF_Bin25	d__Bacteria;p__Acidobacteriota;c__Thermoanaerobaculia;o__Thermoanaerobaculales;f__FEB-10;g__JACXWA01;s__
13_July_SF_Bin37_scaffold_400_c1_26	NiFe_Group_1f	13_July_SF_Bin37	d__Bacteria;p__Acidobacteriota;c__Thermoanaerobaculia;o__UBA5704;f__UBA5704;g__;s__
13_May_SF_Bin12_scaffold_4829_c1_3	NiFe_Group_1f	13_May_SF_Bin12	d__Bacteria;p__Acidobacteriota;c__Thermoanaerobaculia;o__UBA5704;f__UBA5704;g__;s__
13_May_SF_Bin86_scaffold_663_c1_25	NiFe_Group_1f	13_May_SF_Bin86	d__Bacteria;p__Acidobacteriota;c__Thermoanaerobaculia;o__UBA5704;f__UBA5704;g__;s__
21_Jan_SF_Bin62_scaffold_2468_c1_4	NiFe_Group_1f	21_Jan_SF_Bin62	d__Bacteria;p__Acidobacteriota;c__Thermoanaerobaculia;o__UBA5704;f__UBA5704;g__;s__
4_1_Jan_SF_Bin21_4_1_Jan_bin_21_scaffold_33212_c1_2	NiFe_Group_3b	4_1_Jan_SF_Bin21	d__Bacteria;p__Acidobacteriota;c__Vicinamibacteria;o__Vicinamibacterales;f__UBA2999;g__VFZN01;s__
21_Jan_SF_Bin67_scaffold_1299_c1_1	NiFe_Group_3b	21_Jan_SF_Bin67	d__Bacteria;p__Actinobacteriota;c__Acidimicrobiia;o__Acidimicrobiales;f__;g__;s__
21_Jan_SF_Bin67_scaffold_3285_c1_13	NiFe_Group_3b	21_Jan_SF_Bin67	d__Bacteria;p__Actinobacteriota;c__Acidimicrobiia;o__Acidimicrobiales;f__;g__;s__
4_1_Jan_SF_Bin58_4_1_Jan_bin_58_scaffold_2067_c1_8	NiFe_Group_3b	4_1_Jan_SF_Bin58	d__Bacteria;p__Actinobacteriota;c__Acidimicrobiia;o__Acidimicrobiales;f__CAIXPF01;g__WHTX01;s__
21_Jan_SF_Bin53_scaffold_26091_c1_3	NiFe_Group_3b	21_Jan_SF_Bin53	d__Bacteria;p__Actinobacteriota;c__Acidimicrobiia;o__Acidimicrobiales;f__SHLQ01;g__;s__
4_1_Jan_SF_Bin55_4_1_Jan_bin_55_scaffold_22819_c1_3	NiFe_Group_3b	4_1_Jan_SF_Bin55	d__Bacteria;p__Actinobacteriota;c__Acidimicrobiia;o__Acidimicrobiales;f__SHLQ01;g__JABDJW01;s__
13_May_SF_Bin57_scaffold_2311_c1_2	NiFe_Group_3d	13_May_SF_Bin57	d__Bacteria;p__Actinobacteriota;c__Acidimicrobiia;o__Acidimicrobiales;f__SZUA-35;g__CADEDH01;s__
21_Jan_SF_Bin50_scaffold_46617_c1_5	NiFe_Group_3b	21_Jan_SF_Bin50	d__Bacteria;p__Actinobacteriota;c__Acidimicrobiia;o__Acidimicrobiales;f__SZUA-35;g__CADEDH01;s__
4_1_May_SF_Bin1_scaffold_7734_c1_6	NiFe_Group_3b	4_1_May_SF_Bin1	d__Bacteria;p__Actinobacteriota;c__Acidimicrobiia;o__Acidimicrobiales;f__SZUA-35;g__CADEDH01;s__
13_July_SF_Bin48_scaffold_23694_c1_4	NiFe_Group_3b	13_July_SF_Bin48	d__Bacteria;p__Actinobacteriota;c__Acidimicrobiia;o__UBA5794;f__;g__;s__
13_May_SF_Bin73_scaffold_20789_c1_7	NiFe_Group_3b	13_May_SF_Bin73	d__Bacteria;p__Actinobacteriota;c__Acidimicrobiia;o__UBA5794;f__;g__;s__
21_Jan_SF_Bin8_scaffold_69803_c1_2	NiFe_Group_3b	21_Jan_SF_Bin8	d__Bacteria;p__Actinobacteriota;c__Acidimicrobiia;o__UBA5794;f__;g__;s__
4_1_Jan_SF_Bin7_4_1_Jan_bin_7_scaffold_17077_c1_2	NiFe_Group_3b	4_1_Jan_SF_Bin7	d__Bacteria;p__Actinobacteriota;c__Acidimicrobiia;o__UBA5794;f__;g__;s__
4_1_May_SF_Bin47_scaffold_11471_c1_5	NiFe_Group_3b	4_1_May_SF_Bin47	d__Bacteria;p__Actinobacteriota;c__Acidimicrobiia;o__UBA5794;f__;g__;s__
13_May_SF_Bin8_scaffold_6430_c1_1	NiFe_Group_1f	13_May_SF_Bin8	d__Bacteria;p__Actinobacteriota;c__Acidimicrobiia;o__UBA5794;f__SZUA-232;g__;s__
13_May_SF_Bin46_scaffold_4635_c1_9	NiFe_Group_3d	13_May_SF_Bin46	d__Bacteria;p__Actinobacteriota;c__Acidimicrobiia;o__UBA5794;f__ZC4RG35;g__;s__
24_May_SF_Bin5_scaffold_19910_c1_2	NiFe_Group_3b	24_May_SF_Bin5	d__Bacteria;p__Actinobacteriota;c__Actinomycetia;o__Nanopelagicales;f__;g__;s__
4_1_Jan_SF_Bin59_4_1_Jan_bin_59_scaffold_3626_c1_7	NiFe_Group_3b	4_1_Jan_SF_Bin59	d__Bacteria;p__Actinobacteriota;c__Actinomycetia;o__Nanopelagicales;f__;g__;s__
4_1_May_SF_Bin62_scaffold_24379_c1_2	NiFe_Group_3b	4_1_May_SF_Bin62	d__Bacteria;p__Actinobacteriota;c__Actinomycetia;o__Nanopelagicales;f__;g__;s__
4_1_Jan_SF_Bin61_4_1_Jan_bin_61_scaffold_14983_c1_3	NiFe_Group_3b	4_1_Jan_SF_Bin61	d__Bacteria;p__Actinobacteriota;c__Thermoleophilia;o__Gaiellales;f__Gaiellaceae;g__;s__
4_1_May_SF_Bin52_scaffold_2536_c1_10	NiFe_Group_3b	4_1_May_SF_Bin52	d__Bacteria;p__Actinobacteriota;c__Thermoleophilia;o__Gaiellales;f__Gaiellaceae;g__Gaiella;s__
4_1_Oct_SF_Bin14_scaffold_2680_c1_9	NiFe_Group_3b	4_1_Oct_SF_Bin14	d__Bacteria;p__Actinobacteriota;c__Thermoleophilia;o__Gaiellales;f__Gaiellaceae;g__GMQP-bins7;s__
8_1_Jan_SF_Bin4_scaffold_13163_c1_5	NiFe_Group_1d	8_1_Jan_SF_Bin4	d__Bacteria;p__Bacteroidota;c__Bacteroidia;o__Cytophagales;f__Cyclobacteriaceae;g__;s__
8_1_Jan_SF_Bin40_scaffold_565_c1_12	NiFe_Group_1d	8_1_Jan_SF_Bin40	d__Bacteria;p__Bacteroidota;c__Bacteroidia;o__Cytophagales;f__Cyclobacteriaceae;g__;s__
8_1_Jan_SF_Bin42_scaffold_3223_c1_9	NiFe_Group_1d	8_1_Jan_SF_Bin42	d__Bacteria;p__Bacteroidota;c__Bacteroidia;o__Cytophagales;f__Cyclobacteriaceae;g__;s__
8_1_Jan_SF_Bin6_scaffold_48912_c1_2	NiFe_Group_1d	8_1_Jan_SF_Bin6	d__Bacteria;p__Bacteroidota;c__Bacteroidia;o__Flavobacteriales;f__Flavobacteriaceae;g__Aureibaculum;s__
13_Jan_SF_Bin2_scaffold_1022_c1_1	NiFe_Group_1d	13_Jan_SF_Bin2	d__Bacteria;p__Bacteroidota;c__Bacteroidia;o__Flavobacteriales;f__Flavobacteriaceae;g__QNYL01;s__
13_May_SF_Bin23_scaffold_16495_c1_3	NiFe_Group_1d	13_May_SF_Bin23	d__Bacteria;p__Bacteroidota;c__UBA10030;o__UBA10030;f__UBA6906;g__;s__
21_Jan_SF_Bin5_scaffold_12611_c1_5	NiFe_Group_3c	21_Jan_SF_Bin5	d__Bacteria;p__Chloroflexota;c__Anaerolineae;o__4572-78;f__J111;g__J095;s__
21_Jan_SF_Bin5_scaffold_30758_c1_4	NiFe_Group_3b	21_Jan_SF_Bin5	d__Bacteria;p__Chloroflexota;c__Anaerolineae;o__4572-78;f__J111;g__J095;s__
24_May_SF_Bin27_scaffold_300_c1_2	NiFe_Group_3c	24_May_SF_Bin27	d__Bacteria;p__Chloroflexota;c__Anaerolineae;o__Anaerolineales;f__UBA11579;g__;s__
8_1_July_SF_Bin50_scaffold_13457_c1_5	NiFe_Group_3c	8_1_July_SF_Bin50	d__Bacteria;p__Chloroflexota;c__Anaerolineae;o__Anaerolineales;f__UBA11579;g__;s__
8_1_Oct_SF_Bin13_scaffold_14669_c1_5	NiFe_Group_3c	8_1_Oct_SF_Bin13	d__Bacteria;p__Chloroflexota;c__Anaerolineae;o__Anaerolineales;f__UBA11579;g__JABJGH01;s__
4_1_July_SF_Bin35_4_1_July_bin_35_scaffold_26695_c1_1	NiFe_Group_1a	4_1_July_SF_Bin35	d__Bacteria;p__Chloroflexota;c__Anaerolineae;o__UBA7937;f__B3-Chlor;g__B3-Chlor;s__
4_1_July_SF_Bin35_4_1_July_bin_35_scaffold_6736_c1_6	NiFe_Group_1a	4_1_July_SF_Bin35	d__Bacteria;p__Chloroflexota;c__Anaerolineae;o__UBA7937;f__B3-Chlor;g__B3-Chlor;s__
8_1_Oct_SF_Bin42_scaffold_17174_c1_10	NiFe_Group_4d	8_1_Oct_SF_Bin42	d__Bacteria;p__Chloroflexota;c__Dehalococcoidia;o__Dehalococcoidales;f__E44-bin88;g__;s__
8_1_Oct_SF_Bin42_scaffold_23051_c1_5	NiFe_Group_4e	8_1_Oct_SF_Bin42	d__Bacteria;p__Chloroflexota;c__Dehalococcoidia;o__Dehalococcoidales;f__E44-bin88;g__;s__
8_1_Oct_SF_Bin42_scaffold_5270_c2_4	NiFe_Group_3b	8_1_Oct_SF_Bin42	d__Bacteria;p__Chloroflexota;c__Dehalococcoidia;o__Dehalococcoidales;f__E44-bin88;g__;s__
8_1_Oct_SF_Bin42_scaffold_64886_c1_2	NiFe_Group_1a	8_1_Oct_SF_Bin42	d__Bacteria;p__Chloroflexota;c__Dehalococcoidia;o__Dehalococcoidales;f__E44-bin88;g__;s__
8_1_Jan_SF_Bin41_scaffold_11880_c1_1	NiFe_Group_4d	8_1_Jan_SF_Bin41	d__Bacteria;p__Chloroflexota;c__Dehalococcoidia;o__GIF9;f__AB-539-J10;g__20-14-all-45-10;s__
8_1_Jan_SF_Bin41_scaffold_12944_c1_2	NiFe_Group_3b	8_1_Jan_SF_Bin41	d__Bacteria;p__Chloroflexota;c__Dehalococcoidia;o__GIF9;f__AB-539-J10;g__20-14-all-45-10;s__
8_1_Jan_SF_Bin41_scaffold_26803_c1_7	NiFe_Group_3c	8_1_Jan_SF_Bin41	d__Bacteria;p__Chloroflexota;c__Dehalococcoidia;o__GIF9;f__AB-539-J10;g__20-14-all-45-10;s__
8_1_Jan_SF_Bin41_scaffold_50310_c1_4	NiFe_Group_4d	8_1_Jan_SF_Bin41	d__Bacteria;p__Chloroflexota;c__Dehalococcoidia;o__GIF9;f__AB-539-J10;g__20-14-all-45-10;s__
8_1_Jan_SF_Bin41_scaffold_63665_c1_2	NiFe_Group_4g	8_1_Jan_SF_Bin41	d__Bacteria;p__Chloroflexota;c__Dehalococcoidia;o__GIF9;f__AB-539-J10;g__20-14-all-45-10;s__
8_1_Oct_SF_Bin82_scaffold_15065_c1_10	NiFe_Group_4d	8_1_Oct_SF_Bin82	d__Bacteria;p__Chloroflexota;c__Dehalococcoidia;o__GIF9;f__AB-539-J10;g__20-14-all-45-10;s__
8_1_Oct_SF_Bin82_scaffold_71163_c1_1	NiFe_Group_3c	8_1_Oct_SF_Bin82	d__Bacteria;p__Chloroflexota;c__Dehalococcoidia;o__GIF9;f__AB-539-J10;g__20-14-all-45-10;s__
4_1_Jan_SF_Bin38_4_1_Jan_bin_38_scaffold_12961_c1_2	NiFe_Group_4d	4_1_Jan_SF_Bin38	d__Bacteria;p__Chloroflexota;c__Dehalococcoidia;o__GIF9;f__AB-539-J10;g__RBG-13-51-36;s__
4_1_Jan_SF_Bin38_4_1_Jan_bin_38_scaffold_4917_c1_9	NiFe_Group_3c	4_1_Jan_SF_Bin38	d__Bacteria;p__Chloroflexota;c__Dehalococcoidia;o__GIF9;f__AB-539-J10;g__RBG-13-51-36;s__
4_1_July_SF_Bin57_4_1_July_bin_57_scaffold_18208_c1_3	NiFe_Group_3c	4_1_July_SF_Bin57	d__Bacteria;p__Chloroflexota;c__Dehalococcoidia;o__GIF9;f__AB-539-J10;g__RBG-13-51-36;s__
4_1_July_SF_Bin62_4_1_July_bin_62_scaffold_11251_c1_6	NiFe_Group_3c	4_1_July_SF_Bin62	d__Bacteria;p__Chloroflexota;c__Dehalococcoidia;o__GIF9;f__AB-539-J10;g__RBG-13-51-36;s__
4_1_May_SF_Bin14_scaffold_31323_c1_3	NiFe_Group_3c	4_1_May_SF_Bin14	d__Bacteria;p__Chloroflexota;c__Dehalococcoidia;o__GIF9;f__AB-539-J10;g__RBG-13-51-36;s__
4_1_May_SF_Bin14_scaffold_36497_c1_5	NiFe_Group_4d	4_1_May_SF_Bin14	d__Bacteria;p__Chloroflexota;c__Dehalococcoidia;o__GIF9;f__AB-539-J10;g__RBG-13-51-36;s__
4_1_May_SF_Bin29_scaffold_14763_c1_4	NiFe_Group_3c	4_1_May_SF_Bin29	d__Bacteria;p__Chloroflexota;c__Dehalococcoidia;o__GIF9;f__AB-539-J10;g__RBG-13-51-36;s__
13_July_SF_Bin2_scaffold_17607_c1_3	NiFe_Group_3b	13_July_SF_Bin2	d__Bacteria;p__Desulfobacterota_B;c__Binatia;o__UBA9968;f__UBA9968;g__;s__
21_May_SF_Bin32_scaffold_28810_c1_3	NiFe_Group_4e	21_May_SF_Bin32	d__Bacteria;p__Desulfobacterota;c__Desulfobacteria;o__Desulfobacterales;f__;g__;s__
24_Jan_SF_Bin12_scaffold_4558_c1_5	NiFe_Group_1b	24_Jan_SF_Bin12	d__Bacteria;p__Desulfobacterota;c__Desulfobacteria;o__Desulfobacterales;f__;g__;s__
24_Oct_SF_Bin38_scaffold_16152_c1_1	NiFe_Group_4e	24_Oct_SF_Bin38	d__Bacteria;p__Desulfobacterota;c__Desulfobacteria;o__Desulfobacterales;f__SURF-15;g__;s__
24_Oct_SF_Bin38_scaffold_5804_c1_4	NiFe_Group_1b	24_Oct_SF_Bin38	d__Bacteria;p__Desulfobacterota;c__Desulfobacteria;o__Desulfobacterales;f__SURF-15;g__;s__
13_Jan_SF_Bin31_scaffold_27239_c1_4	NiFe_Group_1c	13_Jan_SF_Bin31	d__Bacteria;p__Desulfobacterota;c__Desulfobacteria;o__Desulfobacterales;f__UBA11574;g__JAAXQD01;s__
13_Oct_SF_Bin29_scaffold_13709_c1_3	NiFe_Group_1c	13_Oct_SF_Bin29	d__Bacteria;p__Desulfobacterota;c__Desulfobacteria;o__Desulfobacterales;f__UBA11574;g__JAAXQD01;s__
13_Oct_SF_Bin29_scaffold_90909_c1_3	NiFe_Group_1b	13_Oct_SF_Bin29	d__Bacteria;p__Desulfobacterota;c__Desulfobacteria;o__Desulfobacterales;f__UBA11574;g__JAAXQD01;s__
4_1_July_SF_Bin60_4_1_July_bin_60_scaffold_6326_c1_5	NiFe_Group_1c	4_1_July_SF_Bin60	d__Bacteria;p__Desulfobacterota;c__Desulfobacteria;o__Desulfobacterales;f__UBA11574;g__UBA11574;s__
21_Oct_SF_Bin14_scaffold_10145_c1_1	NiFe_Group_1b	21_Oct_SF_Bin14	d__Bacteria;p__Desulfobacterota;c__Desulfobacteria;o__Desulfobacterales;f__UBA2174_A;g__;s__
21_Oct_SF_Bin14_scaffold_12006_c1_5	NiFe_Group_4e	21_Oct_SF_Bin14	d__Bacteria;p__Desulfobacterota;c__Desulfobacteria;o__Desulfobacterales;f__UBA2174_A;g__;s__
21_Oct_SF_Bin14_scaffold_16144_c1_4	NiFe_Group_3d	21_Oct_SF_Bin14	d__Bacteria;p__Desulfobacterota;c__Desulfobacteria;o__Desulfobacterales;f__UBA2174_A;g__;s__
13_Jan_SF_Bin30_scaffold_3622_c1_1	NiFe_Group_1c	13_Jan_SF_Bin30	d__Bacteria;p__Desulfobacterota;c__Desulfobulbia;o__Desulfobulbales;f__BM004;g__BM004;s__BM004 sp002868955
13_Oct_SF_Bin33_scaffold_128_c1_5	NiFe_Group_1c	13_Oct_SF_Bin33	d__Bacteria;p__Desulfobacterota;c__Desulfobulbia;o__Desulfobulbales;f__BM004;g__BM004;s__BM004 sp002868955
21_July_SF_Bin2_scaffold_8701_c1_3	NiFe_Group_1c	21_July_SF_Bin2	d__Bacteria;p__Desulfobacterota;c__Desulfobulbia;o__Desulfobulbales;f__BM004;g__BM004;s__BM004 sp002868955
21_May_SF_Bin30_scaffold_728_c1_9	NiFe_Group_1c	21_May_SF_Bin30	d__Bacteria;p__Desulfobacterota;c__Desulfobulbia;o__Desulfobulbales;f__BM004;g__BM004;s__BM004 sp002868955
21_Oct_SF_Bin18_scaffold_5215_c1_3	NiFe_Group_1c	21_Oct_SF_Bin18	d__Bacteria;p__Desulfobacterota;c__Desulfobulbia;o__Desulfobulbales;f__BM004;g__BM004;s__BM004 sp002868955
24_Jan_SF_Bin20_scaffold_4344_c1_3	NiFe_Group_1c	24_Jan_SF_Bin20	d__Bacteria;p__Desulfobacterota;c__Desulfobulbia;o__Desulfobulbales;f__BM004;g__BM004;s__BM004 sp002868955
24_Oct_SF_Bin27_scaffold_4942_c1_3	NiFe_Group_1c	24_Oct_SF_Bin27	d__Bacteria;p__Desulfobacterota;c__Desulfobulbia;o__Desulfobulbales;f__BM004;g__BM004;s__BM004 sp002868955
13_Jan_SF_Bin12_scaffold_14046_c1_2	NiFe_Group_1c	13_Jan_SF_Bin12	d__Bacteria;p__Desulfobacterota;c__Desulfobulbia;o__Desulfobulbales;f__Desulfobulbaceae;g__;s__
13_Jan_SF_Bin12_scaffold_2876_c1_7	NiFe_Group_3b	13_Jan_SF_Bin12	d__Bacteria;p__Desulfobacterota;c__Desulfobulbia;o__Desulfobulbales;f__Desulfobulbaceae;g__;s__
13_Jan_SF_Bin14_scaffold_3698_c1_1	NiFe_Group_1c	13_Jan_SF_Bin14	d__Bacteria;p__Desulfobacterota;c__Desulfobulbia;o__Desulfobulbales;f__Desulfobulbaceae;g__;s__
13_Jan_SF_Bin14_scaffold_675_c1_11	NiFe_Group_3b	13_Jan_SF_Bin14	d__Bacteria;p__Desulfobacterota;c__Desulfobulbia;o__Desulfobulbales;f__Desulfobulbaceae;g__;s__
4_1_May_SF_Bin4_scaffold_7366_c1_7	NiFe_Group_3b	4_1_May_SF_Bin4	d__Bacteria;p__Desulfobacterota;c__Desulfobulbia;o__Desulfobulbales;f__Desulfobulbaceae;g__;s__
8_1_July_SF_Bin20_scaffold_42_c2_7	NiFe_Group_1a	8_1_July_SF_Bin20	d__Bacteria;p__Desulfobacterota;c__Desulfobulbia;o__Desulfobulbales;f__Desulfurivibrionaceae;g__DUZU01;s__DUZU01 sp013349285
8_1_July_SF_Bin20_scaffold_84_c1_46	NiFe_Group_3b	8_1_July_SF_Bin20	d__Bacteria;p__Desulfobacterota;c__Desulfobulbia;o__Desulfobulbales;f__Desulfurivibrionaceae;g__DUZU01;s__DUZU01 sp013349285
4_1_May_SF_Bin58_scaffold_139_c1_24	NiFe_Group_3b	4_1_May_SF_Bin58	d__Bacteria;p__Desulfobacterota;c__Desulfobulbia;o__Desulfobulbales;f__Desulfurivibrionaceae;g__UBA2262;s__UBA2262 sp013349295
4_1_May_SF_Bin58_scaffold_324_c1_25	NiFe_Group_1a	4_1_May_SF_Bin58	d__Bacteria;p__Desulfobacterota;c__Desulfobulbia;o__Desulfobulbales;f__Desulfurivibrionaceae;g__UBA2262;s__UBA2262 sp013349295
13_Jan_SF_Bin54_scaffold_20220_c1_1	NiFe_Group_1a	13_Jan_SF_Bin54	d__Bacteria;p__Desulfobacterota;c__Desulfobulbia;o__Desulfobulbales;f__Desulfurivibrionaceae;g__UBA5123;s__
4_1_May_SF_Bin57_scaffold_5371_c1_3	NiFe_Group_1a	4_1_May_SF_Bin57	d__Bacteria;p__Desulfobacterota;c__Desulfobulbia;o__Desulfobulbales;f__Desulfurivibrionaceae;g__UBA5123;s__
4_1_May_SF_Bin57_scaffold_6402_c1_4	NiFe_Group_1c	4_1_May_SF_Bin57	d__Bacteria;p__Desulfobacterota;c__Desulfobulbia;o__Desulfobulbales;f__Desulfurivibrionaceae;g__UBA5123;s__
4_1_May_SF_Bin9_scaffold_3058_c1_2	NiFe_Group_1a	4_1_May_SF_Bin9	d__Bacteria;p__Desulfobacterota;c__Desulfobulbia;o__Desulfobulbales;f__Desulfurivibrionaceae;g__UBA5123;s__
24_Oct_SF_Bin20_scaffold_2556_c1_6	NiFe_Group_1f	24_Oct_SF_Bin20	d__Bacteria;p__Desulfobacterota;c__Desulfuromonadia;o__Desulfuromonadales;f__BM103;g__;s__
24_Oct_SF_Bin31_scaffold_10321_c1_5	NiFe_Group_3c	24_Oct_SF_Bin31	d__Bacteria;p__Desulfobacterota;c__Desulfuromonadia;o__Desulfuromonadales;f__BM103;g__;s__
24_Oct_SF_Bin31_scaffold_6191_c1_2	NiFe_Group_1f	24_Oct_SF_Bin31	d__Bacteria;p__Desulfobacterota;c__Desulfuromonadia;o__Desulfuromonadales;f__BM103;g__;s__
13_Jan_SF_Bin1_scaffold_19255_c1_4	NiFe_Group_1f	13_Jan_SF_Bin1	d__Bacteria;p__Desulfobacterota;c__Desulfuromonadia;o__Desulfuromonadales;f__BM103;g__M0040;s__
13_Jan_SF_Bin1_scaffold_29343_c1_1	NiFe_Group_1f	13_Jan_SF_Bin1	d__Bacteria;p__Desulfobacterota;c__Desulfuromonadia;o__Desulfuromonadales;f__BM103;g__M0040;s__
13_Oct_SF_Bin5_scaffold_585_c1_12	NiFe_Group_1f	13_Oct_SF_Bin5	d__Bacteria;p__Desulfobacterota;c__Desulfuromonadia;o__Desulfuromonadales;f__BM103;g__M0040;s__
21_May_SF_Bin22_scaffold_2096_c1_7	NiFe_Group_1f	21_May_SF_Bin22	d__Bacteria;p__Desulfobacterota;c__Desulfuromonadia;o__Desulfuromonadales;f__BM103;g__M0040;s__
24_July_SF_Bin1_scaffold_5722_c1_2	NiFe_Group_1f	24_July_SF_Bin1	d__Bacteria;p__Desulfobacterota;c__Desulfuromonadia;o__Desulfuromonadales;f__BM103;g__M0040;s__
24_May_SF_Bin4_scaffold_13128_c1_2	NiFe_Group_1f	24_May_SF_Bin4	d__Bacteria;p__Desulfobacterota;c__Desulfuromonadia;o__Desulfuromonadales;f__BM103;g__M0040;s__
24_Oct_SF_Bin9_scaffold_1496_c1_5	NiFe_Group_1f	24_Oct_SF_Bin9	d__Bacteria;p__Desulfobacterota;c__Desulfuromonadia;o__Desulfuromonadales;f__BM103;g__M0040;s__
4_1_July_SF_Bin55_4_1_July_bin_55_scaffold_7677_c1_4	NiFe_Group_1f	4_1_July_SF_Bin55	d__Bacteria;p__Desulfobacterota;c__SM23-61;o__SM23-61;f__SM23-61;g__JAHJQK01;s__
13_Oct_SF_Bin15_scaffold_4869_c1_4	NiFe_Group_3d	13_Oct_SF_Bin15	d__Bacteria;p__Desulfobacterota;c__Syntrophobacteria;o__BM002;f__BM002;g__BM002;s__BM002 sp002899795
13_Oct_SF_Bin15_scaffold_7912_c1_4	NiFe_Group_1b	13_Oct_SF_Bin15	d__Bacteria;p__Desulfobacterota;c__Syntrophobacteria;o__BM002;f__BM002;g__BM002;s__BM002 sp002899795
21_July_SF_Bin16_scaffold_11087_c1_4	NiFe_Group_3d	21_July_SF_Bin16	d__Bacteria;p__Desulfobacterota;c__Syntrophobacteria;o__BM002;f__BM002;g__BM002;s__BM002 sp002899795
21_July_SF_Bin16_scaffold_13040_c1_1	NiFe_Group_1b	21_July_SF_Bin16	d__Bacteria;p__Desulfobacterota;c__Syntrophobacteria;o__BM002;f__BM002;g__BM002;s__BM002 sp002899795
21_May_SF_Bin20_scaffold_10473_c1_1	NiFe_Group_3d	21_May_SF_Bin20	d__Bacteria;p__Desulfobacterota;c__Syntrophobacteria;o__BM002;f__BM002;g__BM002;s__BM002 sp002899795
21_May_SF_Bin20_scaffold_7025_c1_4	NiFe_Group_1b	21_May_SF_Bin20	d__Bacteria;p__Desulfobacterota;c__Syntrophobacteria;o__BM002;f__BM002;g__BM002;s__BM002 sp002899795
21_Oct_SF_Bin24_scaffold_1048_c1_2	NiFe_Group_1b	21_Oct_SF_Bin24	d__Bacteria;p__Desulfobacterota;c__Syntrophobacteria;o__BM002;f__BM002;g__BM002;s__BM002 sp002899795
24_Jan_SF_Bin17_scaffold_3666_c1_1	NiFe_Group_3d	24_Jan_SF_Bin17	d__Bacteria;p__Desulfobacterota;c__Syntrophobacteria;o__BM002;f__BM002;g__BM002;s__BM002 sp002899795
24_Jan_SF_Bin17_scaffold_4950_c1_1	NiFe_Group_1b	24_Jan_SF_Bin17	d__Bacteria;p__Desulfobacterota;c__Syntrophobacteria;o__BM002;f__BM002;g__BM002;s__BM002 sp002899795
24_July_SF_Bin12_scaffold_1735_c1_7	NiFe_Group_1b	24_July_SF_Bin12	d__Bacteria;p__Desulfobacterota;c__Syntrophobacteria;o__BM002;f__BM002;g__BM002;s__BM002 sp002899795
24_May_SF_Bin32_scaffold_4943_c1_5	NiFe_Group_1b	24_May_SF_Bin32	d__Bacteria;p__Desulfobacterota;c__Syntrophobacteria;o__BM002;f__BM002;g__BM002;s__BM002 sp002899795
24_Oct_SF_Bin1_scaffold_4486_c1_5	NiFe_Group_3d	24_Oct_SF_Bin1	d__Bacteria;p__Desulfobacterota;c__Syntrophobacteria;o__BM002;f__BM002;g__BM002;s__BM002 sp002899795
24_Oct_SF_Bin1_scaffold_8632_c1_1	NiFe_Group_1b	24_Oct_SF_Bin1	d__Bacteria;p__Desulfobacterota;c__Syntrophobacteria;o__BM002;f__BM002;g__BM002;s__BM002 sp002899795
4_1_May_SF_Bin68_scaffold_5930_c1_6	NiFe_Group_1f	4_1_May_SF_Bin68	d__Bacteria;p__Gemmatimonadota;c__Gemmatimonadetes;o__Gemmatimonadales;f__Gemmatimonadaceae;g__PNKF01;s__
4_1_Jan_SF_Bin35_4_1_Jan_bin_35_scaffold_6622_c1_3	NiFe_Group_1f	4_1_Jan_SF_Bin35	d__Bacteria;p__Gemmatimonadota;c__Gemmatimonadetes;o__Gemmatimonadales;f__GWC2-71-9;g__;s__
4_1_Oct_SF_Bin44_scaffold_29566_c1_2	NiFe_Group_1f	4_1_Oct_SF_Bin44	d__Bacteria;p__Gemmatimonadota;c__Gemmatimonadetes;o__Gemmatimonadales;f__GWC2-71-9;g__;s__
13_Jan_SF_Bin53_scaffold_417_c1_9	NiFe_Group_1f	13_Jan_SF_Bin53	d__Bacteria;p__Gemmatimonadota;c__Gemmatimonadetes;o__Gemmatimonadales;f__GWC2-71-9;g__WVYX01;s__
13_July_SF_Bin32_scaffold_46_c1_58	NiFe_Group_1f	13_July_SF_Bin32	d__Bacteria;p__Gemmatimonadota;c__Gemmatimonadetes;o__Gemmatimonadales;f__GWC2-71-9;g__WVYX01;s__
13_May_SF_Bin58_scaffold_104_c1_19	NiFe_Group_1f	13_May_SF_Bin58	d__Bacteria;p__Gemmatimonadota;c__Gemmatimonadetes;o__Gemmatimonadales;f__GWC2-71-9;g__WVYX01;s__
13_May_SF_Bin79_scaffold_33850_c1_2	NiFe_Group_1f	13_May_SF_Bin79	d__Bacteria;p__Gemmatimonadota;c__Gemmatimonadetes;o__Gemmatimonadales;f__GWC2-71-9;g__WVYX01;s__
13_May_SF_Bin79_scaffold_5047_c1_4	NiFe_Group_1f	13_May_SF_Bin79	d__Bacteria;p__Gemmatimonadota;c__Gemmatimonadetes;o__Gemmatimonadales;f__GWC2-71-9;g__WVYX01;s__
13_Oct_SF_Bin3_scaffold_854_c1_7	NiFe_Group_1f	13_Oct_SF_Bin3	d__Bacteria;p__Gemmatimonadota;c__Gemmatimonadetes;o__Gemmatimonadales;f__GWC2-71-9;g__WVYX01;s__
8_1_July_SF_Bin36_scaffold_1287_c1_15	NiFe_Group_1f	8_1_July_SF_Bin36	d__Bacteria;p__Gemmatimonadota;c__Gemmatimonadetes;o__Gemmatimonadales;f__GWC2-71-9;g__WVYX01;s__
8_1_Oct_SF_Bin61_scaffold_230_c1_18	NiFe_Group_1f	8_1_Oct_SF_Bin61	d__Bacteria;p__Gemmatimonadota;c__Gemmatimonadetes;o__Longimicrobiales;f__UBA6960;g__;s__
8_1_July_SF_Bin64_scaffold_33552_c1_2	NiFe_Group_1f	8_1_July_SF_Bin64	d__Bacteria;p__Gemmatimonadota;c__Gemmatimonadetes;o__Longimicrobiales;f__UBA6960;g__SZUA-318;s__
13_May_SF_Bin31_scaffold_98_c1_2	NiFe_Group_1f	13_May_SF_Bin31	d__Bacteria;p__Gemmatimonadota;c__Gemmatimonadetes;o__Longimicrobiales;f__UBA6960;g__UBA2982;s__
13_May_SF_Bin18_scaffold_1200_c1_5	NiFe_Group_1d	13_May_SF_Bin18	d__Bacteria;p__Krumholzibacteriota;c__Krumholzibacteria;o__WVZY01;f__;g__;s__
13_May_SF_Bin18_scaffold_2299_c1_14	NiFe_Group_3c	13_May_SF_Bin18	d__Bacteria;p__Krumholzibacteriota;c__Krumholzibacteria;o__WVZY01;f__;g__;s__
4_1_Jan_SF_Bin19_4_1_Jan_bin_19_scaffold_404_c1_4	NiFe_Group_1d	4_1_Jan_SF_Bin19	d__Bacteria;p__Krumholzibacteriota;c__Krumholzibacteria;o__WVZY01;f__;g__;s__
4_1_May_SF_Bin56_scaffold_465_c1_22	NiFe_Group_1d	4_1_May_SF_Bin56	d__Bacteria;p__Krumholzibacteriota;c__Krumholzibacteria;o__WVZY01;f__;g__;s__
4_1_Oct_SF_Bin54_scaffold_19554_c1_1	NiFe_Group_1d	4_1_Oct_SF_Bin54	d__Bacteria;p__Krumholzibacteriota;c__Krumholzibacteria;o__WVZY01;f__;g__;s__
13_July_SF_Bin27_scaffold_61_c1_12	NiFe_Group_1f	13_July_SF_Bin27	d__Bacteria;p__Myxococcota;c__Polyangia;o__Polyangiales;f__SG8-38;g__;s__
13_May_SF_Bin32_scaffold_13_c1_70	NiFe_Group_1f	13_May_SF_Bin32	d__Bacteria;p__Myxococcota;c__Polyangia;o__Polyangiales;f__SG8-38;g__;s__
21_Jan_SF_Bin46_scaffold_38_c1_3	NiFe_Group_1f	21_Jan_SF_Bin46	d__Bacteria;p__Myxococcota;c__Polyangia;o__Polyangiales;f__SG8-38;g__;s__
21_Oct_SF_Bin11_scaffold_2178_c1_5	NiFe_Group_1f	21_Oct_SF_Bin11	d__Bacteria;p__Myxococcota;c__Polyangia;o__Polyangiales;f__SG8-38;g__;s__
21_Jan_SF_Bin28_scaffold_126_c1_7	NiFe_Group_1f	21_Jan_SF_Bin28	d__Bacteria;p__Myxococcota;c__Polyangia;o__Polyangiales;f__SG8-38;g__SG8-38;s__
21_May_SF_Bin23_scaffold_11225_c1_3	NiFe_Group_1f	21_May_SF_Bin23	d__Bacteria;p__Myxococcota;c__Polyangia;o__Polyangiales;f__SG8-38;g__SG8-38;s__
4_1_May_SF_Bin28_scaffold_44217_c1_1	NiFe_Group_1f	4_1_May_SF_Bin28	d__Bacteria;p__Myxococcota;c__Polyangia;o__Polyangiales;f__SG8-38;g__SG8-38;s__
8_1_July_SF_Bin34_scaffold_27_c1_100	NiFe_Group_1b	8_1_July_SF_Bin34	d__Bacteria;p__Nitrospinota;c__UBA7883;o__JACRGQ01;f__;g__;s__
4_1_July_SF_Bin3_4_1_July_bin_3_scaffold_1998_c1_1	NiFe_Group_1b	4_1_July_SF_Bin3	d__Bacteria;p__Nitrospinota;c__UBA7883;o__UBA7883;f__UBA7883;g__;s__
4_1_July_SF_Bin3_4_1_July_bin_3_scaffold_4206_c1_9	NiFe_Group_1b	4_1_July_SF_Bin3	d__Bacteria;p__Nitrospinota;c__UBA7883;o__UBA7883;f__UBA7883;g__;s__
8_1_July_SF_Bin48_scaffold_2109_c1_10	NiFe_Group_3d	8_1_July_SF_Bin48	d__Bacteria;p__Nitrospinota;c__UBA7883;o__UBA7883;f__UBA7883;g__;s__
8_1_May_SF_Bin11_scaffold_10766_c1_2	NiFe_Group_3d	8_1_May_SF_Bin11	d__Bacteria;p__Nitrospinota;c__UBA7883;o__UBA7883;f__UBA7883;g__;s__
8_1_Oct_SF_Bin59_scaffold_2082_c1_5	NiFe_Group_3d	8_1_Oct_SF_Bin59	d__Bacteria;p__Nitrospinota;c__UBA7883;o__UBA7883;f__UBA7883;g__;s__
8_1_Oct_SF_Bin59_scaffold_8922_c1_3	NiFe_Group_1b	8_1_Oct_SF_Bin59	d__Bacteria;p__Nitrospinota;c__UBA7883;o__UBA7883;f__UBA7883;g__;s__
4_1_Jan_SF_Bin16_4_1_Jan_bin_16_scaffold_2223_c1_6	NiFe_Group_3b	4_1_Jan_SF_Bin16	d__Bacteria;p__Nitrospirota;c__;o__;f__;g__;s__
4_1_Jan_SF_Bin51_4_1_Jan_bin_51_scaffold_27217_c1_4	NiFe_Group_3b	4_1_Jan_SF_Bin51	d__Bacteria;p__Nitrospirota;c__Nitrospiria;o__Nitrospirales;f__Nitrospiraceae;g__Nitrospira_F;s__
4_1_July_SF_Bin51_4_1_July_bin_51_scaffold_22854_c1_3	NiFe_Group_3b	4_1_July_SF_Bin51	d__Bacteria;p__Nitrospirota;c__Nitrospiria;o__Nitrospirales;f__Nitrospiraceae;g__Nitrospira_F;s__
4_1_May_SF_Bin6_scaffold_2551_c1_1	NiFe_Group_3b	4_1_May_SF_Bin6	d__Bacteria;p__Nitrospirota;c__Nitrospiria;o__Nitrospirales;f__Nitrospiraceae;g__Nitrospira_F;s__
4_1_Oct_SF_Bin9_scaffold_9655_c1_5	NiFe_Group_3b	4_1_Oct_SF_Bin9	d__Bacteria;p__Nitrospirota;c__Nitrospiria;o__Nitrospirales;f__Nitrospiraceae;g__Nitrospira_F;s__
8_1_Oct_SF_Bin63_scaffold_14701_c1_1	NiFe_Group_3b	8_1_Oct_SF_Bin63	d__Bacteria;p__Nitrospirota;c__Nitrospiria;o__Nitrospirales;f__Nitrospiraceae;g__Nitrospira_F;s__
8_1_Jan_SF_Bin13_scaffold_13219_c1_5	NiFe_Group_1a	8_1_Jan_SF_Bin13	d__Bacteria;p__Nitrospirota;c__Thermodesulfovibrionia;o__Thermodesulfovibrionales;f__SM23-35;g__VGWZ01;s__
8_1_Oct_SF_Bin79_scaffold_23282_c1_2	NiFe_Group_1a	8_1_Oct_SF_Bin79	d__Bacteria;p__Nitrospirota;c__Thermodesulfovibrionia;o__Thermodesulfovibrionales;f__SM23-35;g__VGWZ01;s__
4_1_July_SF_Bin47_4_1_July_bin_47_scaffold_5206_c1_4	NiFe_Group_3b	4_1_July_SF_Bin47	d__Bacteria;p__Nitrospirota;c__Thermodesulfovibrionia;o__Thermodesulfovibrionales;f__UBA6898;g__GW-Nitrospira-1;s__
4_1_July_SF_Bin47_4_1_July_bin_47_scaffold_6305_c1_8	NiFe_Group_1c	4_1_July_SF_Bin47	d__Bacteria;p__Nitrospirota;c__Thermodesulfovibrionia;o__Thermodesulfovibrionales;f__UBA6898;g__GW-Nitrospira-1;s__
4_1_Jan_SF_Bin13_4_1_Jan_bin_13_scaffold_26626_c1_3	NiFe_Group_1f	4_1_Jan_SF_Bin13	d__Bacteria;p__Nitrospirota;c__Thermodesulfovibrionia;o__UBA6902;f__UBA6902;g__;s__
4_1_Jan_SF_Bin13_4_1_Jan_bin_13_scaffold_6496_c1_2	NiFe_Group_3c	4_1_Jan_SF_Bin13	d__Bacteria;p__Nitrospirota;c__Thermodesulfovibrionia;o__UBA6902;f__UBA6902;g__;s__
4_1_July_SF_Bin20_4_1_July_bin_20_scaffold_134_c1_51	NiFe_Group_1c	4_1_July_SF_Bin20	d__Bacteria;p__Nitrospirota;c__UBA9217;o__UBA9217;f__UBA9217;g__;s__
4_1_July_SF_Bin20_4_1_July_bin_20_scaffold_24_c1_88	NiFe_Group_3b	4_1_July_SF_Bin20	d__Bacteria;p__Nitrospirota;c__UBA9217;o__UBA9217;f__UBA9217;g__;s__
4_1_July_SF_Bin52_4_1_July_bin_52_scaffold_1183_c1_3	NiFe_Group_3c	4_1_July_SF_Bin52	d__Bacteria;p__Planctomycetota;c__Phycisphaerae;o__Sedimentisphaerales;f__SG8-4;g__CS2-K091;s__
21_Jan_SF_Bin71_scaffold_25177_c1_3	NiFe_Group_1d	21_Jan_SF_Bin71	d__Bacteria;p__Planctomycetota;c__Planctomycetia;o__Pirellulales;f__UBA7805;g__CS4-C045;s__
21_Jan_SF_Bin71_scaffold_37294_c1_6	NiFe_Group_1d	21_Jan_SF_Bin71	d__Bacteria;p__Planctomycetota;c__Planctomycetia;o__Pirellulales;f__UBA7805;g__CS4-C045;s__
21_Jan_SF_Bin24_scaffold_75562_c1_2	NiFe_Group_1d	21_Jan_SF_Bin24	d__Bacteria;p__Proteobacteria;c__Alphaproteobacteria;o__Geminicoccales;f__Geminicoccaceae;g__CADEGR01;s__
21_Jan_SF_Bin24_scaffold_8215_c1_4	NiFe_Group_3b	21_Jan_SF_Bin24	d__Bacteria;p__Proteobacteria;c__Alphaproteobacteria;o__Geminicoccales;f__Geminicoccaceae;g__CADEGR01;s__
24_Oct_SF_Bin19_scaffold_9658_c1_5	NiFe_Group_1d	24_Oct_SF_Bin19	d__Bacteria;p__Proteobacteria;c__Alphaproteobacteria;o__Kiloniellales;f__J153;g__;s__
13_May_SF_Bin88_scaffold_46361_c1_1	NiFe_Group_1e	13_May_SF_Bin88	d__Bacteria;p__Proteobacteria;c__Gammaproteobacteria;o__Acidiferrobacterales;f__Sulfurifustaceae;g__Sulfuricaulis;s__
8_1_July_SF_Bin13_scaffold_7708_c1_6	NiFe_Group_3b	8_1_July_SF_Bin13	d__Bacteria;p__Proteobacteria;c__Gammaproteobacteria;o__Acidiferrobacterales;f__Sulfurifustaceae;g__Sulfuricaulis;s__
13_May_SF_Bin64_scaffold_18617_c1_4	NiFe_Group_1e	13_May_SF_Bin64	d__Bacteria;p__Proteobacteria;c__Gammaproteobacteria;o__Arenicellales;f__JAANXG01;g__;s__
13_Jan_SF_Bin46_scaffold_1772_c1_4	NiFe_Group_1d	13_Jan_SF_Bin46	d__Bacteria;p__Proteobacteria;c__Gammaproteobacteria;o__BM003;f__BM003;g__;s__
21_May_SF_Bin35_scaffold_7584_c1_4	NiFe_Group_1d	21_May_SF_Bin35	d__Bacteria;p__Proteobacteria;c__Gammaproteobacteria;o__BM003;f__BM003;g__BM003;s__BM003 sp002868855
4_1_Oct_SF_Bin51_scaffold_26530_c1_2	NiFe_Group_1d	4_1_Oct_SF_Bin51	d__Bacteria;p__Proteobacteria;c__Gammaproteobacteria;o__Burkholderiales;f__Burkholderiaceae;g__;s__
4_1_May_SF_Bin30_scaffold_17709_c1_4	NiFe_Group_1d	4_1_May_SF_Bin30	d__Bacteria;p__Proteobacteria;c__Gammaproteobacteria;o__Burkholderiales;f__Burkholderiaceae;g__CADEEN01;s__
4_1_May_SF_Bin30_scaffold_8540_c1_1	NiFe_Group_1d	4_1_May_SF_Bin30	d__Bacteria;p__Proteobacteria;c__Gammaproteobacteria;o__Burkholderiales;f__Burkholderiaceae;g__CADEEN01;s__
4_1_Oct_SF_Bin28_scaffold_14173_c1_4	NiFe_Group_1d	4_1_Oct_SF_Bin28	d__Bacteria;p__Proteobacteria;c__Gammaproteobacteria;o__Burkholderiales;f__Burkholderiaceae;g__CADEEN01;s__
4_1_Oct_SF_Bin28_scaffold_1604_c1_1	NiFe_Group_1d	4_1_Oct_SF_Bin28	d__Bacteria;p__Proteobacteria;c__Gammaproteobacteria;o__Burkholderiales;f__Burkholderiaceae;g__CADEEN01;s__
13_July_SF_Bin36_scaffold_6876_c1_3	NiFe_Group_3d	13_July_SF_Bin36	d__Bacteria;p__Proteobacteria;c__Gammaproteobacteria;o__Burkholderiales;f__Burkholderiaceae;g__CAIKUF01;s__
4_1_Jan_SF_Bin28_4_1_Jan_bin_28_scaffold_3473_c1_6	NiFe_Group_3d	4_1_Jan_SF_Bin28	d__Bacteria;p__Proteobacteria;c__Gammaproteobacteria;o__Burkholderiales;f__Burkholderiaceae;g__Rubrivivax;s__
4_1_Oct_SF_Bin16_scaffold_1478_c1_12	NiFe_Group_1d	4_1_Oct_SF_Bin16	d__Bacteria;p__Proteobacteria;c__Gammaproteobacteria;o__Burkholderiales;f__Casimicrobiaceae;g__VBCG01;s__
4_1_July_SF_Bin49_4_1_July_bin_49_scaffold_11612_c2_4	NiFe_Group_3d	4_1_July_SF_Bin49	d__Bacteria;p__Proteobacteria;c__Gammaproteobacteria;o__Burkholderiales;f__Gallionellaceae;g__Gallionella;s__
4_1_July_SF_Bin6_4_1_July_bin_6_scaffold_33101_c1_2	NiFe_Group_1e	4_1_July_SF_Bin6	d__Bacteria;p__Proteobacteria;c__Gammaproteobacteria;o__Burkholderiales;f__Gallionellaceae;g__Gallionella;s__
4_1_May_SF_Bin13_scaffold_18838_c1_2	NiFe_Group_3d	4_1_May_SF_Bin13	d__Bacteria;p__Proteobacteria;c__Gammaproteobacteria;o__Burkholderiales;f__Gallionellaceae;g__Gallionella;s__
4_1_May_SF_Bin13_scaffold_39962_c1_1	NiFe_Group_3d	4_1_May_SF_Bin13	d__Bacteria;p__Proteobacteria;c__Gammaproteobacteria;o__Burkholderiales;f__Gallionellaceae;g__Gallionella;s__
4_1_May_SF_Bin26_scaffold_17327_c1_4	NiFe_Group_3d	4_1_May_SF_Bin26	d__Bacteria;p__Proteobacteria;c__Gammaproteobacteria;o__Burkholderiales;f__Gallionellaceae;g__VIKH01;s__
4_1_May_SF_Bin26_scaffold_19819_c1_1	NiFe_Group_3d	4_1_May_SF_Bin26	d__Bacteria;p__Proteobacteria;c__Gammaproteobacteria;o__Burkholderiales;f__Gallionellaceae;g__VIKH01;s__
4_1_July_SF_Bin28_4_1_July_bin_28_scaffold_2410_c1_12	NiFe_Group_1d	4_1_July_SF_Bin28	d__Bacteria;p__Proteobacteria;c__Gammaproteobacteria;o__Burkholderiales;f__SG8-39;g__SG8-39;s__
4_1_Oct_SF_Bin40_scaffold_26836_c1_1	NiFe_Group_1d	4_1_Oct_SF_Bin40	d__Bacteria;p__Proteobacteria;c__Gammaproteobacteria;o__Burkholderiales;f__Usitatibacteraceae;g__FEB-7;s__
4_1_Oct_SF_Bin40_scaffold_27555_c1_1	NiFe_Group_1d	4_1_Oct_SF_Bin40	d__Bacteria;p__Proteobacteria;c__Gammaproteobacteria;o__Burkholderiales;f__Usitatibacteraceae;g__FEB-7;s__
4_1_Oct_SF_Bin40_scaffold_3581_c1_8	NiFe_Group_3d	4_1_Oct_SF_Bin40	d__Bacteria;p__Proteobacteria;c__Gammaproteobacteria;o__Burkholderiales;f__Usitatibacteraceae;g__FEB-7;s__
13_May_SF_Bin91_scaffold_1303_c1_15	NiFe_Group_1e	13_May_SF_Bin91	d__Bacteria;p__Proteobacteria;c__Gammaproteobacteria;o__GCA-2729495;f__GCA-2729495;g__;s__
24_Oct_SF_Bin23_scaffold_1660_c1_9	NiFe_Group_1d	24_Oct_SF_Bin23	d__Bacteria;p__Proteobacteria;c__Gammaproteobacteria;o__Pseudomonadales;f__Halieaceae;g__Halioglobus;s__
4_1_Jan_SF_Bin4_4_1_Jan_bin_4_scaffold_10727_c1_1	NiFe_Group_1d	4_1_Jan_SF_Bin4	d__Bacteria;p__Proteobacteria;c__Gammaproteobacteria;o__Pseudomonadales;f__Halieaceae;g__Halioglobus;s__
4_1_Oct_SF_Bin34_scaffold_24102_c1_2	NiFe_Group_1d	4_1_Oct_SF_Bin34	d__Bacteria;p__Proteobacteria;c__Gammaproteobacteria;o__Pseudomonadales;f__Halieaceae;g__Halioglobus;s__
21_Jan_SF_Bin40_scaffold_12554_c1_1	NiFe_Group_1e	21_Jan_SF_Bin40	d__Bacteria;p__Proteobacteria;c__Gammaproteobacteria;o__Pseudomonadales;f__HTCC2089;g__;s__
8_1_Oct_SF_Bin66_scaffold_7601_c1_6	NiFe_Group_1e	8_1_Oct_SF_Bin66	d__Bacteria;p__Proteobacteria;c__Gammaproteobacteria;o__Pseudomonadales;f__HTCC2089;g__;s__
8_1_Jan_SF_Bin1_scaffold_21226_c1_1	NiFe_Group_3b	8_1_Jan_SF_Bin1	d__Bacteria;p__Proteobacteria;c__Gammaproteobacteria;o__S140-43;f__S140-43;g__;s__
8_1_Jan_SF_Bin100_scaffold_6301_c1_8	NiFe_Group_3b	8_1_Jan_SF_Bin100	d__Bacteria;p__Proteobacteria;c__Gammaproteobacteria;o__S140-43;f__S140-43;g__;s__
8_1_July_SF_Bin55_scaffold_6_c1_182	NiFe_Group_3b	8_1_July_SF_Bin55	d__Bacteria;p__Proteobacteria;c__Gammaproteobacteria;o__S140-43;f__S140-43;g__;s__
4_1_Jan_SF_Bin43_4_1_Jan_bin_43_scaffold_10096_c1_4	NiFe_Group_3d	4_1_Jan_SF_Bin43	d__Bacteria;p__Proteobacteria;c__Gammaproteobacteria;o__Steroidobacterales;f__Steroidobacteraceae;g__RPQJ01;s__
4_1_Jan_SF_Bin43_4_1_Jan_bin_43_scaffold_16805_c1_2	NiFe_Group_1d	4_1_Jan_SF_Bin43	d__Bacteria;p__Proteobacteria;c__Gammaproteobacteria;o__Steroidobacterales;f__Steroidobacteraceae;g__RPQJ01;s__
4_1_Jan_SF_Bin60_4_1_Jan_bin_60_scaffold_15264_c1_5	NiFe_Group_1d	4_1_Jan_SF_Bin60	d__Bacteria;p__Proteobacteria;c__Gammaproteobacteria;o__Steroidobacterales;f__Steroidobacteraceae;g__RPQJ01;s__
4_1_Jan_SF_Bin60_4_1_Jan_bin_60_scaffold_209_c1_37	NiFe_Group_3d	4_1_Jan_SF_Bin60	d__Bacteria;p__Proteobacteria;c__Gammaproteobacteria;o__Steroidobacterales;f__Steroidobacteraceae;g__RPQJ01;s__
4_1_Jan_SF_Bin60_4_1_Jan_bin_60_scaffold_333_c1_27	NiFe_Group_1e	4_1_Jan_SF_Bin60	d__Bacteria;p__Proteobacteria;c__Gammaproteobacteria;o__Steroidobacterales;f__Steroidobacteraceae;g__RPQJ01;s__
4_1_Jan_SF_Bin60_4_1_Jan_bin_60_scaffold_928_c1_3	NiFe_Group_1d	4_1_Jan_SF_Bin60	d__Bacteria;p__Proteobacteria;c__Gammaproteobacteria;o__Steroidobacterales;f__Steroidobacteraceae;g__RPQJ01;s__
4_1_May_SF_Bin43_scaffold_500_c1_16	NiFe_Group_3d	4_1_May_SF_Bin43	d__Bacteria;p__Proteobacteria;c__Gammaproteobacteria;o__Steroidobacterales;f__Steroidobacteraceae;g__RPQJ01;s__
4_1_May_SF_Bin43_scaffold_8843_c1_2	NiFe_Group_1d	4_1_May_SF_Bin43	d__Bacteria;p__Proteobacteria;c__Gammaproteobacteria;o__Steroidobacterales;f__Steroidobacteraceae;g__RPQJ01;s__
4_1_May_SF_Bin43_scaffold_977_c1_11	NiFe_Group_1e	4_1_May_SF_Bin43	d__Bacteria;p__Proteobacteria;c__Gammaproteobacteria;o__Steroidobacterales;f__Steroidobacteraceae;g__RPQJ01;s__
4_1_May_SF_Bin67_scaffold_16066_c1_5	NiFe_Group_1d	4_1_May_SF_Bin67	d__Bacteria;p__Proteobacteria;c__Gammaproteobacteria;o__Steroidobacterales;f__Steroidobacteraceae;g__RPQJ01;s__
4_1_May_SF_Bin67_scaffold_17397_c1_2	NiFe_Group_3d	4_1_May_SF_Bin67	d__Bacteria;p__Proteobacteria;c__Gammaproteobacteria;o__Steroidobacterales;f__Steroidobacteraceae;g__RPQJ01;s__
4_1_Oct_SF_Bin42_scaffold_12094_c1_4	NiFe_Group_1d	4_1_Oct_SF_Bin42	d__Bacteria;p__Proteobacteria;c__Gammaproteobacteria;o__Steroidobacterales;f__Steroidobacteraceae;g__RPQJ01;s__
4_1_Oct_SF_Bin42_scaffold_142_c1_49	NiFe_Group_3d	4_1_Oct_SF_Bin42	d__Bacteria;p__Proteobacteria;c__Gammaproteobacteria;o__Steroidobacterales;f__Steroidobacteraceae;g__RPQJ01;s__
4_1_Oct_SF_Bin42_scaffold_1500_c1_3	NiFe_Group_1d	4_1_Oct_SF_Bin42	d__Bacteria;p__Proteobacteria;c__Gammaproteobacteria;o__Steroidobacterales;f__Steroidobacteraceae;g__RPQJ01;s__
4_1_Oct_SF_Bin42_scaffold_342_c1_13	NiFe_Group_1e	4_1_Oct_SF_Bin42	d__Bacteria;p__Proteobacteria;c__Gammaproteobacteria;o__Steroidobacterales;f__Steroidobacteraceae;g__RPQJ01;s__
4_1_Oct_SF_Bin42_scaffold_837_c1_17	NiFe_Group_1d	4_1_Oct_SF_Bin42	d__Bacteria;p__Proteobacteria;c__Gammaproteobacteria;o__Steroidobacterales;f__Steroidobacteraceae;g__RPQJ01;s__
4_1_Oct_SF_Bin43_scaffold_12115_c1_3	NiFe_Group_3d	4_1_Oct_SF_Bin43	d__Bacteria;p__Proteobacteria;c__Gammaproteobacteria;o__Steroidobacterales;f__Steroidobacteraceae;g__RPQJ01;s__
4_1_Oct_SF_Bin43_scaffold_7320_c1_5	NiFe_Group_1d	4_1_Oct_SF_Bin43	d__Bacteria;p__Proteobacteria;c__Gammaproteobacteria;o__Steroidobacterales;f__Steroidobacteraceae;g__RPQJ01;s__
8_1_Jan_SF_Bin23_scaffold_13_c1_38	NiFe_Group_1e	8_1_Jan_SF_Bin23	d__Bacteria;p__Proteobacteria;c__Gammaproteobacteria;o__SZUA-152;f__SZUA-152;g__;s__
8_1_Oct_SF_Bin98_scaffold_77_c1_16	NiFe_Group_1e	8_1_Oct_SF_Bin98	d__Bacteria;p__Proteobacteria;c__Gammaproteobacteria;o__SZUA-152;f__SZUA-152;g__;s__
8_1_Jan_SF_Bin56_scaffold_136_c1_58	NiFe_Group_3b	8_1_Jan_SF_Bin56	d__Bacteria;p__Proteobacteria;c__Gammaproteobacteria;o__SZUA-229;f__SZUA-229;g__SZUA-116;s__
8_1_July_SF_Bin66_scaffold_634_c1_16	NiFe_Group_3b	8_1_July_SF_Bin66	d__Bacteria;p__Proteobacteria;c__Gammaproteobacteria;o__SZUA-229;f__SZUA-229;g__SZUA-116;s__
13_Jan_SF_Bin42_scaffold_26179_c1_1	NiFe_Group_3d	13_Jan_SF_Bin42	d__Bacteria;p__Proteobacteria;c__Gammaproteobacteria;o__Thiohalomonadales;f__Thiohalomonadaceae;g__;s__
13_Jan_SF_Bin42_scaffold_6817_c1_5	NiFe_Group_3d	13_Jan_SF_Bin42	d__Bacteria;p__Proteobacteria;c__Gammaproteobacteria;o__Thiohalomonadales;f__Thiohalomonadaceae;g__;s__
13_Jan_SF_Bin42_scaffold_860_c1_9	NiFe_Group_1e	13_Jan_SF_Bin42	d__Bacteria;p__Proteobacteria;c__Gammaproteobacteria;o__Thiohalomonadales;f__Thiohalomonadaceae;g__;s__
24_May_SF_Bin29_scaffold_2084_c1_4	NiFe_Group_1c	24_May_SF_Bin29	d__Bacteria;p__Proteobacteria;c__Gammaproteobacteria;o__UBA6429;f__UBA6429;g__;s__
24_May_SF_Bin29_scaffold_8024_c1_2	NiFe_Group_3b	24_May_SF_Bin29	d__Bacteria;p__Proteobacteria;c__Gammaproteobacteria;o__UBA6429;f__UBA6429;g__;s__
8_1_July_SF_Bin57_scaffold_24167_c1_2	NiFe_Group_3b	8_1_July_SF_Bin57	d__Bacteria;p__Proteobacteria;c__Gammaproteobacteria;o__UBA6429;f__UBA6429;g__;s__
8_1_July_SF_Bin57_scaffold_965_c1_4	NiFe_Group_3b	8_1_July_SF_Bin57	d__Bacteria;p__Proteobacteria;c__Gammaproteobacteria;o__UBA6429;f__UBA6429;g__;s__
13_July_SF_Bin31_scaffold_6543_c1_2	NiFe_Group_3b	13_July_SF_Bin31	d__Bacteria;p__Proteobacteria;c__Gammaproteobacteria;o__UBA9214;f__UBA9214;g__SZUA-186;s__
21_Oct_SF_Bin2_scaffold_10281_c1_1	NiFe_Group_1e	21_Oct_SF_Bin2	d__Bacteria;p__Proteobacteria;c__Gammaproteobacteria;o__UBA9214;f__UBA9214;g__SZUA-186;s__
21_Oct_SF_Bin2_scaffold_16981_c1_1	NiFe_Group_3d	21_Oct_SF_Bin2	d__Bacteria;p__Proteobacteria;c__Gammaproteobacteria;o__UBA9214;f__UBA9214;g__SZUA-186;s__
24_Jan_SF_Bin14_scaffold_13238_c1_1	NiFe_Group_3b	24_Jan_SF_Bin14	d__Bacteria;p__Proteobacteria;c__Gammaproteobacteria;o__UBA9214;f__UBA9214;g__SZUA-186;s__
24_Jan_SF_Bin14_scaffold_13296_c1_1	NiFe_Group_1e	24_Jan_SF_Bin14	d__Bacteria;p__Proteobacteria;c__Gammaproteobacteria;o__UBA9214;f__UBA9214;g__SZUA-186;s__
24_Jan_SF_Bin14_scaffold_8078_c1_3	NiFe_Group_1e	24_Jan_SF_Bin14	d__Bacteria;p__Proteobacteria;c__Gammaproteobacteria;o__UBA9214;f__UBA9214;g__SZUA-186;s__
21_May_SF_Bin27_scaffold_10378_c1_1	NiFe_Group_3d	21_May_SF_Bin27	d__Bacteria;p__Proteobacteria;c__Gammaproteobacteria;o__UBA9214;f__UBA9214;g__UBA9214;s__
21_May_SF_Bin27_scaffold_10693_c1_3	NiFe_Group_1e	21_May_SF_Bin27	d__Bacteria;p__Proteobacteria;c__Gammaproteobacteria;o__UBA9214;f__UBA9214;g__UBA9214;s__
21_May_SF_Bin27_scaffold_1249_c1_1	NiFe_Group_3d	21_May_SF_Bin27	d__Bacteria;p__Proteobacteria;c__Gammaproteobacteria;o__UBA9214;f__UBA9214;g__UBA9214;s__
24_July_SF_Bin20_scaffold_11866_c1_3	NiFe_Group_1e	24_July_SF_Bin20	d__Bacteria;p__Proteobacteria;c__Gammaproteobacteria;o__UBA9214;f__UBA9214;g__UBA9214;s__
24_July_SF_Bin20_scaffold_2467_c1_4	NiFe_Group_3d	24_July_SF_Bin20	d__Bacteria;p__Proteobacteria;c__Gammaproteobacteria;o__UBA9214;f__UBA9214;g__UBA9214;s__
24_May_SF_Bin18_scaffold_30_c1_53	NiFe_Group_1e	24_May_SF_Bin18	d__Bacteria;p__Proteobacteria;c__Gammaproteobacteria;o__UBA9214;f__UBA9214;g__UBA9214;s__
24_May_SF_Bin19_scaffold_1916_c1_4	NiFe_Group_3d	24_May_SF_Bin19	d__Bacteria;p__Proteobacteria;c__Gammaproteobacteria;o__UBA9214;f__UBA9214;g__UBA9214;s__
24_May_SF_Bin19_scaffold_8428_c1_2	NiFe_Group_1e	24_May_SF_Bin19	d__Bacteria;p__Proteobacteria;c__Gammaproteobacteria;o__UBA9214;f__UBA9214;g__UBA9214;s__
24_Oct_SF_Bin33_scaffold_14308_c1_1	NiFe_Group_1e	24_Oct_SF_Bin33	d__Bacteria;p__Proteobacteria;c__Gammaproteobacteria;o__UBA9214;f__UBA9214;g__UBA9214;s__
8_1_July_SF_Bin11_scaffold_1977_c1_3	NiFe_Group_1e	8_1_July_SF_Bin11	d__Bacteria;p__Proteobacteria;c__Gammaproteobacteria;o__UBA9214;f__UBA9214;g__UBA9214;s__
4_1_Jan_SF_Bin26_4_1_Jan_bin_26_scaffold_1782_c1_13	NiFe_Group_1e	4_1_Jan_SF_Bin26	d__Bacteria;p__Proteobacteria;c__Gammaproteobacteria;o__Woeseiales;f__Woeseiaceae;g__;s__
4_1_May_SF_Bin35_scaffold_1471_c1_15	NiFe_Group_1d	4_1_May_SF_Bin35	d__Bacteria;p__Proteobacteria;c__Gammaproteobacteria;o__Woeseiales;f__Woeseiaceae;g__;s__
4_1_May_SF_Bin35_scaffold_2451_c1_9	NiFe_Group_1e	4_1_May_SF_Bin35	d__Bacteria;p__Proteobacteria;c__Gammaproteobacteria;o__Woeseiales;f__Woeseiaceae;g__;s__
4_1_Oct_SF_Bin22_scaffold_1854_c1_11	NiFe_Group_1e	4_1_Oct_SF_Bin22	d__Bacteria;p__Proteobacteria;c__Gammaproteobacteria;o__Woeseiales;f__Woeseiaceae;g__;s__
4_1_Jan_SF_Bin32_4_1_Jan_bin_32_scaffold_406_c1_2	NiFe_Group_1e	4_1_Jan_SF_Bin32	d__Bacteria;p__Proteobacteria;c__Gammaproteobacteria;o__Woeseiales;f__Woeseiaceae;g__IDS-8;s__
4_1_May_SF_Bin44_scaffold_137_c1_30	NiFe_Group_1e	4_1_May_SF_Bin44	d__Bacteria;p__Proteobacteria;c__Gammaproteobacteria;o__Woeseiales;f__Woeseiaceae;g__IDS-8;s__
4_1_Oct_SF_Bin50_scaffold_66_c1_42	NiFe_Group_1e	4_1_Oct_SF_Bin50	d__Bacteria;p__Proteobacteria;c__Gammaproteobacteria;o__Woeseiales;f__Woeseiaceae;g__IDS-8;s__
8_1_July_SF_Bin46_scaffold_6610_c1_4	NiFe_Group_1e	8_1_July_SF_Bin46	d__Bacteria;p__Proteobacteria;c__Gammaproteobacteria;o__Woeseiales;f__Woeseiaceae;g__IDS-8;s__
13_July_SF_Bin18_scaffold_4459_c1_8	NiFe_Group_1e	13_July_SF_Bin18	d__Bacteria;p__Proteobacteria;c__Gammaproteobacteria;o__Woeseiales;f__Woeseiaceae;g__JAACFB01;s__
13_July_SF_Bin49_scaffold_1408_c1_18	NiFe_Group_1e	13_July_SF_Bin49	d__Bacteria;p__Proteobacteria;c__Gammaproteobacteria;o__Woeseiales;f__Woeseiaceae;g__JAACFB01;s__
13_May_SF_Bin22_scaffold_306_c1_28	NiFe_Group_1e	13_May_SF_Bin22	d__Bacteria;p__Proteobacteria;c__Gammaproteobacteria;o__Woeseiales;f__Woeseiaceae;g__JAACFB01;s__
13_May_SF_Bin53_scaffold_48_c1_86	NiFe_Group_1e	13_May_SF_Bin53	d__Bacteria;p__Proteobacteria;c__Gammaproteobacteria;o__Woeseiales;f__Woeseiaceae;g__JAACFB01;s__
13_May_SF_Bin93_scaffold_6147_c1_8	NiFe_Group_1e	13_May_SF_Bin93	d__Bacteria;p__Proteobacteria;c__Gammaproteobacteria;o__Woeseiales;f__Woeseiaceae;g__JAACFB01;s__
13_May_SF_Bin93_scaffold_8549_c1_4	NiFe_Group_1d	13_May_SF_Bin93	d__Bacteria;p__Proteobacteria;c__Gammaproteobacteria;o__Woeseiales;f__Woeseiaceae;g__JAACFB01;s__
21_Jan_SF_Bin38_scaffold_281_c1_35	NiFe_Group_1e	21_Jan_SF_Bin38	d__Bacteria;p__Proteobacteria;c__Gammaproteobacteria;o__Woeseiales;f__Woeseiaceae;g__JAACFB01;s__
21_July_SF_Bin13_scaffold_369_c1_8	NiFe_Group_1e	21_July_SF_Bin13	d__Bacteria;p__Proteobacteria;c__Gammaproteobacteria;o__Woeseiales;f__Woeseiaceae;g__JAACFB01;s__
21_May_SF_Bin21_scaffold_748_c1_6	NiFe_Group_1e	21_May_SF_Bin21	d__Bacteria;p__Proteobacteria;c__Gammaproteobacteria;o__Woeseiales;f__Woeseiaceae;g__JAACFB01;s__
4_1_Jan_SF_Bin67_4_1_Jan_bin_67_scaffold_296_c1_3	NiFe_Group_1d	4_1_Jan_SF_Bin67	d__Bacteria;p__Proteobacteria;c__Gammaproteobacteria;o__Woeseiales;f__Woeseiaceae;g__JAACFB01;s__
4_1_May_SF_Bin74_scaffold_74_c1_14	NiFe_Group_1d	4_1_May_SF_Bin74	d__Bacteria;p__Proteobacteria;c__Gammaproteobacteria;o__Woeseiales;f__Woeseiaceae;g__JAACFB01;s__
4_1_Oct_SF_Bin24_scaffold_299_c1_22	NiFe_Group_1d	4_1_Oct_SF_Bin24	d__Bacteria;p__Proteobacteria;c__Gammaproteobacteria;o__Woeseiales;f__Woeseiaceae;g__JAACFB01;s__
21_Jan_SF_Bin14_scaffold_16591_c1_9	NiFe_Group_1d	21_Jan_SF_Bin14	d__Bacteria;p__Proteobacteria;c__Gammaproteobacteria;o__Woeseiales;f__Woeseiaceae;g__JAACFE01;s__JAACFE01 sp009937505
21_Jan_SF_Bin14_scaffold_39044_c1_3	NiFe_Group_1e	21_Jan_SF_Bin14	d__Bacteria;p__Proteobacteria;c__Gammaproteobacteria;o__Woeseiales;f__Woeseiaceae;g__JAACFE01;s__JAACFE01 sp009937505
21_Jan_SF_Bin14_scaffold_53200_c1_3	NiFe_Group_1d	21_Jan_SF_Bin14	d__Bacteria;p__Proteobacteria;c__Gammaproteobacteria;o__Woeseiales;f__Woeseiaceae;g__JAACFE01;s__JAACFE01 sp009937505
21_July_SF_Bin10_scaffold_1068_c1_2	NiFe_Group_1d	21_July_SF_Bin10	d__Bacteria;p__Proteobacteria;c__Gammaproteobacteria;o__Woeseiales;f__Woeseiaceae;g__JAACFE01;s__JAACFE01 sp009937505
21_July_SF_Bin10_scaffold_4098_c1_3	NiFe_Group_1e	21_July_SF_Bin10	d__Bacteria;p__Proteobacteria;c__Gammaproteobacteria;o__Woeseiales;f__Woeseiaceae;g__JAACFE01;s__JAACFE01 sp009937505
21_July_SF_Bin10_scaffold_967_c1_1	NiFe_Group_1e	21_July_SF_Bin10	d__Bacteria;p__Proteobacteria;c__Gammaproteobacteria;o__Woeseiales;f__Woeseiaceae;g__JAACFE01;s__JAACFE01 sp009937505
21_May_SF_Bin39_scaffold_1717_c1_1	NiFe_Group_1e	21_May_SF_Bin39	d__Bacteria;p__Proteobacteria;c__Gammaproteobacteria;o__Woeseiales;f__Woeseiaceae;g__JAACFE01;s__JAACFE01 sp009937505
21_May_SF_Bin39_scaffold_52_c1_1	NiFe_Group_1d	21_May_SF_Bin39	d__Bacteria;p__Proteobacteria;c__Gammaproteobacteria;o__Woeseiales;f__Woeseiaceae;g__JAACFE01;s__JAACFE01 sp009937505
21_Oct_SF_Bin29_scaffold_119_c1_4	NiFe_Group_1d	21_Oct_SF_Bin29	d__Bacteria;p__Proteobacteria;c__Gammaproteobacteria;o__Woeseiales;f__Woeseiaceae;g__JAACFE01;s__JAACFE01 sp009937505
21_Oct_SF_Bin29_scaffold_137_c1_8	NiFe_Group_1e	21_Oct_SF_Bin29	d__Bacteria;p__Proteobacteria;c__Gammaproteobacteria;o__Woeseiales;f__Woeseiaceae;g__JAACFE01;s__JAACFE01 sp009937505
24_Jan_SF_Bin7_scaffold_33_c1_4	NiFe_Group_1d	24_Jan_SF_Bin7	d__Bacteria;p__Proteobacteria;c__Gammaproteobacteria;o__Woeseiales;f__Woeseiaceae;g__JAACFE01;s__JAACFE01 sp009937505
24_Jan_SF_Bin7_scaffold_37_c1_35	NiFe_Group_1e	24_Jan_SF_Bin7	d__Bacteria;p__Proteobacteria;c__Gammaproteobacteria;o__Woeseiales;f__Woeseiaceae;g__JAACFE01;s__JAACFE01 sp009937505
24_July_SF_Bin19_scaffold_1280_c1_2	NiFe_Group_1d	24_July_SF_Bin19	d__Bacteria;p__Proteobacteria;c__Gammaproteobacteria;o__Woeseiales;f__Woeseiaceae;g__JAACFE01;s__JAACFE01 sp009937505
24_May_SF_Bin26_scaffold_16551_c1_2	NiFe_Group_1e	24_May_SF_Bin26	d__Bacteria;p__Proteobacteria;c__Gammaproteobacteria;o__Woeseiales;f__Woeseiaceae;g__JAACFE01;s__JAACFE01 sp009937505
24_May_SF_Bin26_scaffold_4681_c1_3	NiFe_Group_1d	24_May_SF_Bin26	d__Bacteria;p__Proteobacteria;c__Gammaproteobacteria;o__Woeseiales;f__Woeseiaceae;g__JAACFE01;s__JAACFE01 sp009937505
24_Oct_SF_Bin22_scaffold_1156_c1_1	NiFe_Group_1e	24_Oct_SF_Bin22	d__Bacteria;p__Proteobacteria;c__Gammaproteobacteria;o__Woeseiales;f__Woeseiaceae;g__JAACFE01;s__JAACFE01 sp009937505
24_Oct_SF_Bin22_scaffold_5232_c1_1	NiFe_Group_1e	24_Oct_SF_Bin22	d__Bacteria;p__Proteobacteria;c__Gammaproteobacteria;o__Woeseiales;f__Woeseiaceae;g__JAACFE01;s__JAACFE01 sp009937505
24_Oct_SF_Bin22_scaffold_525_c1_19	NiFe_Group_1d	24_Oct_SF_Bin22	d__Bacteria;p__Proteobacteria;c__Gammaproteobacteria;o__Woeseiales;f__Woeseiaceae;g__JAACFE01;s__JAACFE01 sp009937505
13_July_SF_Bin51_scaffold_14499_c1_3	NiFe_Group_1e	13_July_SF_Bin51	d__Bacteria;p__Proteobacteria;c__Gammaproteobacteria;o__Woeseiales;f__Woeseiaceae;g__SZUA-117;s__
24_Oct_SF_Bin26_scaffold_30171_c1_1	NiFe_Group_1e	24_Oct_SF_Bin26	d__Bacteria;p__Proteobacteria;c__Gammaproteobacteria;o__Woeseiales;f__Woeseiaceae;g__SZUA-117;s__
24_Oct_SF_Bin26_scaffold_8049_c1_4	NiFe_Group_1e	24_Oct_SF_Bin26	d__Bacteria;p__Proteobacteria;c__Gammaproteobacteria;o__Woeseiales;f__Woeseiaceae;g__SZUA-117;s__
4_1_Jan_SF_Bin31_4_1_Jan_bin_31_scaffold_14800_c1_1	NiFe_Group_1e	4_1_Jan_SF_Bin31	d__Bacteria;p__Proteobacteria;c__Gammaproteobacteria;o__Woeseiales;f__Woeseiaceae;g__SZUA-117;s__
4_1_Jan_SF_Bin31_4_1_Jan_bin_31_scaffold_26526_c1_2	NiFe_Group_1d	4_1_Jan_SF_Bin31	d__Bacteria;p__Proteobacteria;c__Gammaproteobacteria;o__Woeseiales;f__Woeseiaceae;g__SZUA-117;s__
13_July_SF_Bin23_scaffold_1117_c1_13	NiFe_Group_1e	13_July_SF_Bin23_2	d__Bacteria;p__Proteobacteria;c__Gammaproteobacteria;o__Woeseiales;f__Woeseiaceae;g__UBA1847;s__
13_July_SF_Bin23_scaffold_4001_c1_1	NiFe_Group_1d	13_July_SF_Bin23_2	d__Bacteria;p__Proteobacteria;c__Gammaproteobacteria;o__Woeseiales;f__Woeseiaceae;g__UBA1847;s__
13_July_SF_Bin23_scaffold_4001_c1_8	NiFe_Group_1e	13_July_SF_Bin23_2	d__Bacteria;p__Proteobacteria;c__Gammaproteobacteria;o__Woeseiales;f__Woeseiaceae;g__UBA1847;s__
13_July_SF_Bin23_scaffold_579_c1_14	NiFe_Group_1e	13_July_SF_Bin23_1	d__Bacteria;p__Proteobacteria;c__Gammaproteobacteria;o__Woeseiales;f__Woeseiaceae;g__UBA1847;s__
13_May_SF_Bin65_scaffold_962_c1_7	NiFe_Group_1e	13_May_SF_Bin65	d__Bacteria;p__Proteobacteria;c__Gammaproteobacteria;o__Woeseiales;f__Woeseiaceae;g__UBA1847;s__
13_May_SF_Bin98_scaffold_343_c1_7	NiFe_Group_1e	13_May_SF_Bin98	d__Bacteria;p__Proteobacteria;c__Gammaproteobacteria;o__Woeseiales;f__Woeseiaceae;g__UBA1847;s__
13_Oct_SF_Bin17_scaffold_27286_c1_1	NiFe_Group_1e	13_Oct_SF_Bin17	d__Bacteria;p__Proteobacteria;c__Gammaproteobacteria;o__Woeseiales;f__Woeseiaceae;g__UBA1847;s__
21_Jan_SF_Bin42_scaffold_2027_c1_9	NiFe_Group_1e	21_Jan_SF_Bin42	d__Bacteria;p__Proteobacteria;c__Gammaproteobacteria;o__Woeseiales;f__Woeseiaceae;g__UBA1847;s__
21_July_SF_Bin22_scaffold_15203_c1_1	NiFe_Group_1e	21_July_SF_Bin22	d__Bacteria;p__Proteobacteria;c__Gammaproteobacteria;o__Woeseiales;f__Woeseiaceae;g__UBA1847;s__
21_May_SF_Bin26_scaffold_14326_c1_1	NiFe_Group_1e	21_May_SF_Bin26	d__Bacteria;p__Proteobacteria;c__Gammaproteobacteria;o__Woeseiales;f__Woeseiaceae;g__UBA1847;s__
21_Oct_SF_Bin28_scaffold_12065_c1_2	NiFe_Group_1e	21_Oct_SF_Bin28	d__Bacteria;p__Proteobacteria;c__Gammaproteobacteria;o__Woeseiales;f__Woeseiaceae;g__UBA1847;s__
4_1_Jan_SF_Bin34_4_1_Jan_bin_34_scaffold_435_c1_19	NiFe_Group_1d	4_1_Jan_SF_Bin34	d__Bacteria;p__Proteobacteria;c__Gammaproteobacteria;o__Woeseiales;f__Woeseiaceae;g__UBA1847;s__
4_1_May_SF_Bin72_scaffold_691_c1_18	NiFe_Group_1d	4_1_May_SF_Bin72	d__Bacteria;p__Proteobacteria;c__Gammaproteobacteria;o__Woeseiales;f__Woeseiaceae;g__UBA1847;s__
4_1_Oct_SF_Bin55_scaffold_322_c1_14	NiFe_Group_1d	4_1_Oct_SF_Bin55	d__Bacteria;p__Proteobacteria;c__Gammaproteobacteria;o__Woeseiales;f__Woeseiaceae;g__UBA1847;s__
8_1_Jan_SF_Bin85_scaffold_1571_c1_6	NiFe_Group_1e	8_1_Jan_SF_Bin85	d__Bacteria;p__Proteobacteria;c__Gammaproteobacteria;o__Woeseiales;f__Woeseiaceae;g__UBA1847;s__
8_1_July_SF_Bin65_scaffold_3800_c1_1	NiFe_Group_1d	8_1_July_SF_Bin65	d__Bacteria;p__Proteobacteria;c__Gammaproteobacteria;o__Woeseiales;f__Woeseiaceae;g__UBA1847;s__
8_1_July_SF_Bin65_scaffold_4274_c1_11	NiFe_Group_1d	8_1_July_SF_Bin65	d__Bacteria;p__Proteobacteria;c__Gammaproteobacteria;o__Woeseiales;f__Woeseiaceae;g__UBA1847;s__
8_1_July_SF_Bin68_scaffold_2253_c1_5	NiFe_Group_1d	8_1_July_SF_Bin68	d__Bacteria;p__Proteobacteria;c__Gammaproteobacteria;o__Woeseiales;f__Woeseiaceae;g__UBA1847;s__
8_1_July_SF_Bin69_scaffold_421_c1_35	NiFe_Group_1e	8_1_July_SF_Bin69	d__Bacteria;p__Proteobacteria;c__Gammaproteobacteria;o__Woeseiales;f__Woeseiaceae;g__UBA1847;s__
8_1_July_SF_Bin69_scaffold_8462_c1_4	NiFe_Group_1e	8_1_July_SF_Bin69	d__Bacteria;p__Proteobacteria;c__Gammaproteobacteria;o__Woeseiales;f__Woeseiaceae;g__UBA1847;s__
21_May_SF_Bin5_scaffold_8247_c1_2	NiFe_Group_1e	21_May_SF_Bin5	d__Bacteria;p__Proteobacteria;c__Gammaproteobacteria;o__Xanthomonadales;f__SZUA-36;g__JABDPF01;s__
24_July_SF_Bin2_scaffold_2056_c1_3	NiFe_Group_1e	24_July_SF_Bin2	d__Bacteria;p__Proteobacteria;c__Gammaproteobacteria;o__Xanthomonadales;f__SZUA-36;g__JABDPF01;s__
24_May_SF_Bin1_scaffold_6198_c1_1	NiFe_Group_1e	24_May_SF_Bin1	d__Bacteria;p__Proteobacteria;c__Gammaproteobacteria;o__Xanthomonadales;f__SZUA-36;g__JABDPF01;s__
24_Oct_SF_Bin28_scaffold_1762_c1_7	NiFe_Group_1e	24_Oct_SF_Bin28	d__Bacteria;p__Proteobacteria;c__Gammaproteobacteria;o__Xanthomonadales;f__SZUA-36;g__JABDPF01;s__
24_Oct_SF_Bin28_scaffold_5815_c1_5	NiFe_Group_1c	24_Oct_SF_Bin28	d__Bacteria;p__Proteobacteria;c__Gammaproteobacteria;o__Xanthomonadales;f__SZUA-36;g__JABDPF01;s__
24_Oct_SF_Bin28_scaffold_740_c1_16	NiFe_Group_1c	24_Oct_SF_Bin28	d__Bacteria;p__Proteobacteria;c__Gammaproteobacteria;o__Xanthomonadales;f__SZUA-36;g__JABDPF01;s__
24_July_SF_Bin11_scaffold_15055_c1_1	NiFe_Group_1e	24_July_SF_Bin11	d__Bacteria;p__Proteobacteria;c__Gammaproteobacteria;o__Xanthomonadales;f__SZUA-36;g__SZUA-36;s__
24_July_SF_Bin11_scaffold_6478_c1_1	NiFe_Group_3d	24_July_SF_Bin11	d__Bacteria;p__Proteobacteria;c__Gammaproteobacteria;o__Xanthomonadales;f__SZUA-36;g__SZUA-36;s__
24_Oct_SF_Bin7_scaffold_1866_c1_4	NiFe_Group_3d	24_Oct_SF_Bin7	d__Bacteria;p__Proteobacteria;c__Gammaproteobacteria;o__Xanthomonadales;f__SZUA-36;g__SZUA-36;s__
24_Oct_SF_Bin7_scaffold_509_c1_9	NiFe_Group_1e	24_Oct_SF_Bin7	d__Bacteria;p__Proteobacteria;c__Gammaproteobacteria;o__Xanthomonadales;f__SZUA-36;g__SZUA-36;s__
24_Jan_SF_Bin3_scaffold_11442_c1_4	NiFe_Group_1d	24_Jan_SF_Bin3	d__Bacteria;p__Proteobacteria;c__Gammaproteobacteria;o__XN24;f__XN24;g__;s__
24_Jan_SF_Bin3_scaffold_8104_c1_3	NiFe_Group_1d	24_Jan_SF_Bin3	d__Bacteria;p__Proteobacteria;c__Gammaproteobacteria;o__XN24;f__XN24;g__;s__
24_Oct_SF_Bin43_scaffold_23509_c1_4	NiFe_Group_1d	24_Oct_SF_Bin43	d__Bacteria;p__Proteobacteria;c__Gammaproteobacteria;o__XN24;f__XN24;g__;s__
4_1_July_SF_Bin48_4_1_July_bin_48_scaffold_18506_c1_5	NiFe_Group_1d	4_1_July_SF_Bin48	d__Bacteria;p__SAR324;c__SAR324;o__SAR324;f__;g__;s__
4_1_July_SF_Bin48_4_1_July_bin_48_scaffold_18811_c1_3	NiFe_Group_1d	4_1_July_SF_Bin48	d__Bacteria;p__SAR324;c__SAR324;o__SAR324;f__;g__;s__
8_1_Oct_SF_Bin72_scaffold_2792_c1_5	NiFe_Group_1d	8_1_Oct_SF_Bin72	d__Bacteria;p__SAR324;c__SAR324;o__SAR324;f__;g__;s__
8_1_July_SF_Bin26_scaffold_3906_c1_11	NiFe_Group_1d	8_1_July_SF_Bin26	d__Bacteria;p__SAR324;c__SAR324;o__XYD2-FULL-50-16;f__XYD2-FULL-50-16;g__;s__
8_1_Oct_SF_Bin1_scaffold_66003_c1_2	NiFe_Group_3b	8_1_Oct_SF_Bin1	d__Bacteria;p__Spirochaetota;c__Leptospirae;o__Leptospirales;f__Leptonemataceae;g__;s__
4_1_July_SF_Bin25_4_1_July_bin_25_scaffold_1446_c1_2	NiFe_Group_1d	4_1_July_SF_Bin25	d__Bacteria;p__Spirochaetota;c__UBA6919;o__UBA6919;f__UBA6919;g__;s__
21_Jan_SF_Bin1_scaffold_18732_c1_2	NiFe_Group_3b	21_Jan_SF_Bin1	d__Bacteria;p__Tectomicrobia;c__Entotheonellia;o__Entotheonellales;f__Entotheonellaceae;g__;s__
8_1_Jan_SF_Bin108_scaffold_32169_c1_2	NiFe_Group_4g	8_1_Jan_SF_Bin108	d__Bacteria;p__UBA6262;c__UBA6262;o__WVXT01;f__WVXT01;g__WVXT01;s__
8_1_Oct_SF_Bin55_scaffold_15277_c1_5	NiFe_Group_4g	8_1_Oct_SF_Bin55	d__Bacteria;p__UBA6262;c__UBA6262;o__WVXT01;f__WVXT01;g__WVXT01;s__
24_Oct_SF_Bin18_scaffold_27411_c1_1	NiFe_Group_3d	24_Oct_SF_Bin18	d__Bacteria;p__Verrucomicrobiota;c__Kiritimatiellae;o__Kiritimatiellales;f__Pontiellaceae;g__Pontiella;s__
4_1_July_SF_Bin39_4_1_July_bin_39_scaffold_96_c1_6	NiFe_Group_3c	4_1_July_SF_Bin39	d__Bacteria;p__WOR-3;c__WOR-3;o__SM23-42;f__SM23-42;g__SM23-42;s__

## Sheet: FeFeHyd
NiFe Hydrogenase	Group	MAG	GTDBtk
13_Jan_SF_Bin1_scaffold_19042_c1_2	FeFe_Group_C3	13_Jan_SF_Bin1	d__Bacteria;p__Desulfobacterota;c__Desulfuromonadia;o__Desulfuromonadales;f__BM103;g__M0040;s__
13_May_SF_Bin21_scaffold_9931_c1_2	FeFe_Group_A3	13_May_SF_Bin21	d__Bacteria;p__Bacteroidota;c__Ignavibacteria;o__Ignavibacteriales;f__Ignavibacteriaceae;g__IGN2;s__
13_Oct_SF_Bin5_scaffold_21361_c1_1	FeFe_Group_C3	13_Oct_SF_Bin5	d__Bacteria;p__Desulfobacterota;c__Desulfuromonadia;o__Desulfuromonadales;f__BM103;g__M0040;s__
21_May_SF_Bin22_scaffold_20821_c1_1	FeFe_Group_C3	21_May_SF_Bin22	d__Bacteria;p__Desulfobacterota;c__Desulfuromonadia;o__Desulfuromonadales;f__BM103;g__M0040;s__
24_May_SF_Bin29_scaffold_22979_c1_1	FeFe_Group_A1	24_May_SF_Bin29	d__Bacteria;p__Proteobacteria;c__Gammaproteobacteria;o__UBA6429;f__UBA6429;g__;s__
24_Oct_SF_Bin20_scaffold_6403_c1_1	FeFe_Group_C3	24_Oct_SF_Bin20	d__Bacteria;p__Desulfobacterota;c__Desulfuromonadia;o__Desulfuromonadales;f__BM103;g__;s__
24_Oct_SF_Bin9_scaffold_1748_c1_1	FeFe_Group_C3	24_Oct_SF_Bin9	d__Bacteria;p__Desulfobacterota;c__Desulfuromonadia;o__Desulfuromonadales;f__BM103;g__M0040;s__
4_1_July_SF_Bin29_4_1_July_bin_29_scaffold_27170_c1_2	FeFe_Group_A3	4_1_July_SF_Bin29	d__Bacteria;p__Armatimonadota;c__CAIYQO01;o__WVXJ01;f__;g__;s__
4_1_July_SF_Bin55_4_1_July_bin_55_scaffold_12327_c1_1	FeFe_Group_A1	4_1_July_SF_Bin55	d__Bacteria;p__Desulfobacterota;c__SM23-61;o__SM23-61;f__SM23-61;g__JAHJQK01;s__
4_1_July_SF_Bin9_4_1_July_bin_9_scaffold_4955_c1_7	FeFe_Group_A1	4_1_July_SF_Bin9	d__Bacteria;p__Proteobacteria;c__Gammaproteobacteria;o__S140-43;f__S140-43;g__;s__
8_1_Jan_SF_Bin54_scaffold_387_c1_27	FeFe_Group_A1	8_1_Jan_SF_Bin54	d__Bacteria;p__Proteobacteria;c__Gammaproteobacteria;o__SZUA-229;f__SZUA-229;g__;s__
8_1_Jan_SF_Bin98_scaffold_6_c1_28	FeFe_Group_A1	8_1_Jan_SF_Bin98	d__Bacteria;p__Proteobacteria;c__Gammaproteobacteria;o__SZUA-229;f__SZUA-229;g__;s__
8_1_Oct_SF_Bin111_scaffold_14281_c1_1	FeFe_Group_A1	8_1_Oct_SF_Bin111	d__Bacteria;p__Proteobacteria;c__Gammaproteobacteria;o__UBA6429;f__UBA6429;g__;s__
