# Supplementary material for: Metabolic capacity is maintained despite shifts in microbial diversity in estuary sediments
Source: Research Square preprint supplement (doi:10.21203/rs.3.rs-2838418/v1), 2023-04-20
Supplement: Supplementary file 5 [file SupplementaryTable6.xlsx]

## Sheet: Caption
Supplementary Table 6. 139 marker genes present in 39 narG/nxrA-encoding SFB MAGs and 5 NOB genomes downloaded from NCBI. GTDBtk r207 taxonomy or published names are shown in the left column, as well as MAG or NCBI names. Gene names and IDs are shown in the top columns. Gene annotations were completed using the IMG Annotation Pipeline version 4.15.2, Interproscan v5.31-70.0, and eggNOG-mapper ver…

## Sheet: Sheet1
		1	2	3	4	5	6	7	8	9	10	11	12	13	14	15	16	17	18	19	20	21	22	23	24	25	26	27	28	29	30	31	32	33	34	35	36	37	38	39	40	41	42	43	44	45	46	47	48
		narG/nxrA	narH/nxrB	narG/nxrC	narL	narX	nirK	nirS	norQ	nosD	nosL	nosR	nosZ	NRT	ureC	ureAB	cld	ccmL	cynT	nuoA	nuoB	nuoC	nuoD	nuoE	nuoF	ndh	sdhA	sdhB	sdhC	sdhD	cydA	cydB	petB	petC	CYC1	MQCRA	MQCRB	MQCRC	CYTB	COX15	coxA	coxB	coxC	coxD	coxAC	cyoB	cyoC	ccoN	ccoO
		narG, narZ, nxrA; nitrate reductase / nitrite oxidoreductase, alpha subunit [EC:1.7.5.1 1.7.99.-]	narH, narY, nxrB; nitrate reductase / nitrite oxidoreductase, beta subunit [EC:1.7.5.1 1.7.99.-]	Nitrate reductase gamma subunit	narL; two-component system, NarL family, nitrate/nitrite response regulator NarL	narX; two-component system, NarL family, nitrate/nitrite sensor histidine kinase NarX [EC:2.7.13.3]	nirK; nitrite reductase (NO-forming) [EC:1.7.2.1]	nirS; nitrite reductase (NO-forming) / hydroxylamine reductase [EC:1.7.2.1 1.7.99.1]	norQ; nitric oxide reductase NorQ protein	nosD; nitrous oxidase accessory protein	nosL; copper chaperone NosL	nosR; NosR/NirI family transcriptional regulator, nitrous oxide reductase regulator	nosZ; nitrous-oxide reductase [EC:1.7.2.4]	NRT, narK, nrtP, nasA; MFS transporter, NNP family, nitrate/nitrite transporter	ureC; urease subunit alpha [EC:3.5.1.5]	ureAB; urease subunit gamma/beta [EC:3.5.1.5]	cld; chlorite dismutase [EC:1.13.11.49]	ccmL; carbon dioxide concentrating mechanism protein CcmL	cynT, can; carbonic anhydrase [EC:4.2.1.1]	nuoA; NADH-quinone oxidoreductase subunit A [EC:7.1.1.2]	nuoB; NADH-quinone oxidoreductase subunit B [EC:7.1.1.2]	nuoC; NADH-quinone oxidoreductase subunit C [EC:7.1.1.2]	nuoD; NADH-quinone oxidoreductase subunit D [EC:7.1.1.2]	nuoE; NADH-quinone oxidoreductase subunit E [EC:7.1.1.2]	nuoF; NADH-quinone oxidoreductase subunit F [EC:7.1.1.2]	ndh; NADH:ubiquinone reductase (H+-translocating) [EC:7.1.1.2]	sdhA, frdA; succinate dehydrogenase / fumarate reductase, flavoprotein subunit [EC:1.3.5.1 1.3.5.4]	sdhB, frdB; succinate dehydrogenase / fumarate reductase, iron-sulfur subunit [EC:1.3.5.1 1.3.5.4]	sdhC, frdC; succinate dehydrogenase / fumarate reductase, cytochrome b subunit	sdhD, frdD; succinate dehydrogenase / fumarate reductase, membrane anchor subunit	cydA; cytochrome bd ubiquinol oxidase subunit I [EC:7.1.1.7]	cydB; cytochrome bd ubiquinol oxidase subunit II [EC:7.1.1.7]	petB; cytochrome b6	petC; cytochrome b6-f complex iron-sulfur subunit [EC:7.1.1.6]	CYC1, CYT1, petC; ubiquinol-cytochrome c reductase cytochrome c1 subunit	MQCRA, qcrA, bfcA, petC; menaquinol-cytochrome c reductase iron-sulfur subunit [EC:1.10.2.-]	MQCRB, qcrB, bfcB, petB; menaquinol-cytochrome c reductase cytochrome b subunit	MQCRC, qcrC, bfcC, petD; menaquinol-cytochrome c reductase cytochrome b/c subunit	CYTB, petB; ubiquinol-cytochrome c reductase cytochrome b subunit	COX15, ctaA; heme a synthase [EC:1.17.99.9]	coxA, ctaD; cytochrome c oxidase subunit I [EC:7.1.1.9]	coxB, ctaC; cytochrome c oxidase subunit II [EC:7.1.1.9]	coxC, ctaE; cytochrome c oxidase subunit III [EC:7.1.1.9]	coxD, ctaF; cytochrome c oxidase subunit IV [EC:7.1.1.9]	coxAC; cytochrome c oxidase subunit I+III [EC:7.1.1.9]	cyoB; cytochrome o ubiquinol oxidase subunit I [EC:7.1.1.3]	cyoC; cytochrome o ubiquinol oxidase subunit III	ccoN; cytochrome c oxidase cbb3-type subunit I [EC:7.1.1.9]	ccoO; cytochrome c oxidase cbb3-type subunit II
	Row Labels	K00370	K00371	PF02665	K07684	K07673,COG3850	K00368	K15864	K04748	K07218	K19342	K19339	K00376	K02575	K01428	K14048	K09162	K08697	K01673	K00330	K00331	K00332	K00333	K00334	K00335	K03885	K00239	K00240	K00241	K00242	K00425	K00426	K02635	K02636	K00413	K03886	K03887	K03888	K00412	K02259	K02274	K02275	K02276	K02277	K15408	K02298	K02299	K00404	K00405
Nitrotoga_fabula	GCF_905221025.1	1	1	0	0	0	1	0	1	0	0	0	0	0	0	0	1	0	1	1	1	1	1	1	1	0	1	1	1	1	0	0	0	0	0	0	0	0	0	0	0	0	0	0	0	0	0	2	0
Acidobacteriota	13_May_SF_Bin61	2	1	0	0	0	0	0	0	0	0	0	0	0	0	0	0	0	0	0	1	1	1	0	1	1	2	3	1	0	0	0	0	0	0	0	0	0	0	0	2	2	1	1	0	0	0	0	0
Acidobacteriota	4_1_Jan_SF_Bin21	1	1	0	0	0	0	0	0	1	0	1	1	0	0	0	0	1	1	0	0	0	0	0	1	1	2	2	2	0	0	0	1	3	0	1	0	0	0	1	0	1	1	1	0	0	0	1	2
Actinobacteriota	21_Jan_SF_Bin67	1	1	0	0	1	2	0	0	0	0	0	0	0	0	0	0	2	3	2	2	1	1	1	4	2	1	1	1	0	1	1	0	1	1	0	0	0	0	1	2	2	0	0	0	1	1	0	0
Actinobacteriota	4_1_Jan_SF_Bin18	1	1	1	1	1	1	0	0	0	0	0	0	0	0	0	1	2	1	1	1	1	1	1	1	1	1	1	1	0	0	0	0	0	0	0	1	1	0	1	2	3	1	0	0	0	0	0	0
Actinobacteriota	4_1_Jan_SF_Bin61	2	1	0	1	0	0	0	0	0	0	0	0	0	0	0	1	0	0	0	1	1	1	1	1	1	1	1	1	0	0	0	0	0	0	0	1	0	0	0	2	1	1	0	0	0	0	0	0
Actinobacteriota	4_1_May_SF_Bin52	2	1	0	1	0	0	0	0	0	0	0	0	1	0	0	0	0	1	0	0	0	1	1	2	1	2	1	1	0	0	0	0	0	0	0	1	1	0	1	2	3	1	0	0	0	0	0	0
Actinobacteriota	4_1_May_SF_Bin55	1	1	1	1	1	1	0	0	0	0	0	0	0	0	0	1	2	1	1	1	1	1	1	1	1	1	1	1	0	0	0	0	0	0	0	1	1	0	1	2	2	1	0	0	0	0	0	0
Actinobacteriota	4_1_Oct_SF_Bin14	1	1	1	1	1	2	0	0	0	0	0	0	0	0	0	2	2	1	1	1	1	1	1	1	1	1	1	2	1	0	0	0	0	0	0	1	1	0	1	2	2	1	0	0	0	0	0	0
Actinobacteriota	4_1_Oct_SF_Bin32	2	0	0	0	0	0	0	0	0	0	0	0	0	0	0	1	0	1	1	1	0	0	0	2	1	1	0	0	0	0	0	0	0	0	0	1	1	0	1	2	2	0	0	0	0	0	0	0
Desulfobacterota_B	13_July_SF_Bin2	3	2	0	0	0	0	0	1	0	0	0	0	2	0	0	1	0	0	1	2	1	1	1	3	2	1	1	0	0	0	0	2	4	0	0	0	0	0	0	2	0	1	1	1	0	0	0	1
Nitronauta_litoralis	GCA_015698285.1	2	2	0	0	0	2	0	0	0	0	0	0	1	0	0	0	0	1	2	1	2	0	1	1	0	2	1	1	0	1	1	0	1	0	0	0	0	1	0	0	1	0	0	0	0	0	0	2
Nitrospinota	8_1_Oct_SF_Bin69	1	1	0	0	0	1	0	0	0	0	0	0	1	0	0	1	0	1	2	2	2	2	1	2	0	4	2	2	0	0	0	0	2	0	0	0	0	3	0	0	0	0	0	0	0	0	0	0
Gemmatimonadota	8_1_May_SF_Bin5	1	1	0	0	0	0	1	0	3	1	0	1	0	0	0	0	0	0	0	0	0	0	0	0	1	0	0	0	0	0	0	0	0	0	0	0	0	0	1	4	3	0	1	0	0	1	0	0
Nitrospirota	13_July_SF_Bin24	1	1	0	0	0	0	0	1	0	0	0	0	1	0	0	1	0	1	2	2	3	1	0	2	0	1	1	1	0	0	0	0	0	0	0	0	0	1	0	0	0	0	0	0	0	0	0	2
Nitrospirota	21_July_SF_Bin14	1	0	0	0	0	0	0	0	0	0	1	0	1	0	0	1	1	3	0	1	3	3	0	1	0	3	2	1	0	1	1	0	0	1	0	0	0	2	0	1	0	0	0	0	0	0	0	0
Nitrospirota	4_1_Jan_SF_Bin27	1	1	0	0	0	1	0	0	0	0	0	0	1	1	1	2	0	1	3	3	1	0	1	4	3	1	1	1	0	0	0	0	0	0	0	0	0	1	0	0	1	0	0	0	0	0	0	0
Nitrospirota	4_1_Jan_SF_Bin41	1	1	0	0	0	1	1	1	0	0	0	0	1	1	1	2	0	1	2	2	1	0	0	2	2	1	1	1	0	0	0	0	0	0	0	0	0	1	0	0	0	0	0	0	0	0	0	0
Nitrospirota	4_1_Jan_SF_Bin42	1	1	0	0	0	3	1	0	0	0	0	0	1	1	1	3	0	1	3	3	1	0	1	3	0	1	1	1	0	1	1	0	0	0	0	0	0	1	0	0	0	0	0	0	0	0	0	0
Nitrospirota	4_1_Jan_SF_Bin53	1	1	0	0	0	2	1	1	0	0	0	0	1	0	0	3	0	0	3	3	1	0	1	3	3	1	1	1	0	0	0	0	0	0	0	0	0	1	0	0	0	0	0	0	0	0	0	0
Nitrospirota	4_1_July_SF_Bin50	1	1	0	0	0	3	1	1	0	0	0	0	1	1	1	2	0	2	3	3	1	0	1	3	0	1	1	1	0	1	1	0	0	0	0	0	0	1	0	0	0	0	0	0	0	0	0	0
Nitrospirota	4_1_July_SF_Bin53	1	1	0	0	0	1	0	1	0	0	0	0	1	1	1	3	0	1	3	3	1	0	1	3	3	1	1	1	0	0	0	0	0	0	0	0	0	1	0	0	1	0	0	0	0	0	0	0
Nitrospirota	4_1_May_SF_Bin36	1	1	0	0	0	1	1	1	0	0	0	0	1	0	0	2	0	0	3	3	1	0	1	4	4	1	1	1	0	0	0	0	0	0	0	0	0	1	0	0	0	0	0	0	0	0	0	0
Nitrospirota	4_1_May_SF_Bin53	1	1	0	0	0	3	1	1	0	0	0	0	1	1	1	3	0	2	3	3	1	0	1	3	0	1	1	1	0	0	1	0	0	0	0	0	0	1	0	0	0	0	0	0	0	0	0	0
Nitrospirota	4_1_May_SF_Bin59	1	1	0	0	0	1	0	0	0	0	0	0	1	1	1	2	0	1	3	3	1	0	1	3	3	1	1	1	0	0	0	0	0	0	0	0	0	1	0	0	1	0	0	0	0	0	0	0
Nitrospirota	4_1_May_SF_Bin6	2	1	0	0	0	2	0	1	0	0	0	0	0	1	0	1	0	0	2	2	1	0	0	2	1	2	1	1	0	0	0	0	0	0	0	0	0	1	0	0	0	0	0	0	0	0	0	0
Nitrospirota	4_1_May_SF_Bin63	1	1	0	0	0	1	1	1	0	0	0	0	1	1	1	2	0	1	2	2	1	0	1	2	2	1	1	1	0	0	0	0	0	0	0	0	0	1	0	0	0	0	0	0	0	0	0	0
Nitrospirota	4_1_Oct_SF_Bin23	2	1	0	0	0	2	0	1	0	0	0	0	1	1	1	2	0	1	3	3	1	0	1	3	3	1	1	1	0	0	0	0	0	0	0	0	0	1	0	0	1	0	0	0	0	0	0	0
Nitrospirota	4_1_Oct_SF_Bin26	1	1	0	0	0	1	0	1	0	0	0	0	1	1	1	2	0	0	2	2	1	0	0	2	2	1	1	1	0	0	0	0	0	0	0	0	0	1	0	0	0	0	0	0	0	0	0	0
Nitrospirota	4_1_Oct_SF_Bin30	1	1	0	0	0	3	1	1	0	0	0	0	1	1	1	3	0	2	3	3	1	0	1	3	0	1	1	1	0	1	1	0	0	0	0	0	0	1	0	0	0	0	0	0	0	0	0	0
Nitrospirota	4_1_Oct_SF_Bin52	1	1	0	0	0	1	1	1	0	0	0	0	1	1	1	2	0	0	3	3	1	0	1	3	5	1	1	1	0	0	0	0	0	0	0	0	0	1	0	0	0	0	0	0	0	0	0	0
Nitrospirota	4_1_Oct_SF_Bin9	2	1	0	0	0	2	0	0	0	0	0	0	0	0	0	3	0	0	2	2	1	0	0	2	1	2	1	1	0	0	0	0	0	0	0	0	0	1	0	0	0	0	0	0	0	0	0	0
Nitrospirota	8_1_Jan_SF_Bin68	1	2	0	0	0	1	0	2	0	0	0	0	1	0	0	1	0	1	2	2	1	0	0	3	1	2	2	1	0	1	1	0	0	0	1	0	0	2	0	0	0	0	0	0	0	0	0	4
Nitrospirota	8_1_July_SF_Bin45	1	1	0	0	0	1	1	1	0	0	0	0	1	1	1	2	0	1	2	2	1	0	1	2	2	1	1	1	0	0	0	0	0	0	0	0	0	1	0	0	0	0	0	0	0	0	0	0
Nitrospirota	8_1_July_SF_Bin60	1	1	0	0	0	1	0	1	0	0	0	0	1	0	0	2	0	1	1	2	1	0	0	2	0	1	1	1	0	0	1	0	0	0	1	0	0	2	0	0	0	0	0	0	0	0	0	0
Nitrospirota	8_1_July_SF_Bin61	1	0	0	0	0	1	0	1	0	0	0	0	1	0	0	2	0	0	1	1	1	0	0	2	0	0	0	0	0	2	1	0	0	0	0	0	0	1	0	0	0	0	0	0	0	0	0	0
Nitrospirota	8_1_Oct_SF_Bin26	1	1	0	0	0	1	1	1	0	0	0	0	1	1	1	2	0	1	2	3	1	0	0	2	2	1	1	1	0	0	0	0	0	0	0	0	0	1	0	0	0	0	0	0	0	0	0	0
Nitrospirota	8_1_Oct_SF_Bin49	1	2	0	0	0	0	0	1	0	0	0	0	0	0	0	1	0	0	2	2	1	1	0	2	0	0	1	1	0	0	0	0	0	0	0	0	0	1	0	0	0	0	0	0	0	0	0	1
Nitrospirota	8_1_Oct_SF_Bin54	1	1	0	0	0	3	0	1	0	0	0	0	1	1	1	3	0	0	2	3	1	0	0	2	3	1	2	2	0	0	0	0	0	0	0	0	0	1	0	0	0	0	0	0	0	0	0	0
Nitrospirota	8_1_Oct_SF_Bin63	2	1	0	0	0	1	1	1	0	0	0	0	1	1	0	2	0	0	1	1	1	0	1	0	1	1	1	1	0	0	0	0	0	0	0	0	0	1	0	0	0	0	0	0	0	0	0	1
Nitrospirota	8_1_Oct_SF_Bin74	1	1	0	0	0	1	0	1	0	0	0	0	2	0	0	2	0	1	1	1	1	0	0	3	1	1	2	1	0	0	0	0	0	0	1	0	0	2	0	0	0	0	0	0	0	0	0	1
Nitrospira_inopinata	GCF_001458695.1	1	1	0	0	1	2	0	1	0	0	0	0	0	1	1	1	0	0	2	2	1	0	0	2	1	2	1	1	0	1	1	0	0	0	0	0	0	1	0	0	1	0	0	0	0	0	0	3
Nitrospira_japonica	GCF_900169565.1	3	1	0	1	1	4	0	1	0	0	1	0	1	1	1	1	0	0	2	2	1	0	0	2	1	2	1	1	0	1	1	0	1	0	1	1	1	1	0	0	1	0	0	0	0	0	0	3
Nitrospira_moscoviensis	GCF_001273775.1	5	4	0	1	1	7	0	1	0	0	0	0	1	1	0	1	0	0	3	2	1	0	2	3	1	2	1	1	0	2	2	1	1	0	0	0	1	1	0	0	1	0	0	0	0	0	0	3
[truncated: 91 more columns]
